# Supplementary material for: A direct access to bioactive fused N-heterocyclic acetic acid derivatives
Source: Royal Society of Chemistry journal article supplement (doi:10.1039/c3ob42535e), 2014-01-01
Supplement: c3ob42535e1.pdf [file c3ob42535e1.pdf]

### Copies of $^1\text{H}$ and $^{13}\text{C}$ NMR

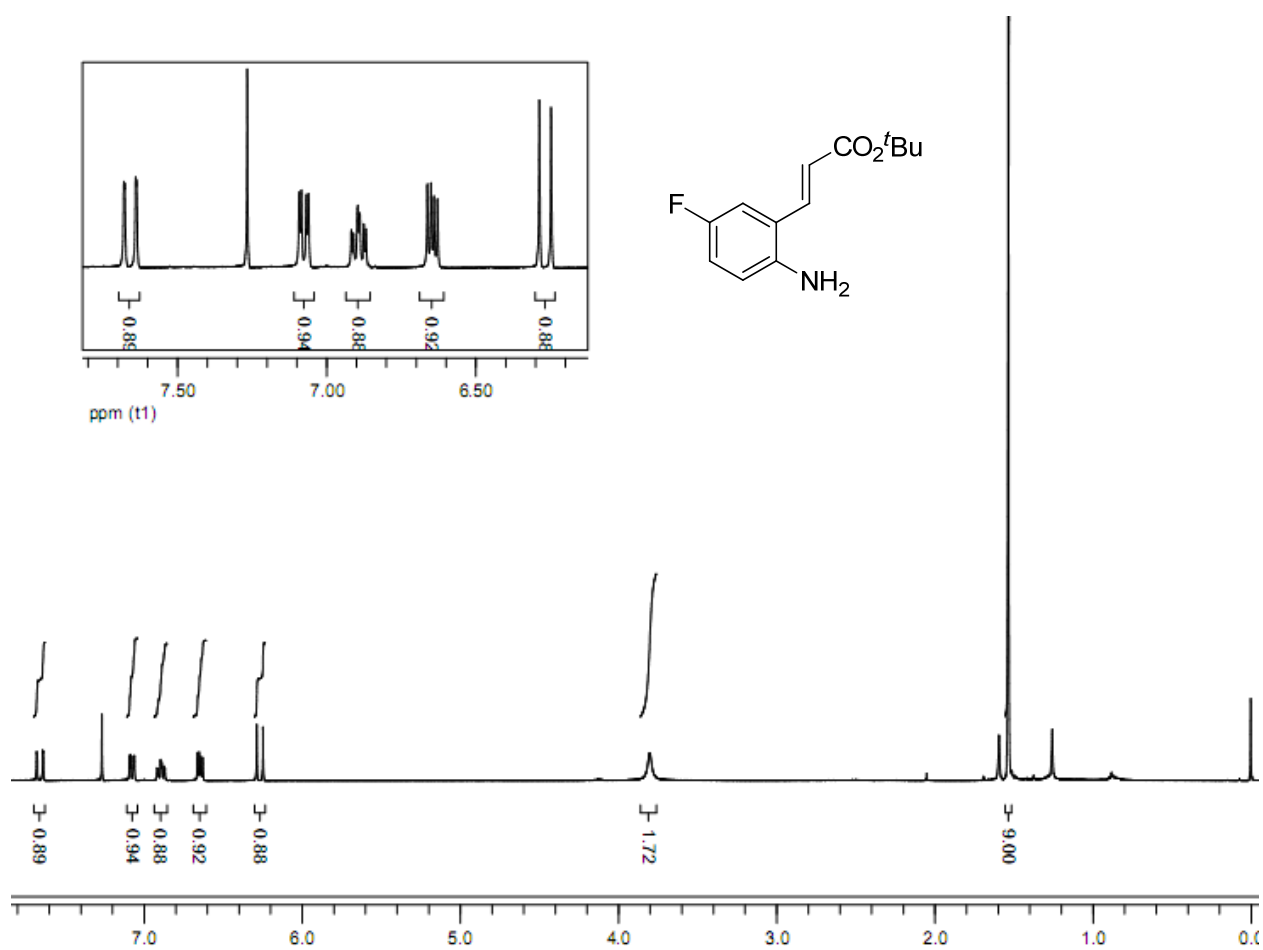

Fig. 1:  $^1\text{H}$  NMR spectra of compound **S-2c** ( $\text{CDCl}_3$ , 400 MHz)

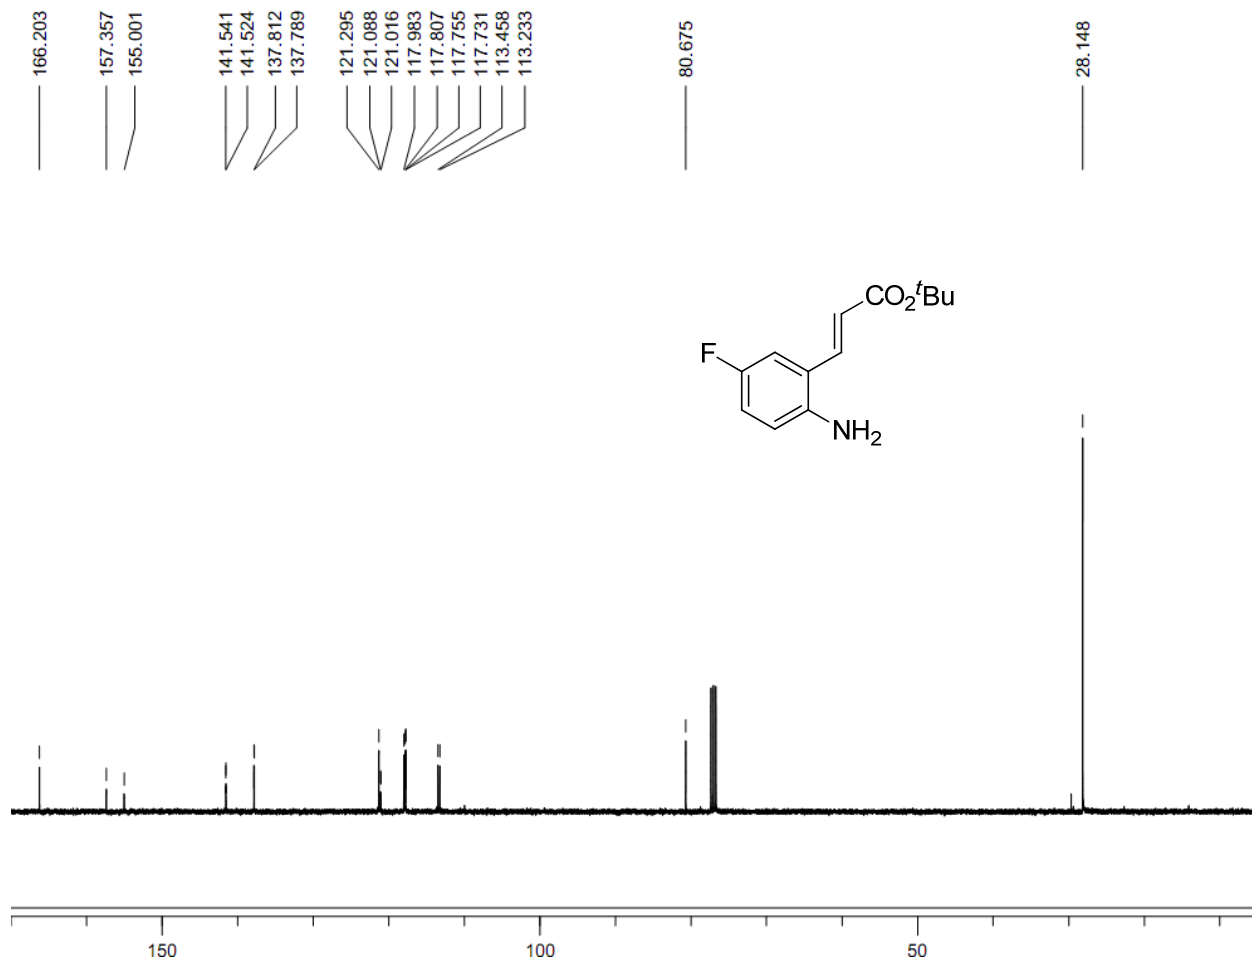

Fig. 2:  $^{13}\text{C}$  NMR spectra of compound **S-2c** ( $\text{CDCl}_3$ , 100 MHz)

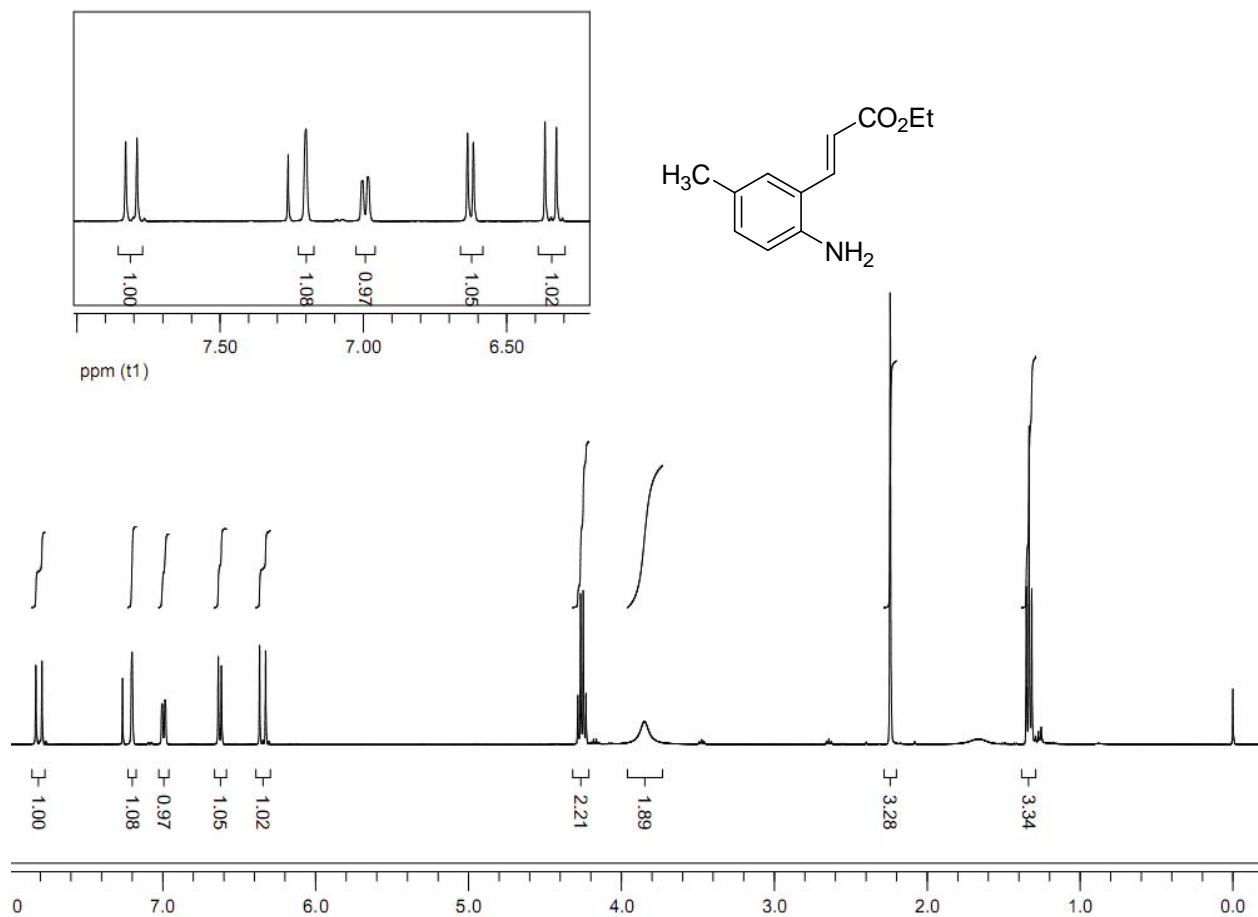

Fig. 3: <sup>1</sup>H NMR spectra of compound **S-2f** (CDCl<sub>3</sub>, 400 MHz)

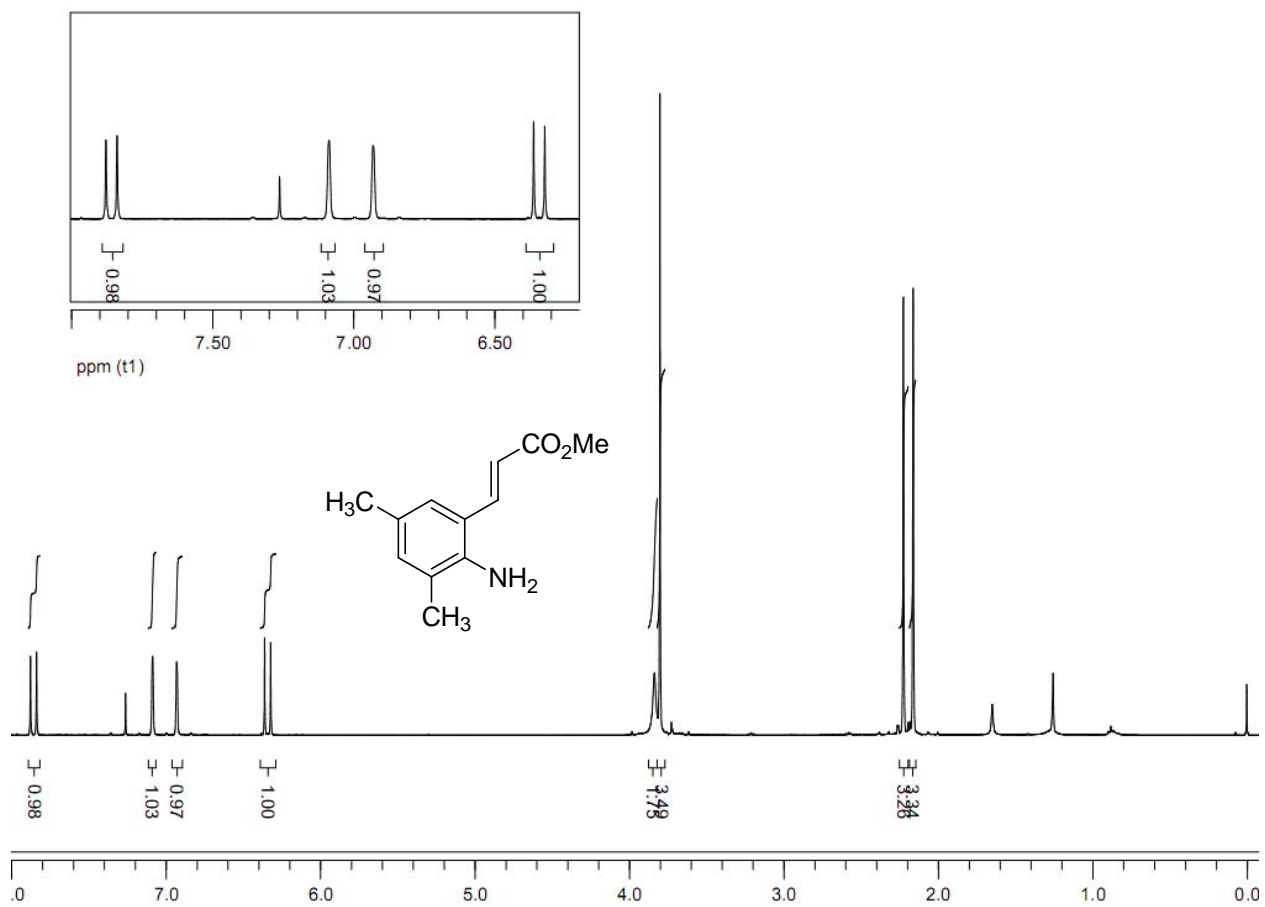

Fig. 4:  $^1\text{H}$  NMR spectra of compound **S-2g** ( $\text{CDCl}_3$ , 400 MHz)

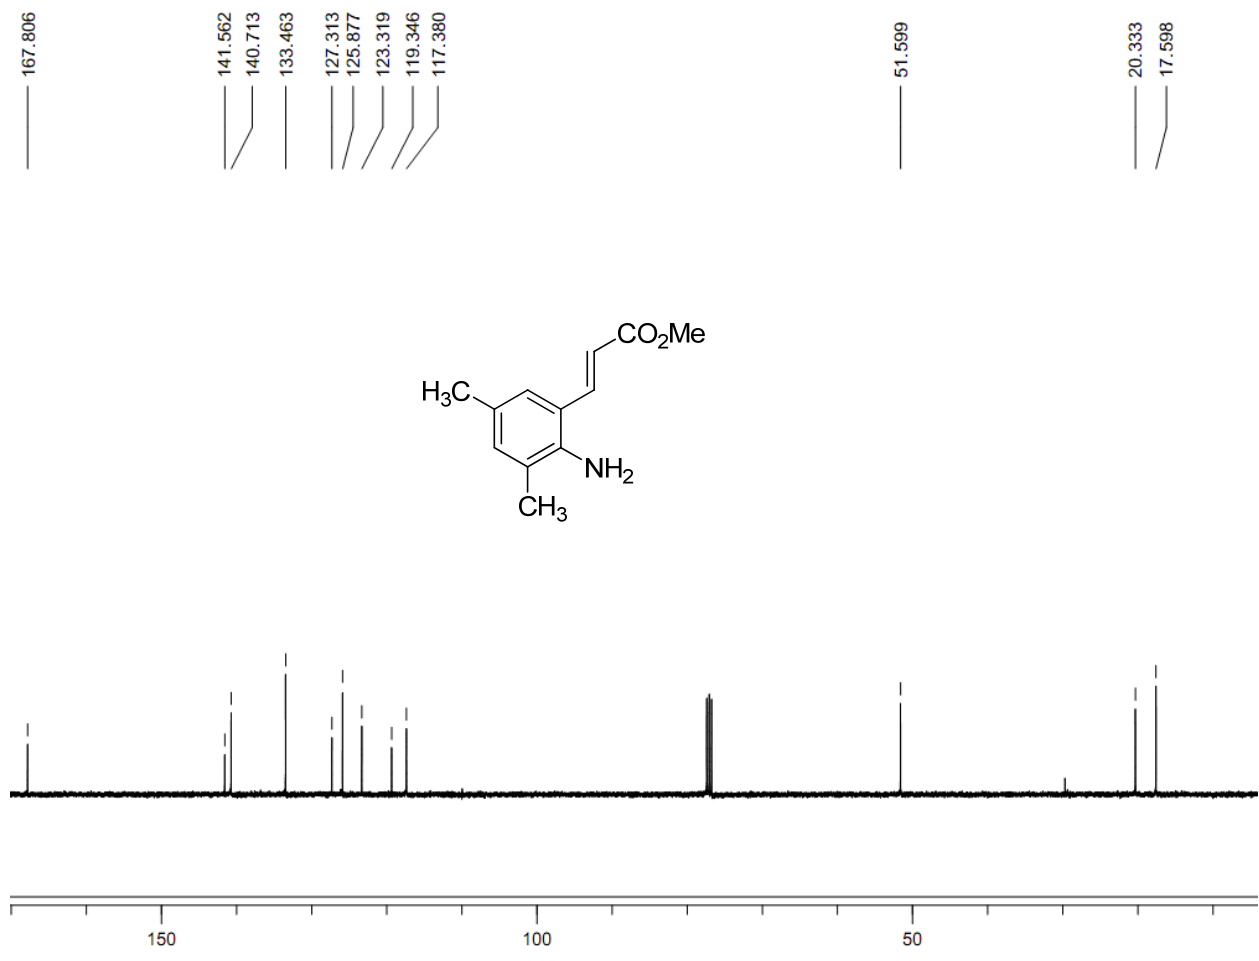

Fig. 5: <sup>13</sup>C NMR spectra of compound **S-2g** (CDCl<sub>3</sub>, 100 MHz)

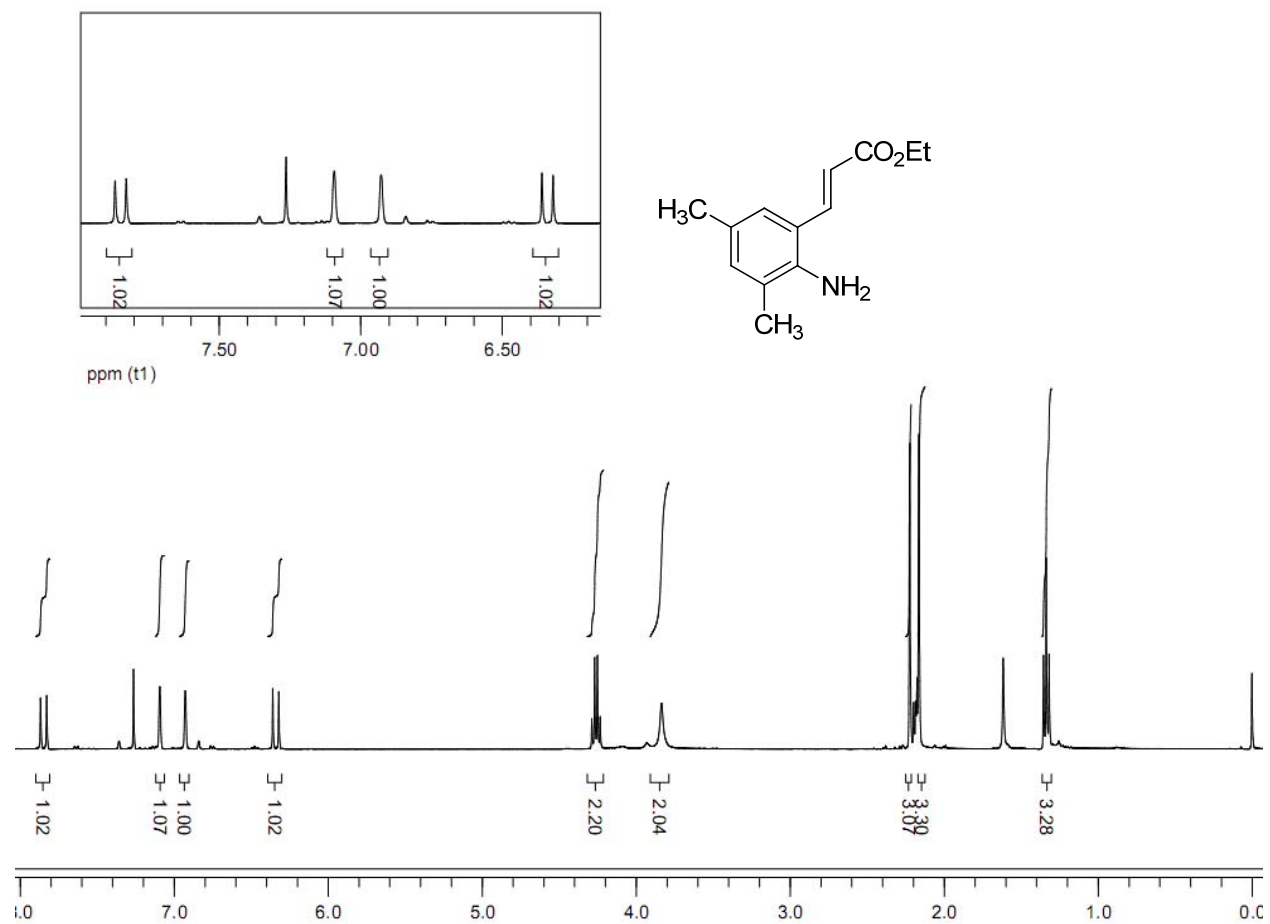

Fig. 6:  $^1\text{H}$  NMR spectra of compound **S-2h** ( $\text{CDCl}_3$ , 400 MHz)

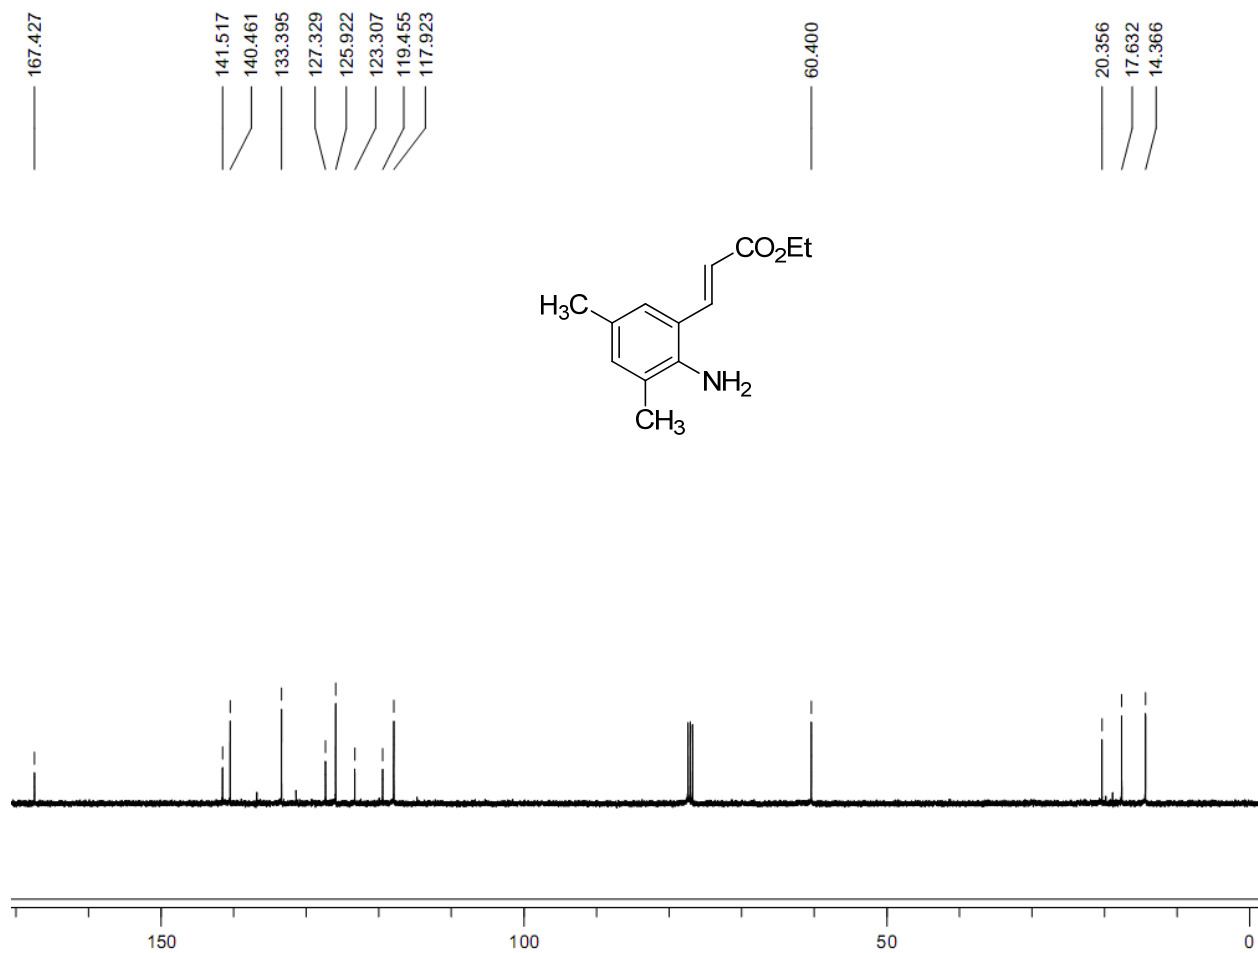

Fig. 7:  $^{13}\text{C}$  NMR spectra of compound **S-2h** ( $\text{CDCl}_3$ , 100 MHz)

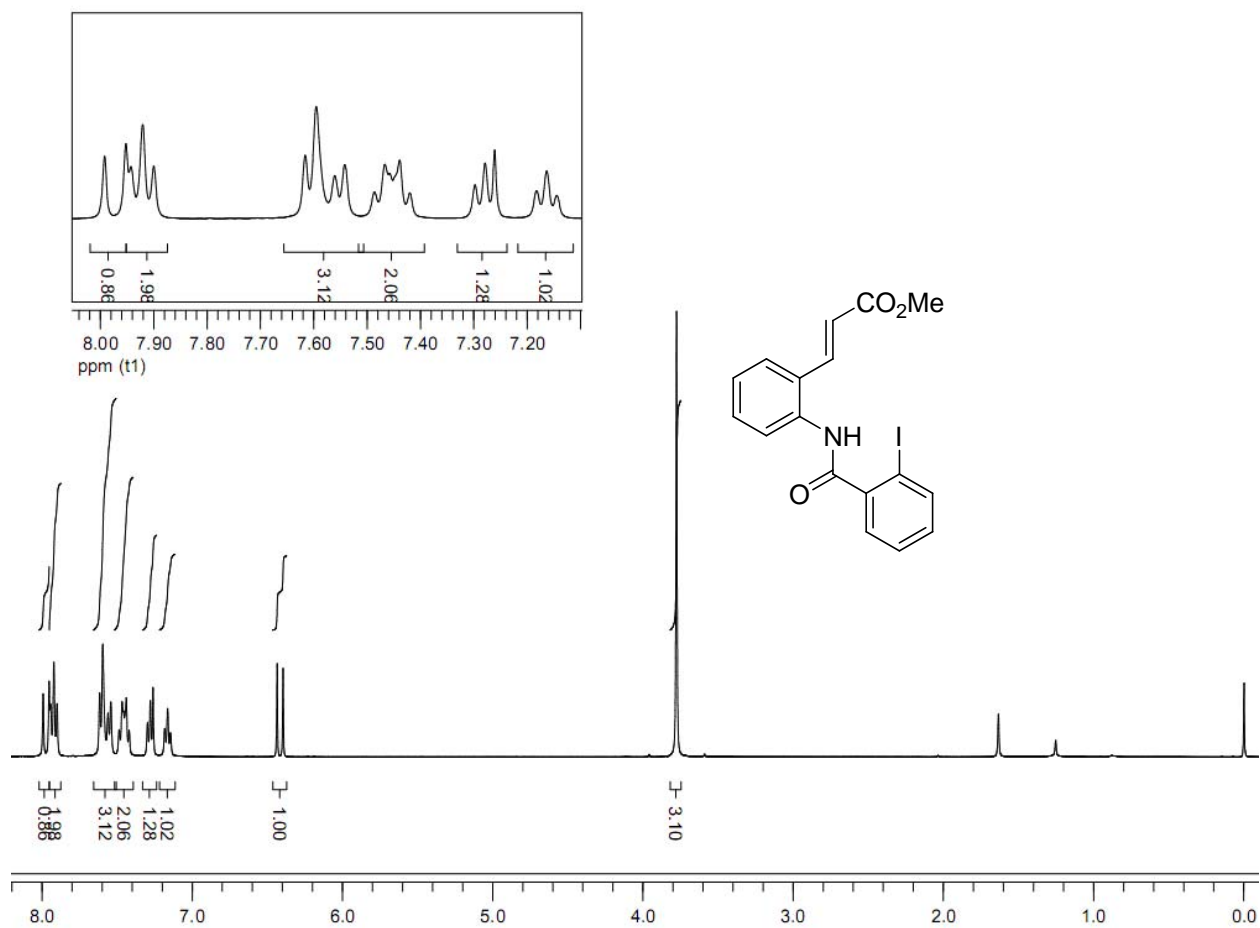

Fig. 8:  $^1\text{H}$  NMR spectra of compound **1a** ( $\text{CDCl}_3$ , 400 MHz)



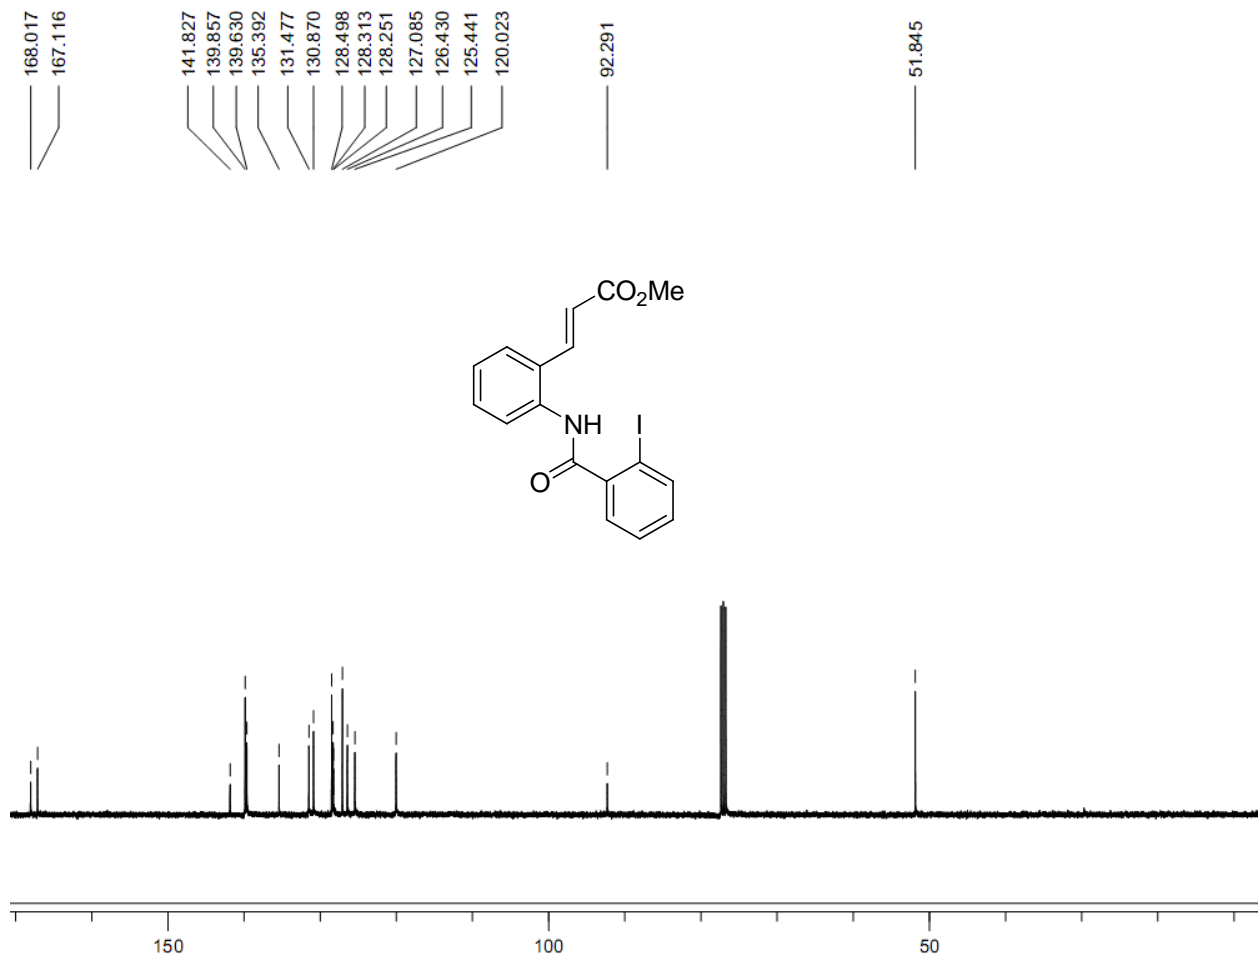

Fig. 9:  $^{13}\text{C}$  NMR spectra of **1a** ( $\text{CDCl}_3$ , 100 MHz)

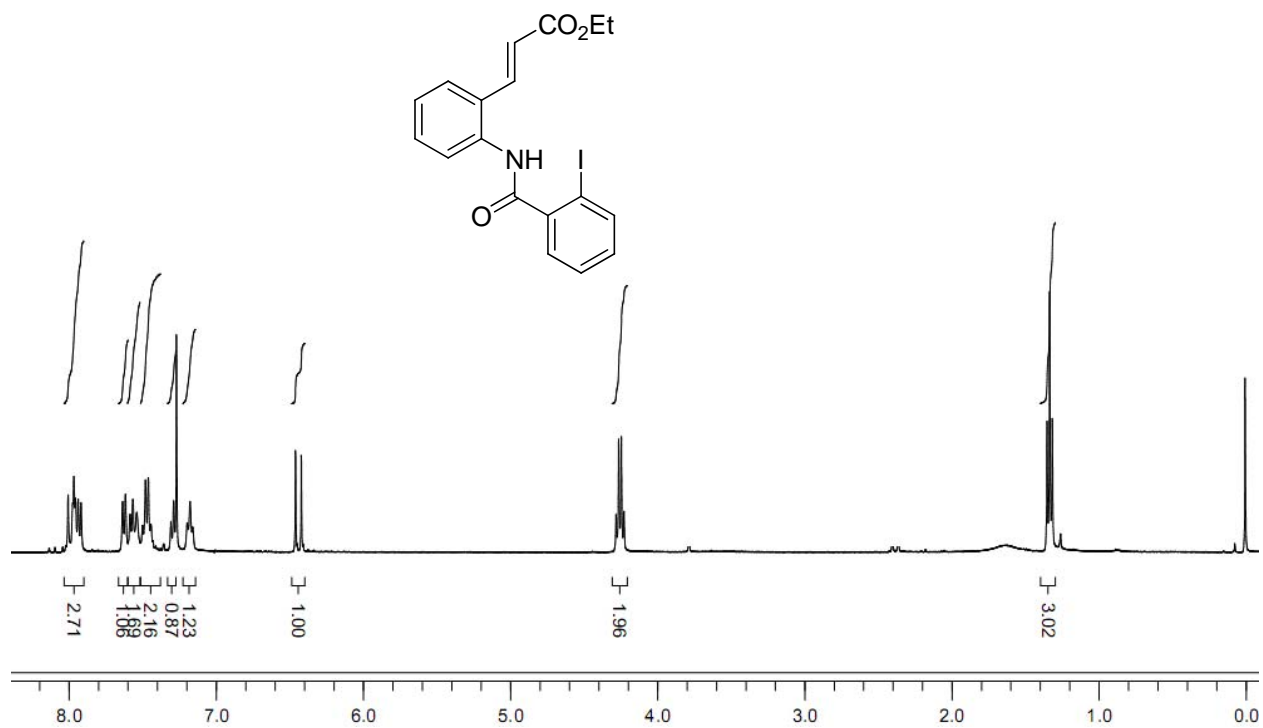

Fig. 10:  $^1\text{H}$  NMR spectra of compound **1b** ( $\text{CDCl}_3$ , 400 MHz)

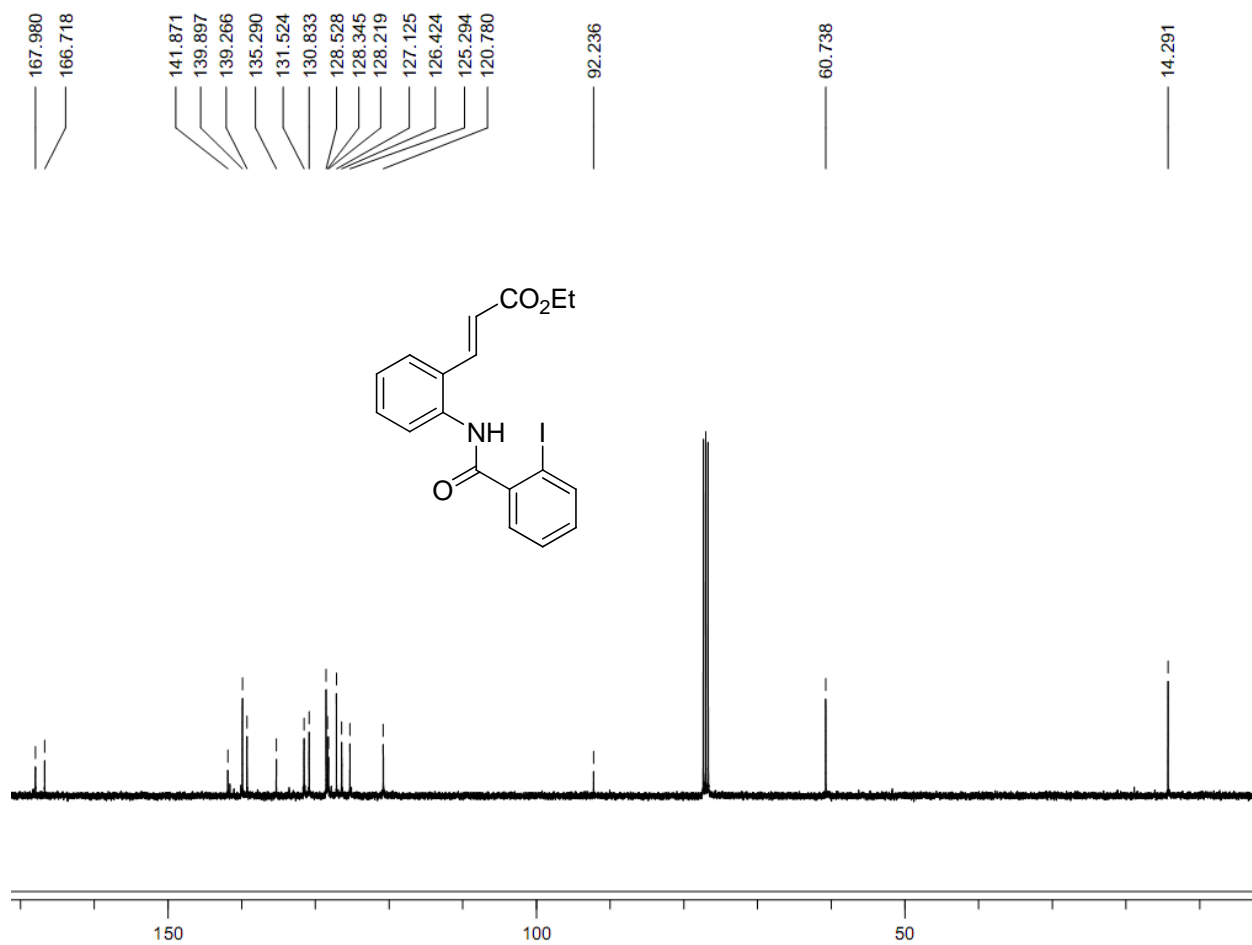

Fig. 11:  $^{13}\text{C}$  NMR spectra of compound **1b** ( $\text{CDCl}_3$ , 100 MHz)

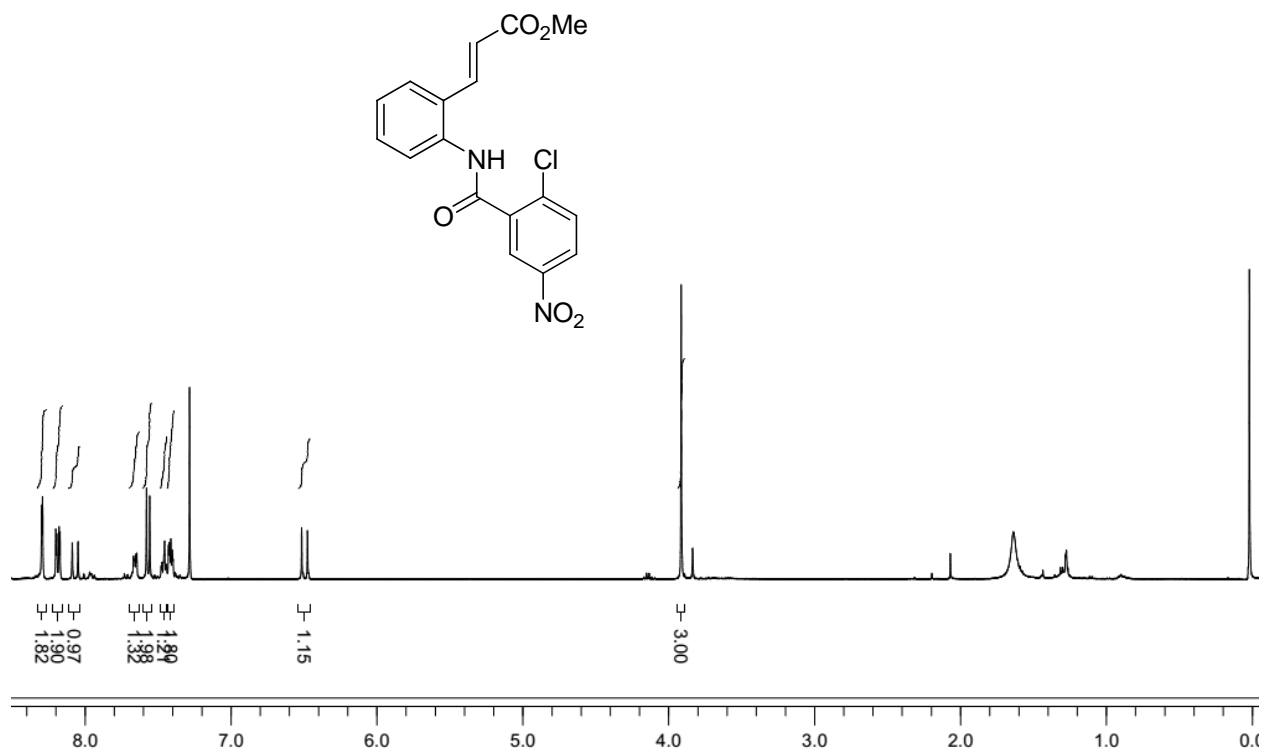

Fig. 12: <sup>1</sup>H NMR spectra of compound **1c** (CDCl<sub>3</sub>, 400 MHz)

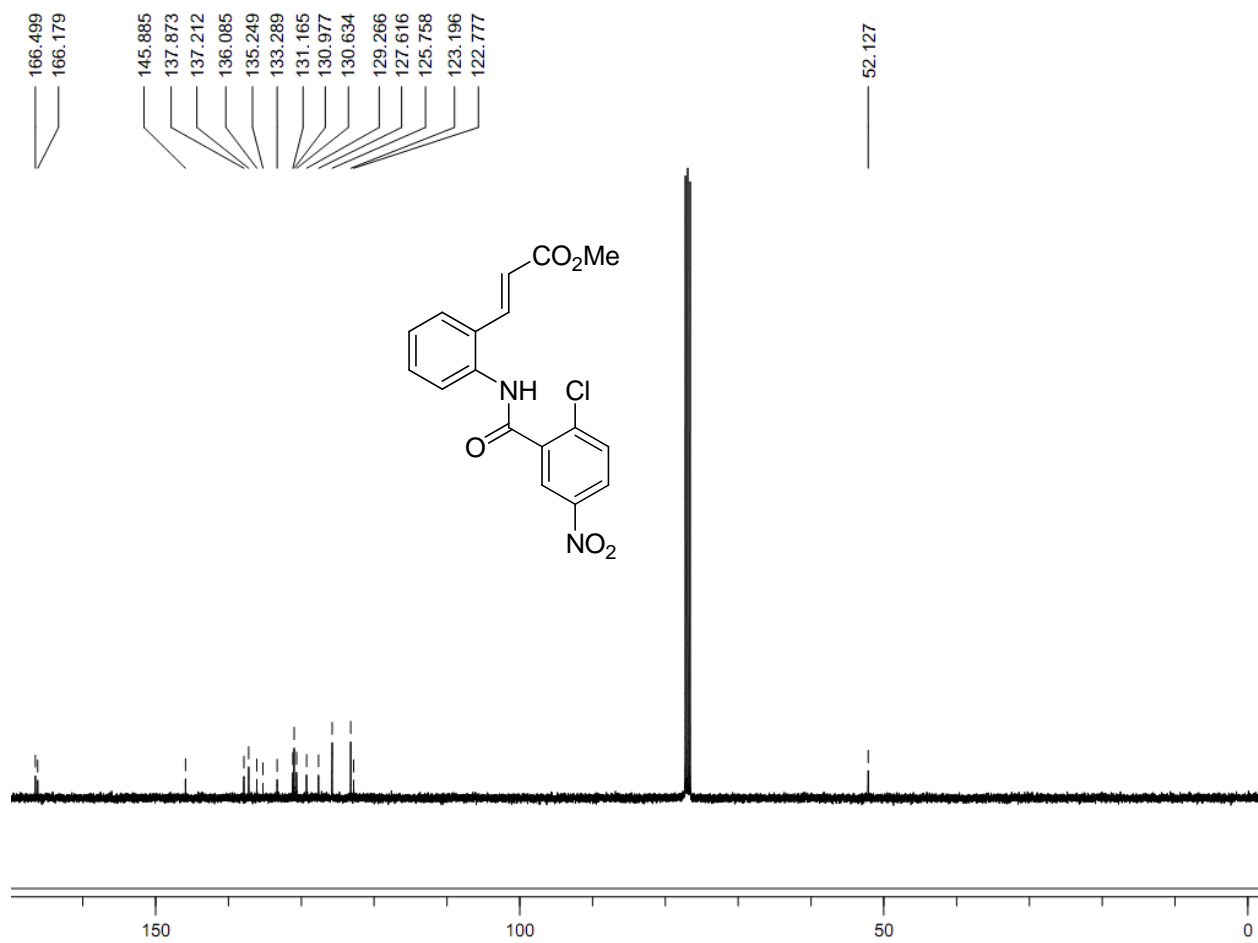

Fig. 13:  $^{13}\text{C}$  NMR spectra of compound **1c** ( $\text{CDCl}_3$ , 100 MHz)

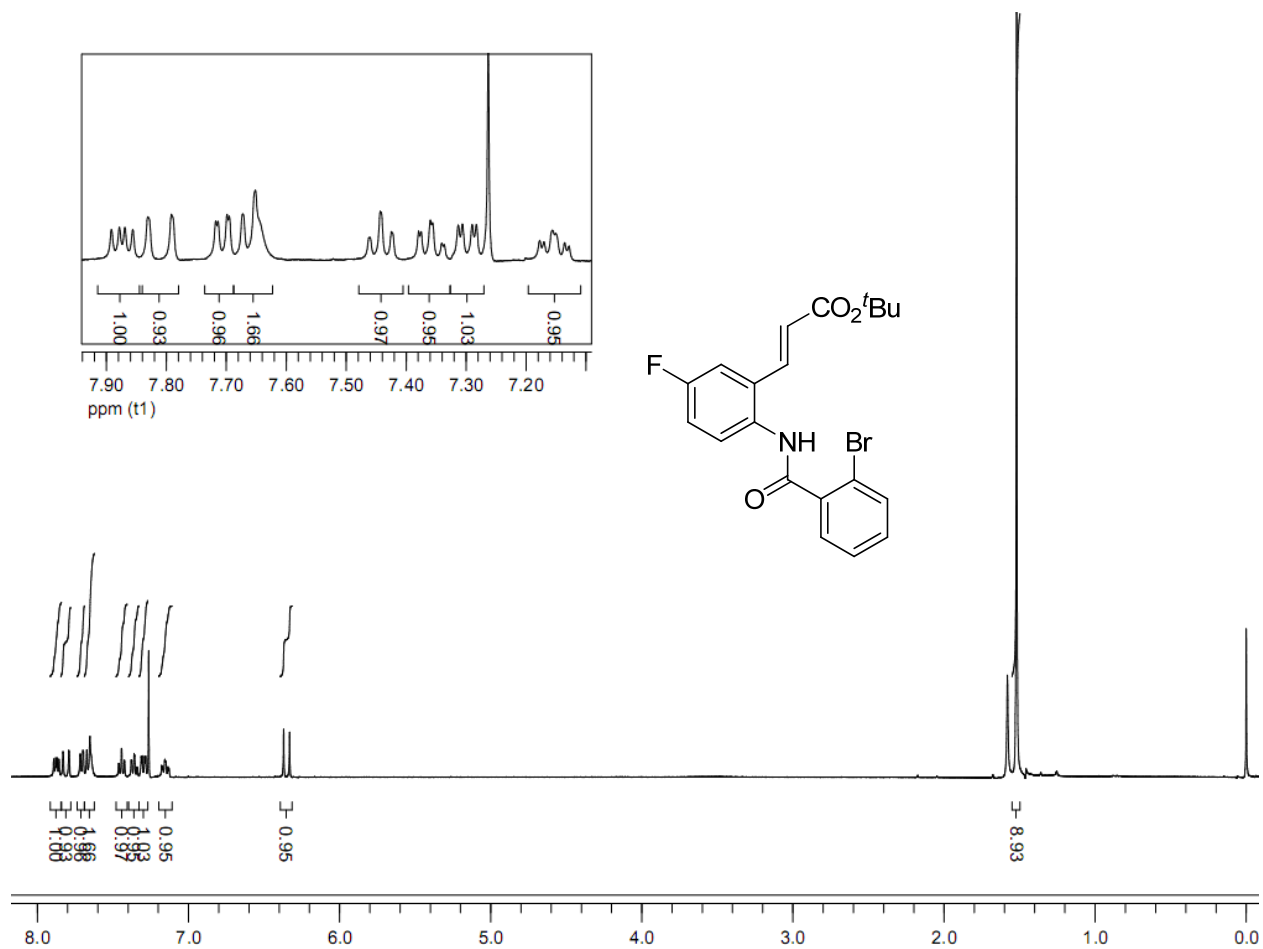

Fig. 14: <sup>1</sup>H NMR spectra of compound **1d** (CDCl<sub>3</sub>, 400 MHz)

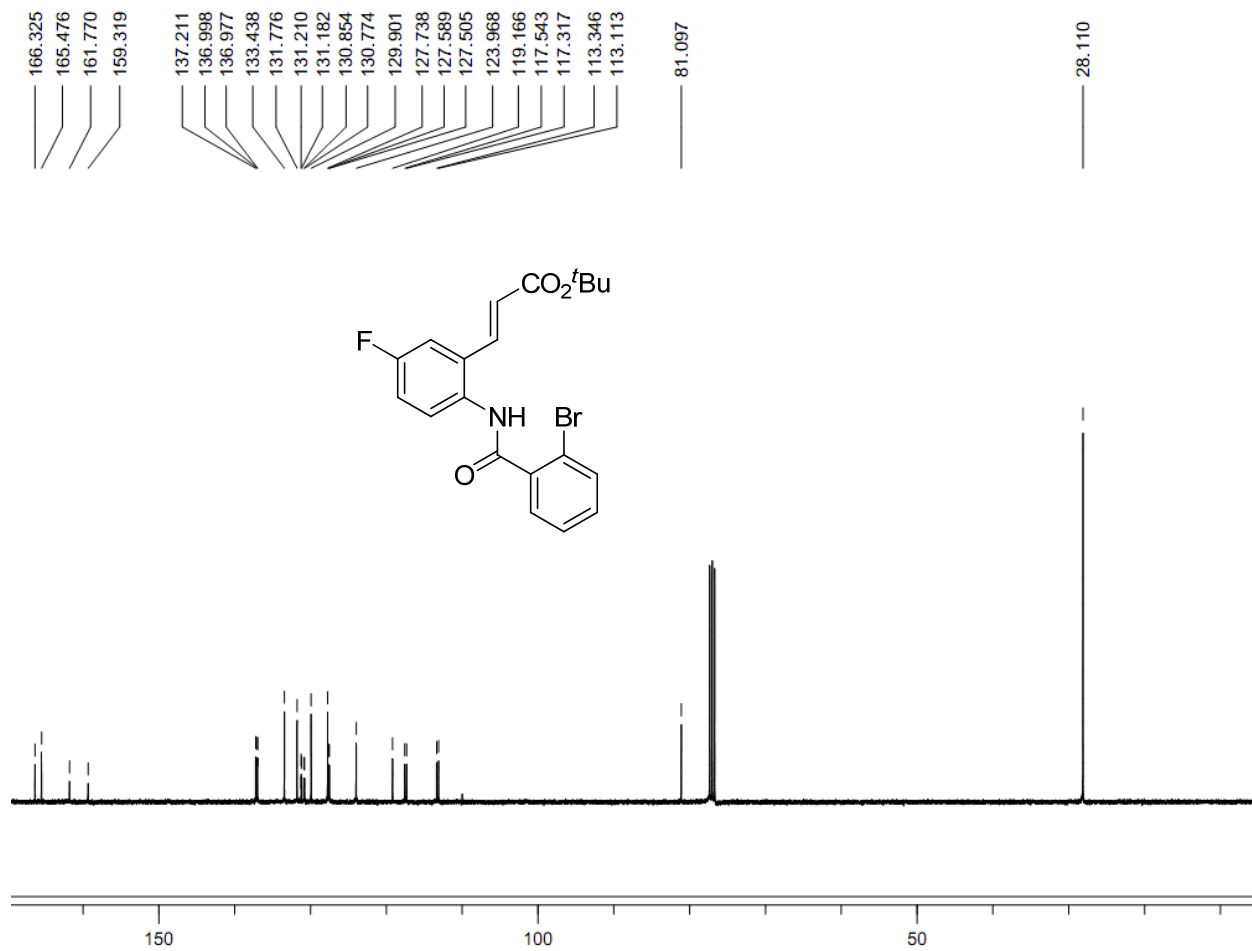

Fig. 15: <sup>13</sup>C NMR spectra of compound **1d** (CDCl<sub>3</sub>, 100 MHz)

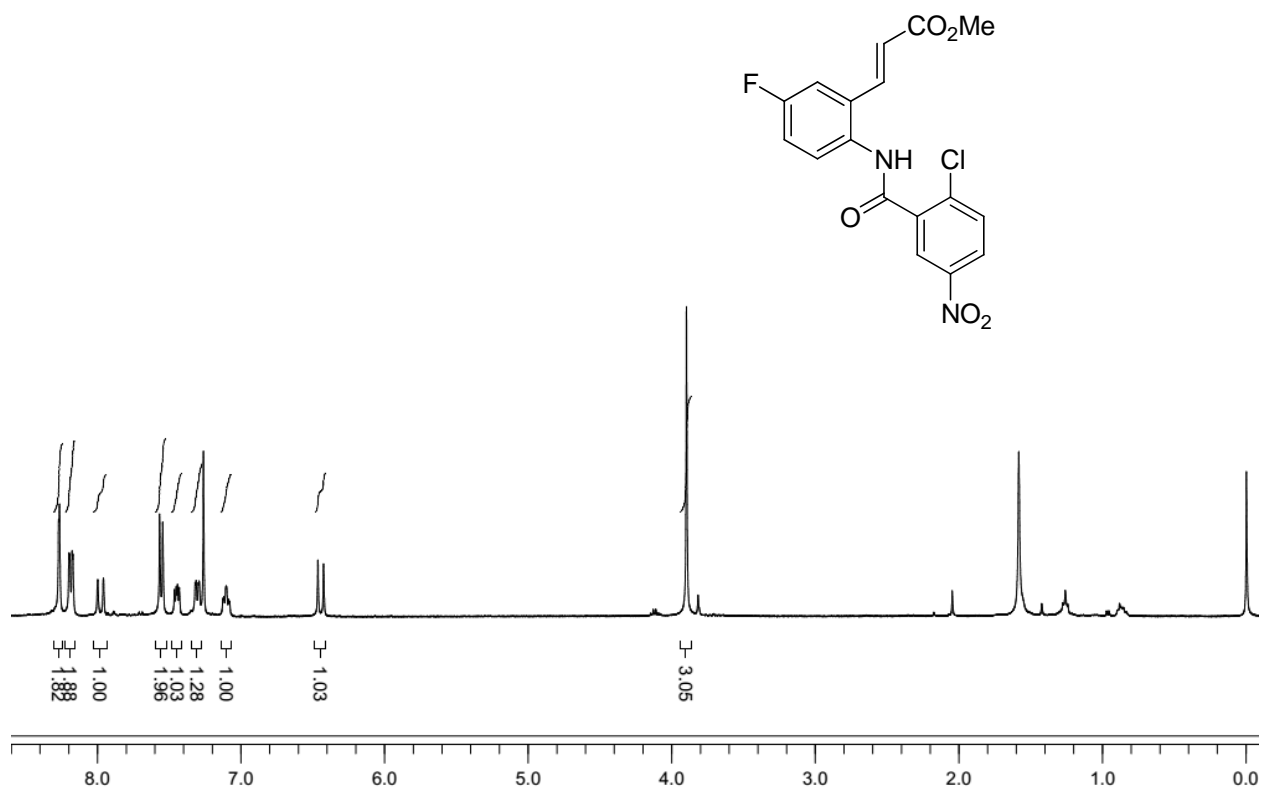

Fig. 16: <sup>1</sup>H NMR spectra of compound **1e** (CDCl<sub>3</sub>, 400 MHz)



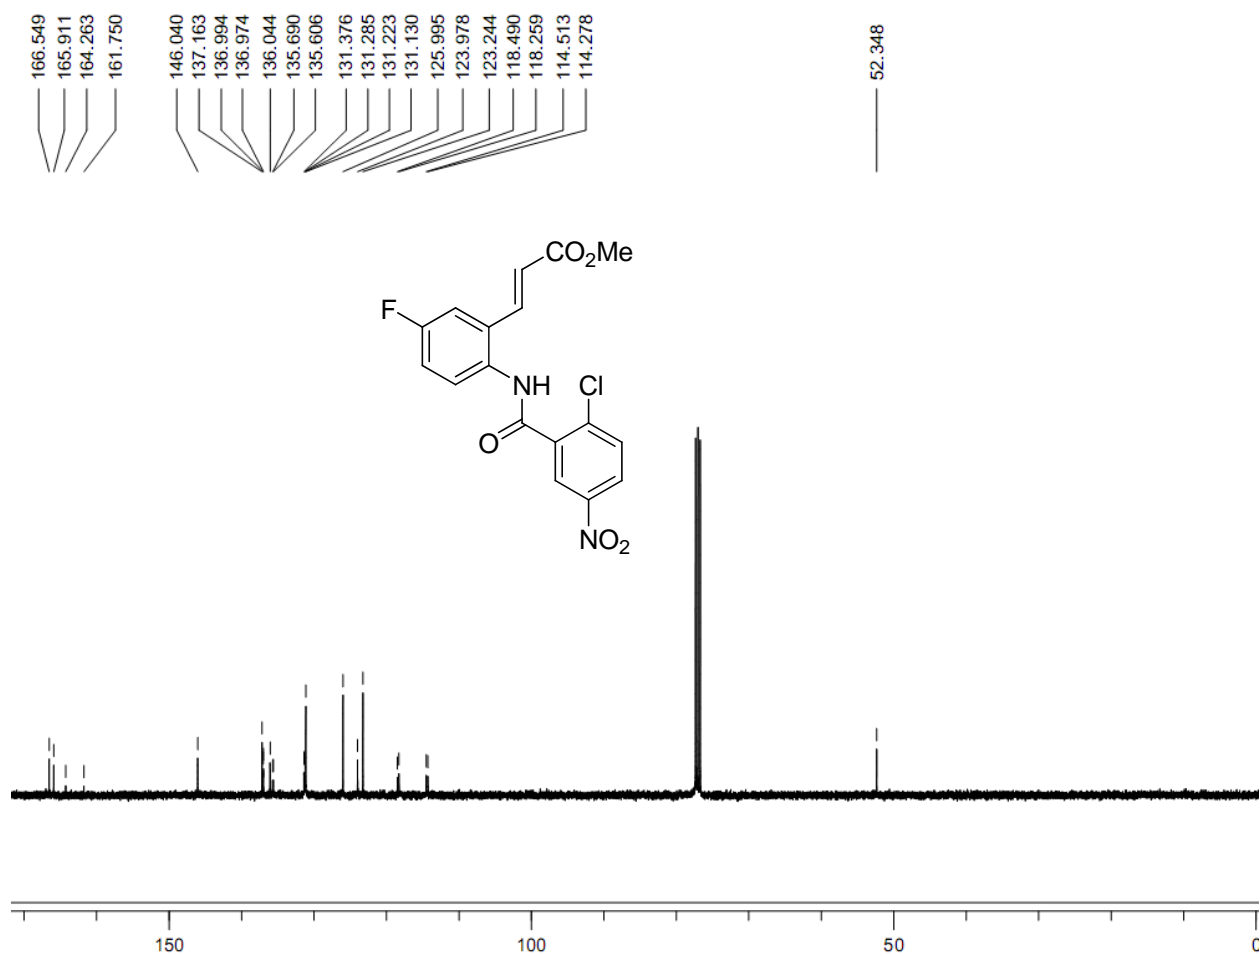

Fig. 17: <sup>13</sup>C NMR spectra of compound **1e** (CDCl<sub>3</sub>, 100 MHz)

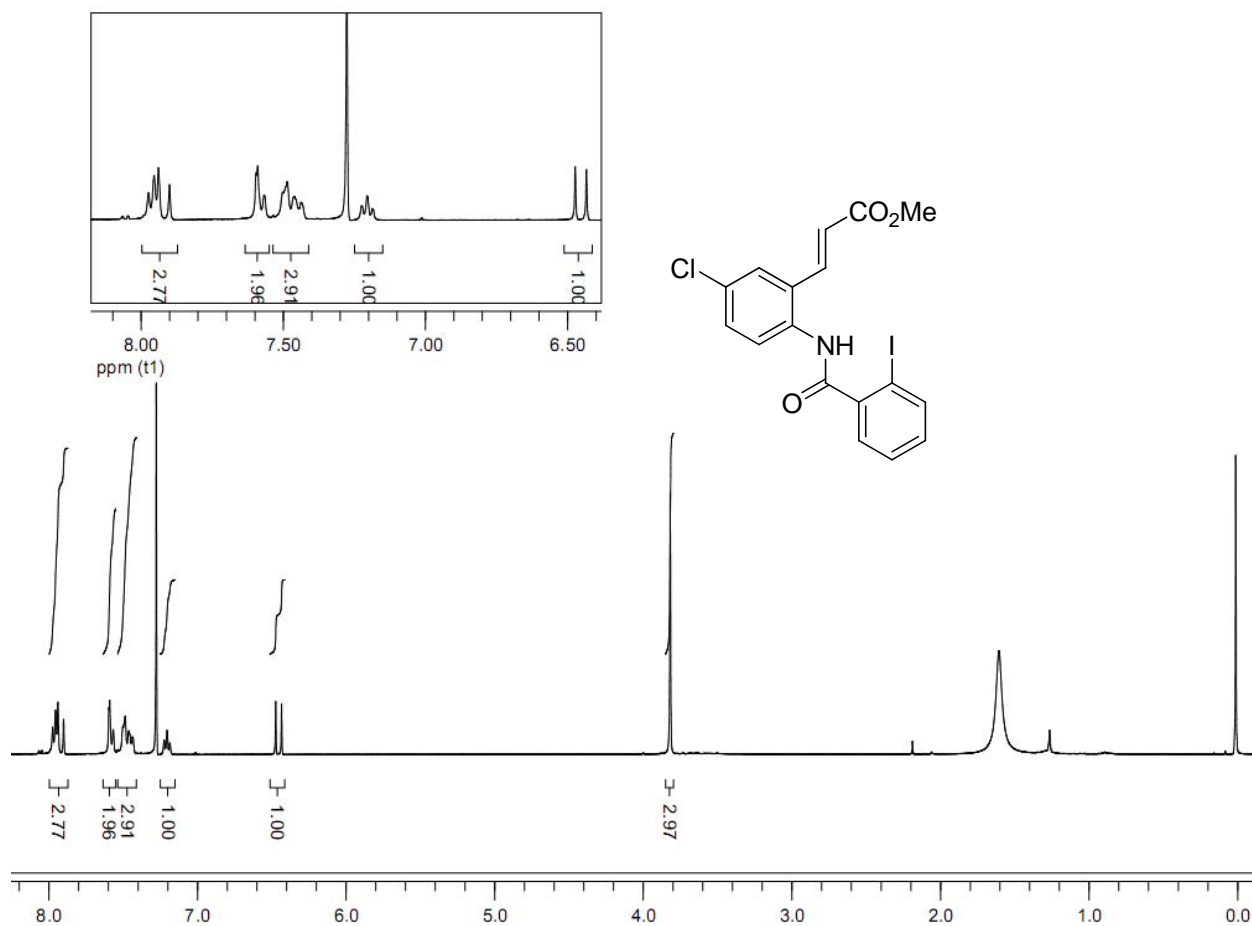

Fig. 18:  $^1\text{H}$  NMR spectra of compound **1f** ( $\text{CDCl}_3$ , 400 MHz)

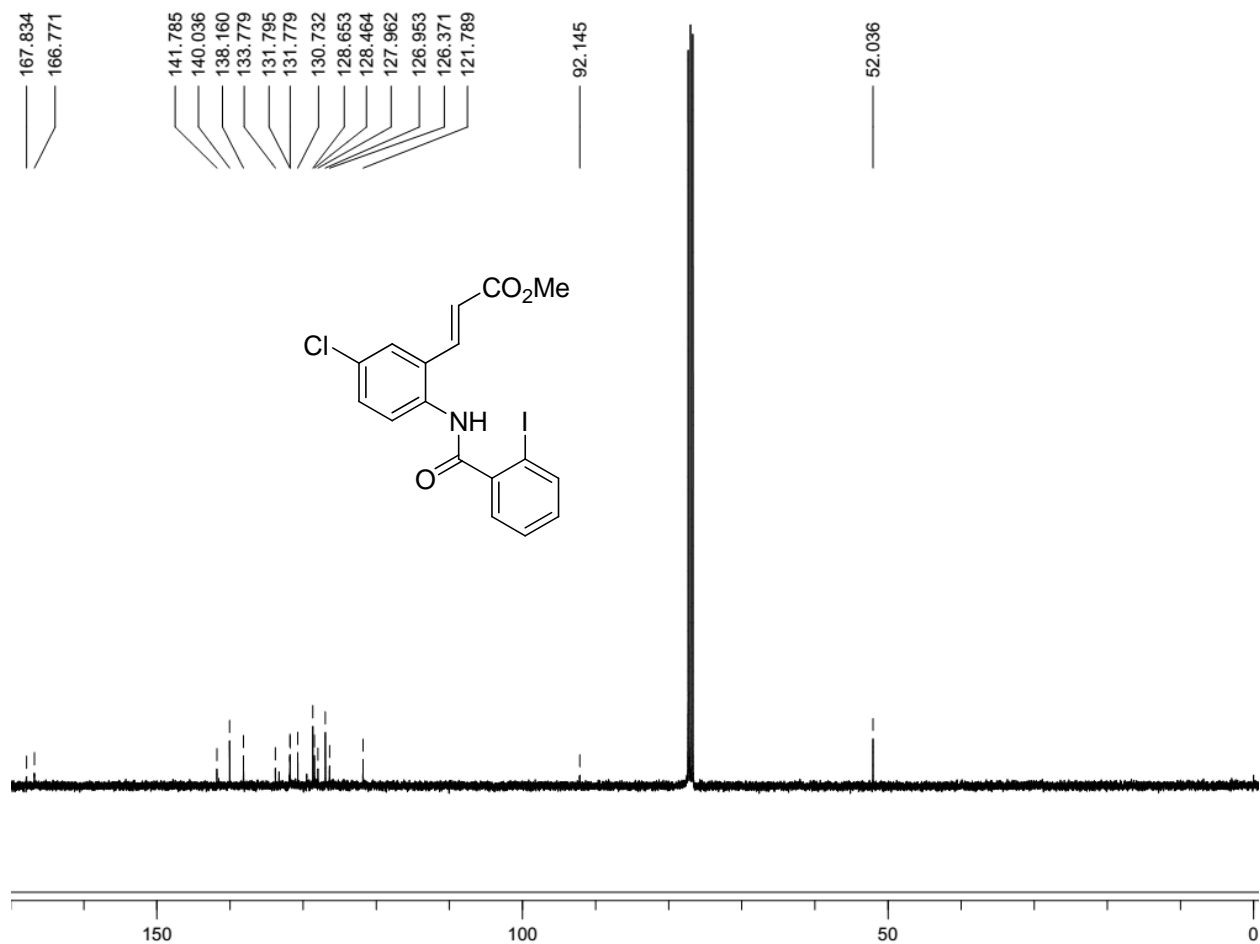

Fig. 19: <sup>13</sup>C NMR spectra of compound **1f** (CDCl<sub>3</sub>, 100 MHz)

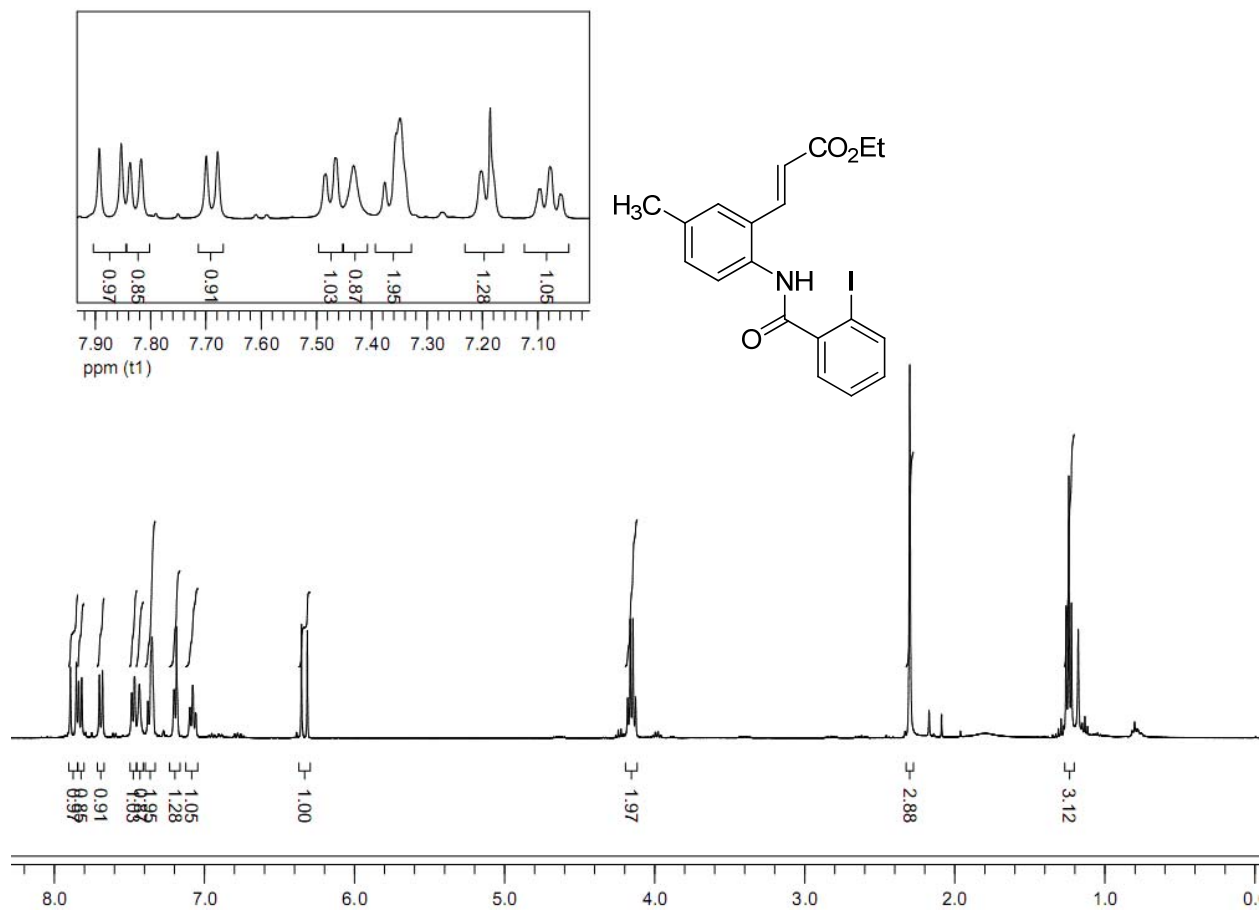

Fig. 20:  $^1\text{H}$  NMR spectra of compound **1g** ( $\text{CDCl}_3$ , 400 MHz)

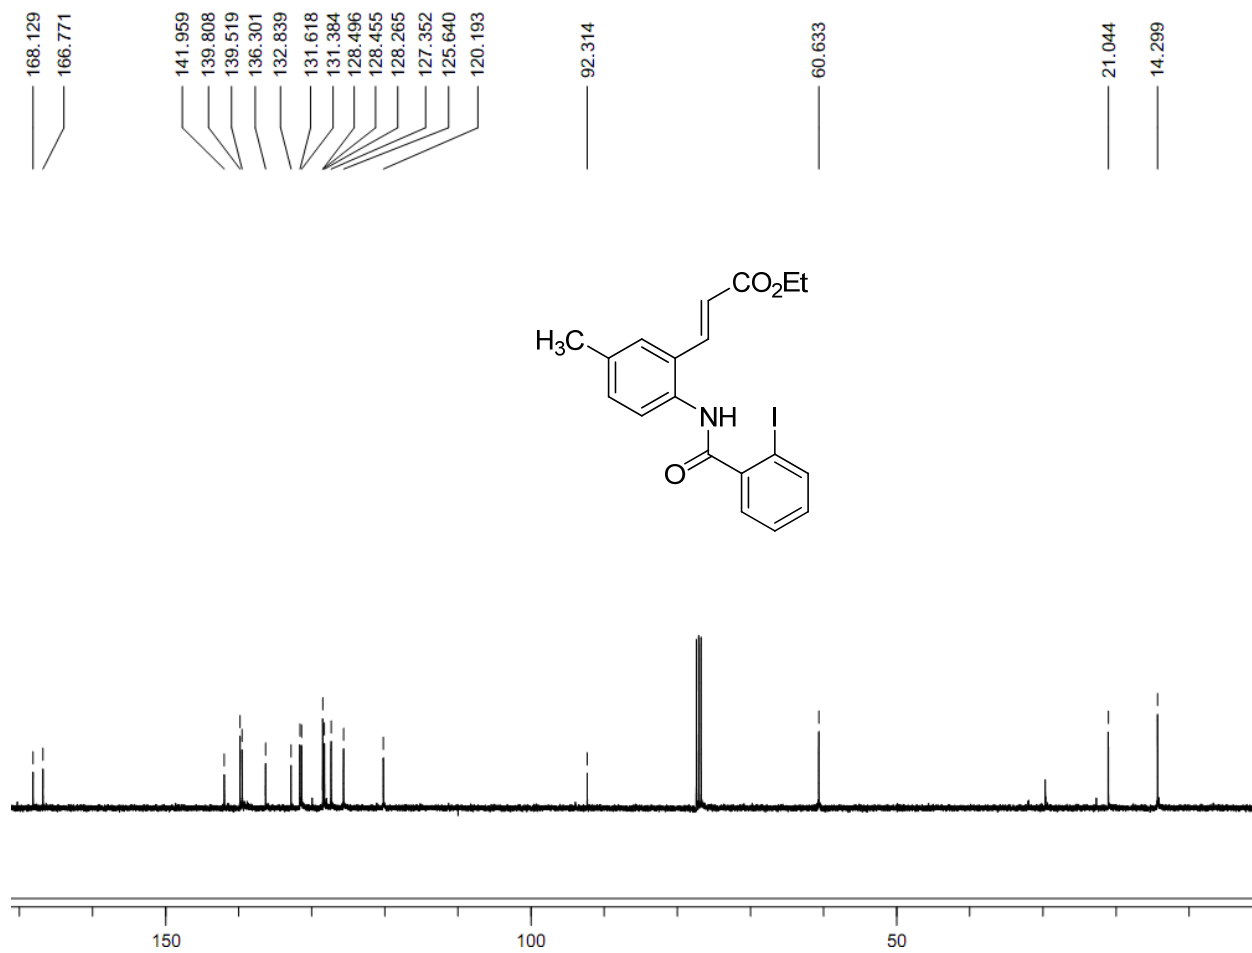

Fig. 21:  $^{13}\text{C}$  NMR spectra of compound **1g** ( $\text{CDCl}_3$ , 100 MHz)

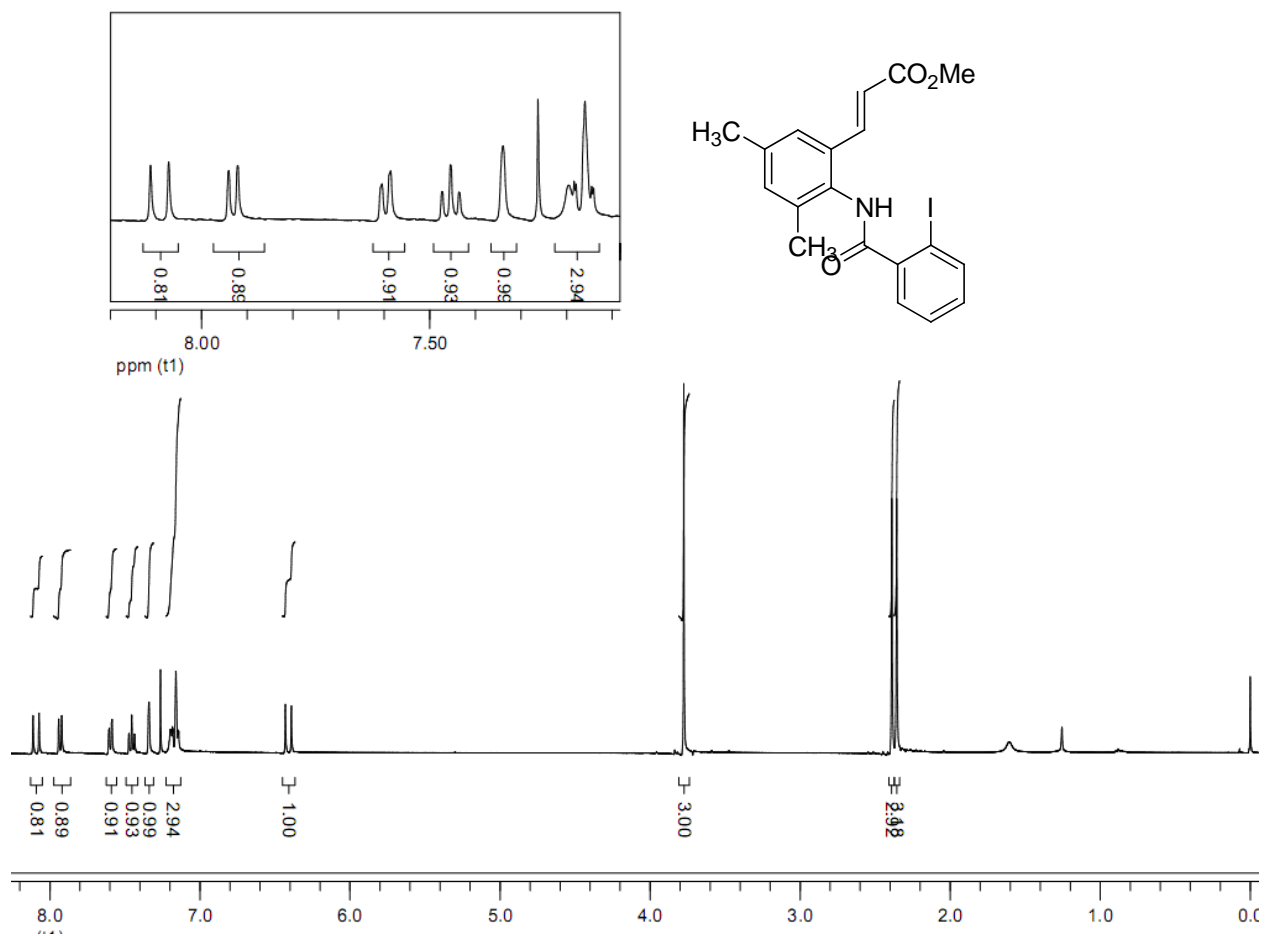

Fig. 22: <sup>1</sup>H NMR spectra of compound **1h** (CDCl<sub>3</sub>, 400 MHz)

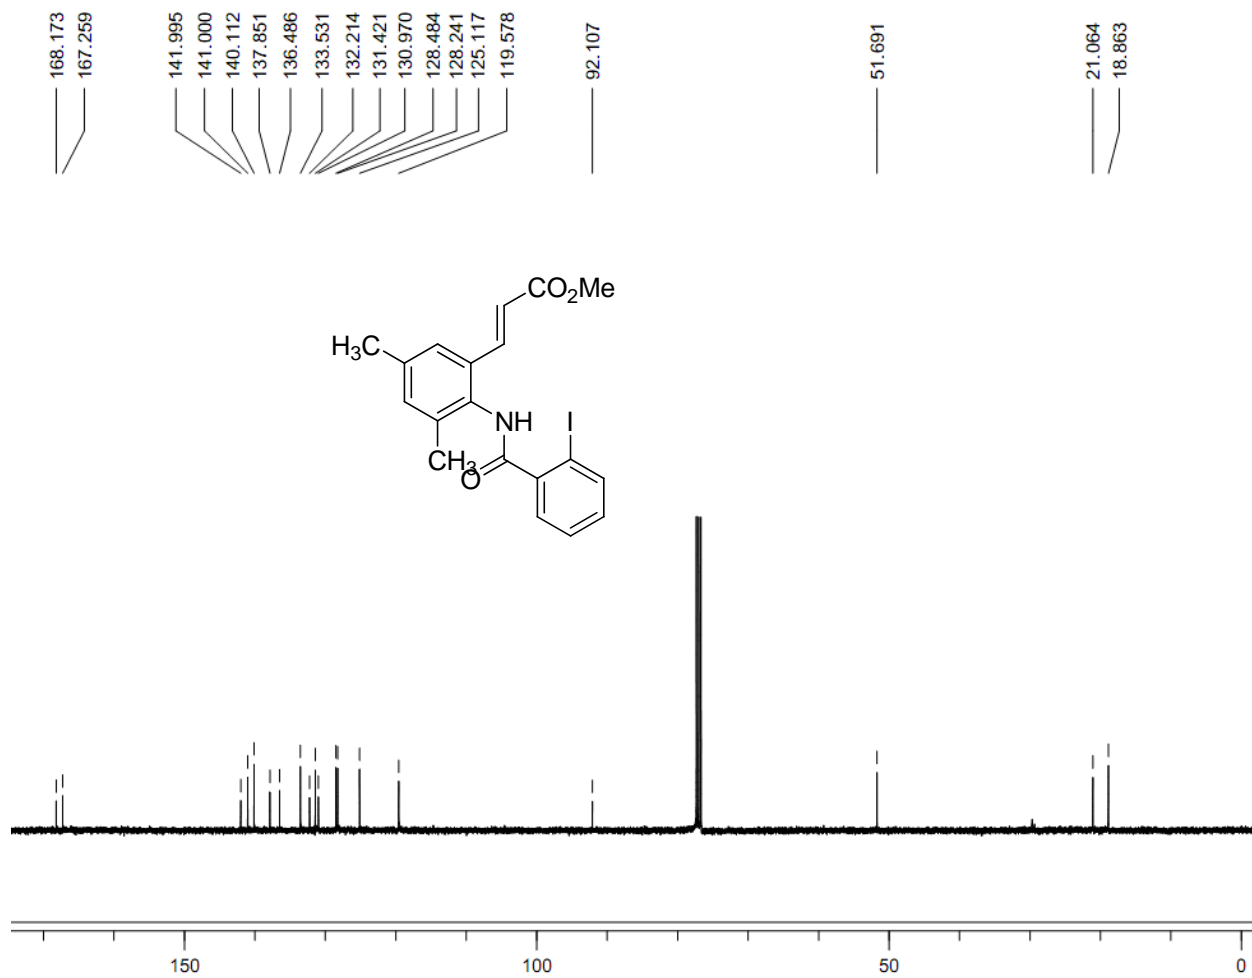

Fig. 23: <sup>13</sup>C NMR spectra of compound **1h** (CDCl<sub>3</sub>, 100 MHz)

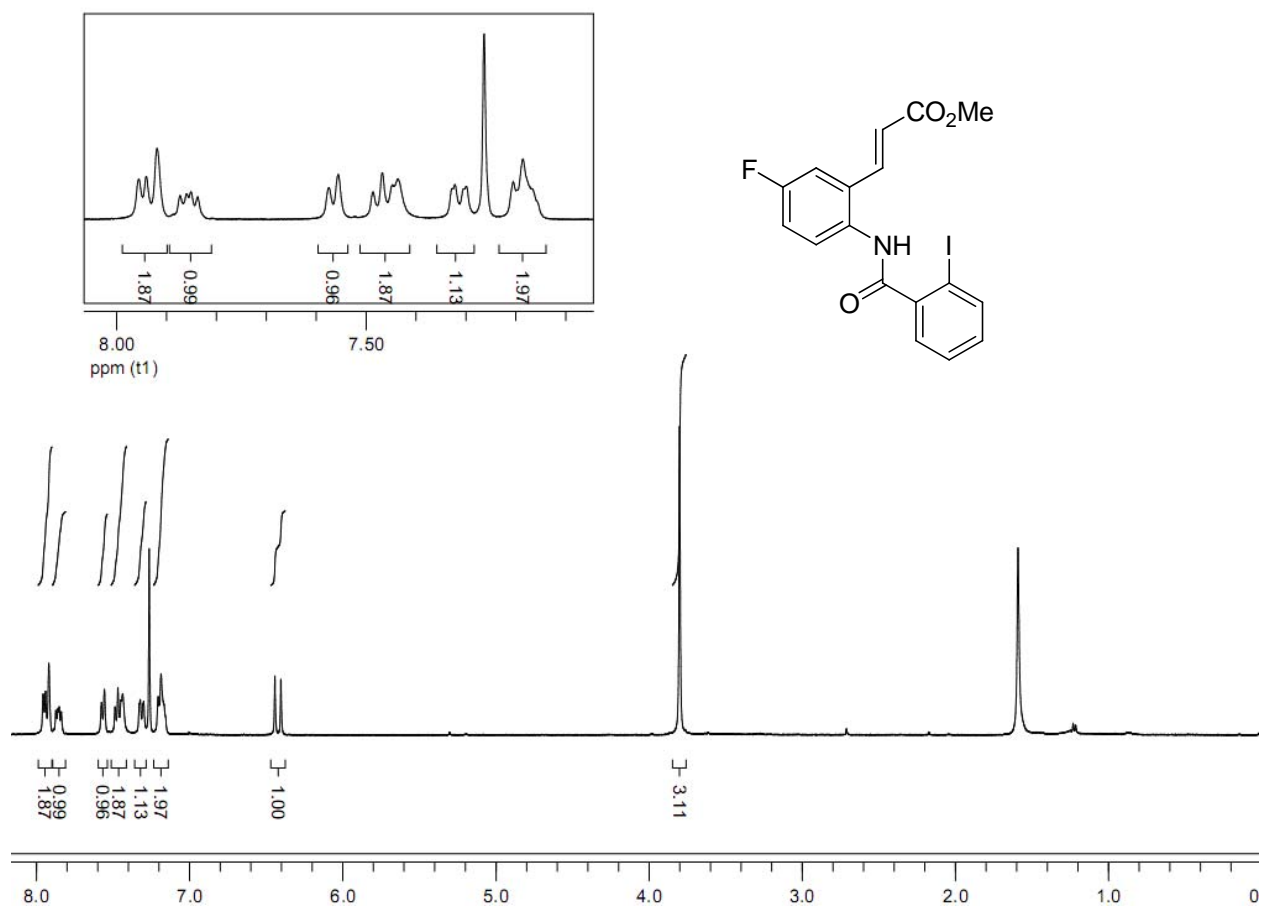

Fig. 24: <sup>1</sup>H NMR spectra of compound **1i** (CDCl<sub>3</sub>, 400 MHz)



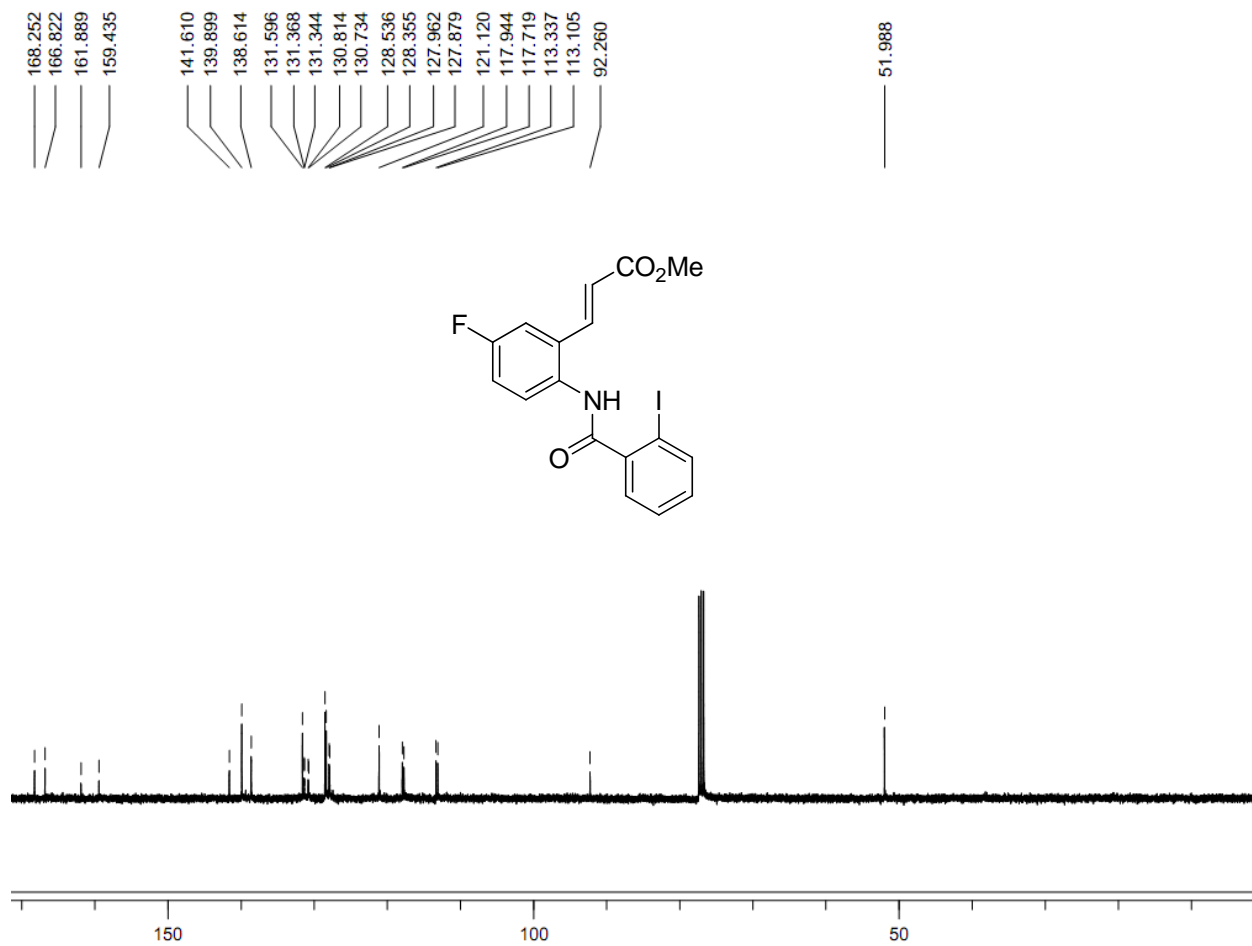

Fig. 25:  $^{13}\text{C}$  NMR spectra of **1i** ( $\text{CDCl}_3$ , 100 MHz)

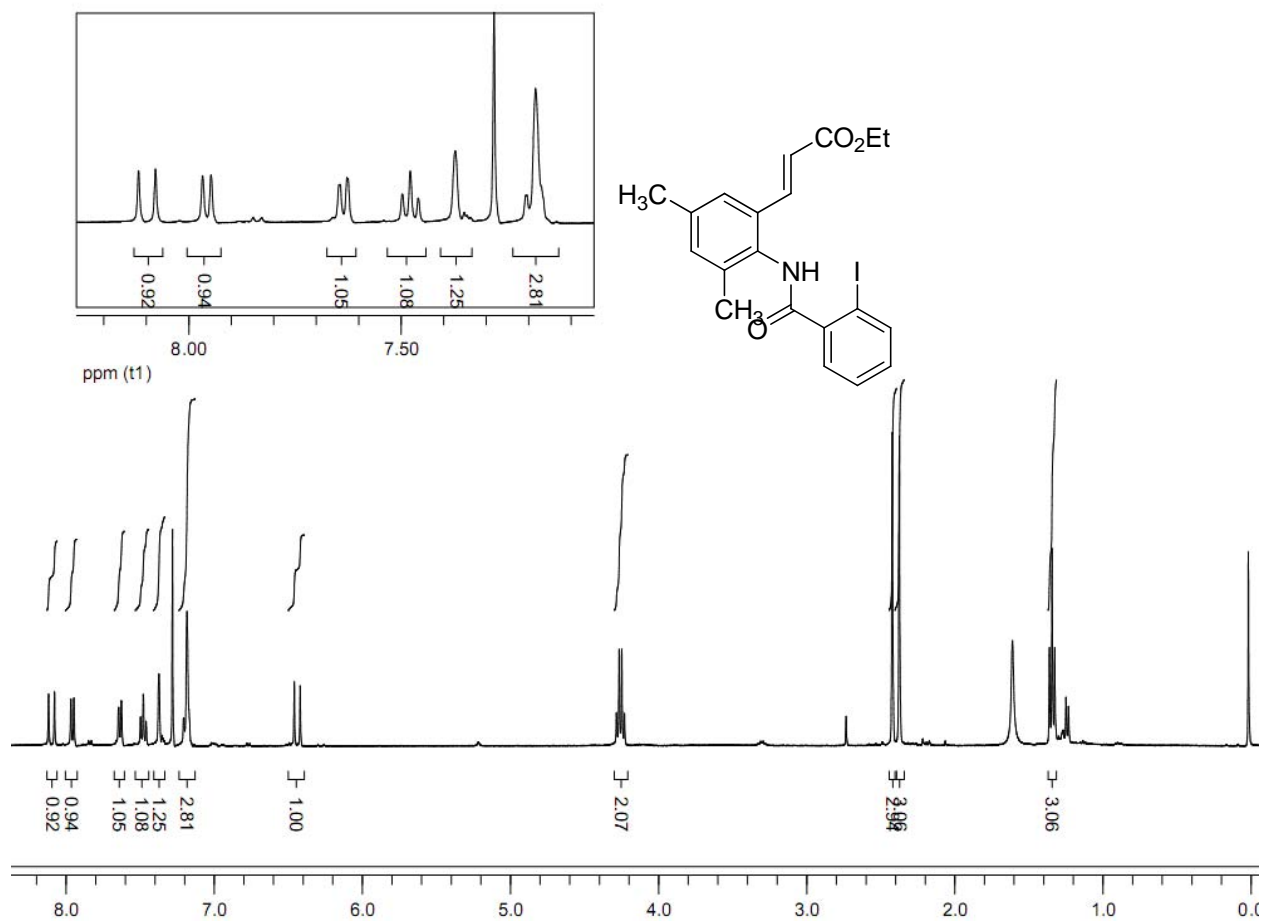

Fig. 26:  $^1\text{H}$  NMR spectra of compound **1j** ( $\text{CDCl}_3$ , 400 MHz)

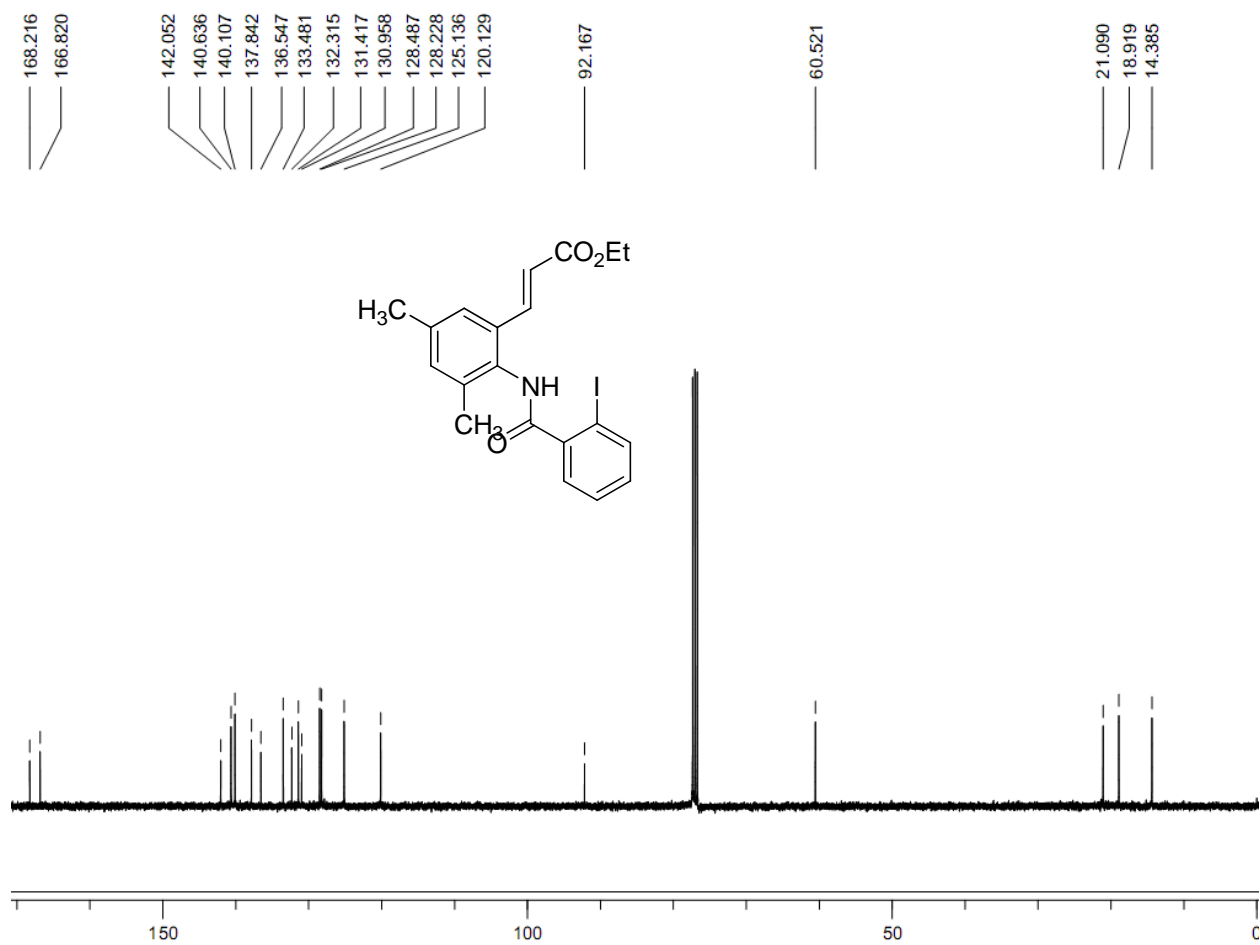

Fig. 27:  $^{13}\text{C}$  NMR spectra of compound **1j** ( $\text{CDCl}_3$ , 100 MHz)

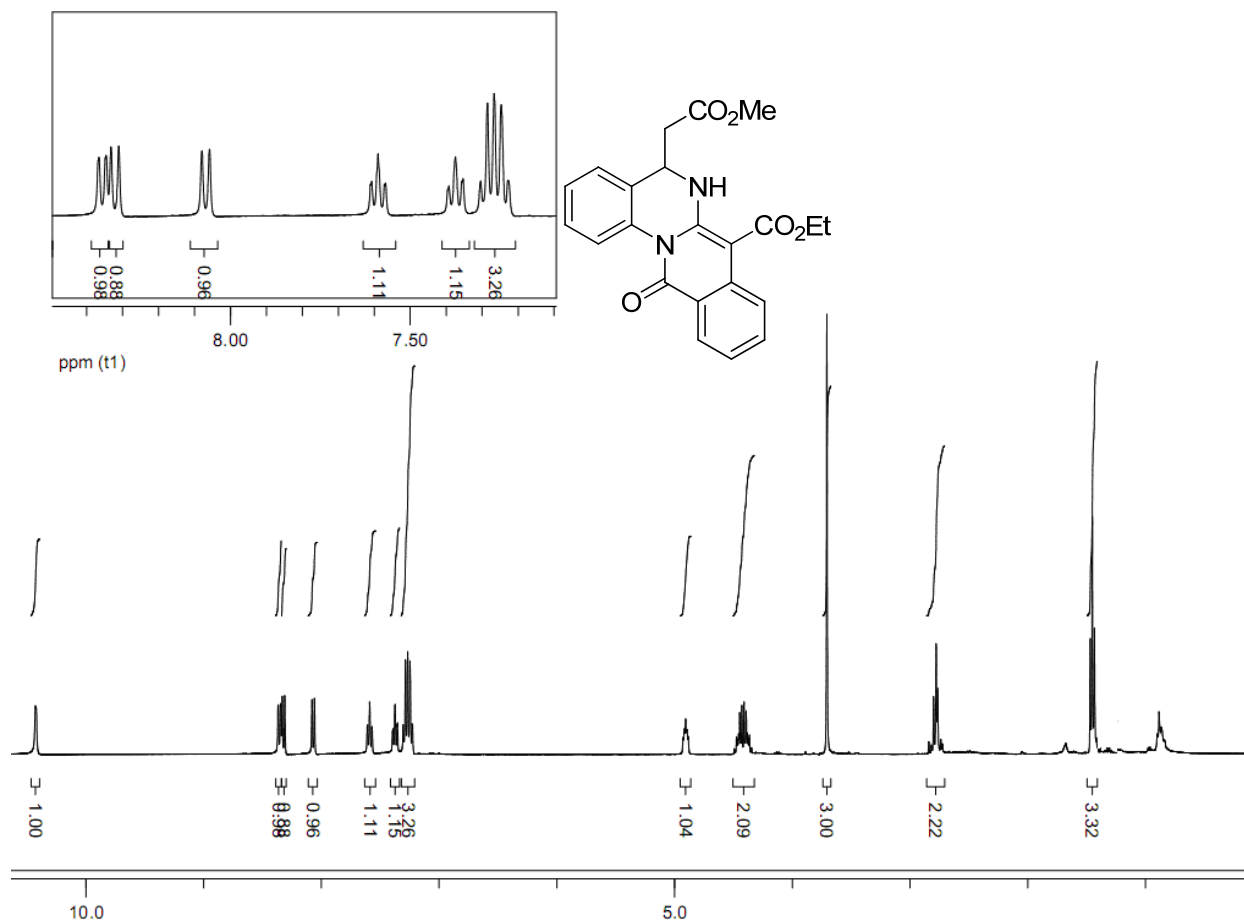

Fig. 28: <sup>1</sup>H NMR spectra of compound **3a** (CDCl<sub>3</sub>, 400 MHz)

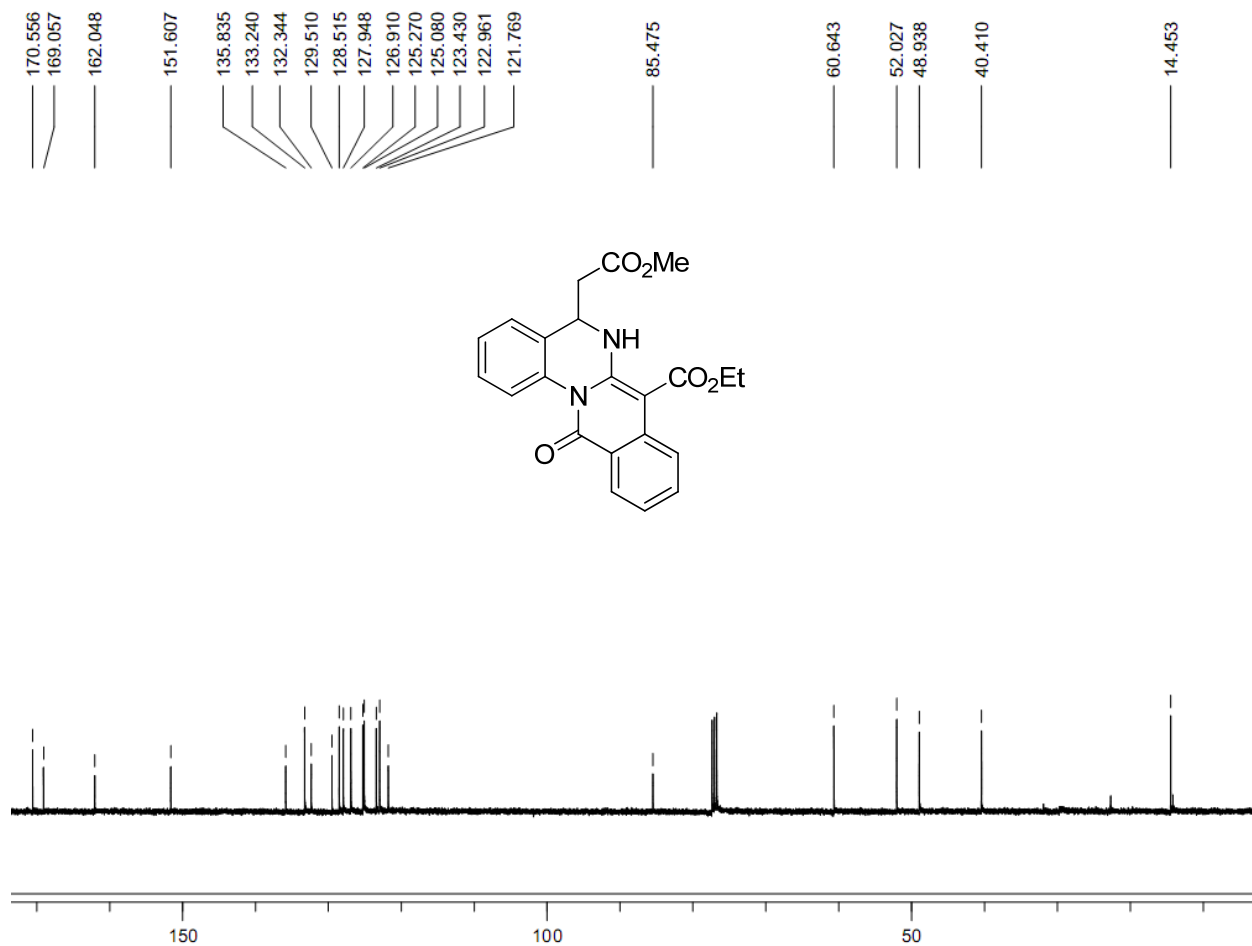

Fig. 29:  $^{13}\text{C}$  NMR spectra of compound **3a** ( $\text{CDCl}_3$ , 100 MHz)

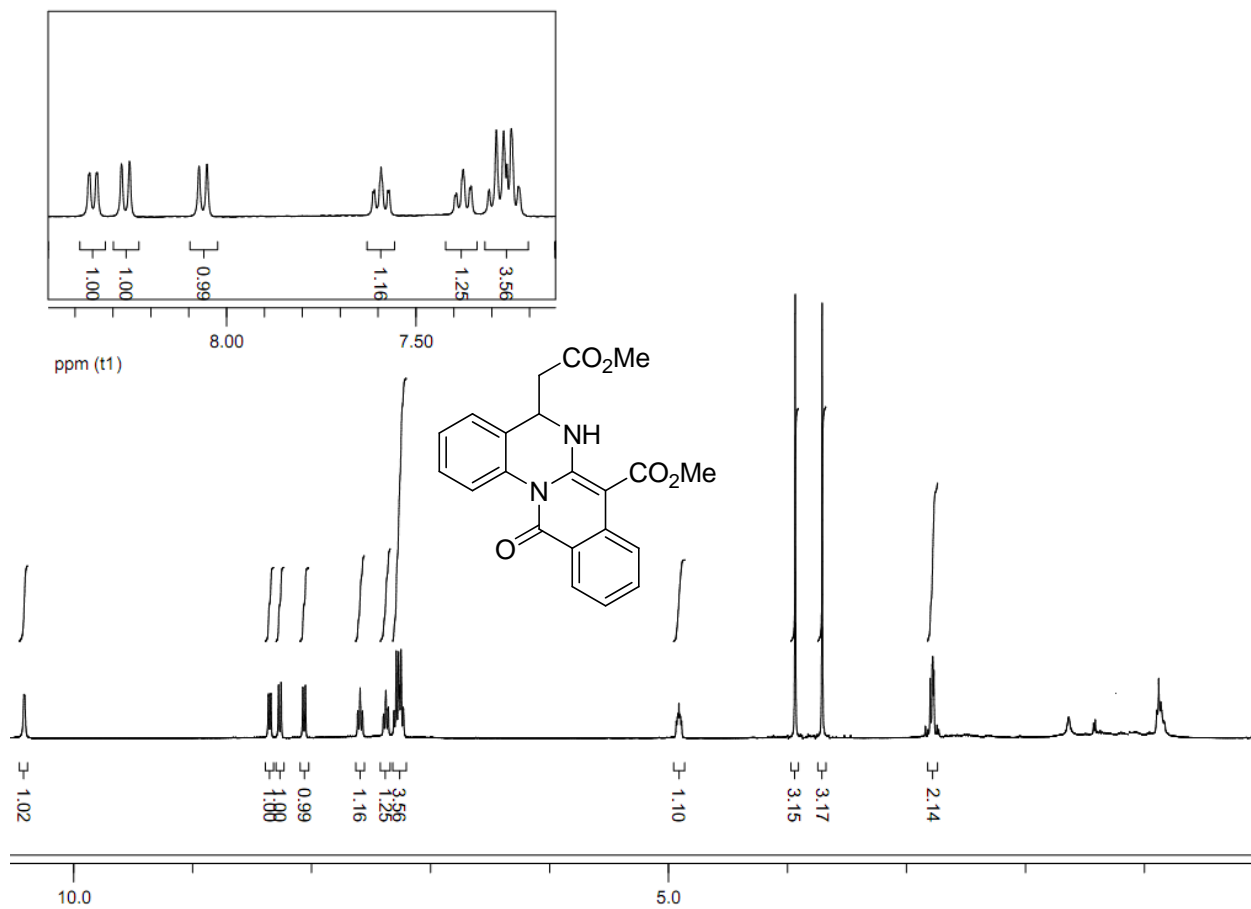

Fig. 30: <sup>1</sup>H NMR spectra of compound **3b** (CDCl<sub>3</sub>, 400 MHz)

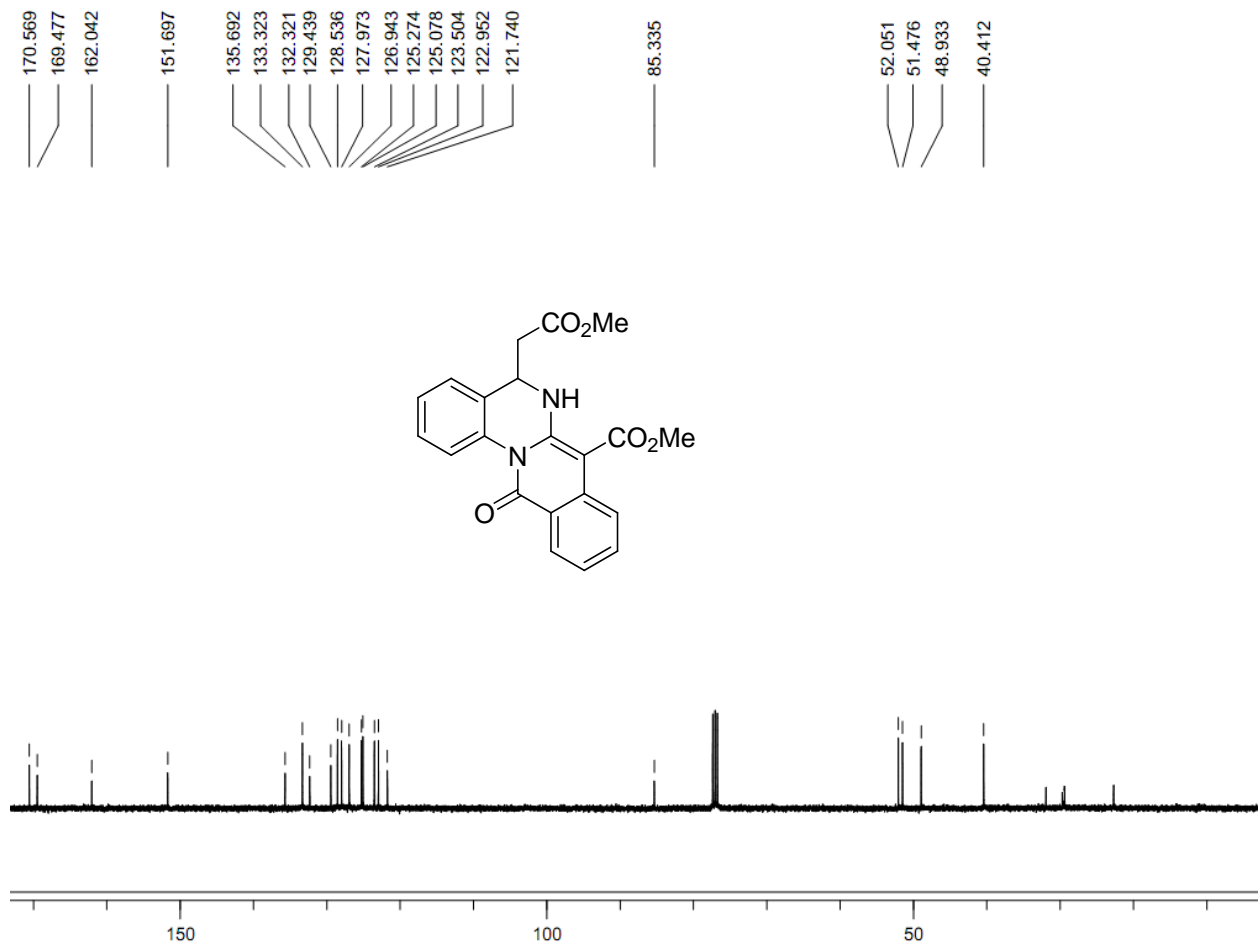

Fig. 31: <sup>13</sup>C NMR spectra of compound **3b** (CDCl<sub>3</sub>, 100 MHz)

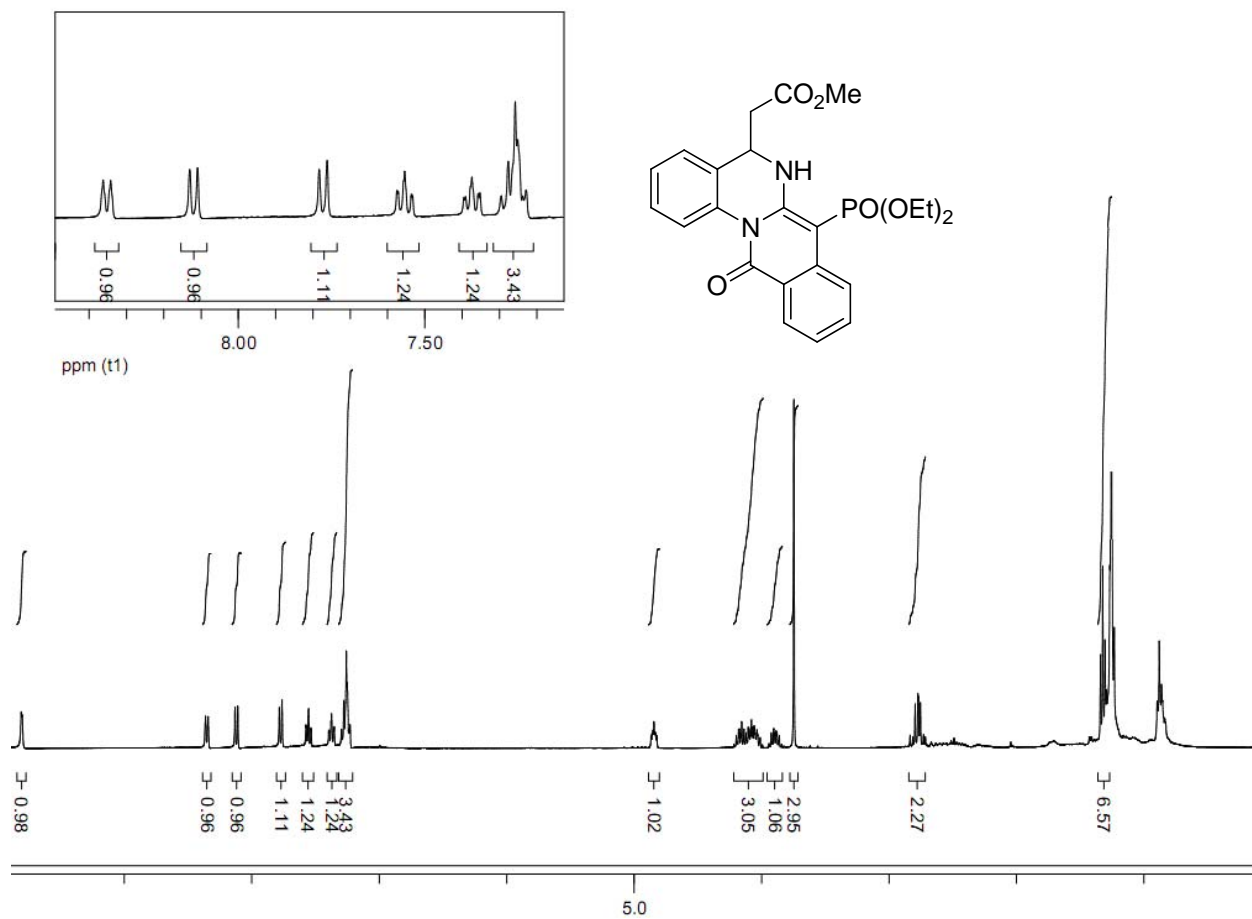

Fig. 32:  $^1\text{H}$  NMR spectra of compound **3c** ( $\text{CDCl}_3$ , 400 MHz)



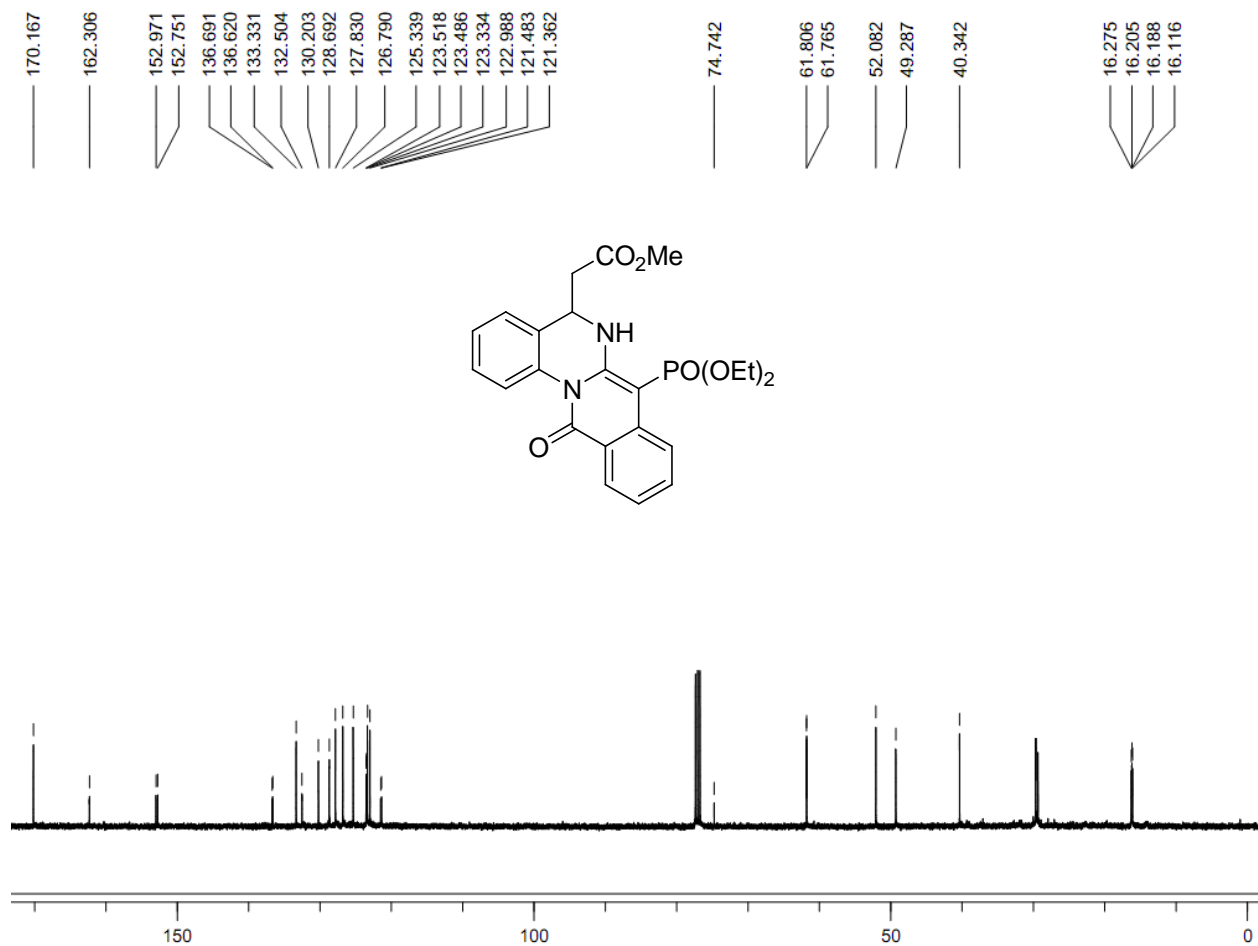

Fig. 33: <sup>13</sup>C NMR spectra of compound **3c** (CDCl<sub>3</sub>, 100 MHz)

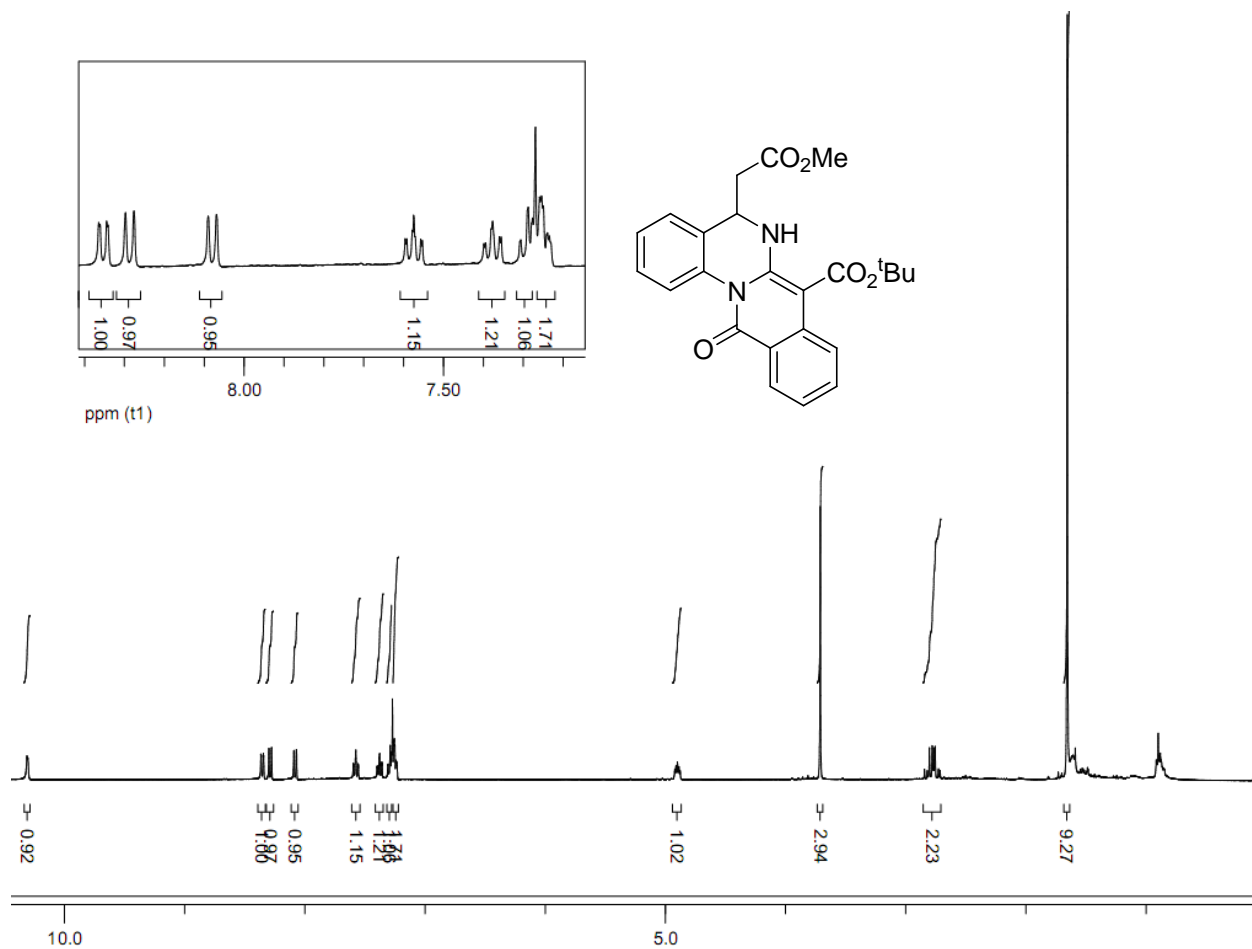

Fig. 34: <sup>1</sup>H NMR spectra of compound **3d** (CDCl<sub>3</sub>, 400 MHz)

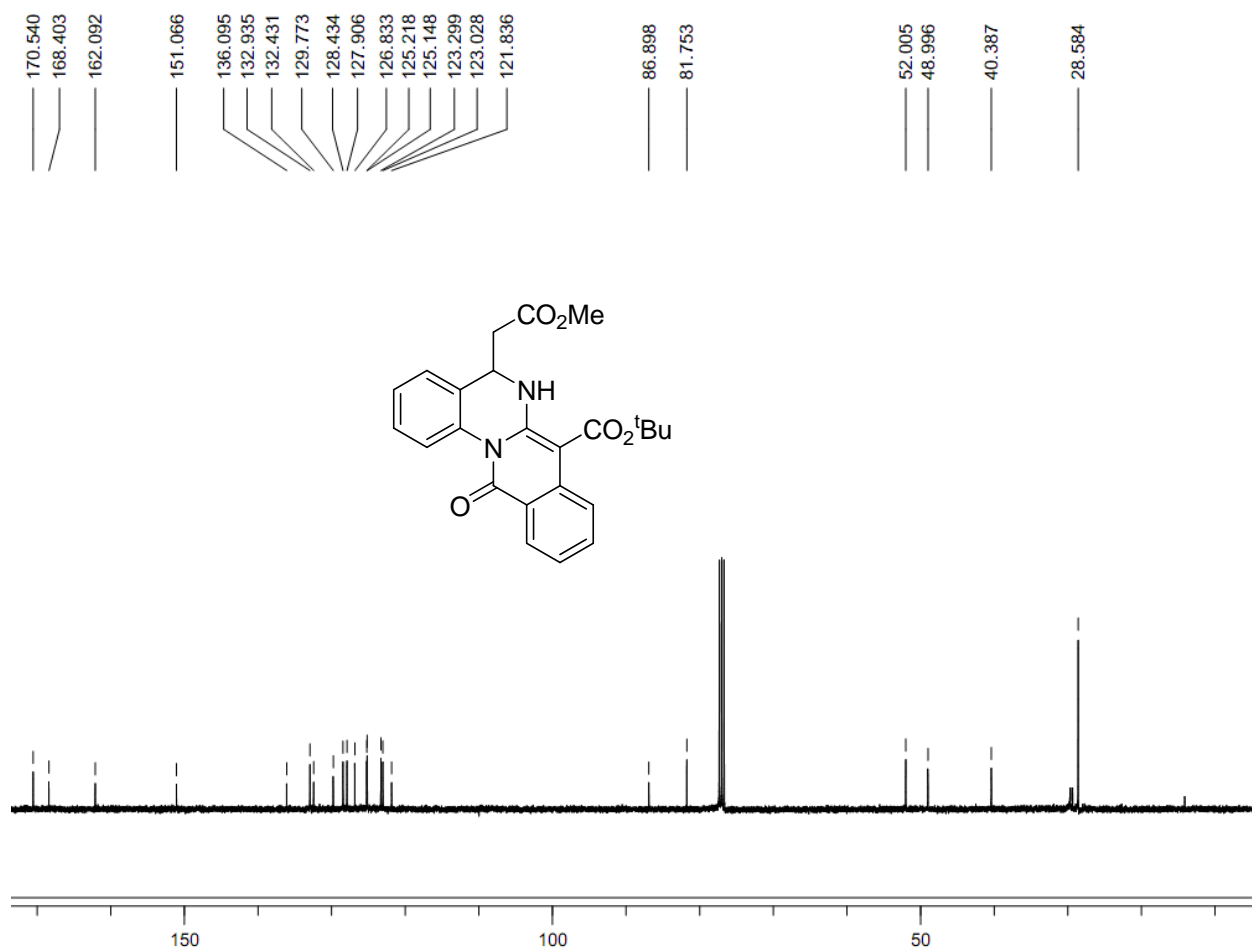

Fig. 35:  $^{13}\text{C}$  NMR spectra of compound **3d** ( $\text{CDCl}_3$ , 100 MHz)

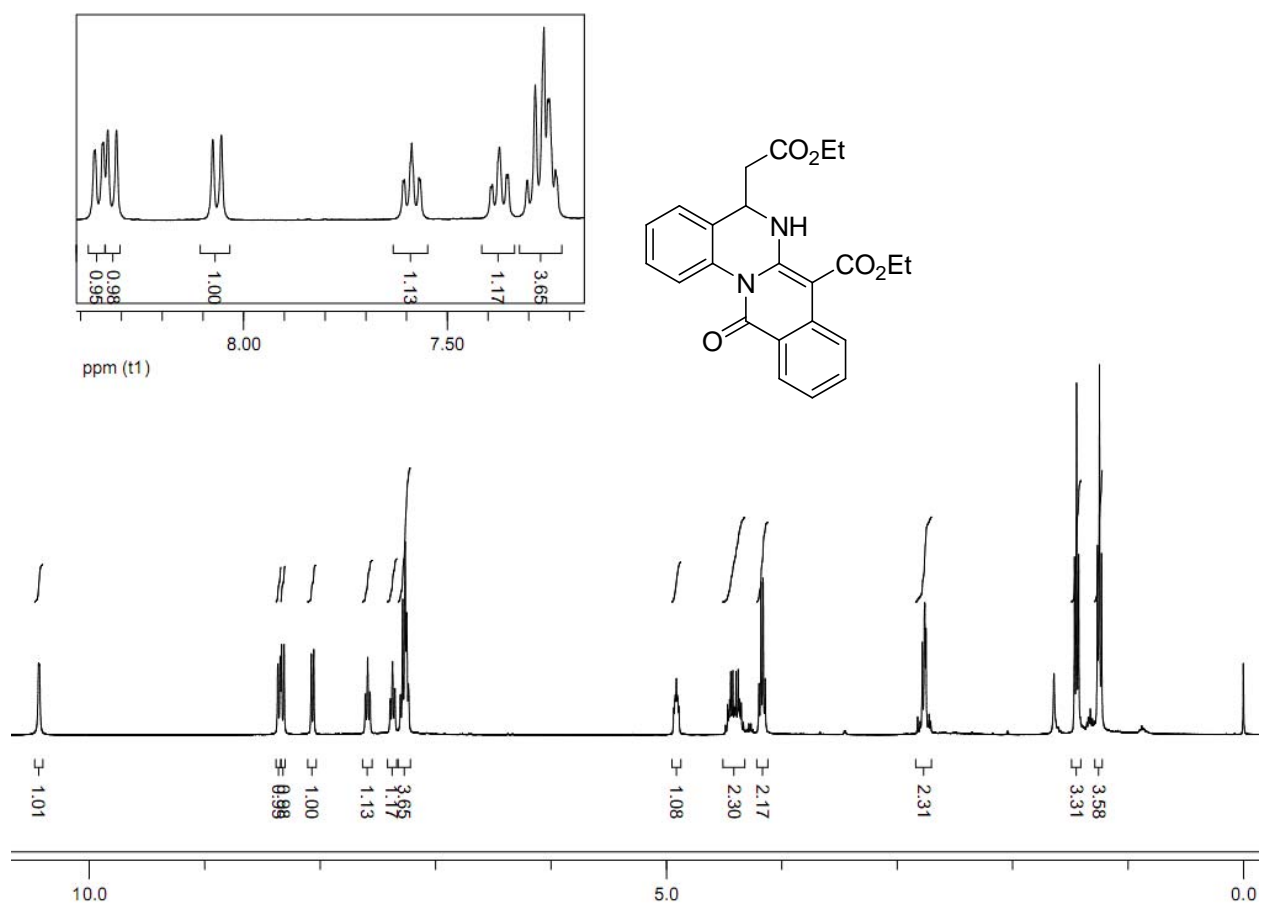

Fig. 36: <sup>1</sup>H NMR spectra of compound **3e** (CDCl<sub>3</sub>, 400 MHz)

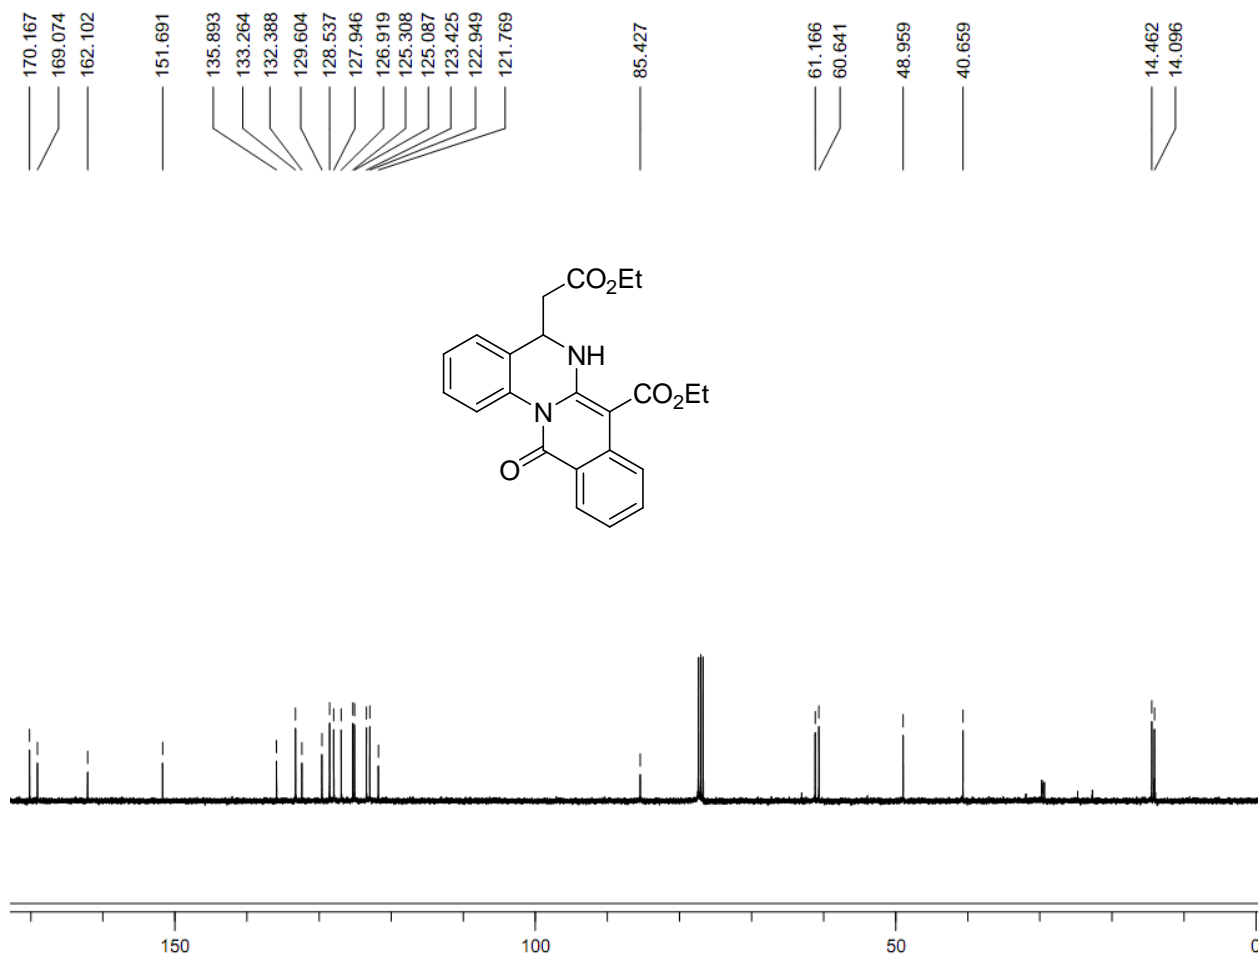

Fig. 37:  $^{13}\text{C}$  NMR spectra of compound **3e** ( $\text{CDCl}_3$ , 100 MHz)

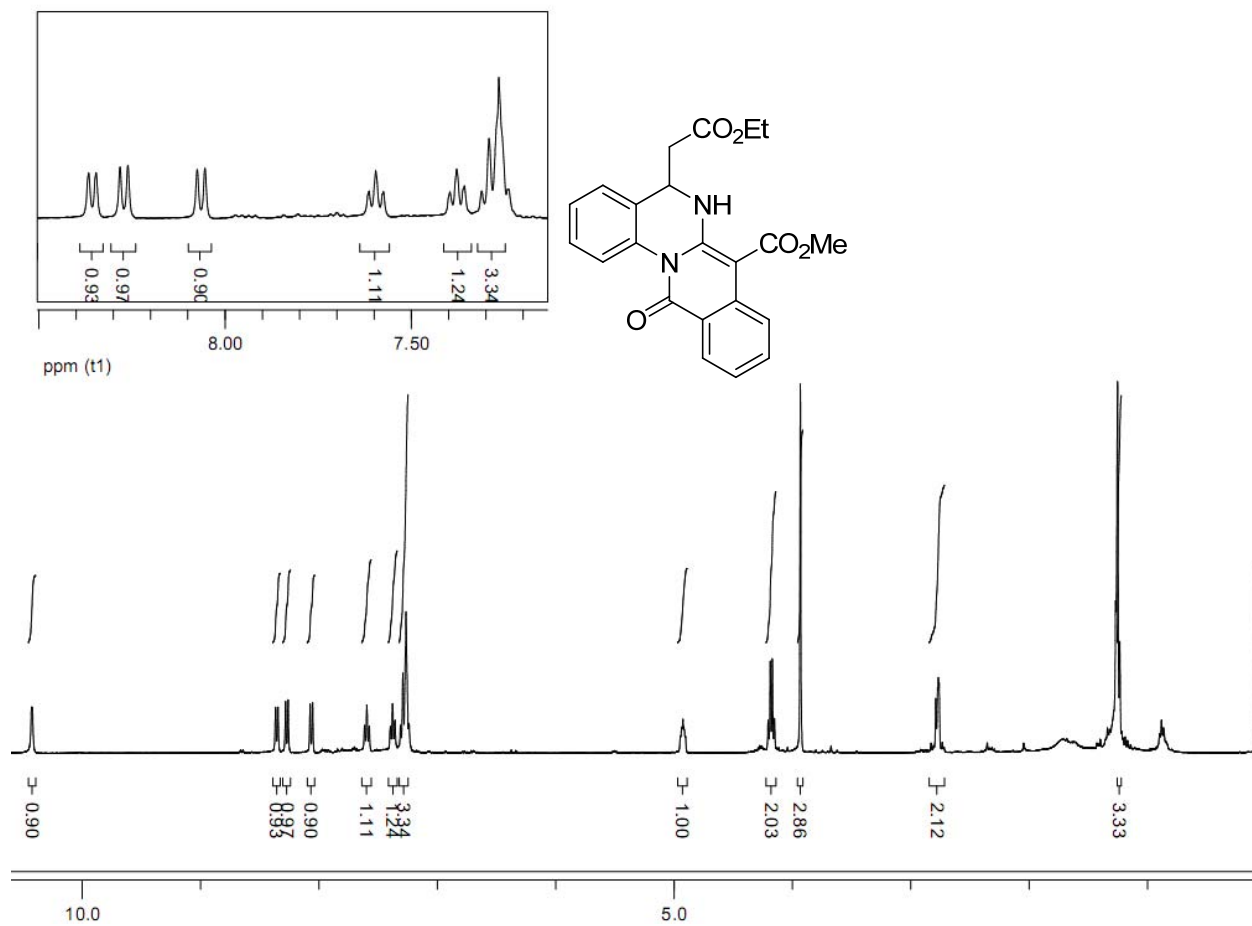

Fig. 38:  $^1\text{H NMR}$  spectra of compound **3f** (CDCl<sub>3</sub>, 400 MHz)

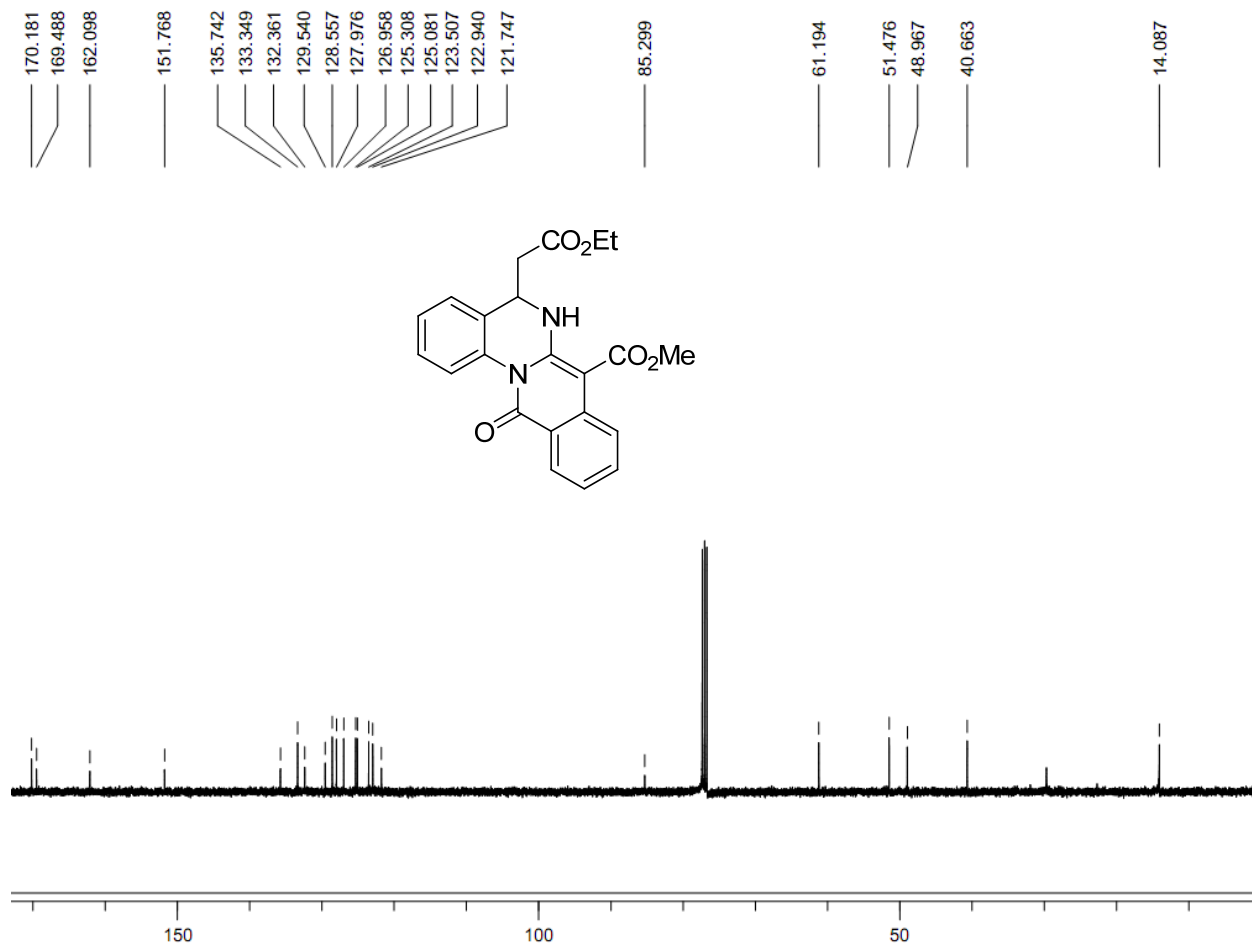

Fig. 39: <sup>13</sup>C NMR spectra of compound **3f** (CDCl<sub>3</sub>, 100 MHz)

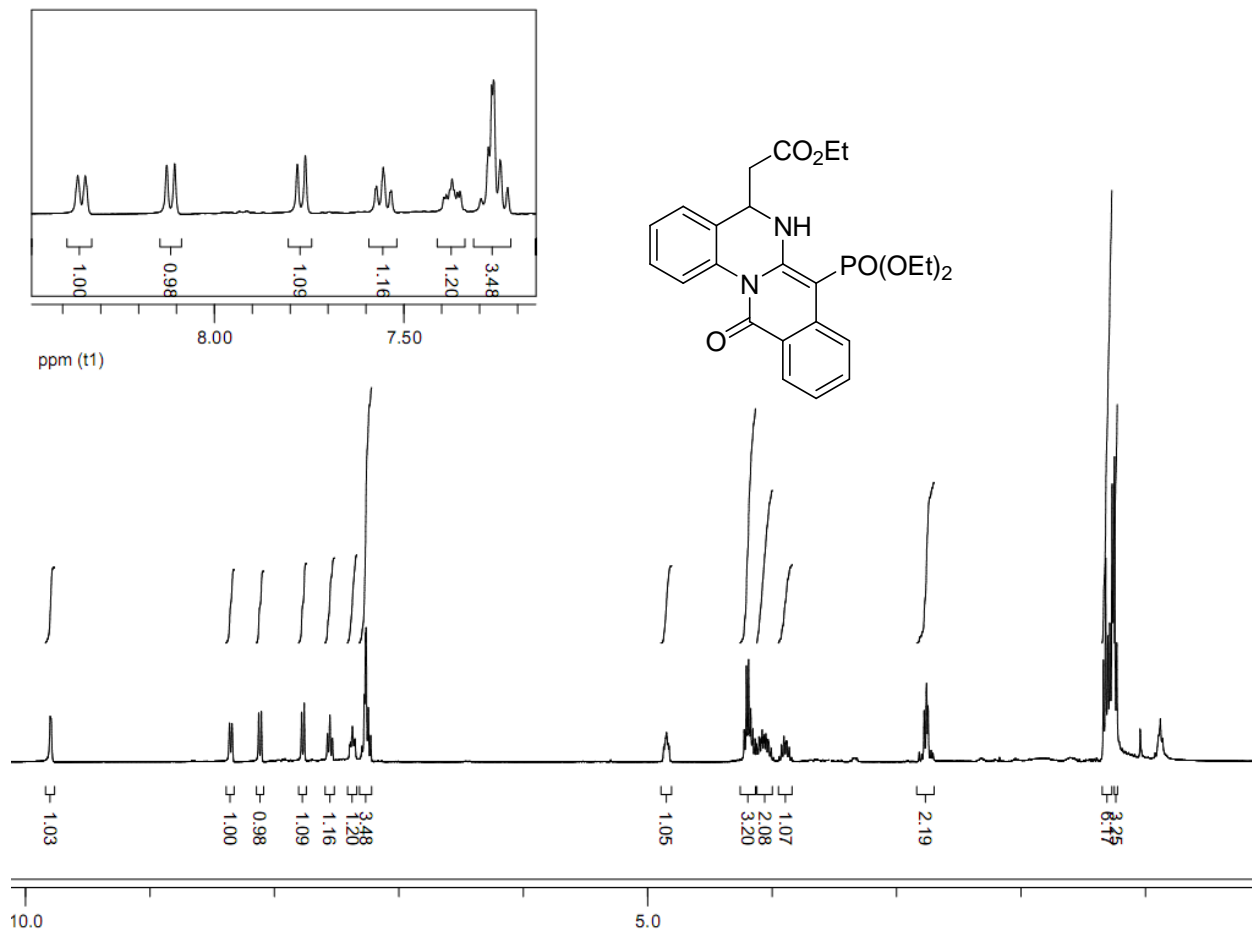

Fig. 40:  $^1\text{H}$  NMR spectra of compound **3g** ( $\text{CDCl}_3$ , 400 MHz)



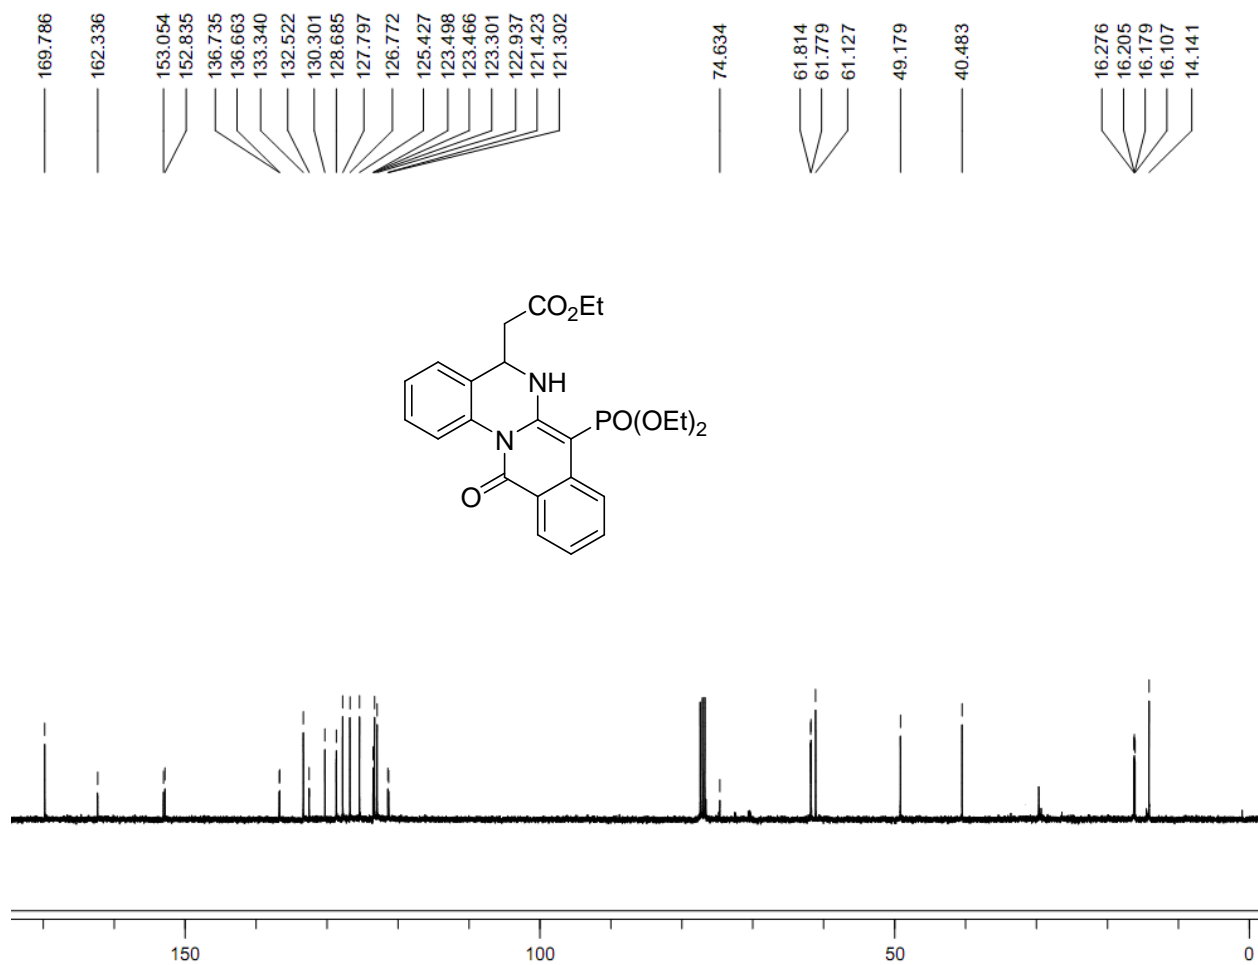

Fig. 41:  $^{13}\text{C}$  NMR spectra of compound **3g** ( $\text{CDCl}_3$ , 100 MHz)

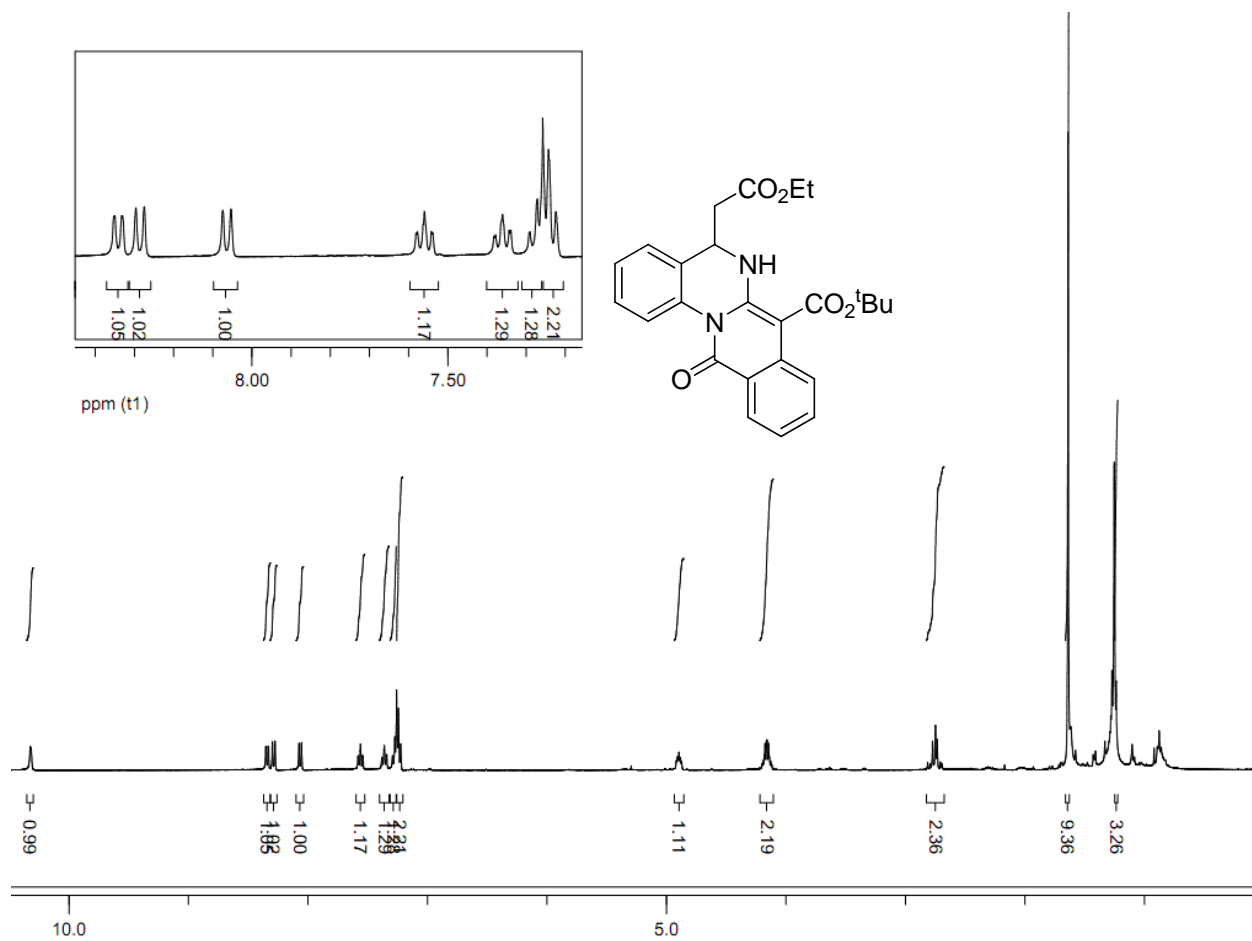

Fig. 42: <sup>1</sup>H NMR spectra of compound **3h** (CDCl<sub>3</sub>, 400 MHz)

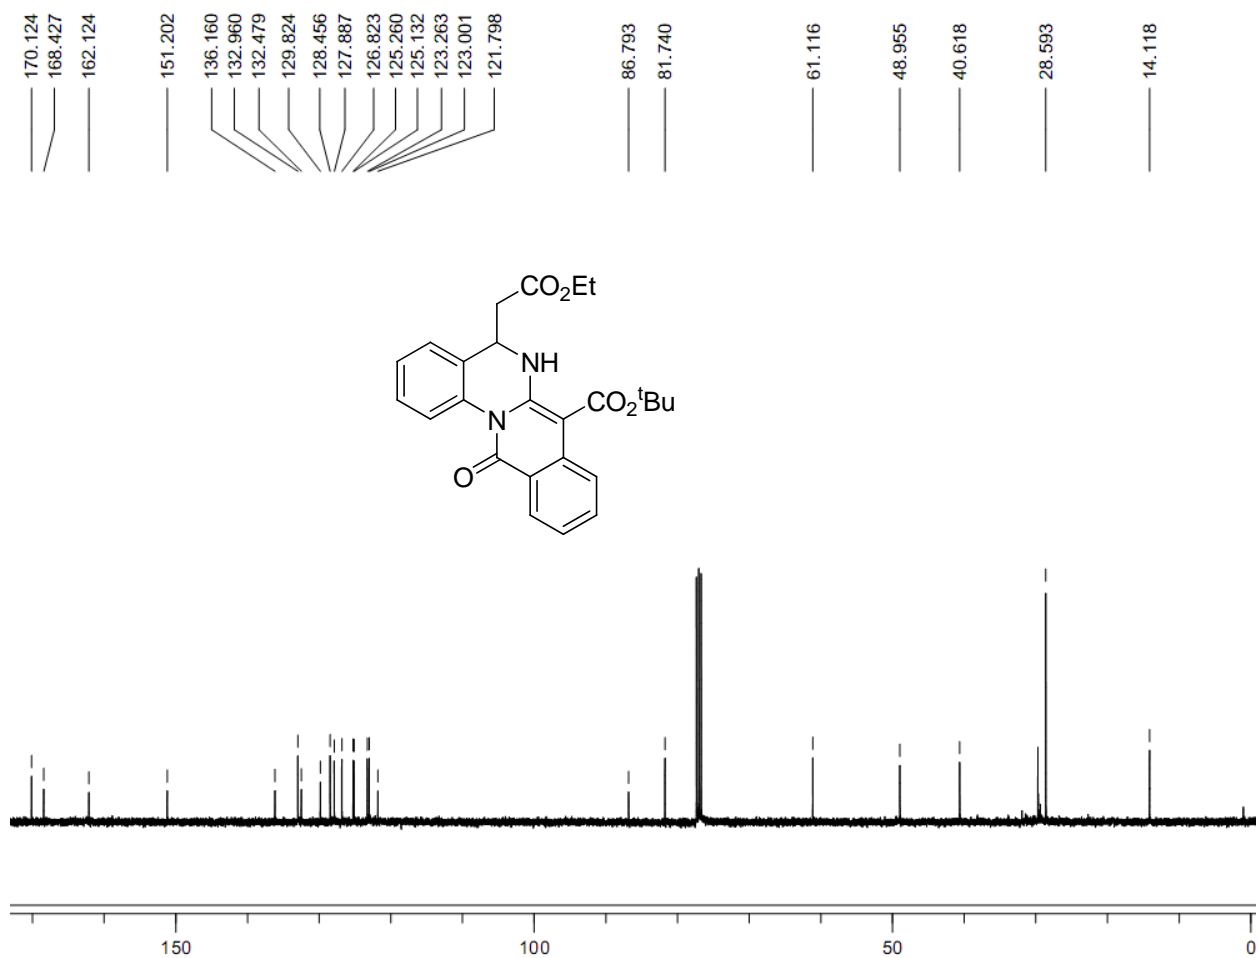

Fig. 43:  $^{13}\text{C}$  NMR spectra of compound **3h** ( $\text{CDCl}_3$ , 100 MHz)

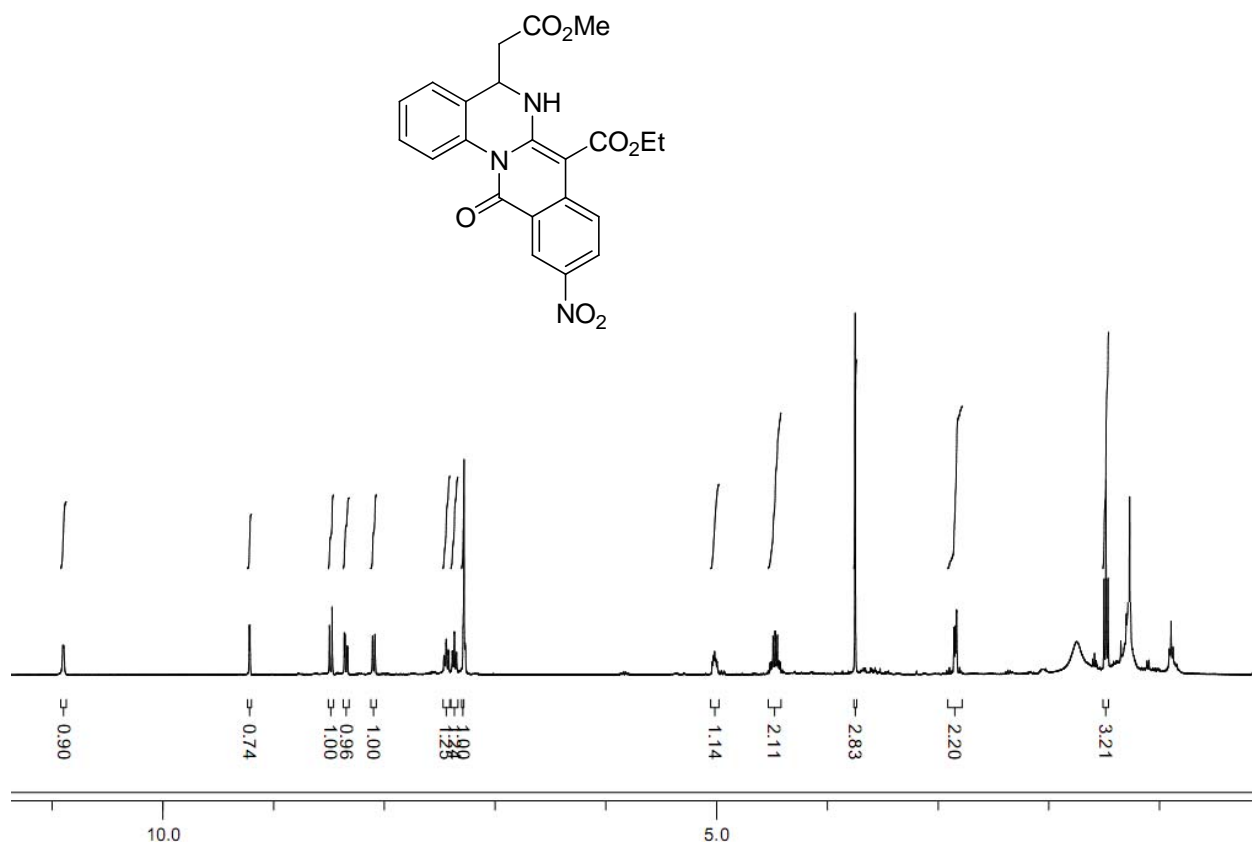

Fig. 44: <sup>1</sup>H NMR spectra of compound **3i** (CDCl<sub>3</sub>, 400 MHz)

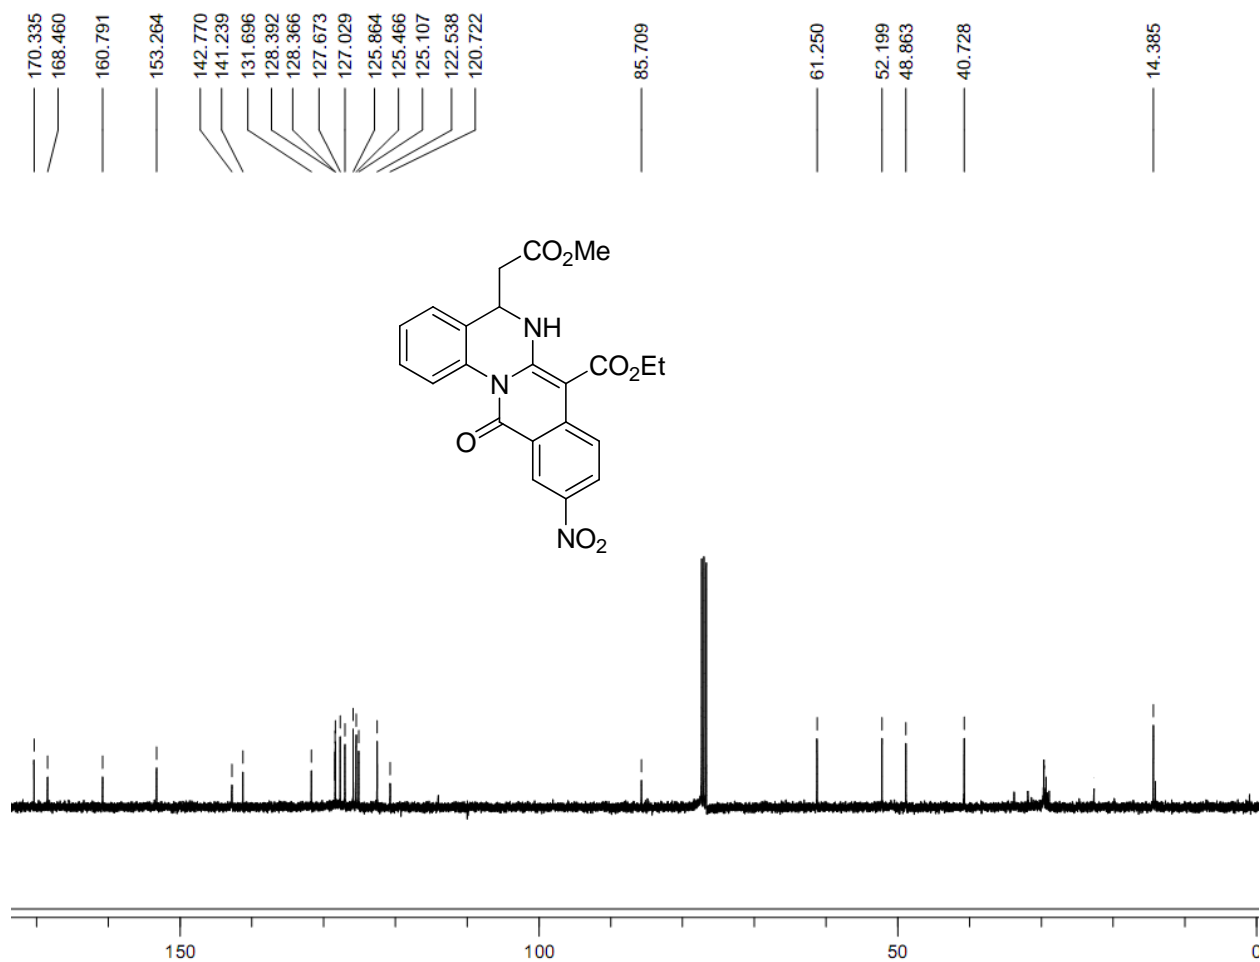

Fig. 45:  $^{13}\text{C}$  NMR spectra of compound **3i** ( $\text{CDCl}_3$ , 100 MHz)

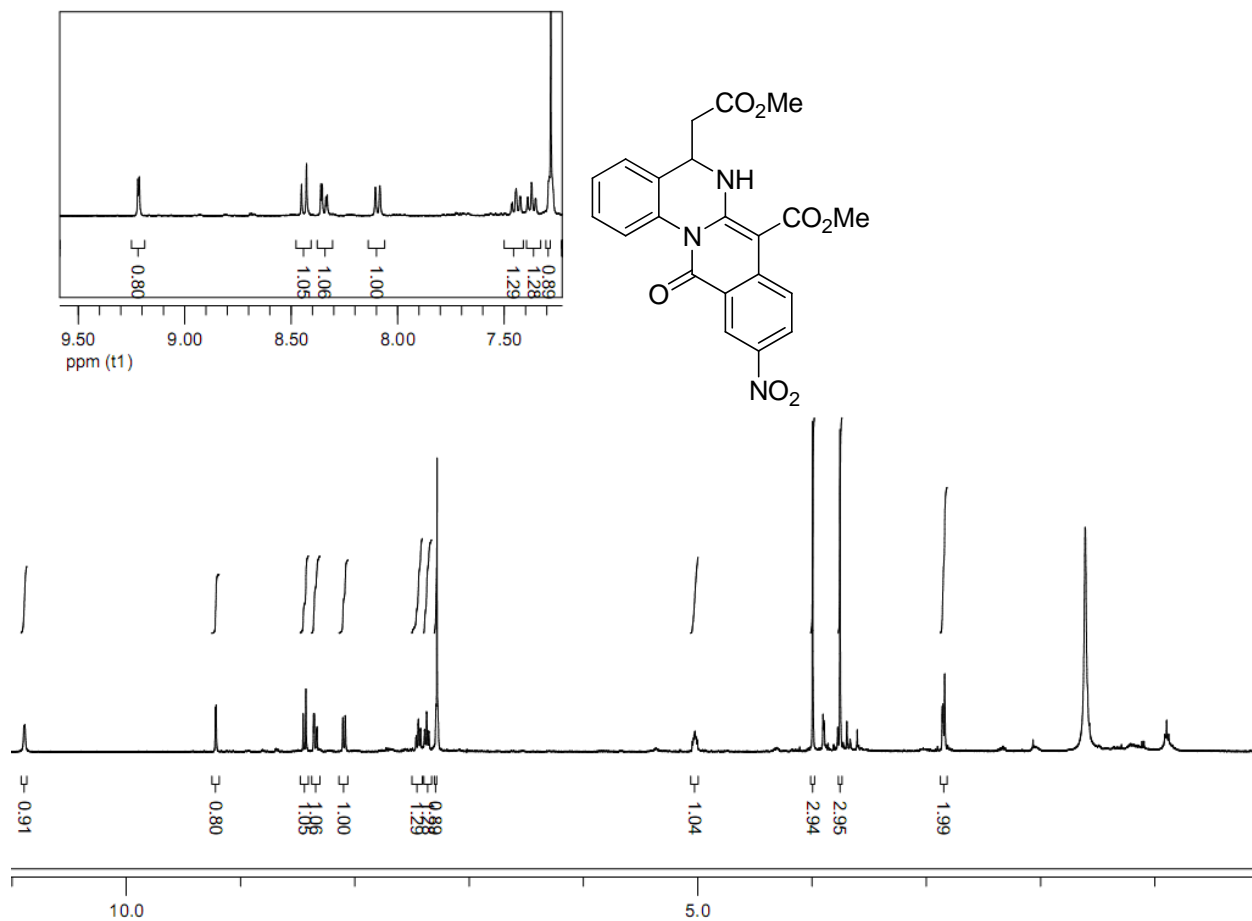

Fig. 46: <sup>1</sup>H NMR spectra of compound **3j** (CDCl<sub>3</sub>, 400 MHz)

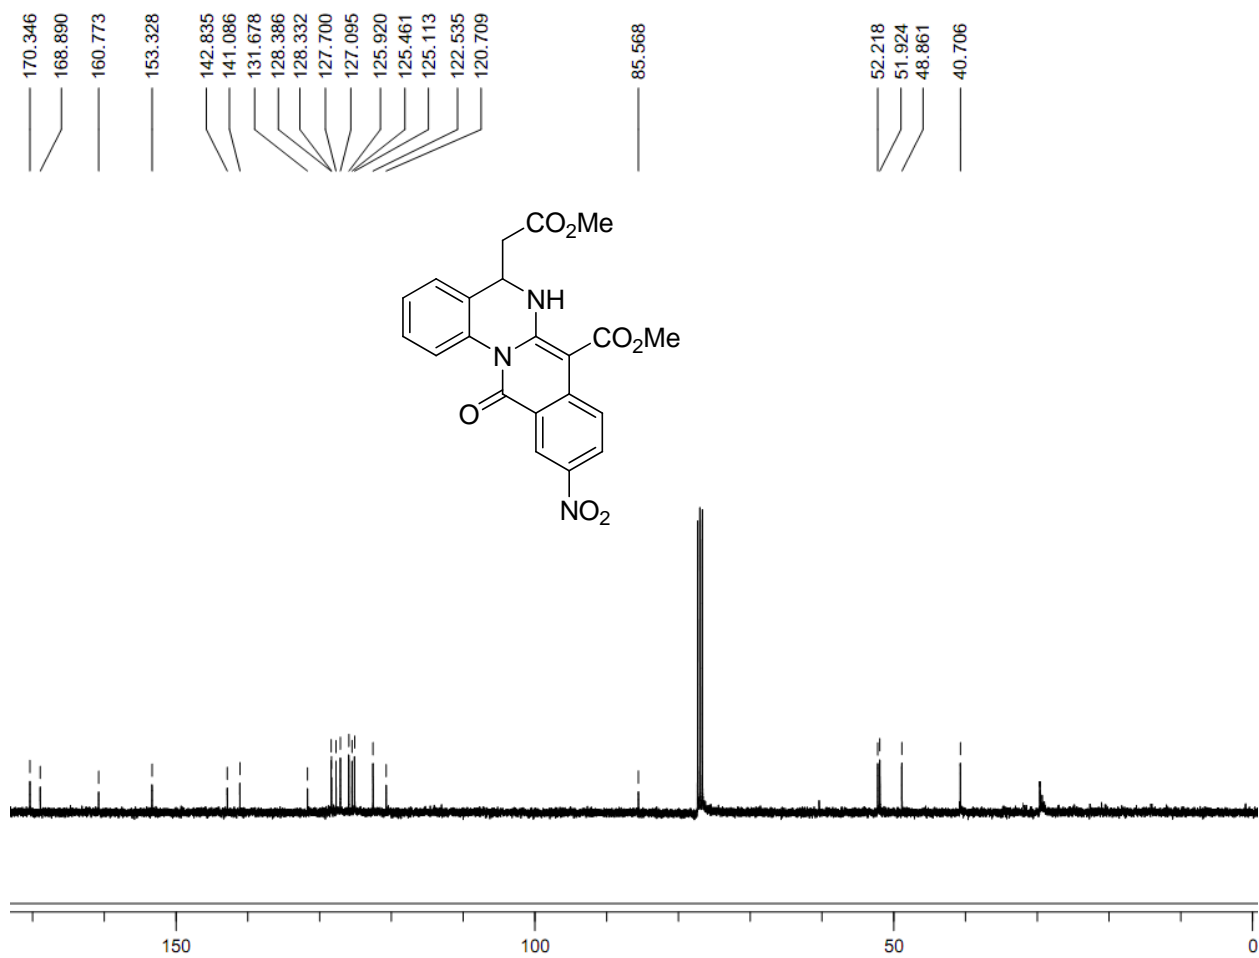

Fig. 47: <sup>13</sup>C NMR spectra of compound **3j** (CDCl<sub>3</sub>, 100 MHz)

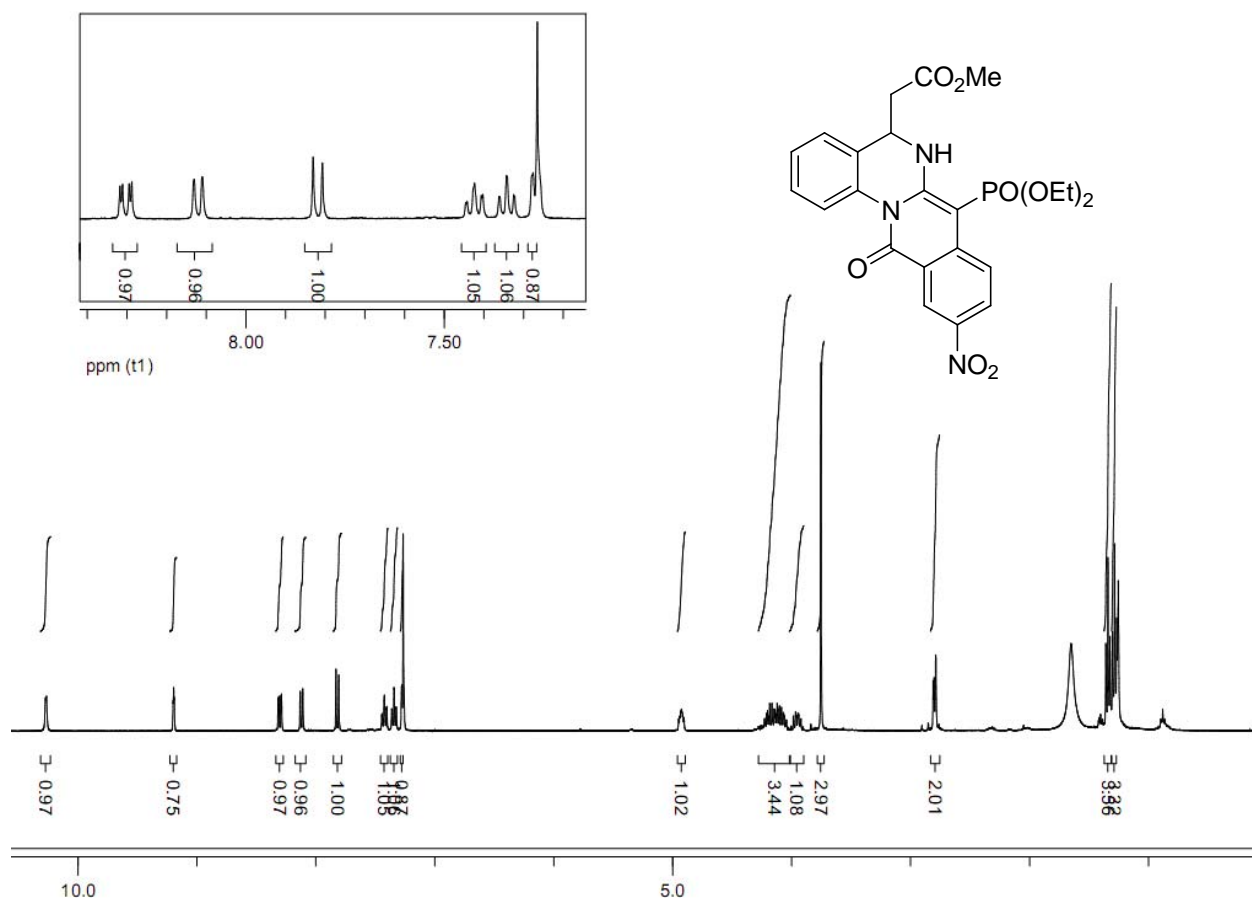

Fig. 48: <sup>1</sup>H NMR spectra of compound **3k** (CDCl<sub>3</sub>, 400 MHz)



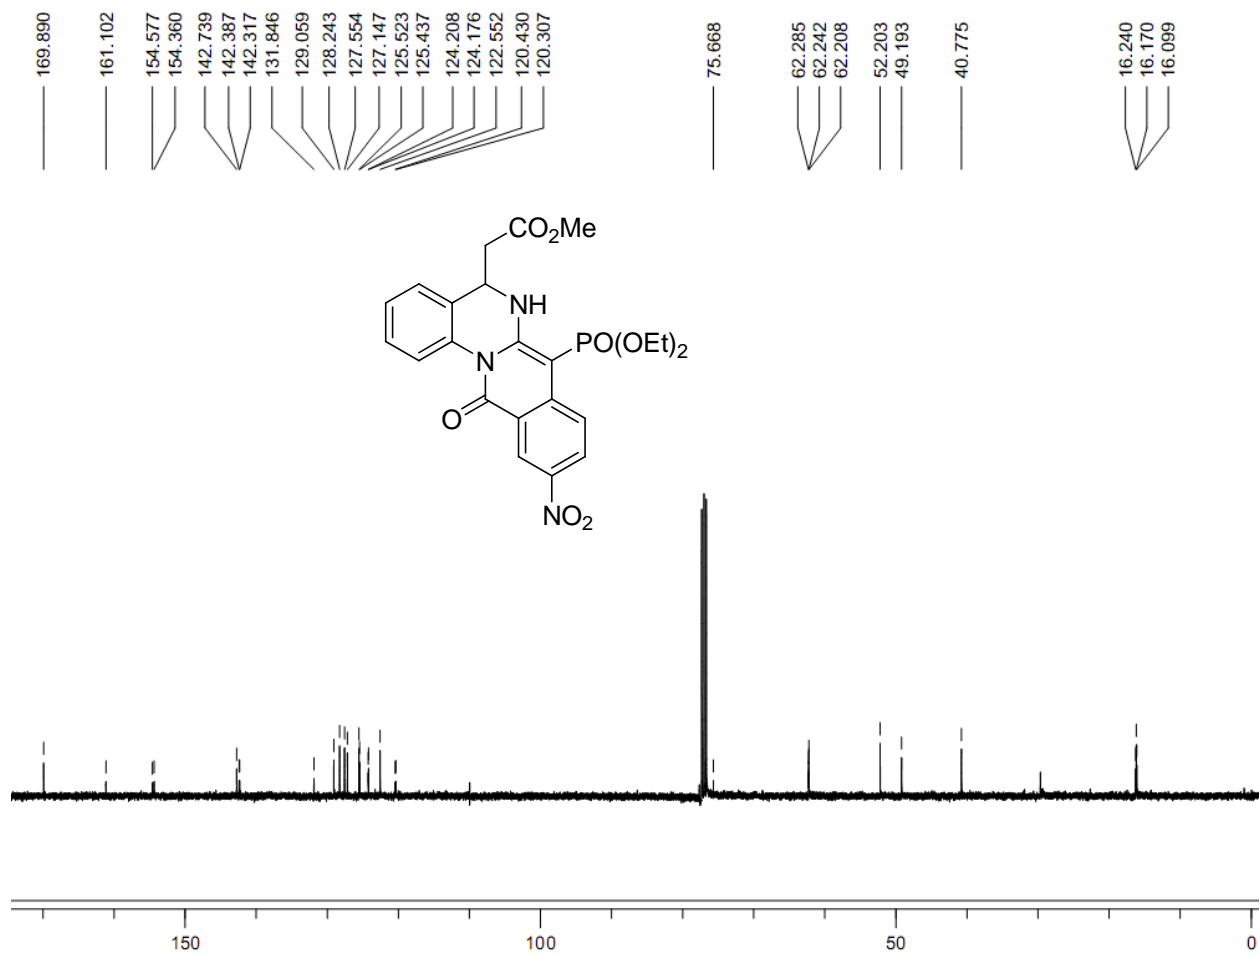

Fig. 49: <sup>13</sup>C NMR spectra of compound **3k** (CDCl<sub>3</sub>, 100 MHz)

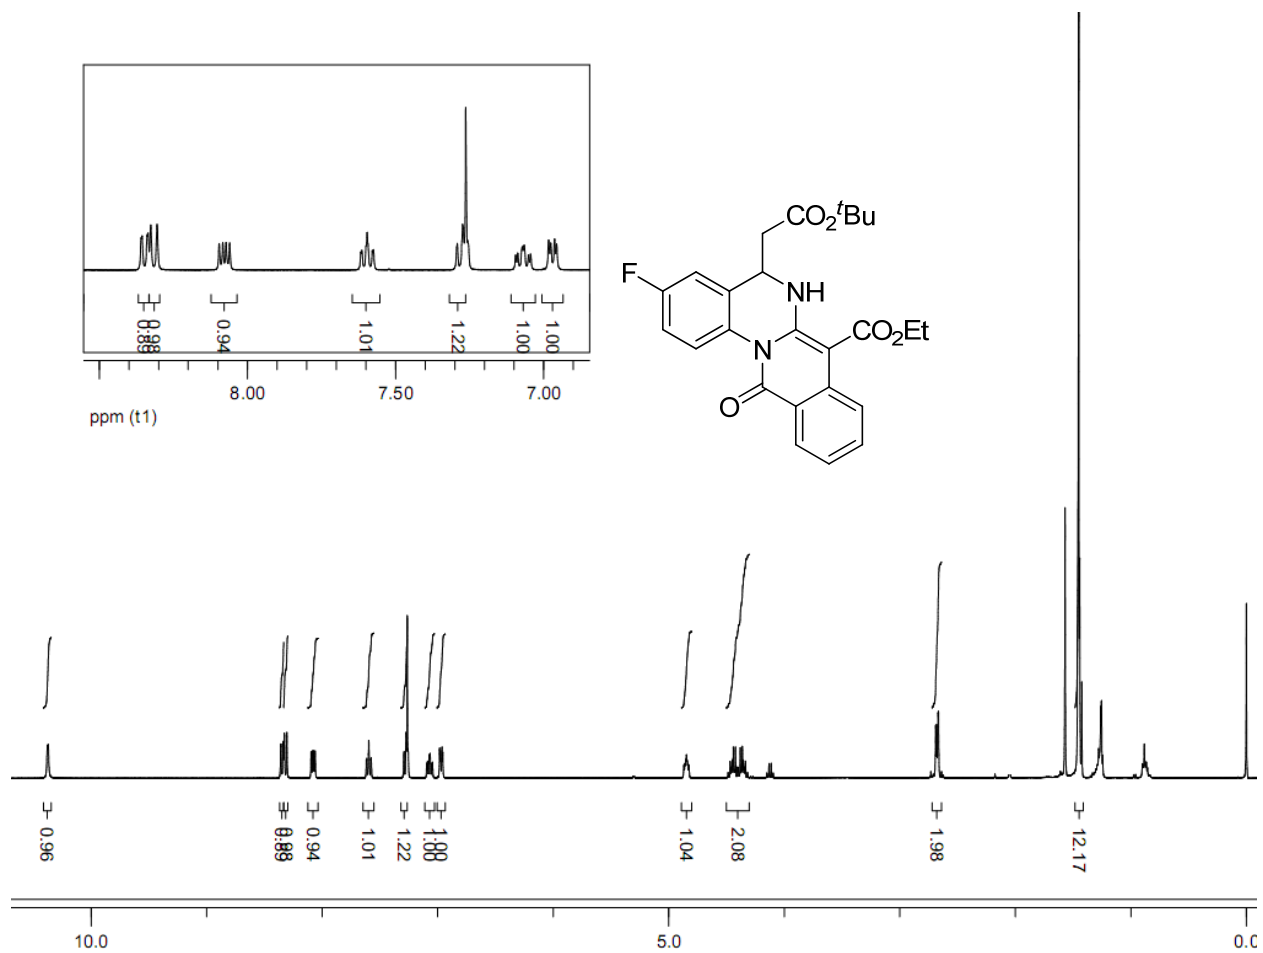

Fig. 50: <sup>1</sup>H NMR spectra of compound **3I** (CDCl<sub>3</sub>, 400 MHz)

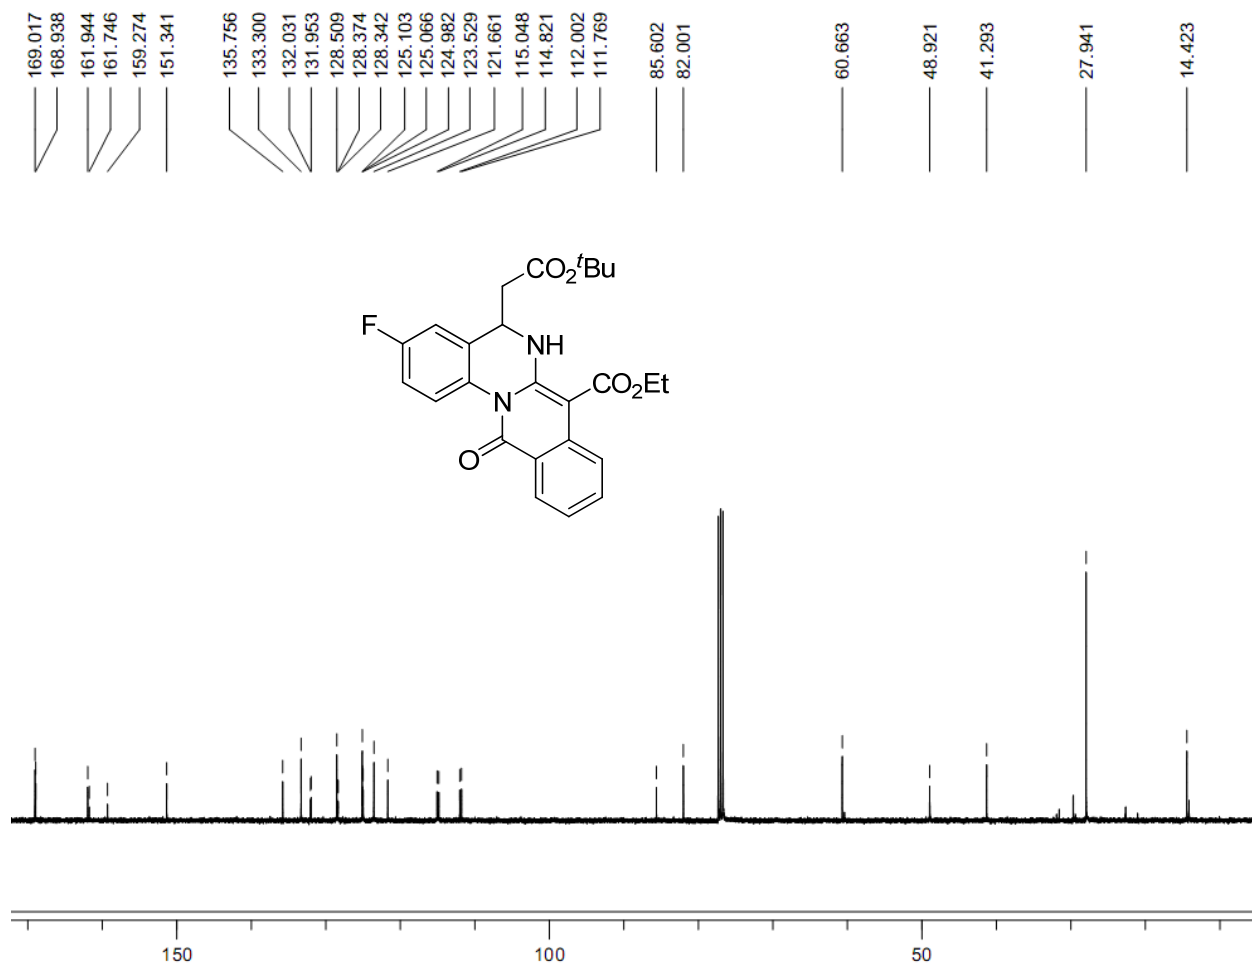

Fig. 51: <sup>13</sup>C NMR spectra of compound **31** (CDCl<sub>3</sub>, 100 MHz)

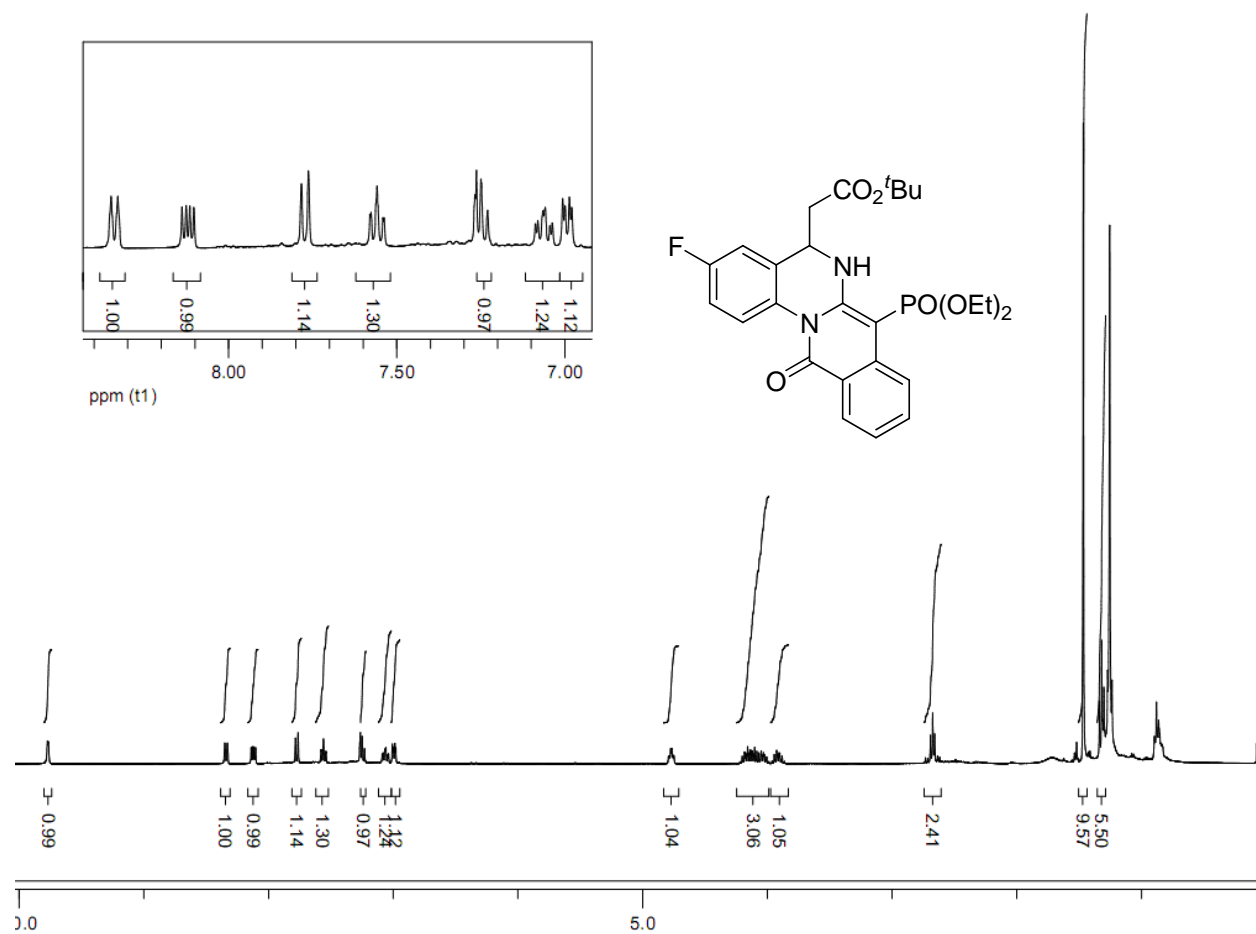

Fig. 52: <sup>1</sup>H NMR spectra of compound **3m** (CDCl<sub>3</sub>, 400 MHz)



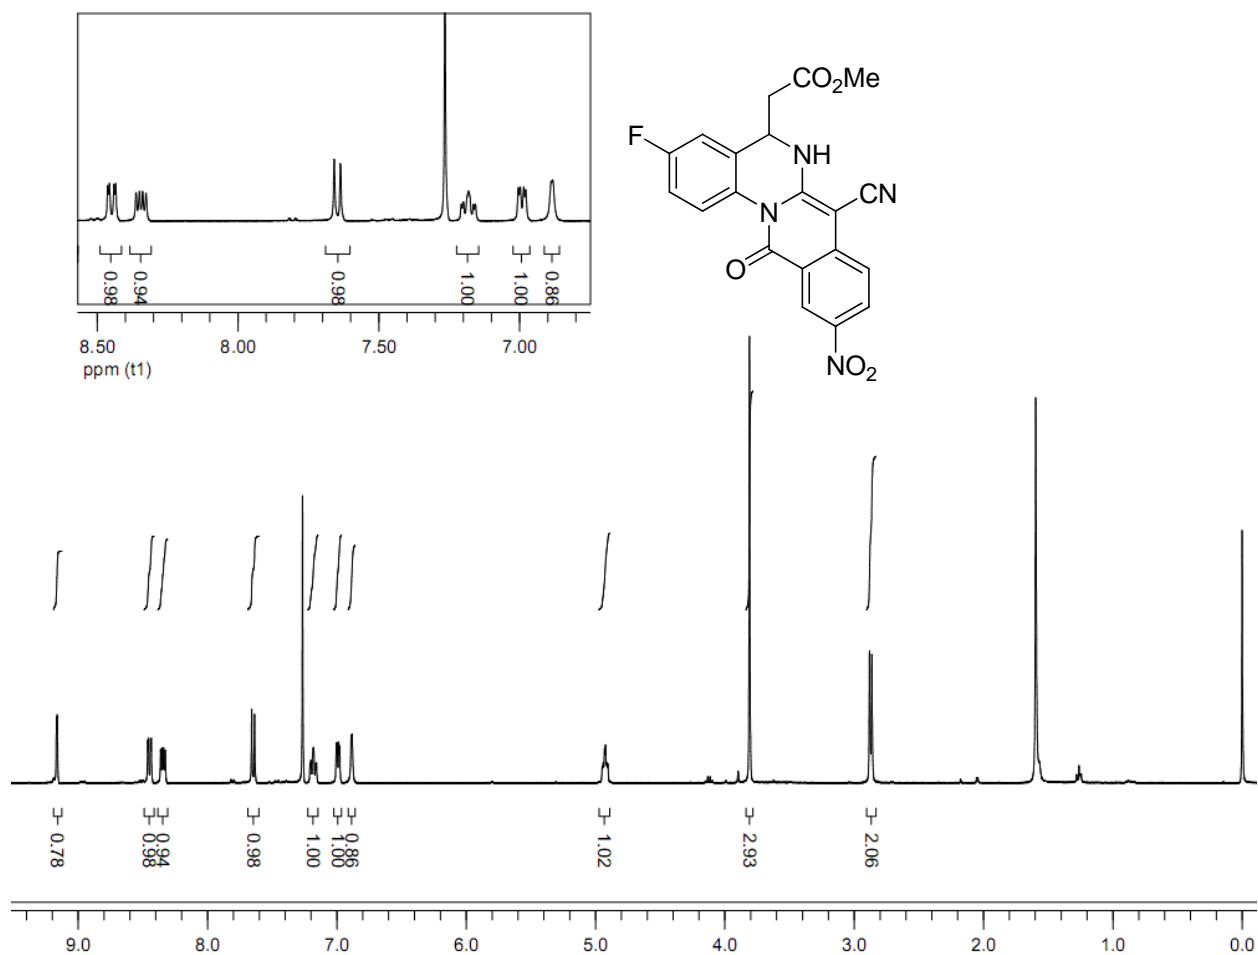

Fig. 54:  $^1\text{H}$  NMR spectra of compound **3n** ( $\text{CDCl}_3$ , 400 MHz)

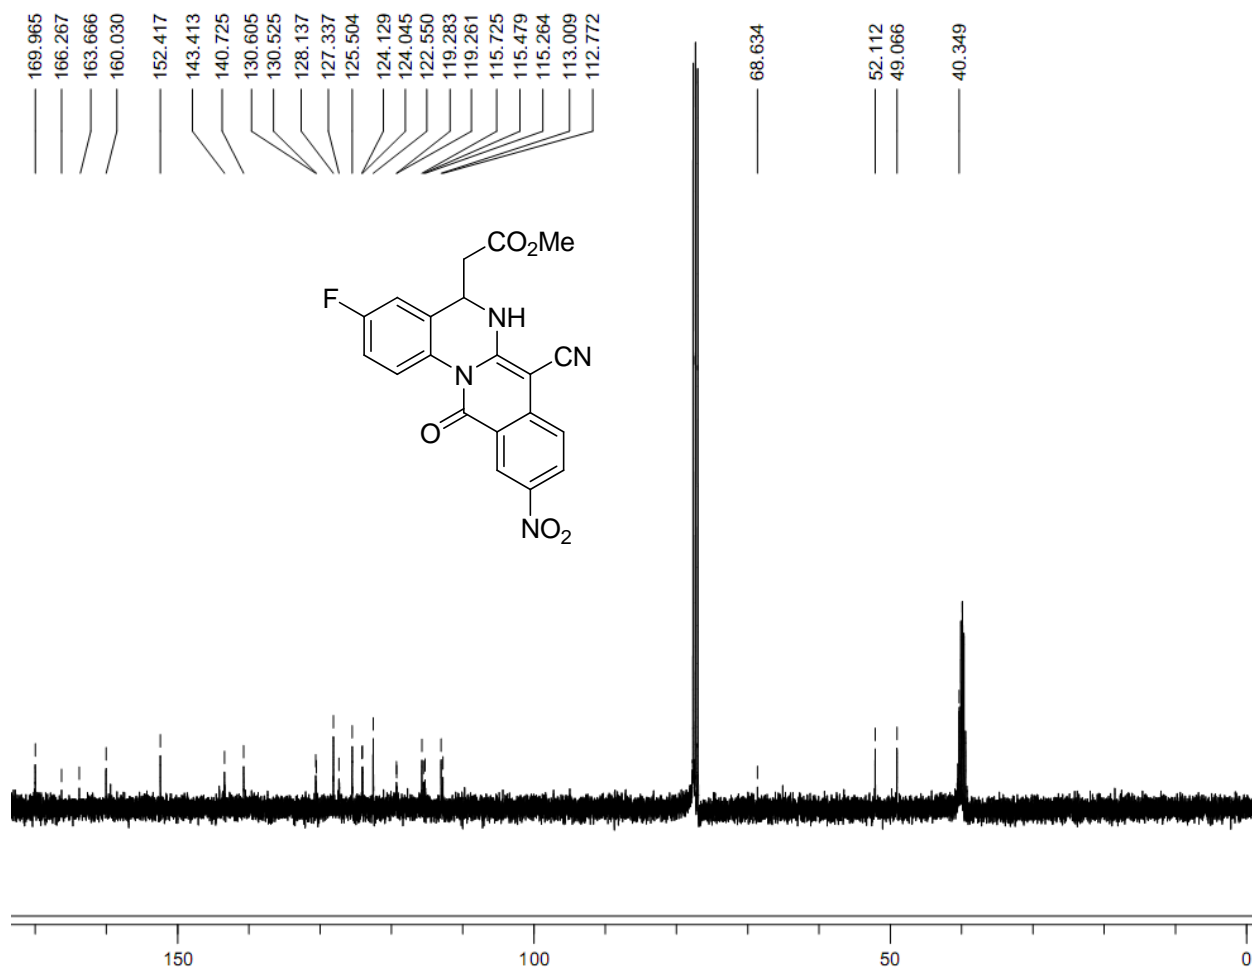

Fig. 55: <sup>13</sup>C NMR spectra of compound **3n** (CDCl<sub>3</sub> + 1 drop DMSO-*d*<sub>6</sub>, 100 MHz)

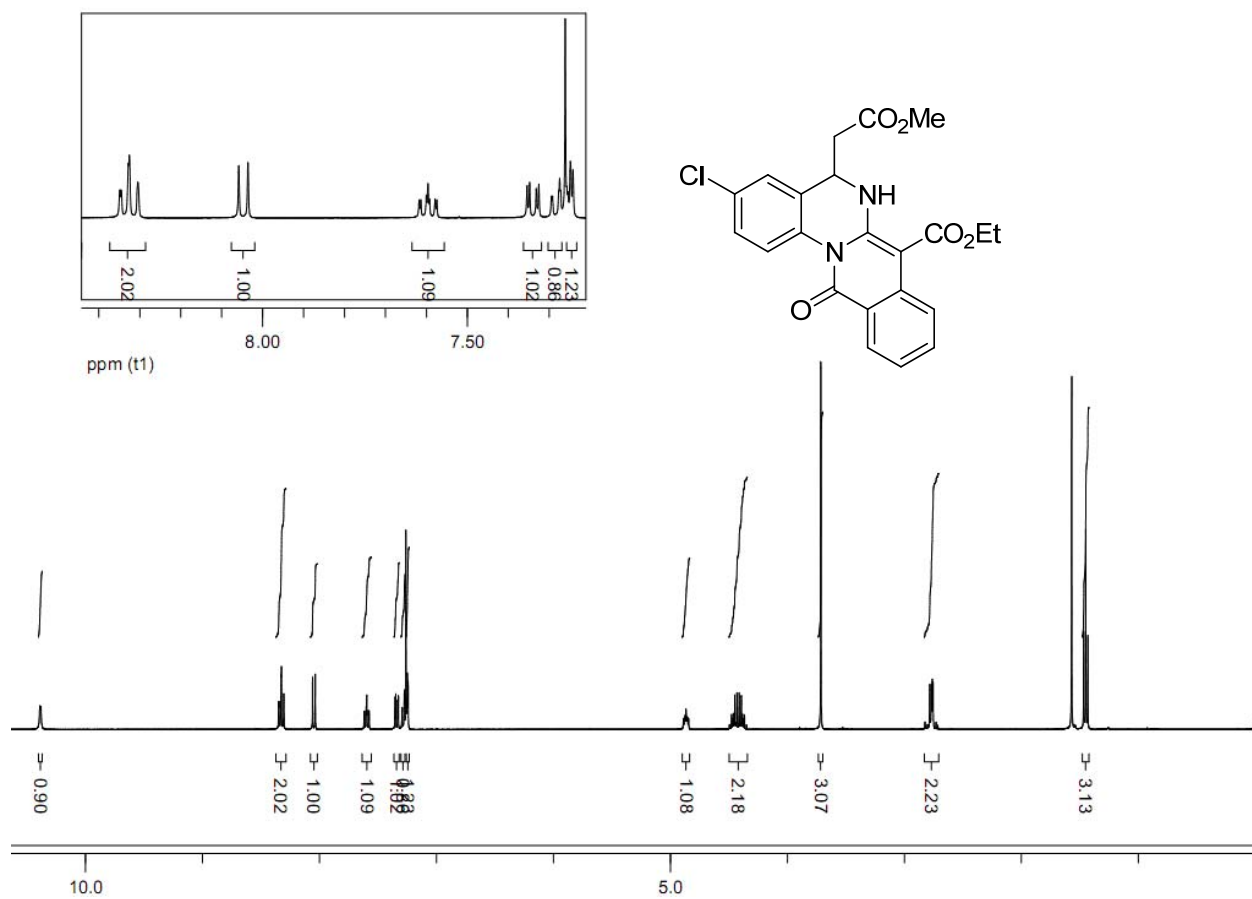

Fig. 56: <sup>1</sup>H NMR spectra of compound **3o** (CDCl<sub>3</sub>, 400 MHz)



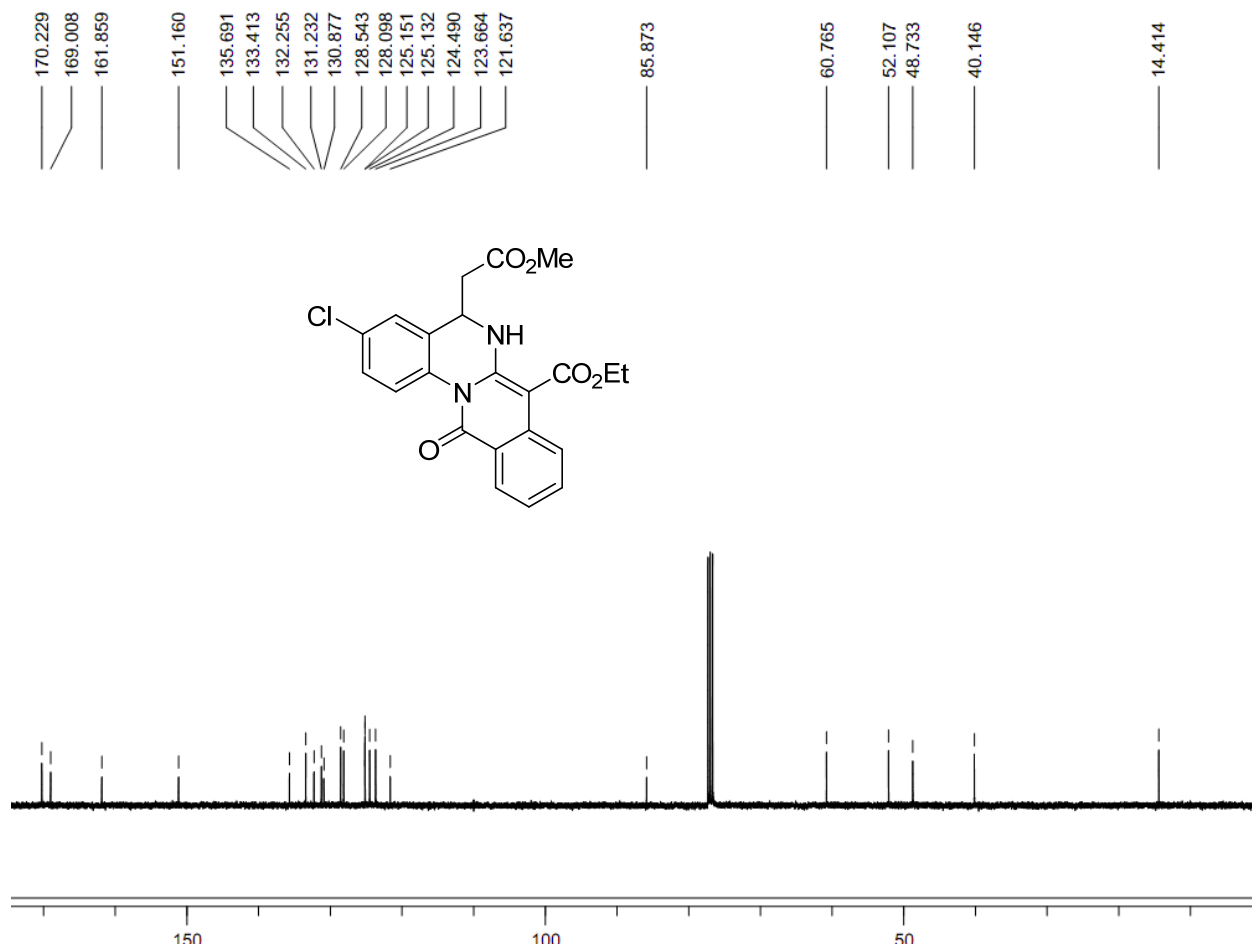

Fig. 57:  $^{13}\text{C}$  NMR spectra of compound **3o** ( $\text{CDCl}_3$ , 100 MHz)

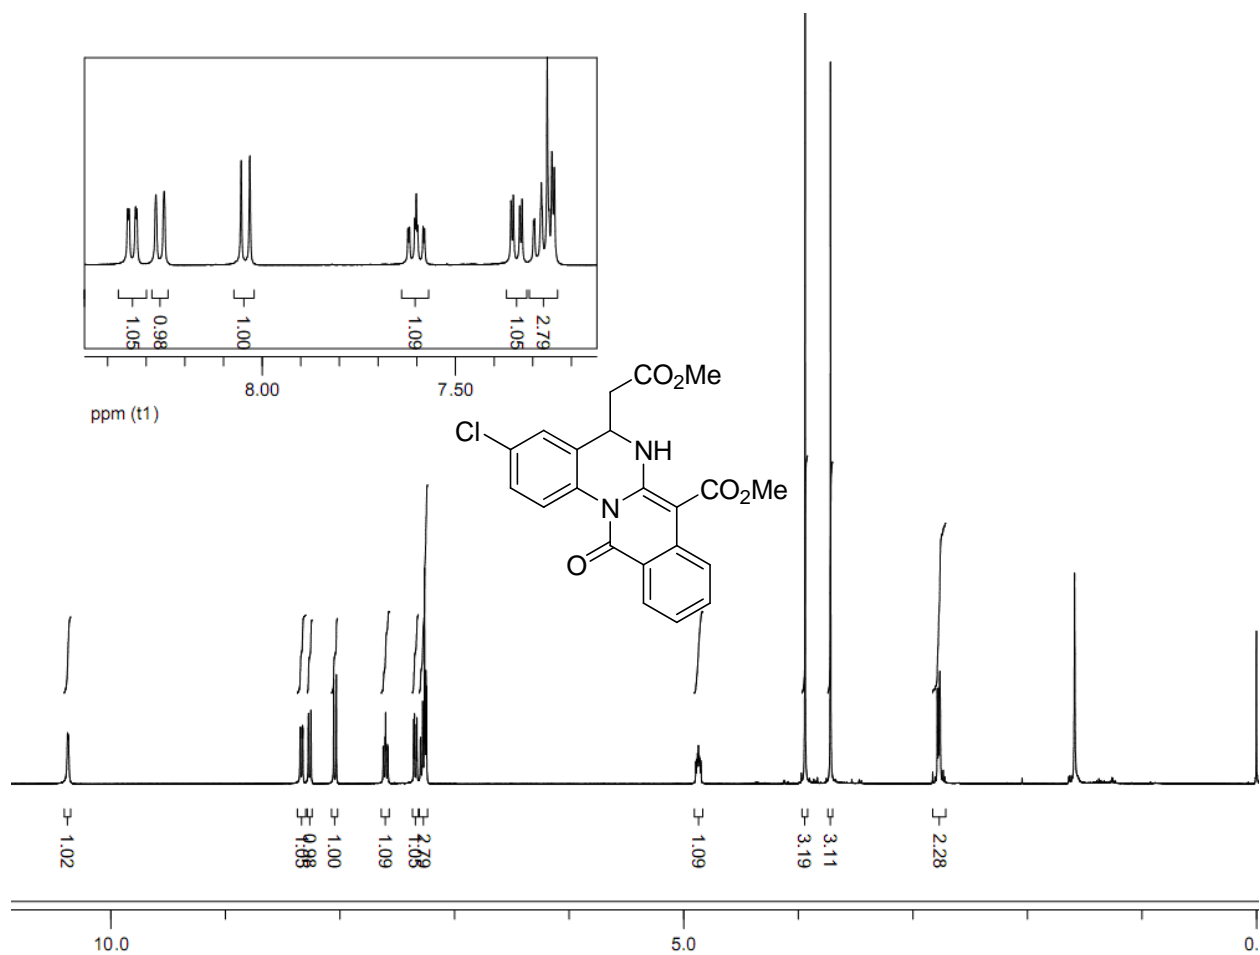

Fig. 58: <sup>1</sup>H NMR spectra of **3p** (CDCl<sub>3</sub>, 400 MHz)

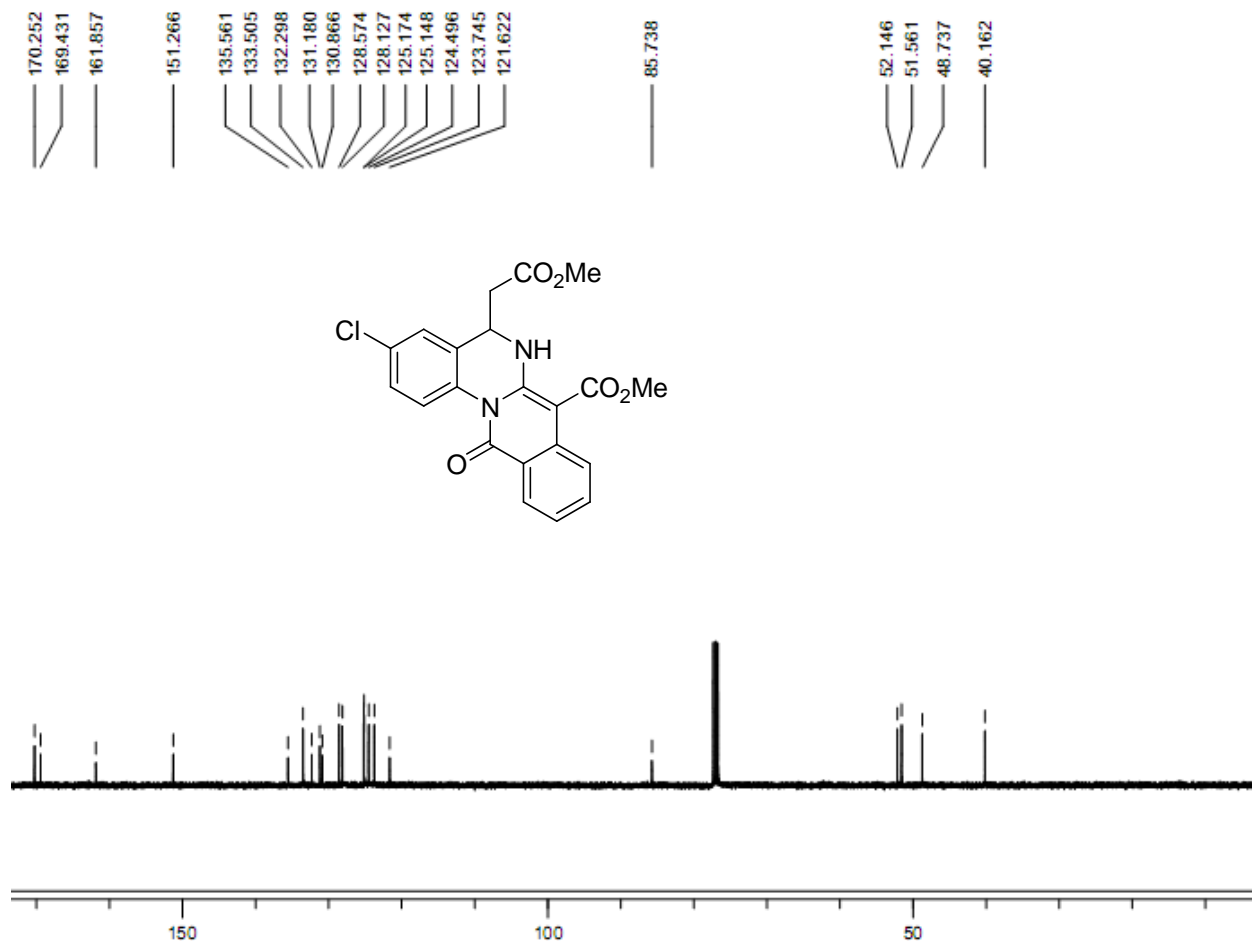

Fig. 59: <sup>13</sup>C NMR spectra of compound **3p** (CDCl<sub>3</sub>, 100 MHz)

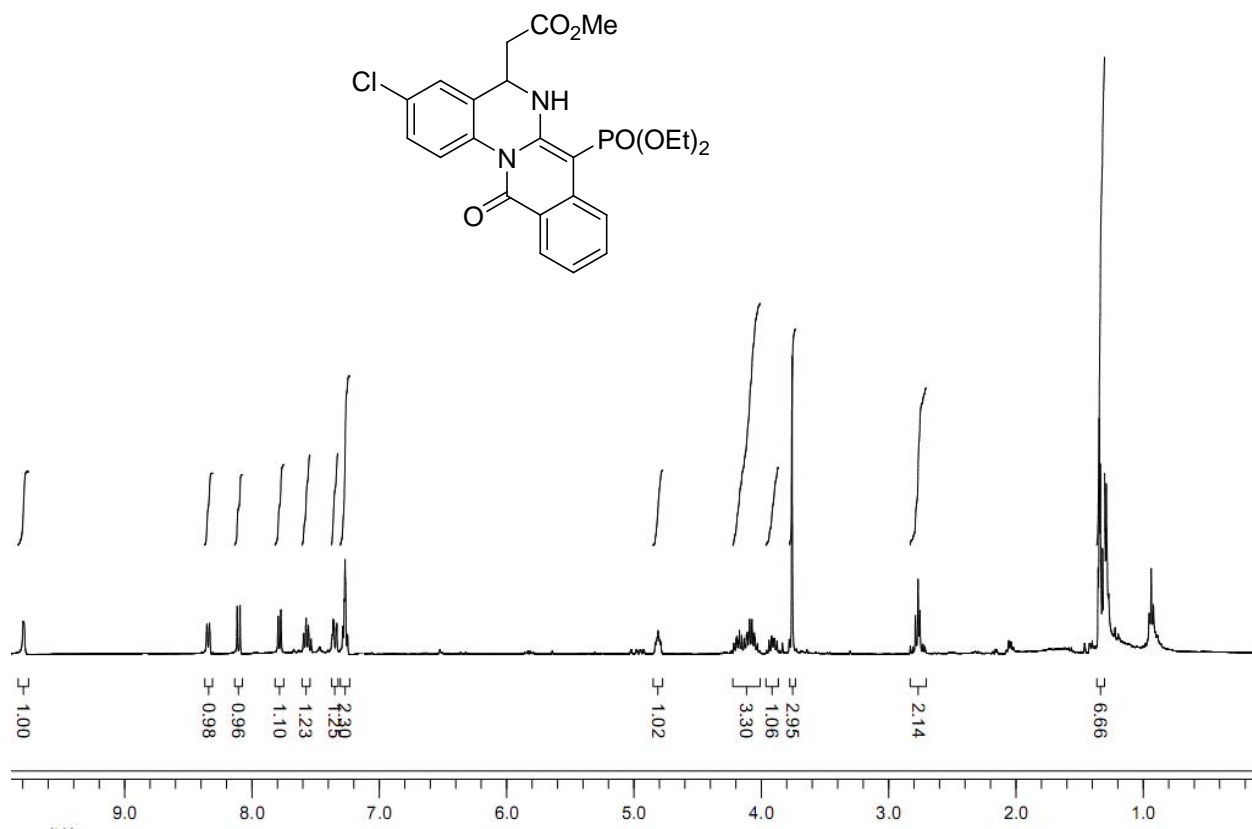

Fig. 60: <sup>1</sup>H NMR spectra of compound **3q** (CDCl<sub>3</sub>, 400 MHz)

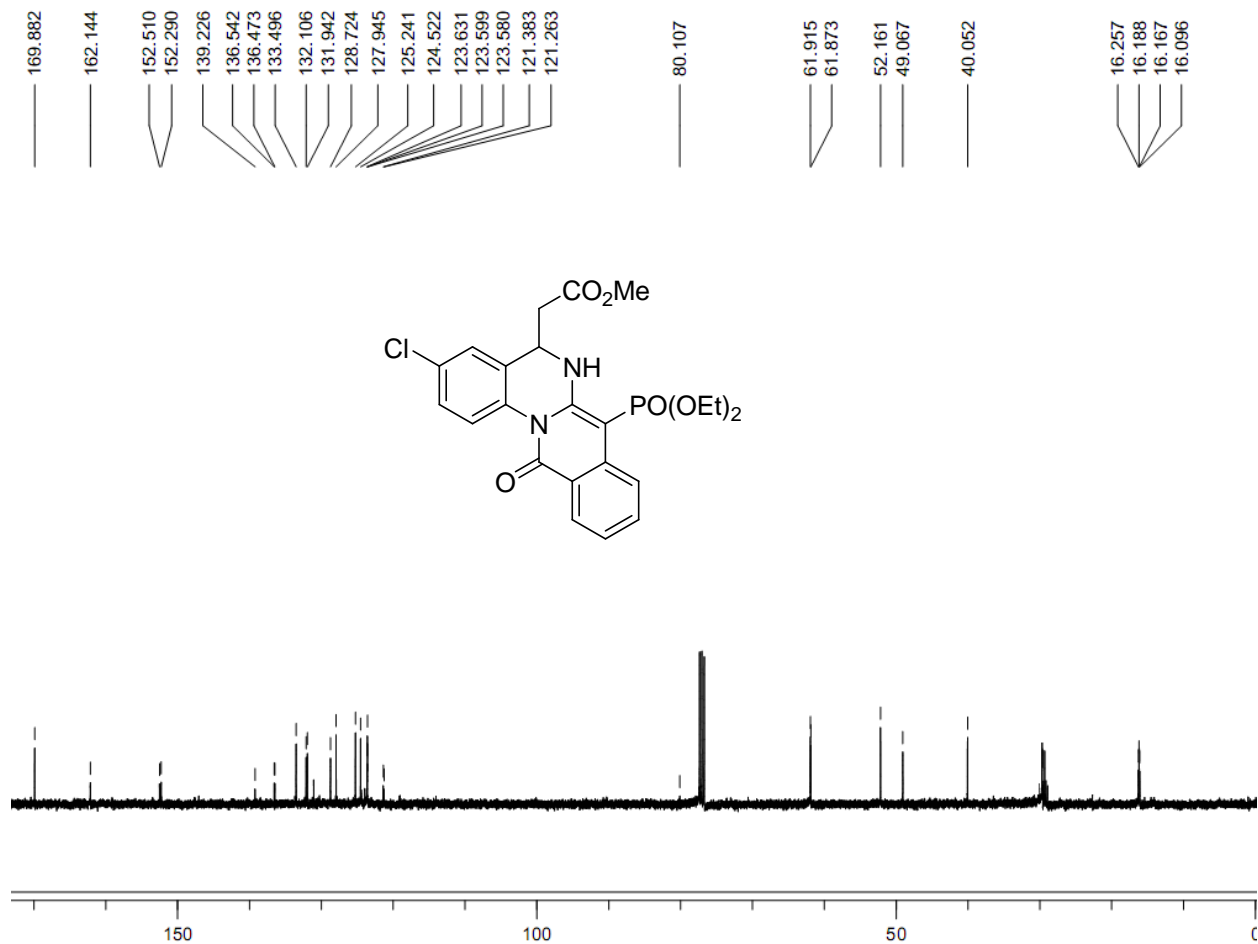

Fig. 61: <sup>13</sup>C NMR spectra of compound **3q** (CDCl<sub>3</sub>, 100 MHz)

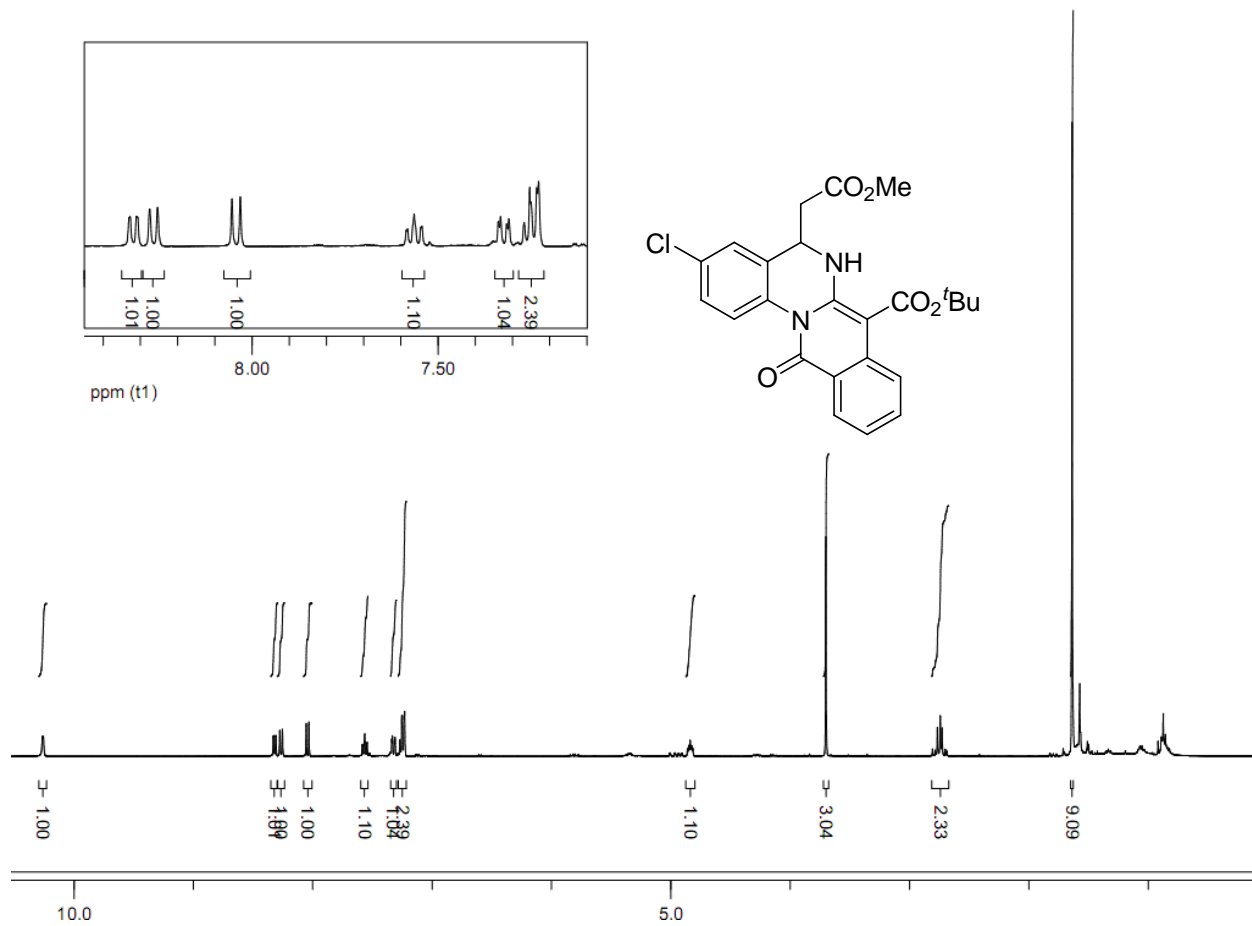

Fig. 62:  $^1\text{H}$  NMR spectra of compound **3r** ( $\text{CDCl}_3$ , 400 MHz)

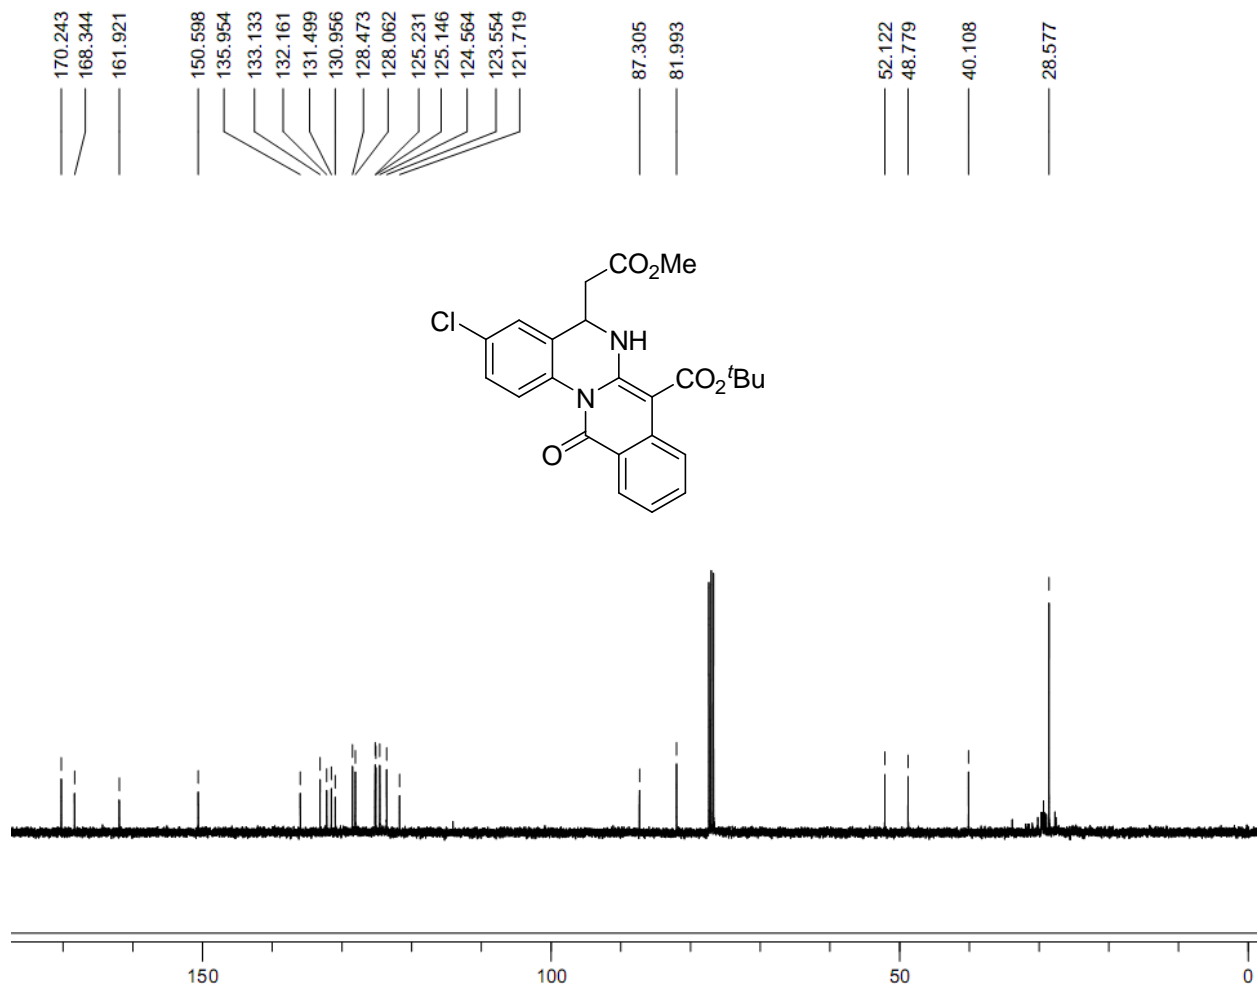

Fig. 63:  $^{13}\text{C}$  NMR spectra of compound **3r** ( $\text{CDCl}_3$ , 100 MHz)

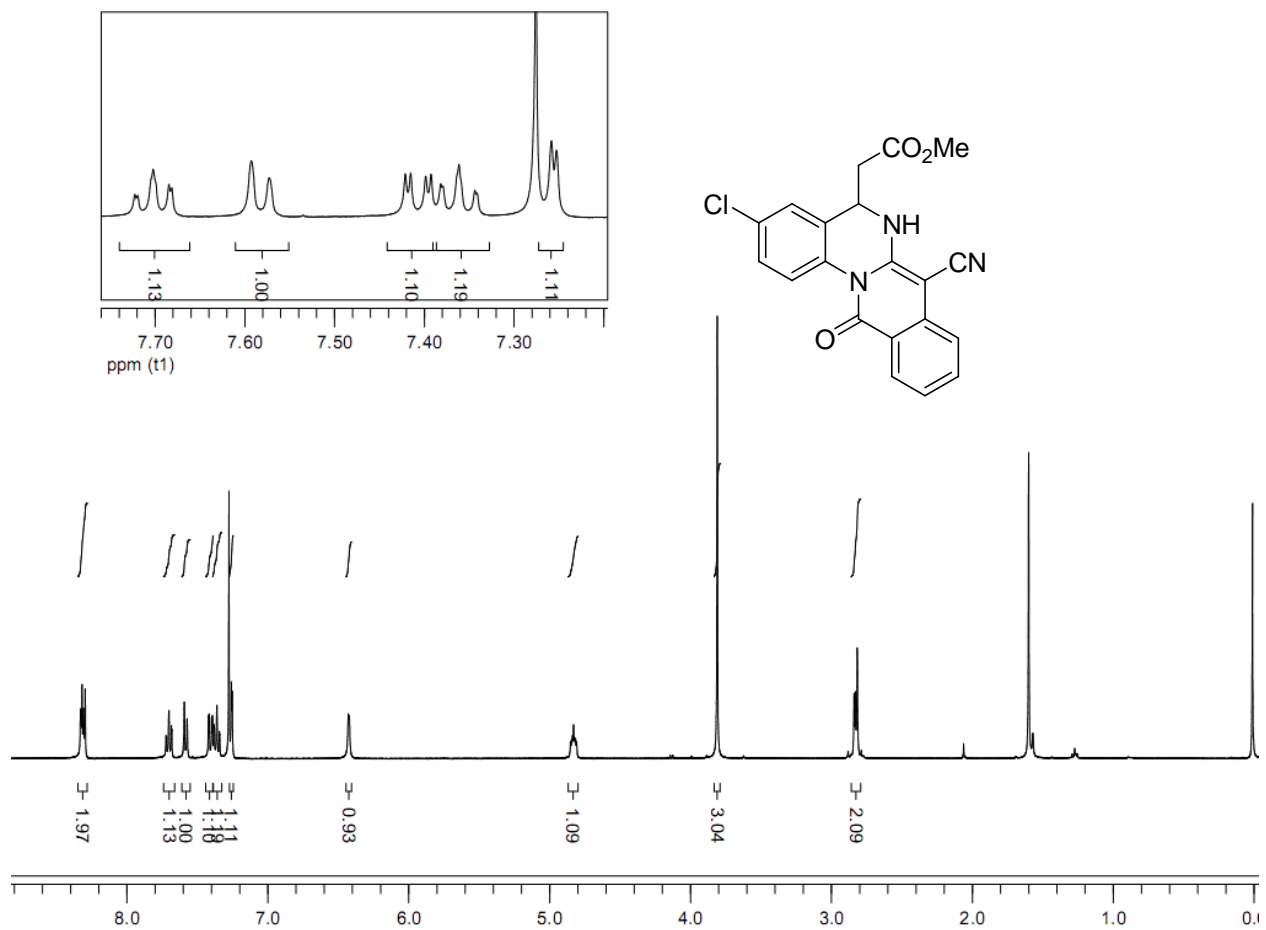

Fig. 64: <sup>1</sup>H NMR spectra of compound **3s** (CDCl<sub>3</sub>, 400 MHz)



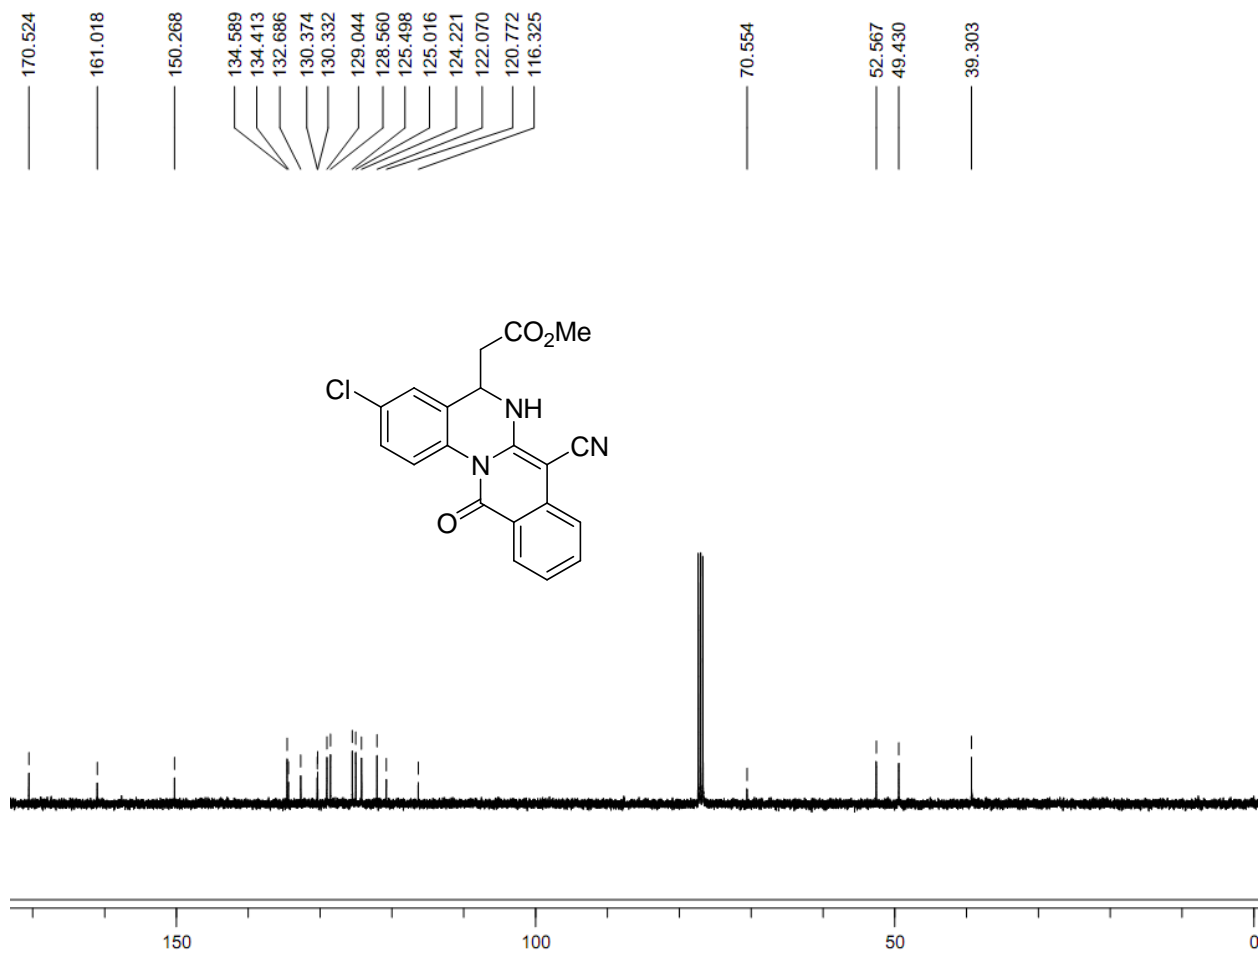

Fig. 65:  $^{13}\text{C}$  NMR spectra of compound **3s** ( $\text{CDCl}_3$ , 100 MHz)

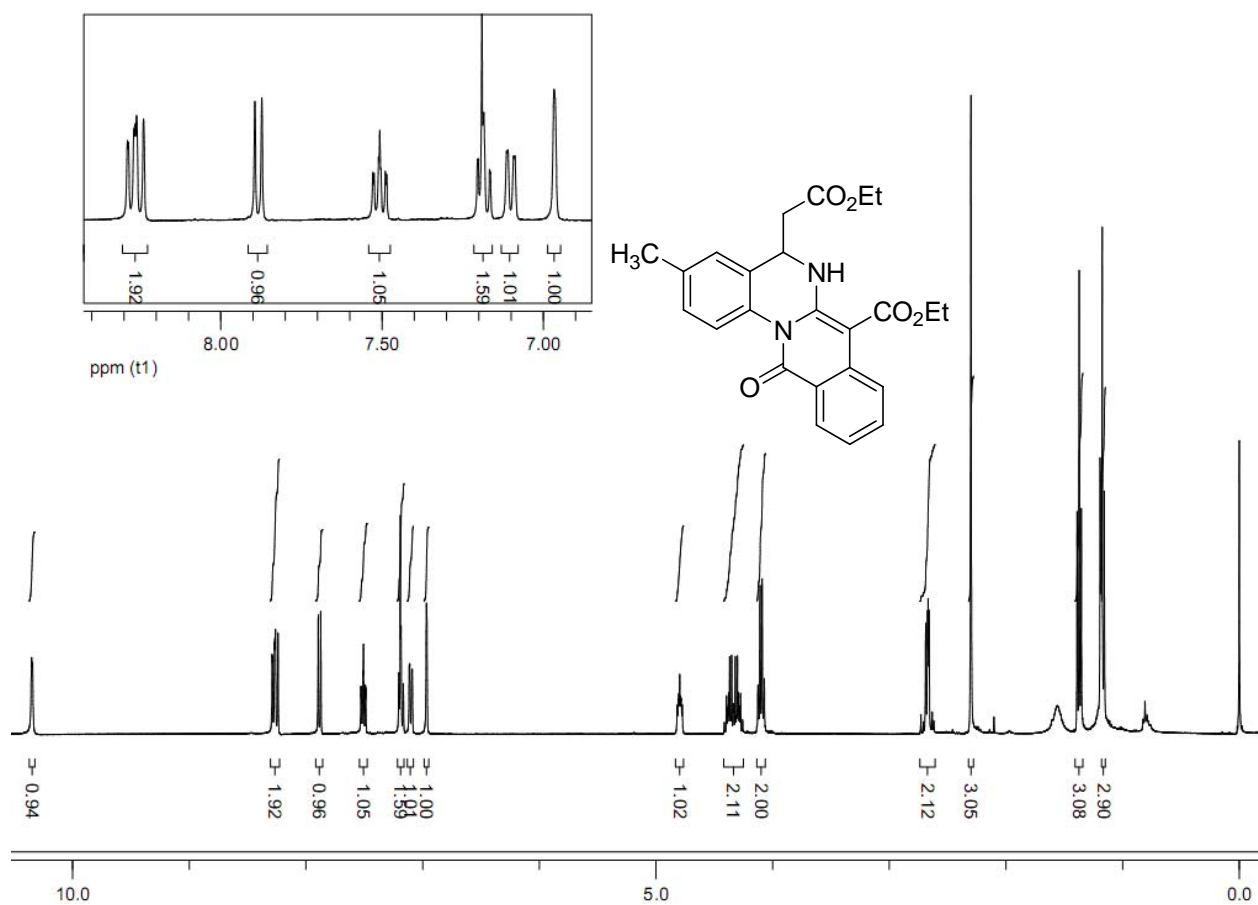

Fig. 66:  $^1\text{H}$  NMR spectra of compound **3t** ( $\text{CDCl}_3$ , 400 MHz)

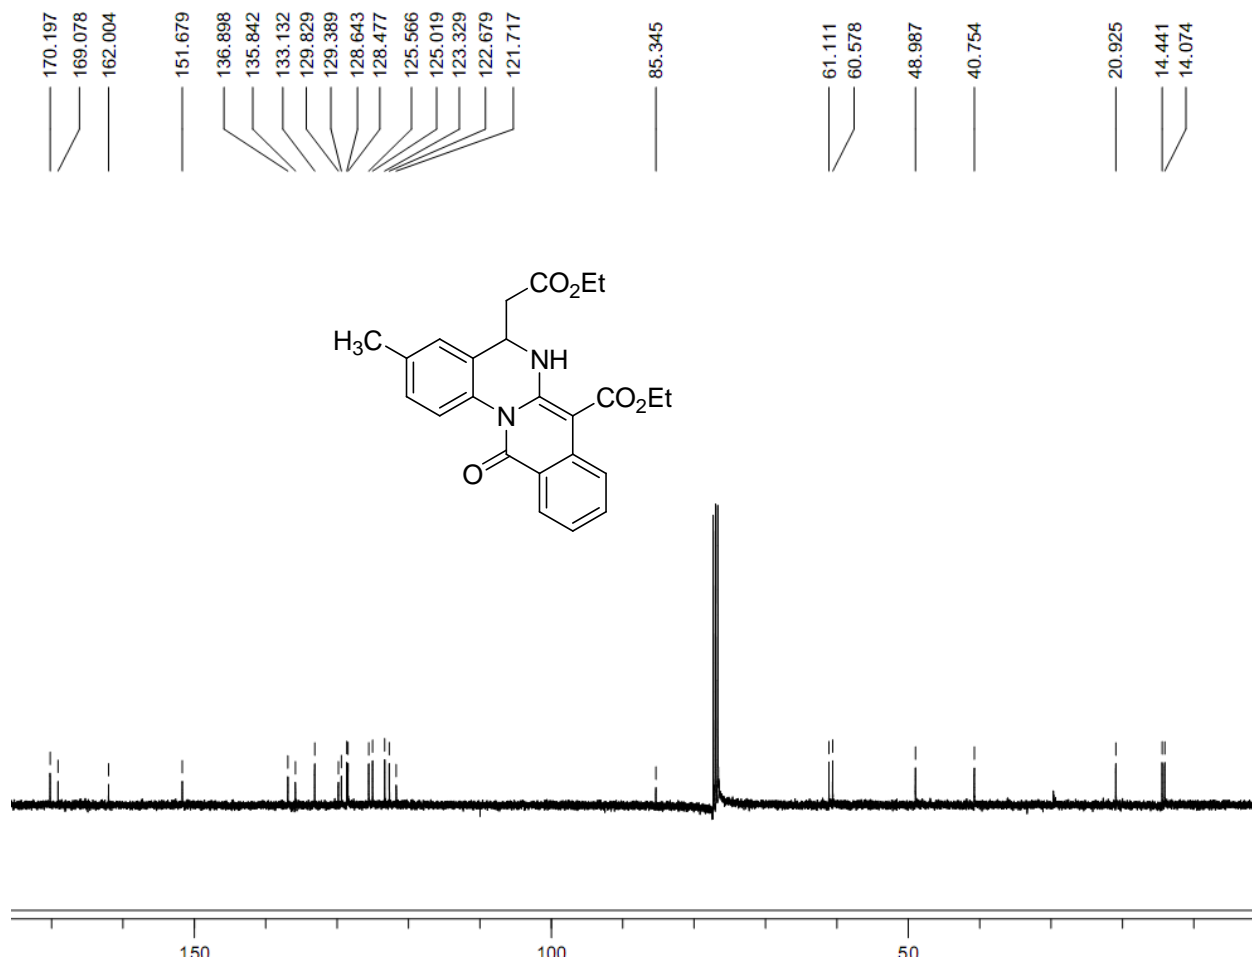

Fig. 67:  $^{13}\text{C}$  NMR spectra of compound **3t** ( $\text{CDCl}_3$ , 100 MHz)



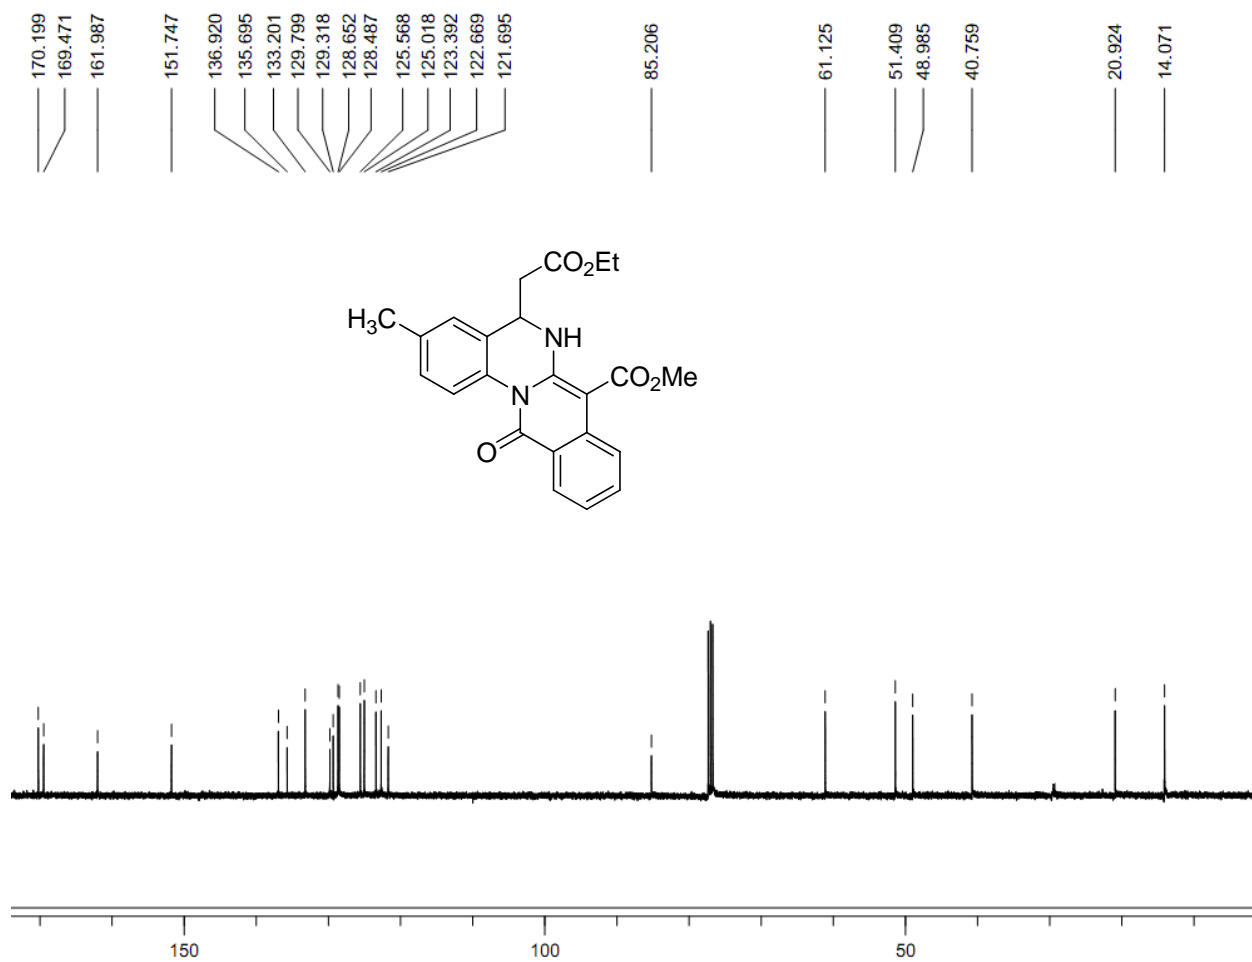

Fig. 69:  $^{13}\text{C}$  NMR spectra of compound **3u** ( $\text{CDCl}_3$ , 100 MHz)

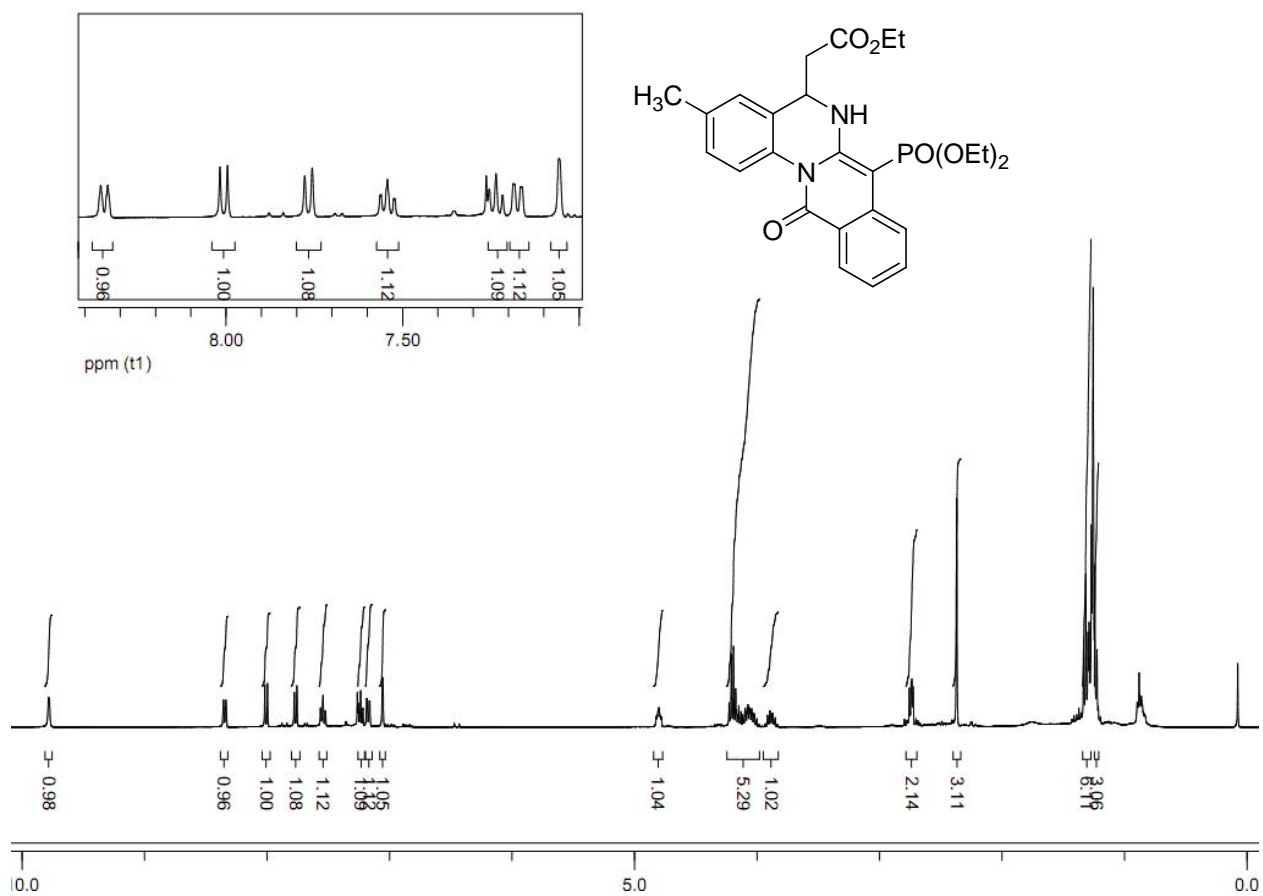

Fig. 70: <sup>1</sup>H NMR spectra of compound **3v** (CDCl<sub>3</sub>, 400 MHz)



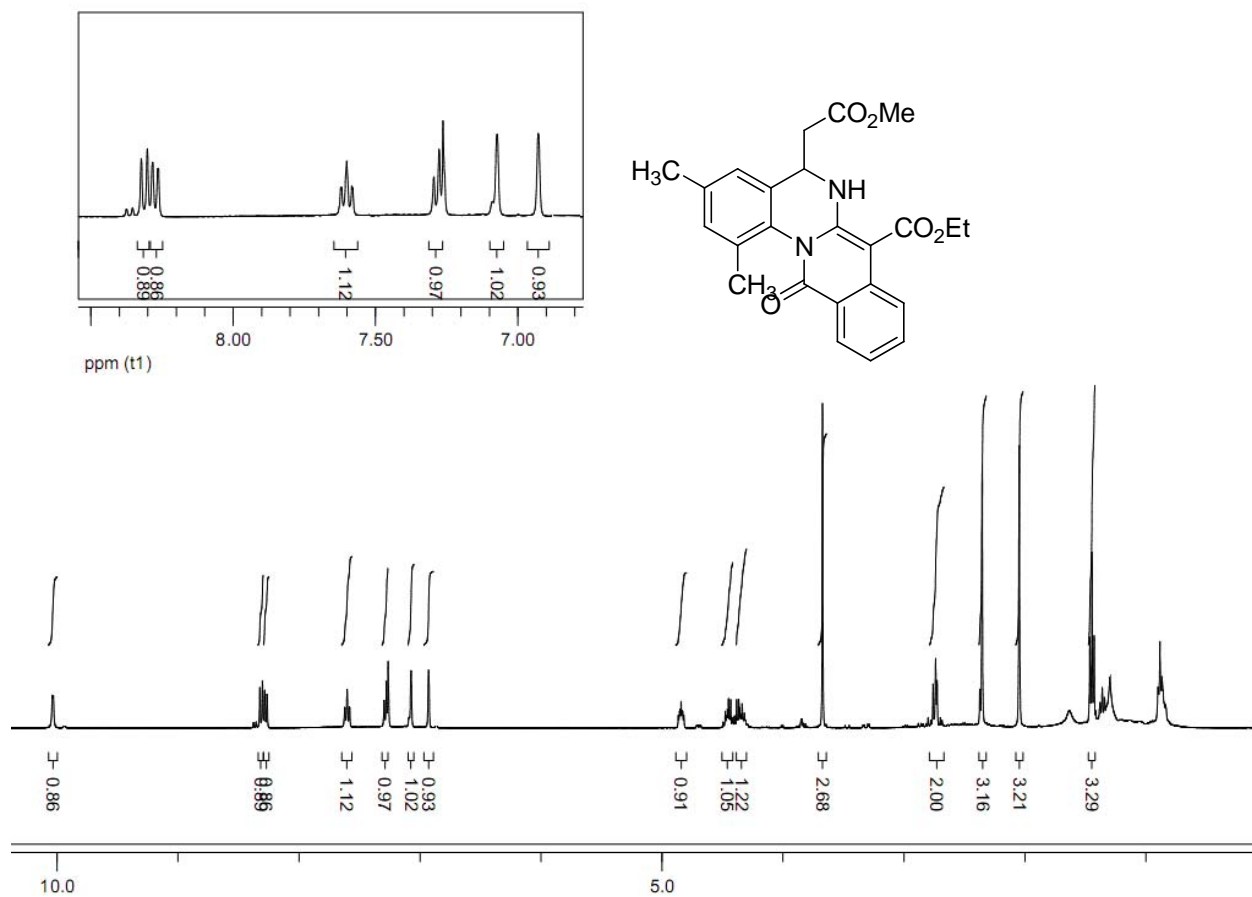

Fig. 72:  $^1\text{H}$  NMR spectra of compound **3w** ( $\text{CDCl}_3$ , 400 MHz)



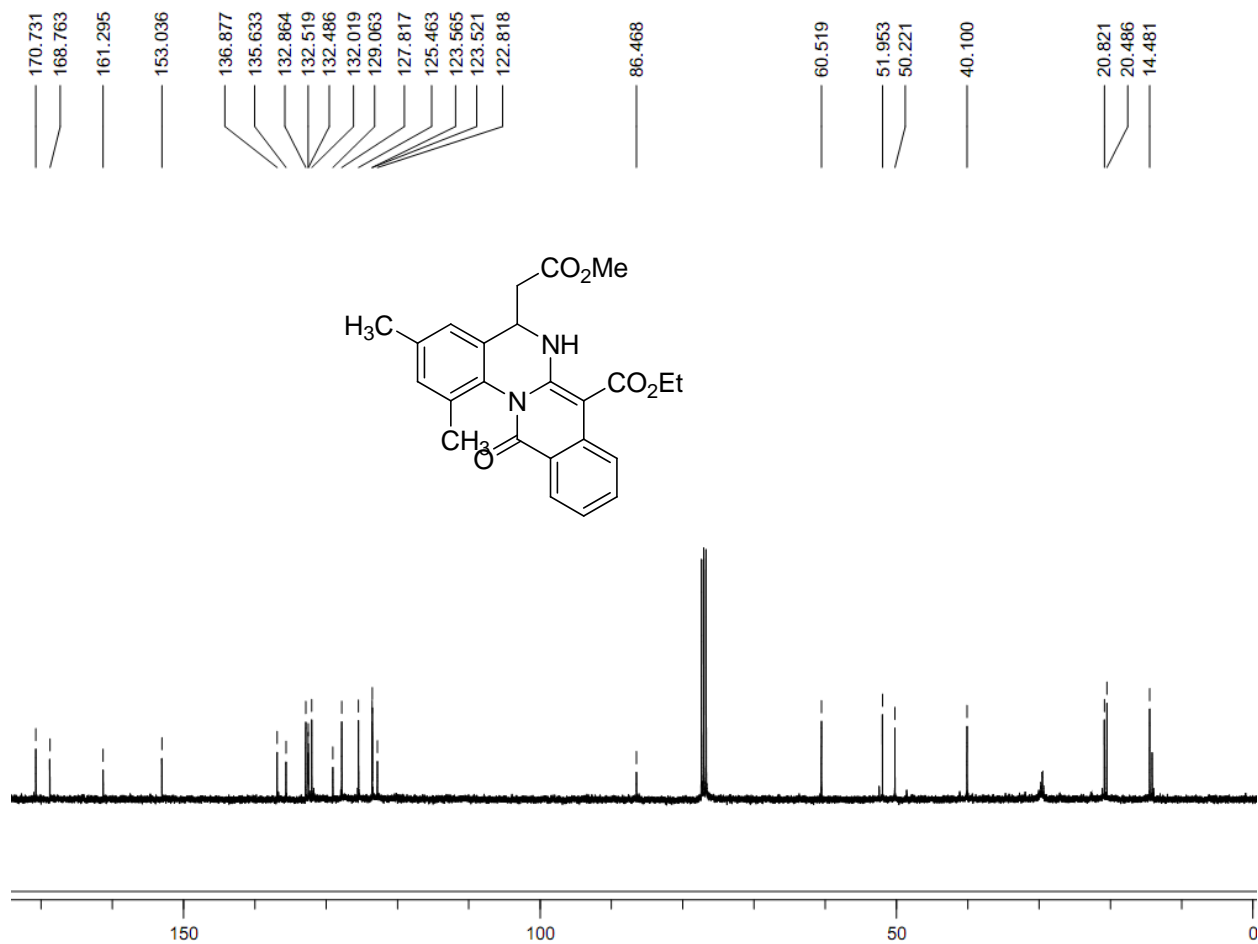

Fig. 73:  $^{13}\text{C}$  NMR spectra of compound **3w** ( $\text{CDCl}_3$ , 100 MHz)

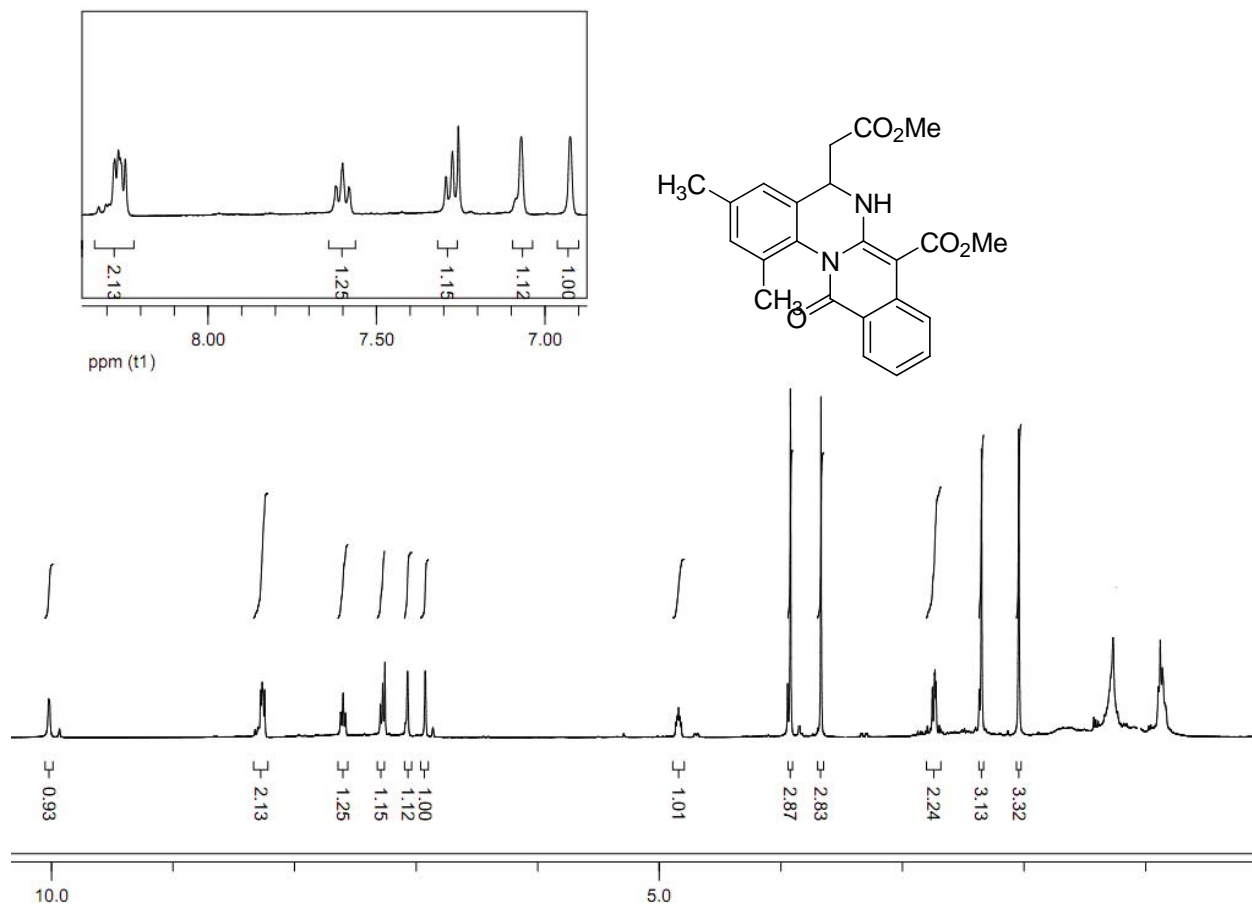

Fig. 74: <sup>1</sup>H NMR spectra of compound **3x** (CDCl<sub>3</sub>, 400 MHz)

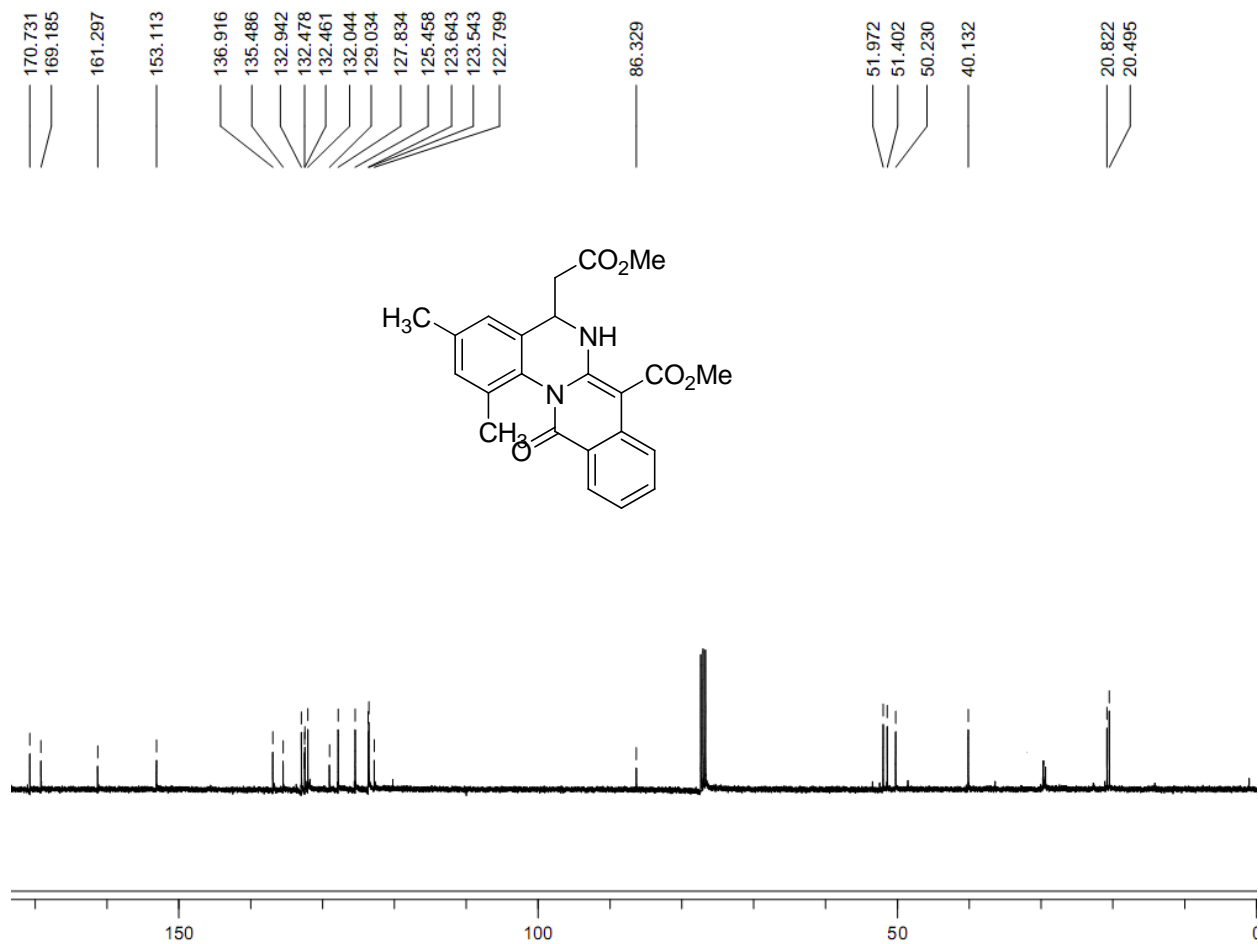

Fig. 75: <sup>13</sup>C NMR spectra of compound **3x** (CDCl<sub>3</sub>, 100 MHz)

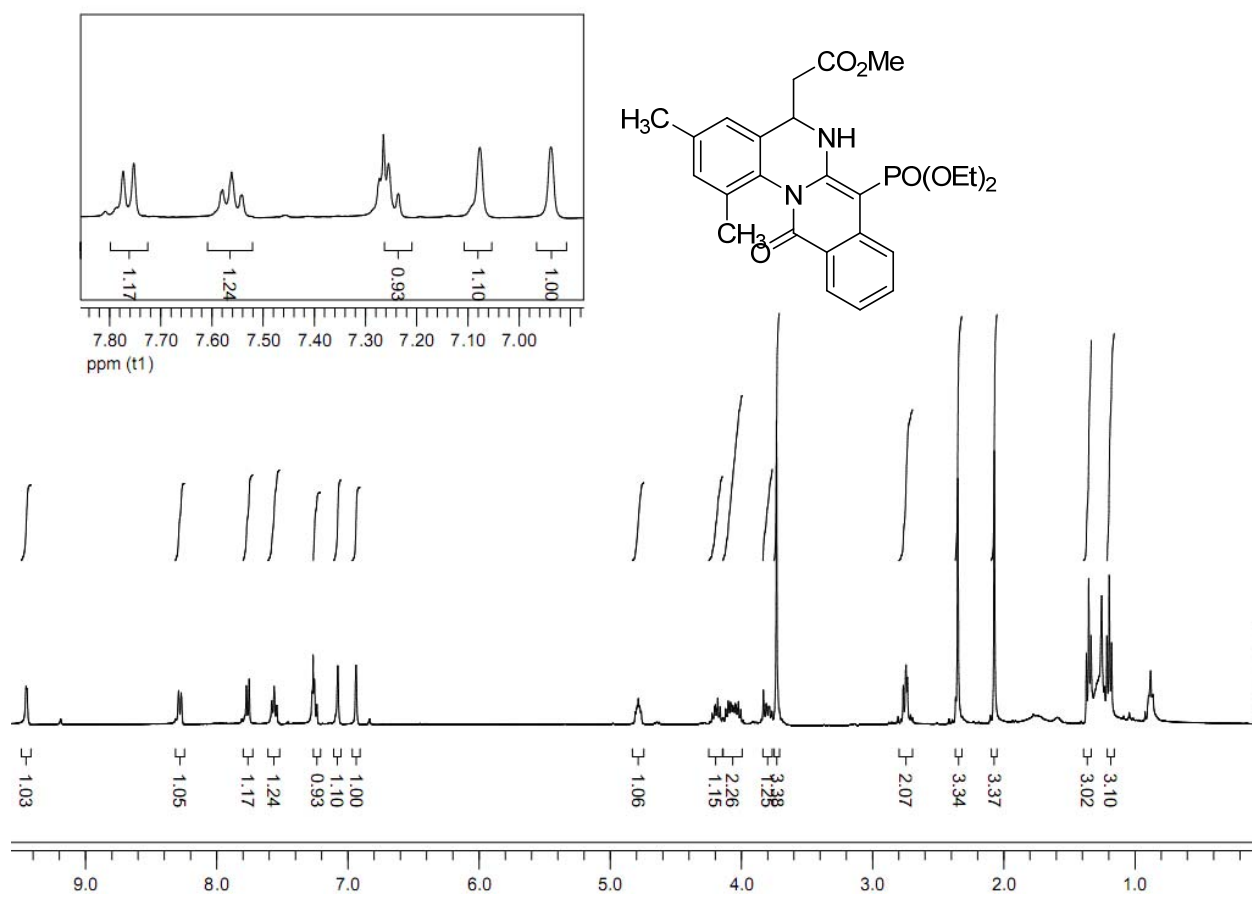

Fig. 76:  $^1\text{H}$  NMR spectra of compound **3y** ( $\text{CDCl}_3$ , 400 MHz)

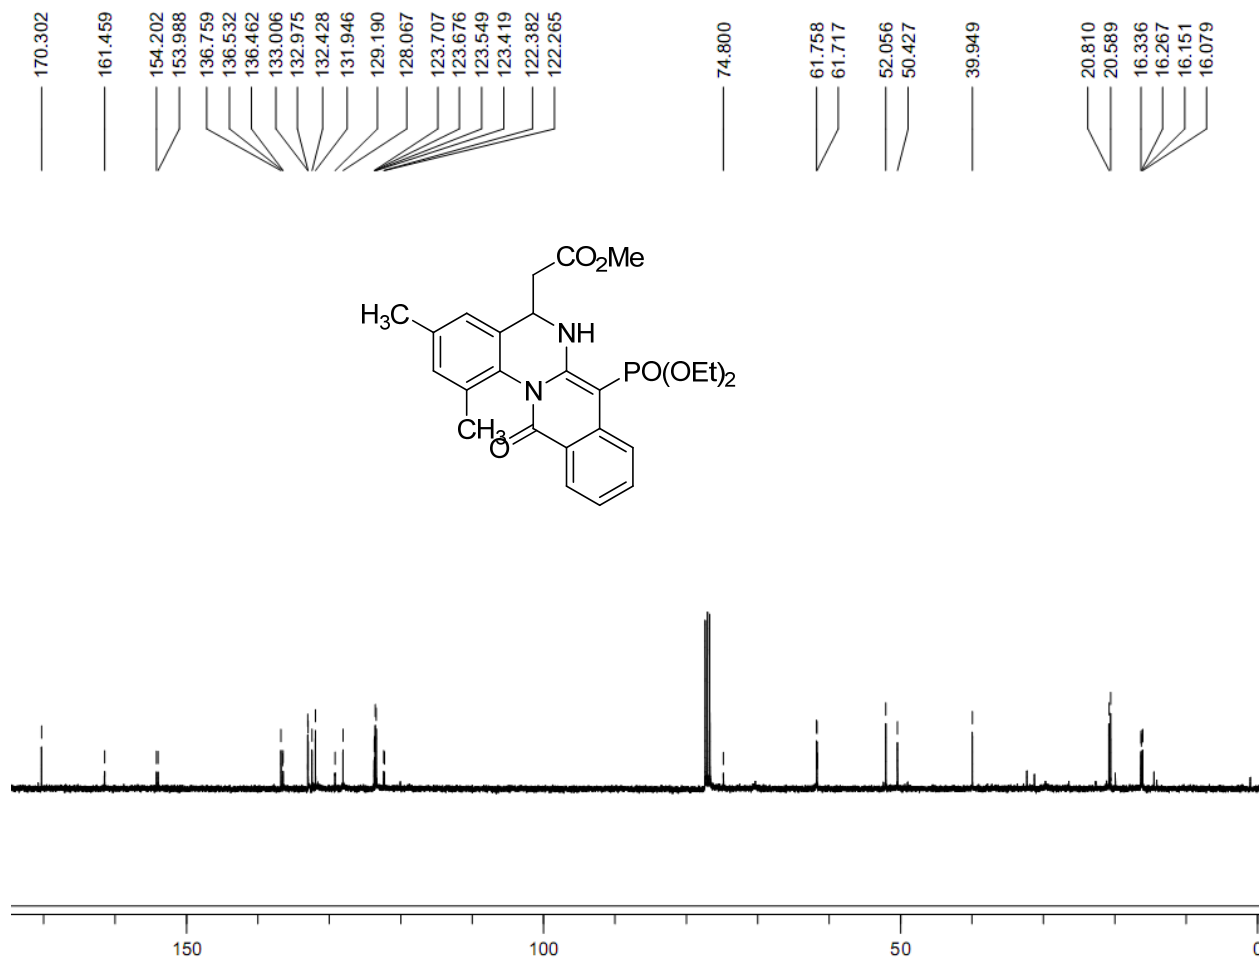

Fig. 77: <sup>13</sup>C NMR spectra of compound **3y** (CDCl<sub>3</sub>, 100 MHz)

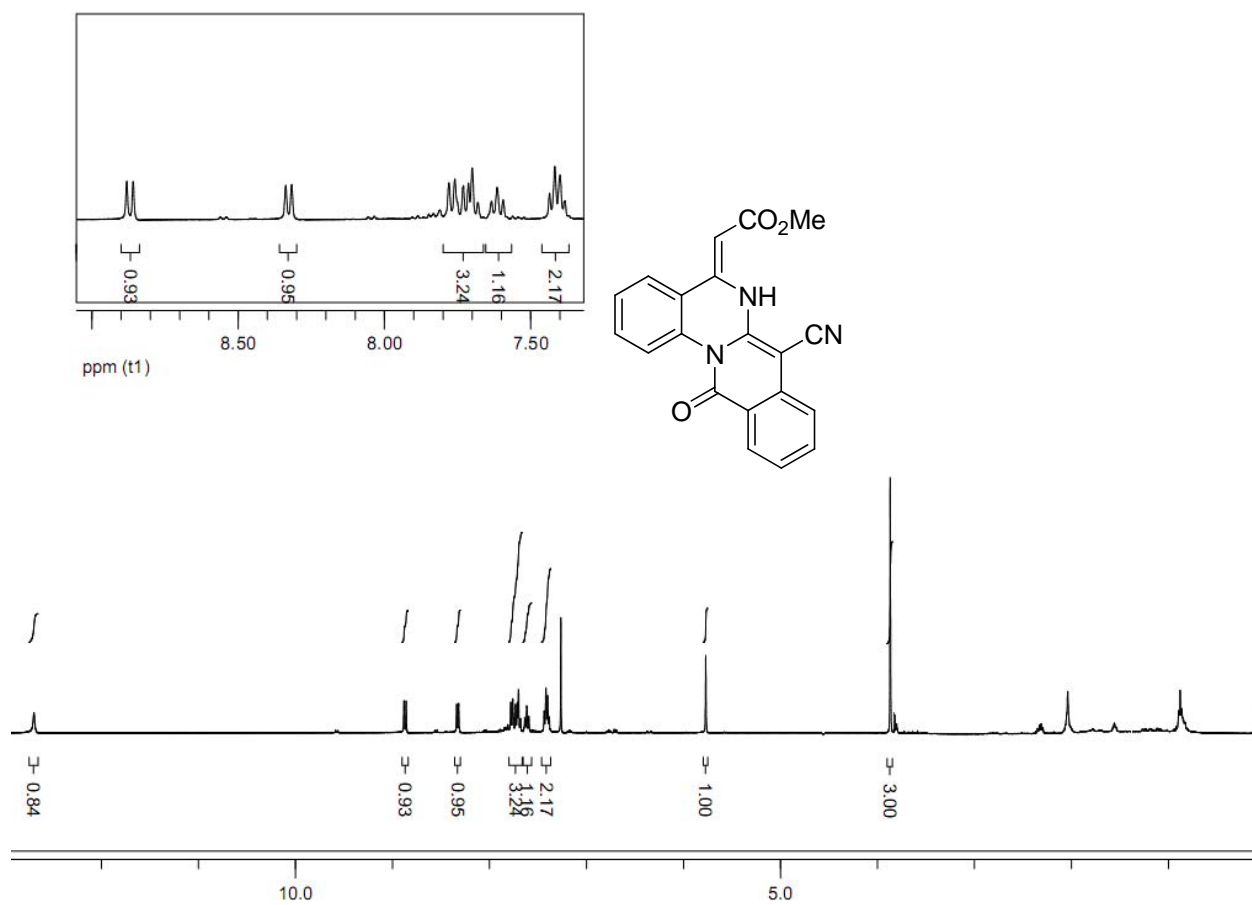

Fig. 78: <sup>1</sup>H NMR spectra of compound **4a** (CDCl<sub>3</sub>, 400 MHz)

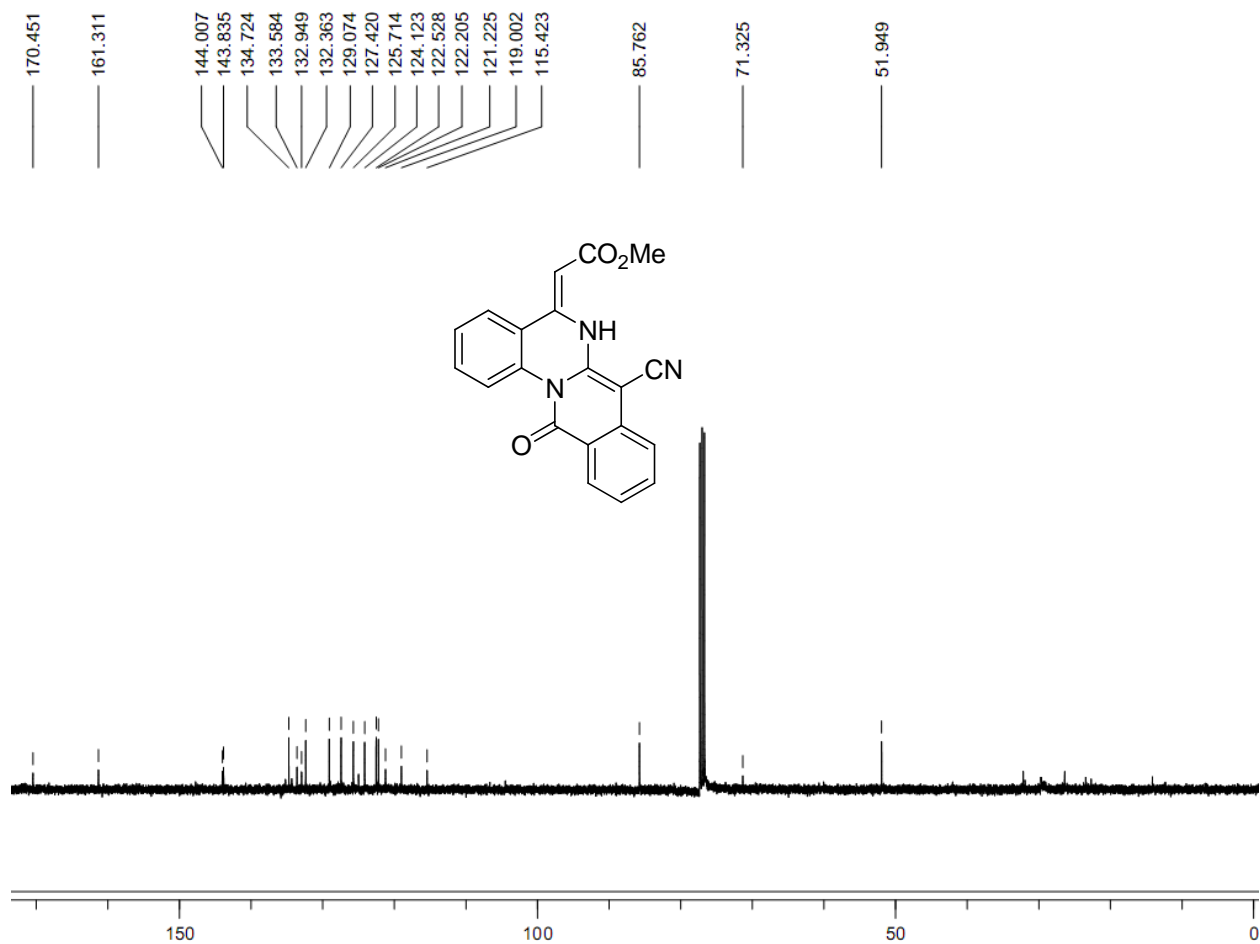

Fig. 79: <sup>13</sup>C NMR spectra of compound **4a** (CDCl<sub>3</sub>, 100 MHz)

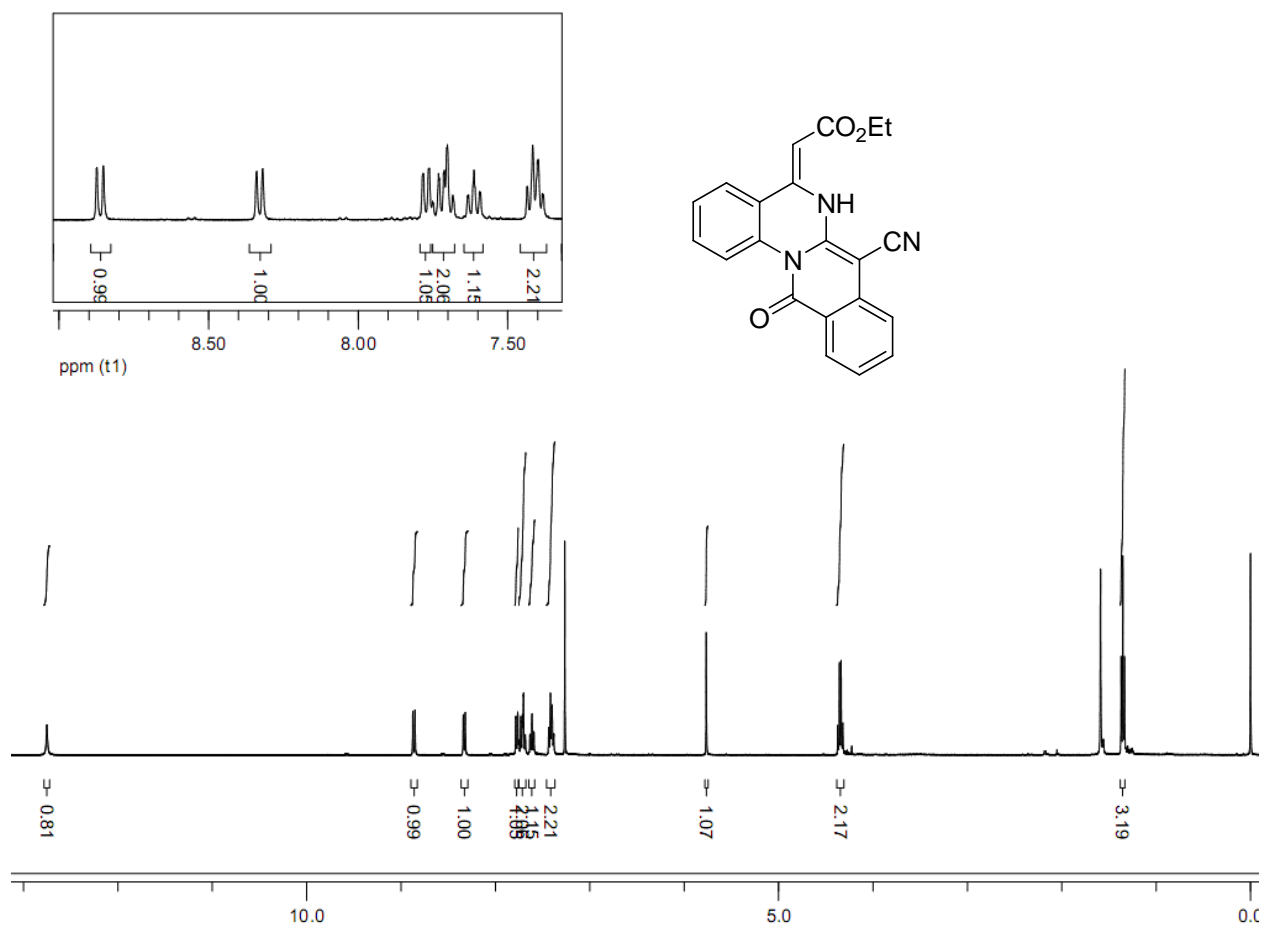

Fig. 80: <sup>1</sup>H NMR spectra of compound **4b** (CDCl<sub>3</sub>, 400 MHz)



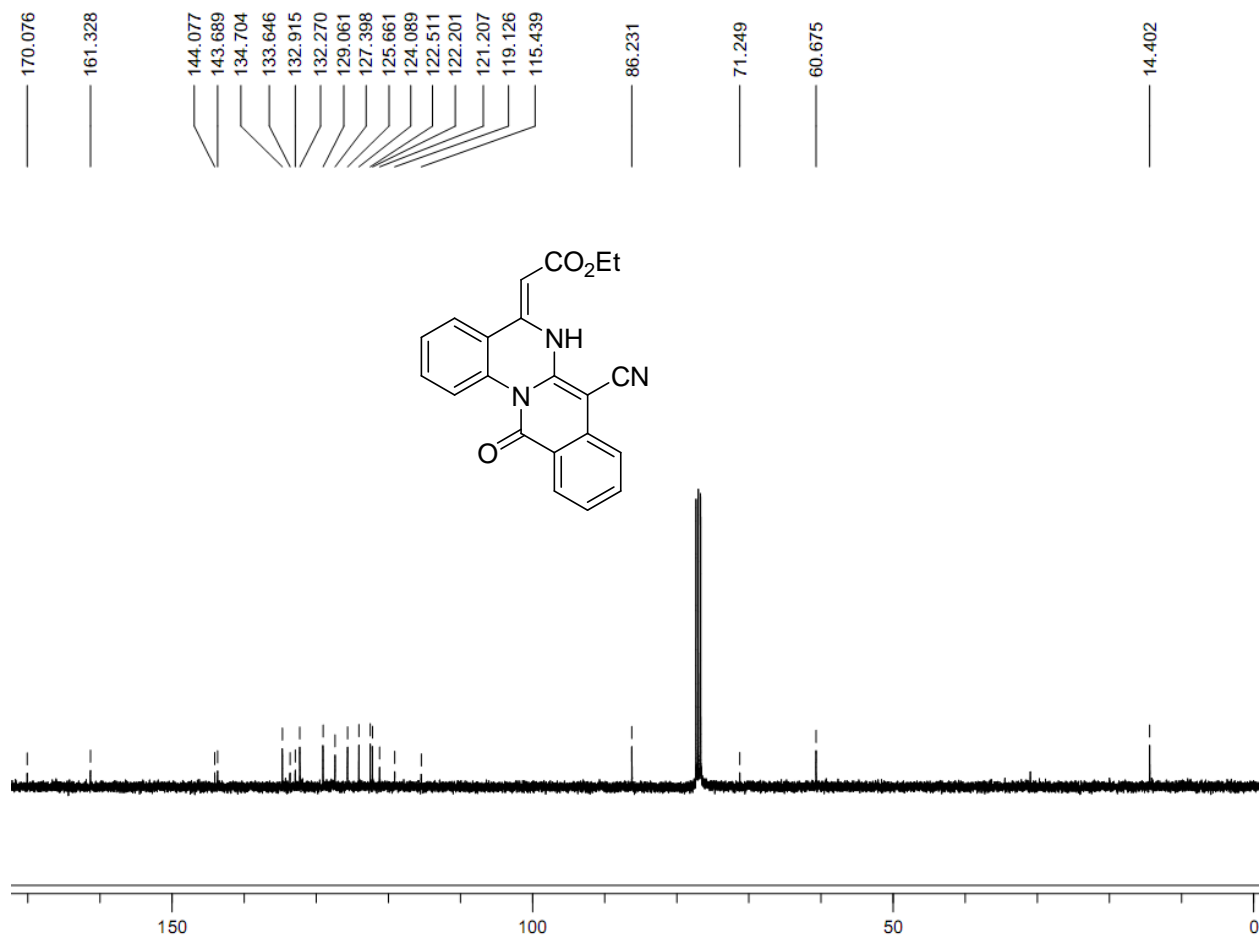

Fig. 81:  $^{13}\text{C}$  NMR spectra of compound **4b** ( $\text{CDCl}_3$ , 100 MHz)

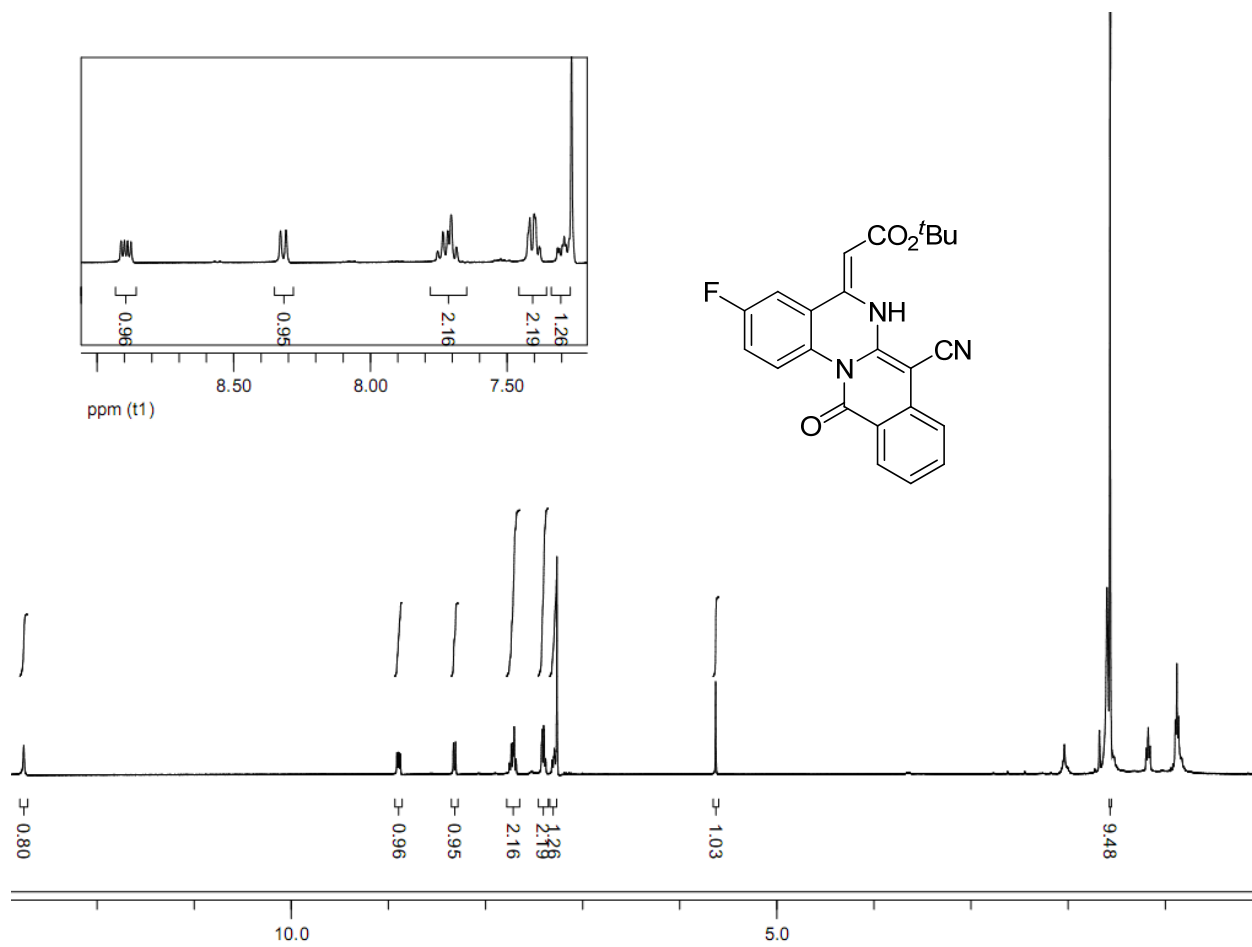

Fig. 82:  $^1\text{H}$  NMR spectra of compound **4c** ( $\text{CDCl}_3$ , 400 MHz)

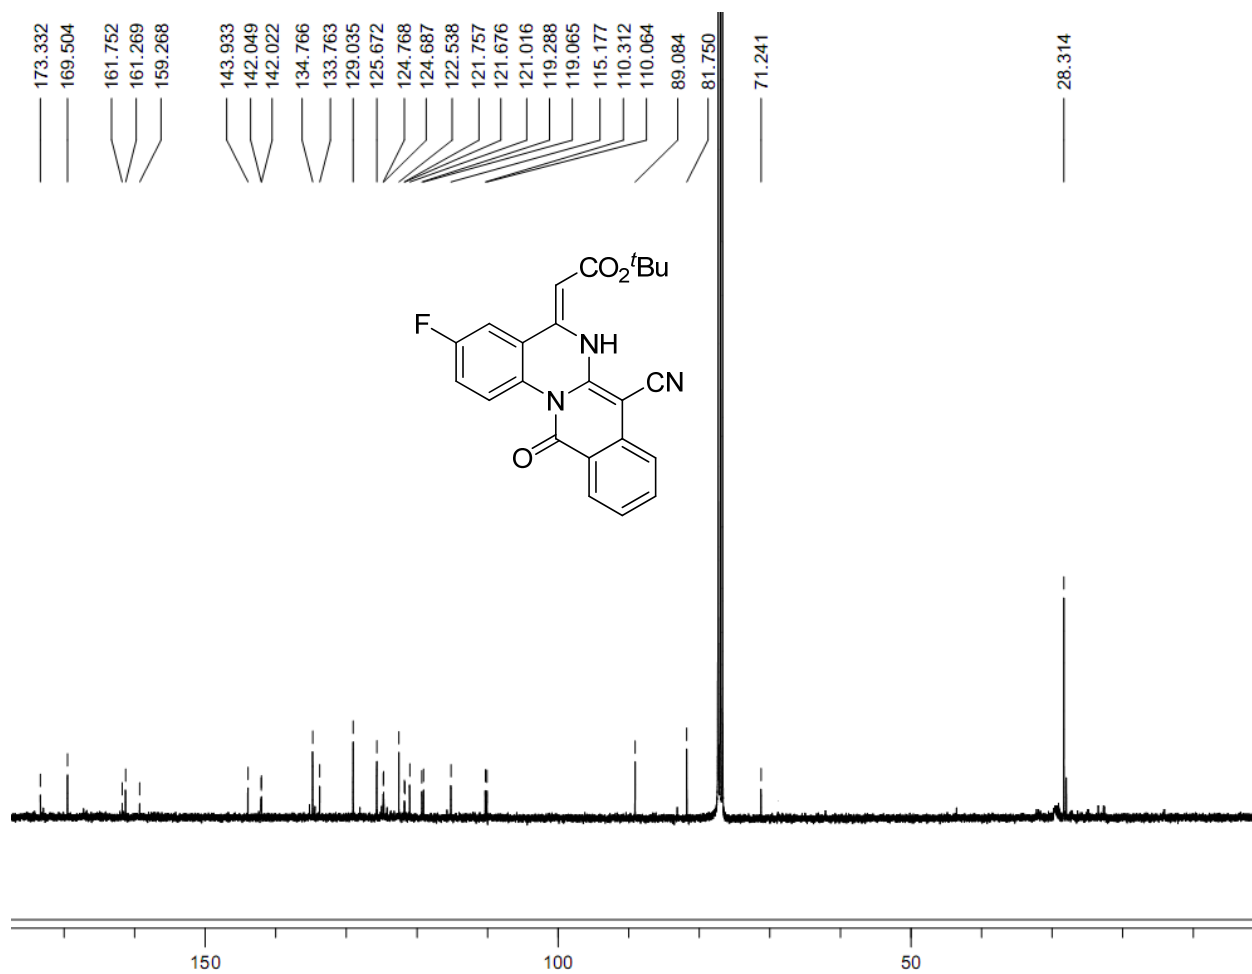

Fig. 83:  $^{13}\text{C}$  NMR spectra of compound **4c** ( $\text{CDCl}_3$ , 100 MHz)

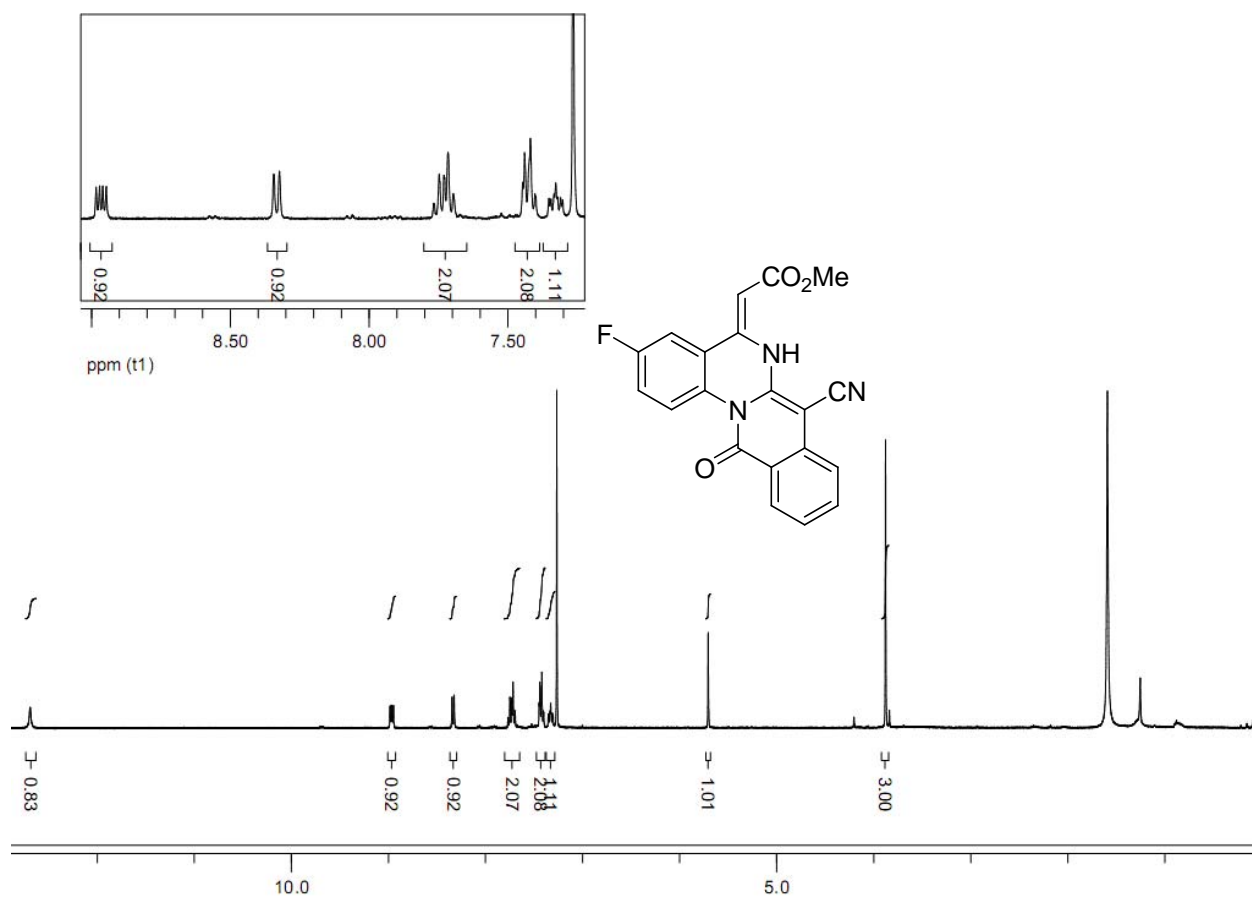

Fig. 84:  $^1\text{H}$  NMR spectra of compound **4d** ( $\text{CDCl}_3$ , 400 MHz)

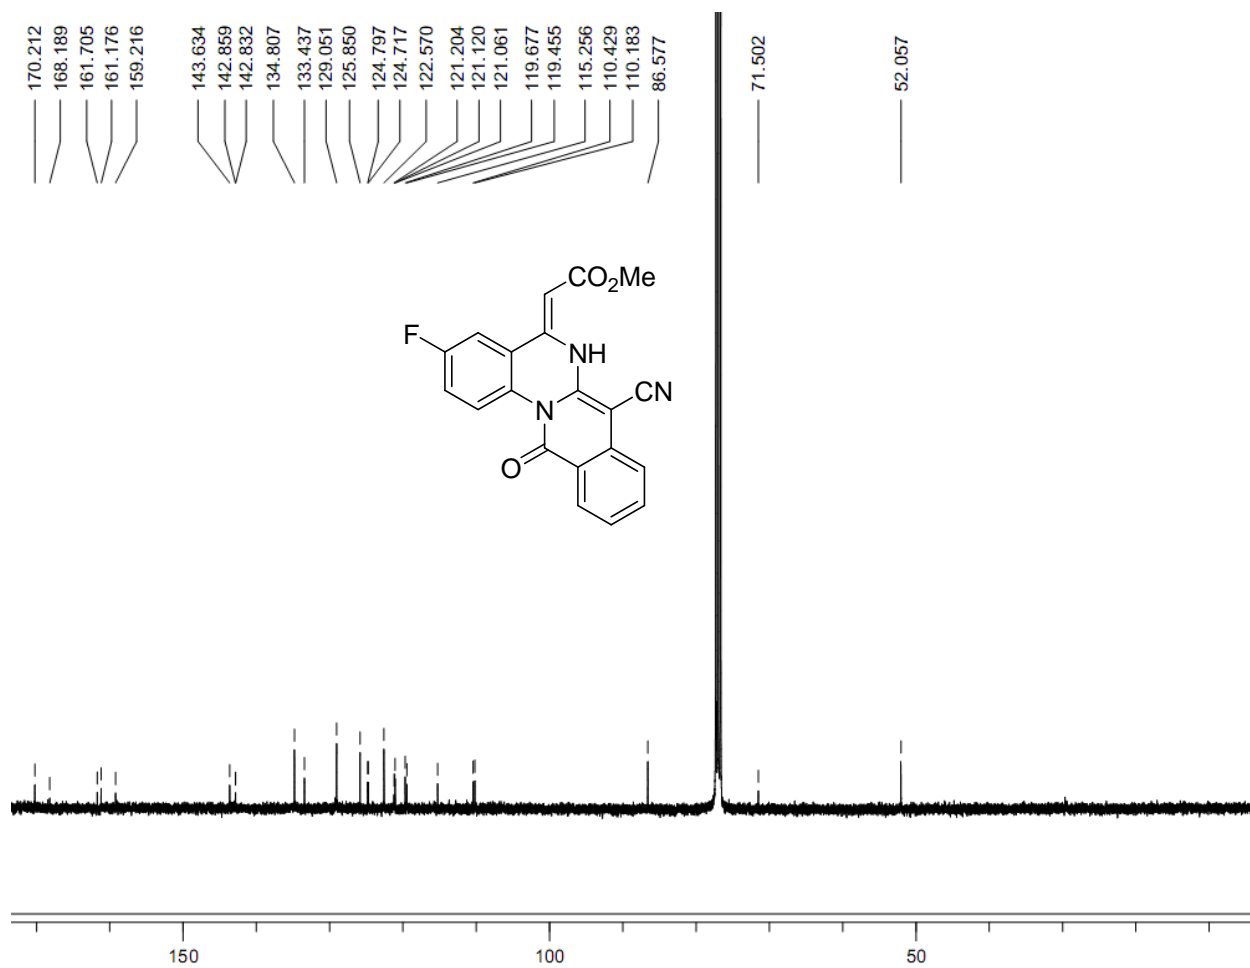

Fig. 85:  $^{13}\text{C}$  NMR spectra of compound **4d** ( $\text{CDCl}_3$ , 100 MHz)

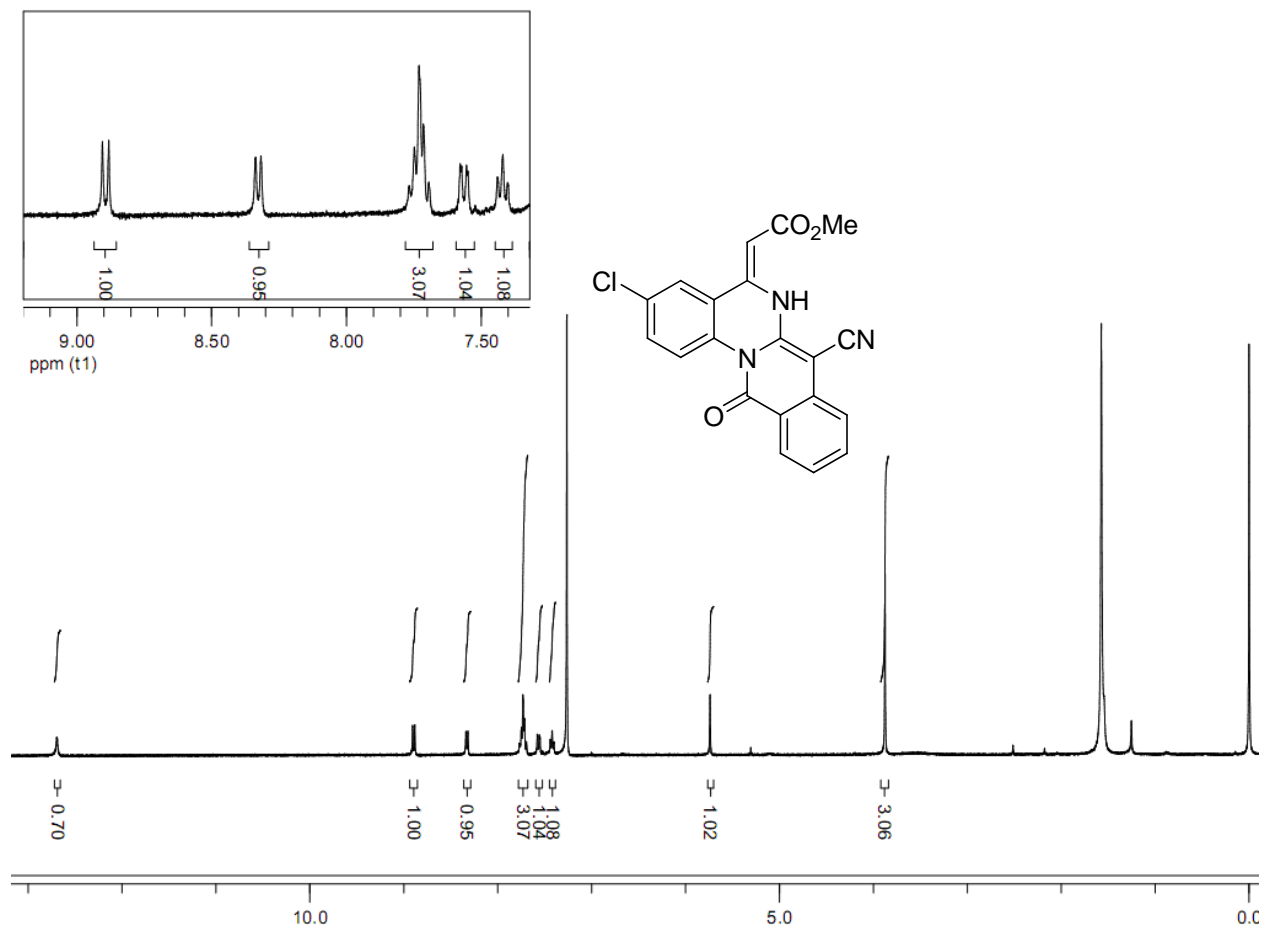

Fig. 86: <sup>1</sup>H NMR spectra of compound **4e** (CDCl<sub>3</sub>, 400 MHz)

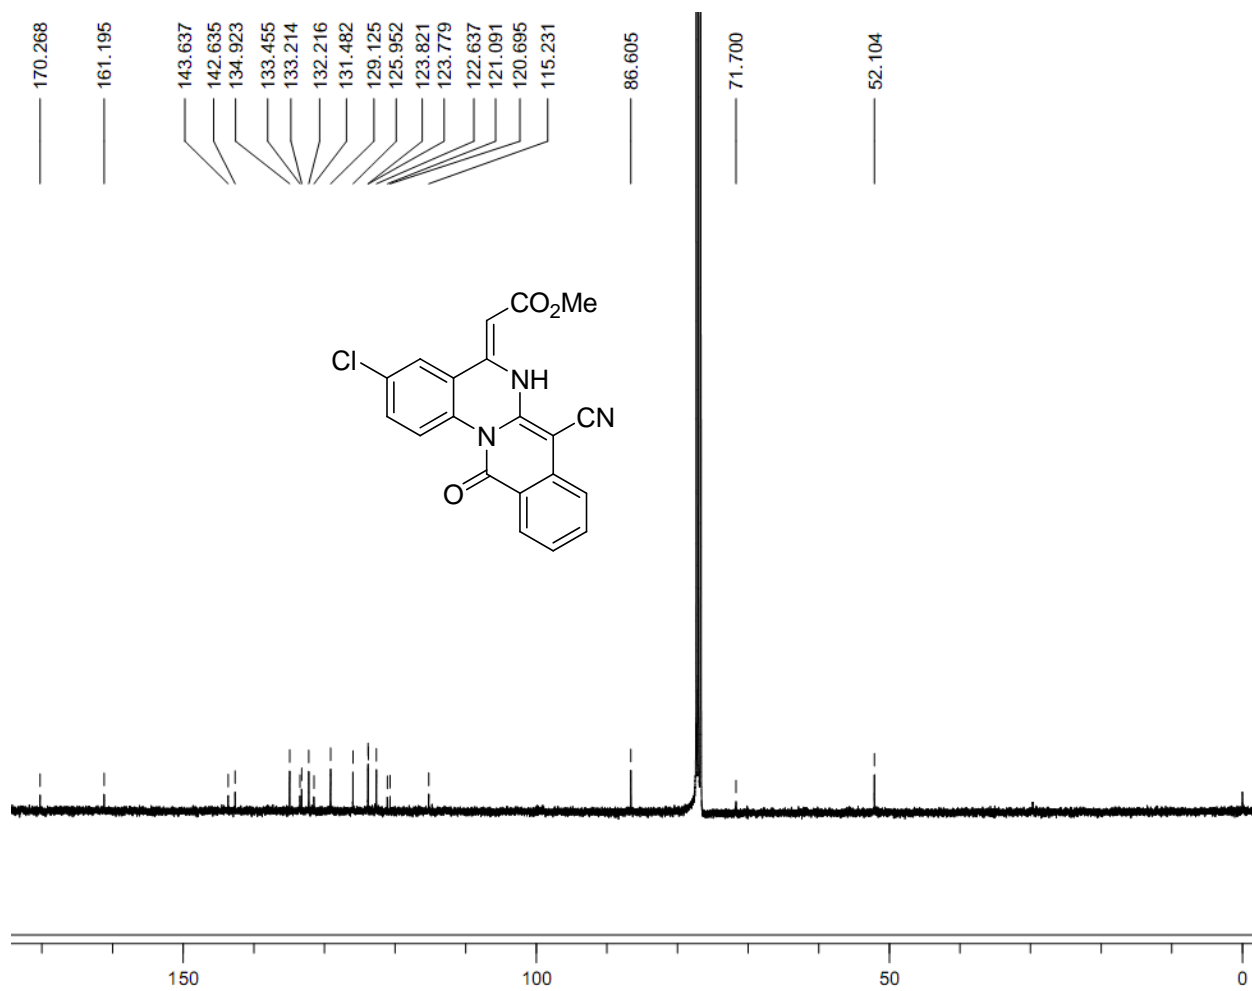

Fig. 87:  $^{13}\text{C}$  NMR spectra of compound **4e** ( $\text{CDCl}_3$ , 100 MHz)

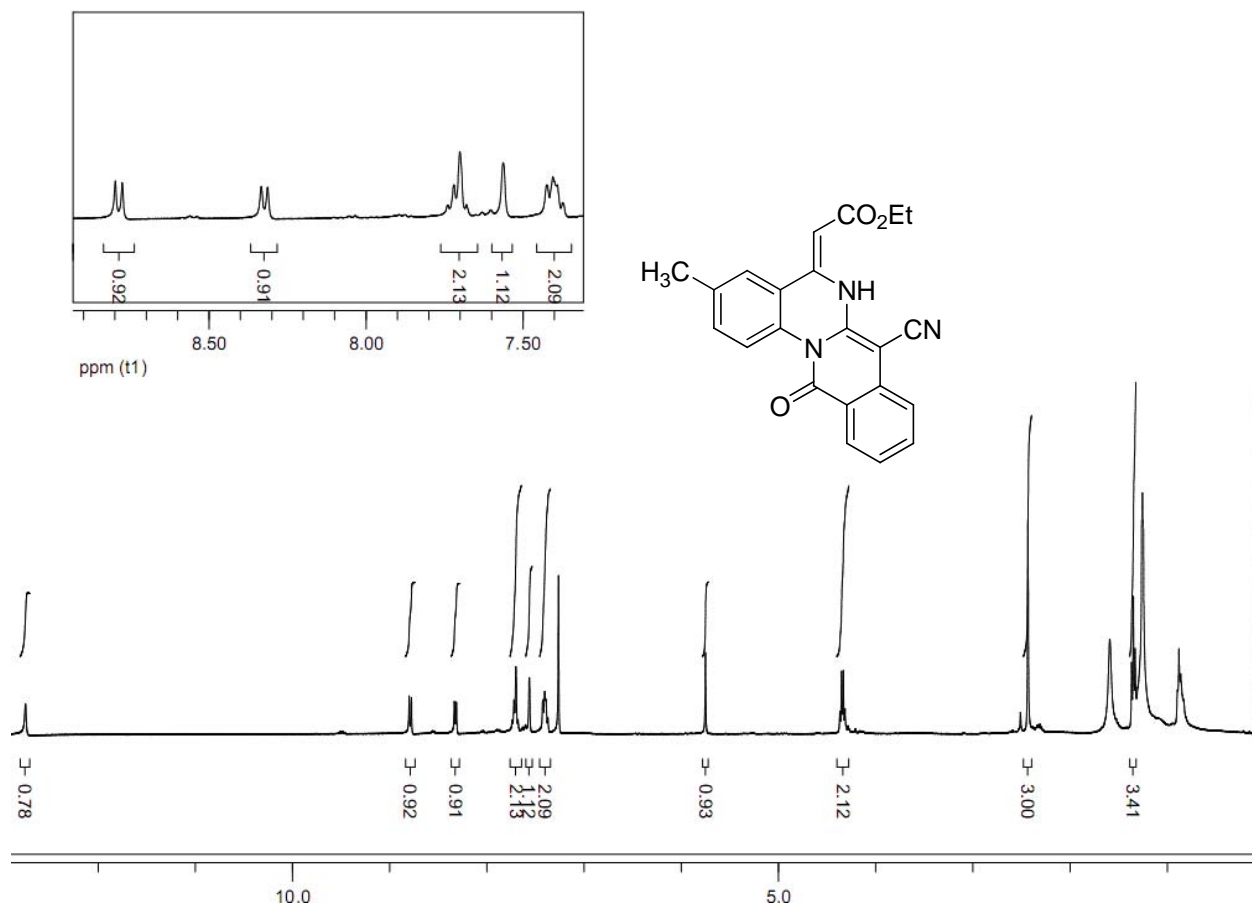

Fig. 88: <sup>1</sup>H NMR spectra of compound **4f** (CDCl<sub>3</sub>, 400 MHz)



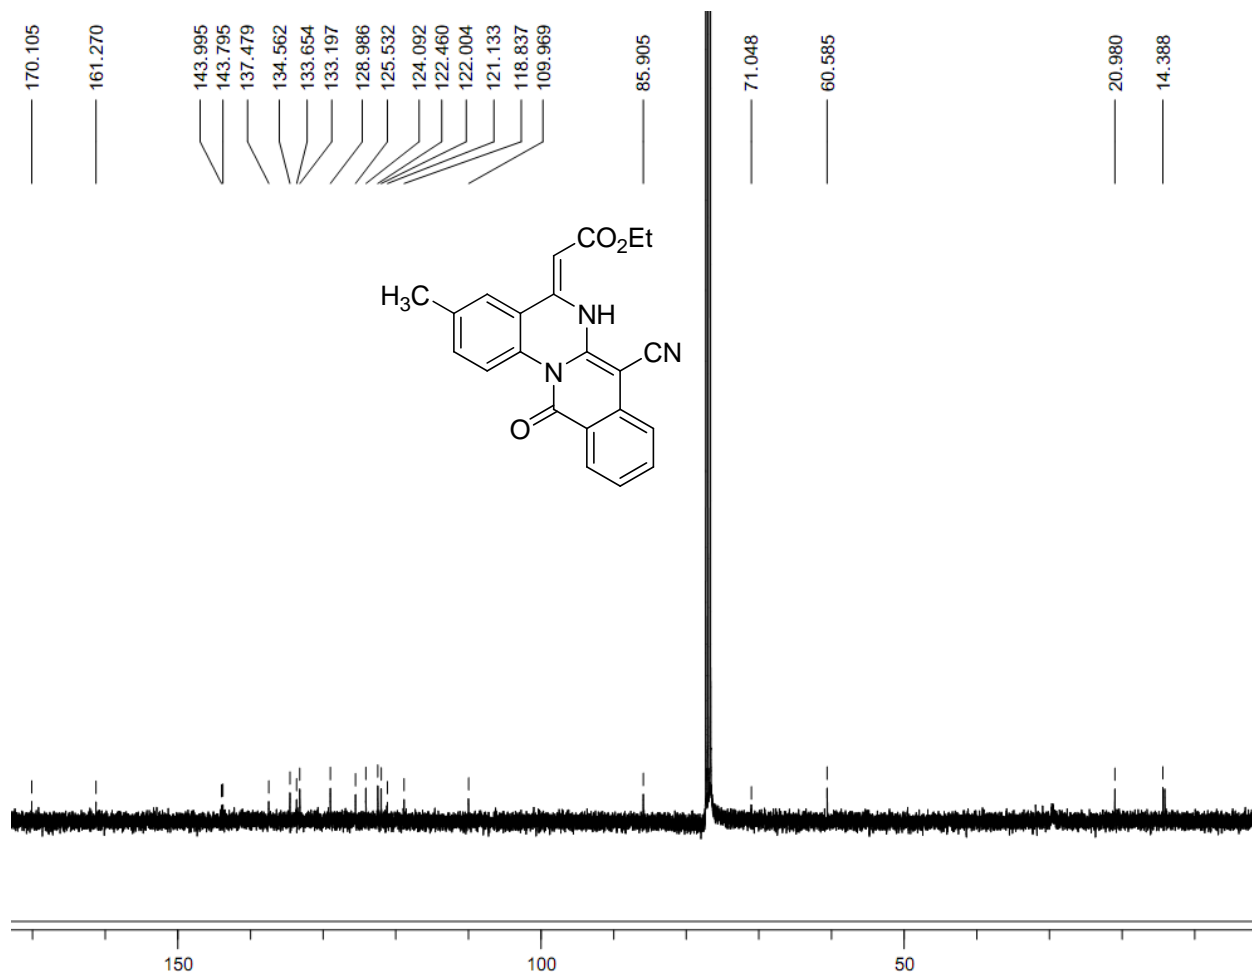

Fig. 89:  $^{13}\text{C}$  NMR spectra of compound **4f** ( $\text{CDCl}_3$ , 100 MHz)

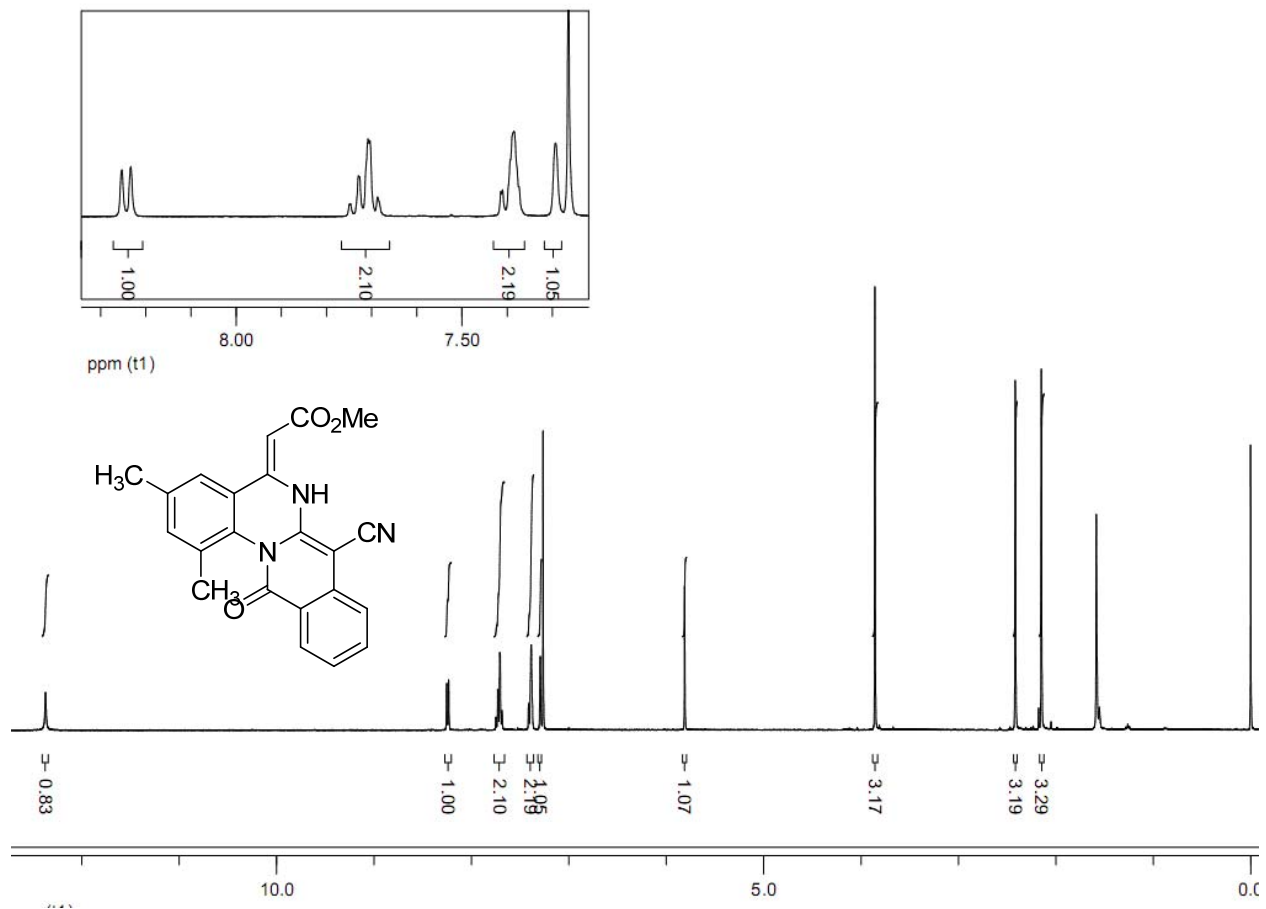

Fig. 90:  $^1\text{H}$  NMR spectra of compound **4g** (CDCl<sub>3</sub>, 400 MHz)

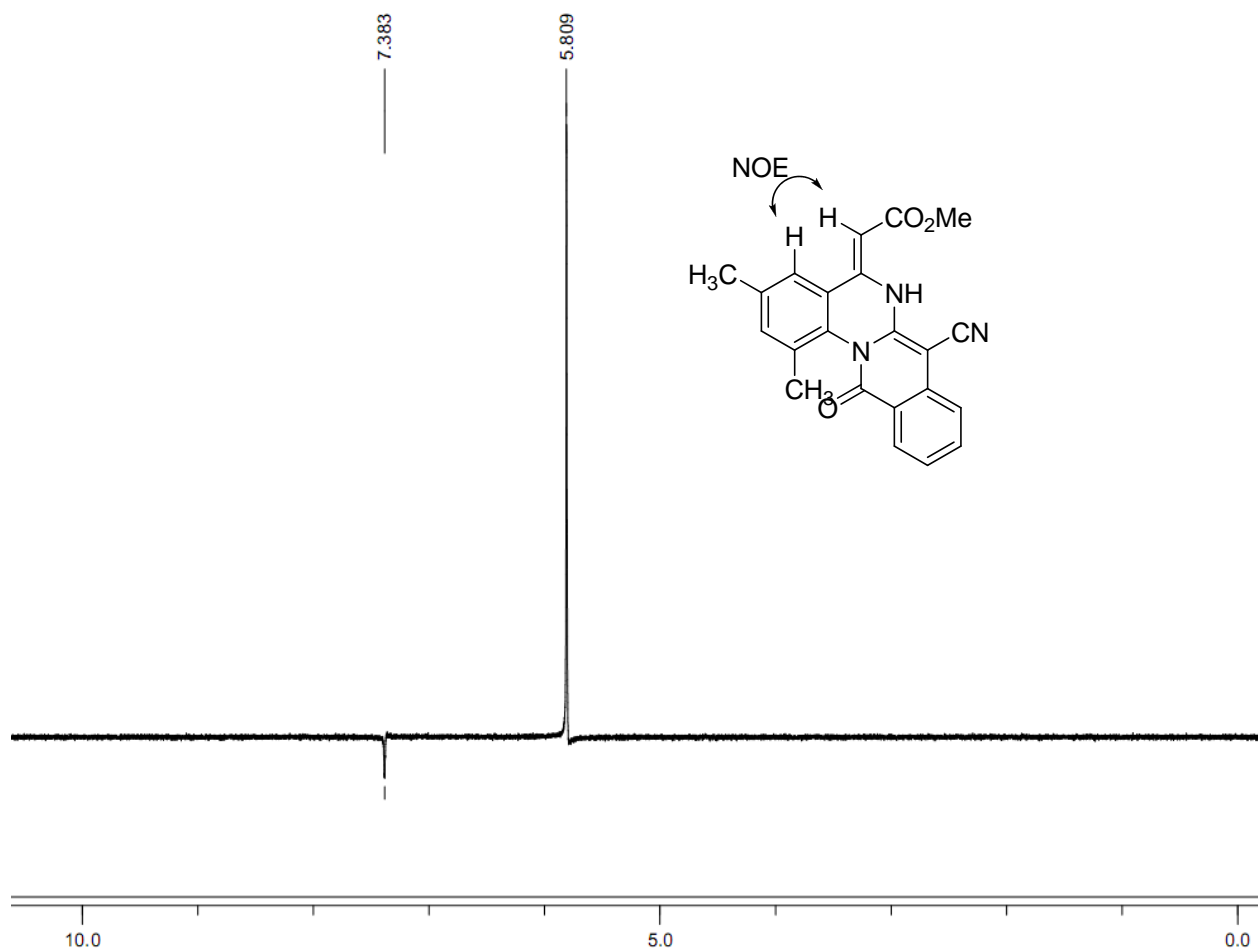

Fig. 91: 1D-NOE spectra of compound **4g** (CDCl<sub>3</sub>, 400 MHz)

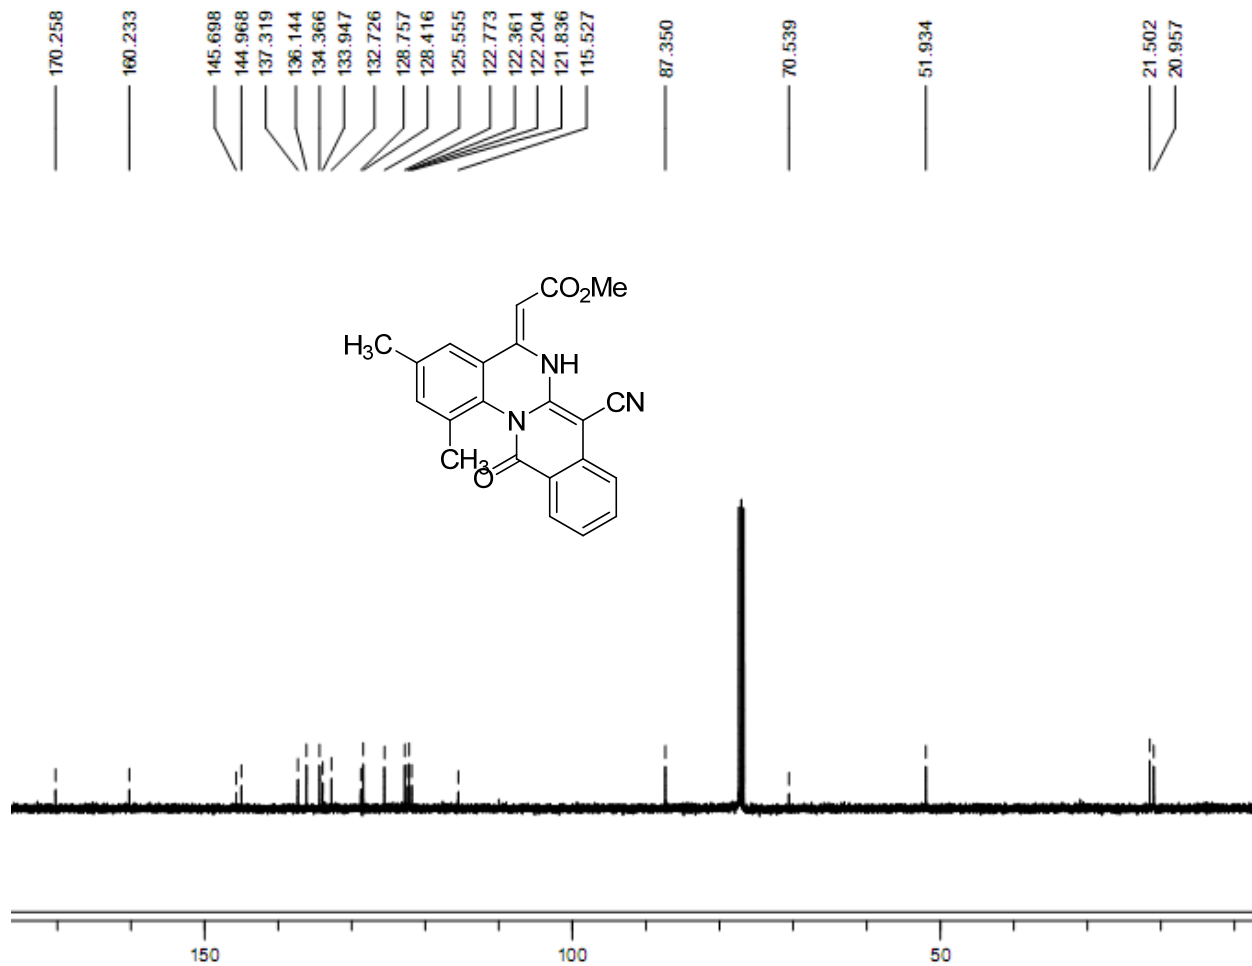

Fig. 92:  $^{13}\text{C}$  NMR spectra of compound **4g** ( $\text{CDCl}_3$ , 100 MHz)

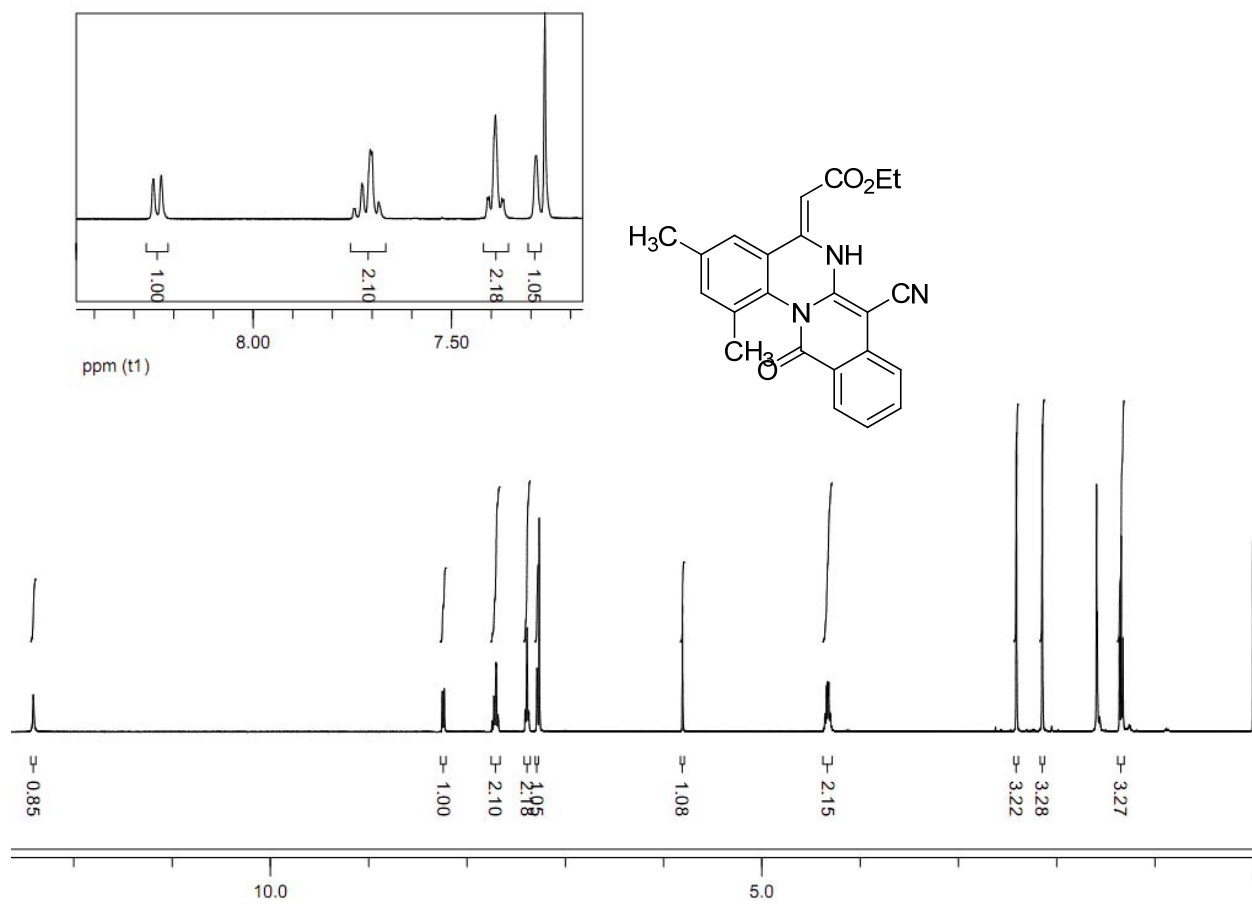

Fig. 93:  $^1\text{H}$  NMR spectra of compound **4h** ( $\text{CDCl}_3$ , 400 MHz)

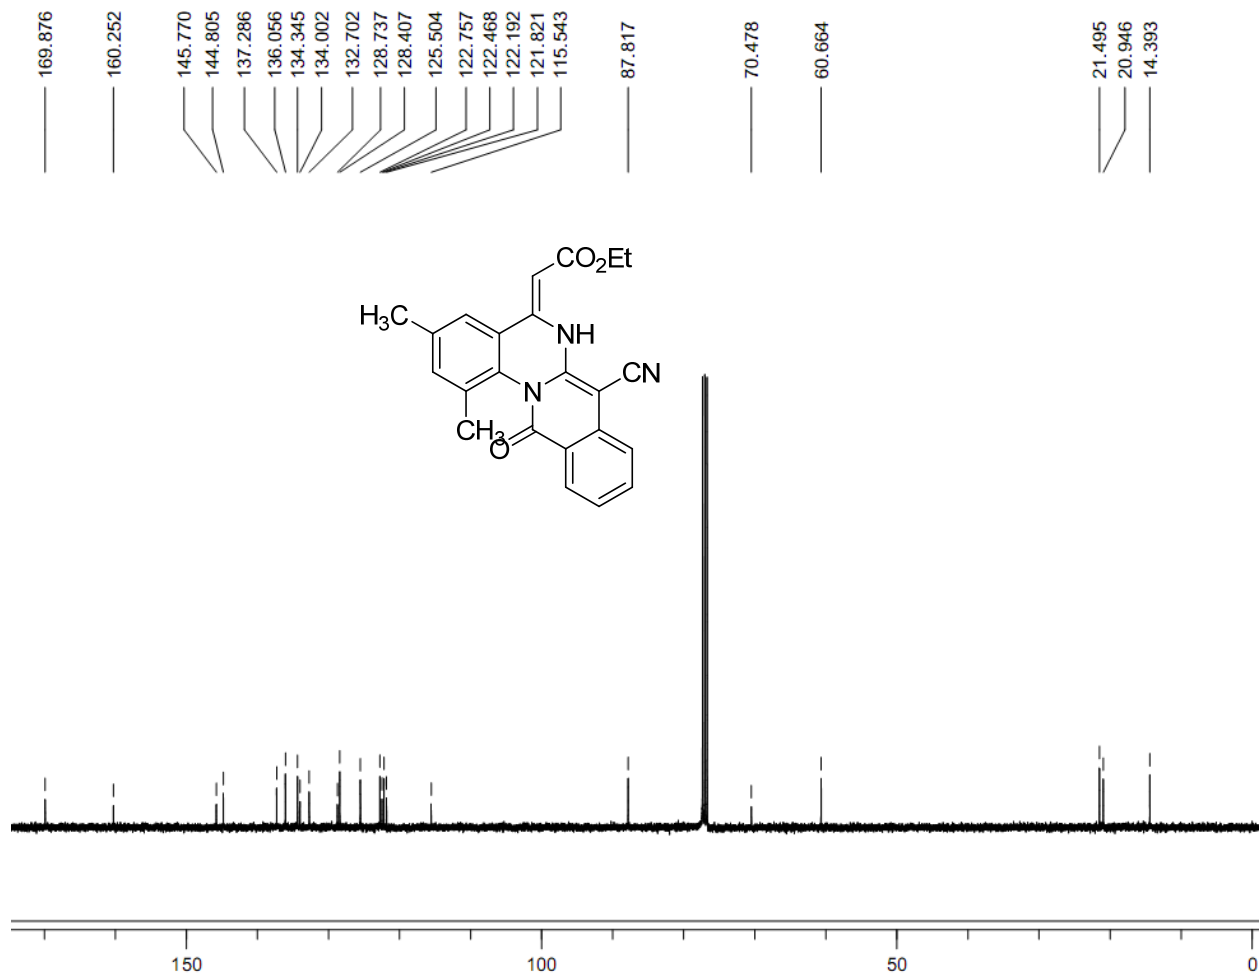

Fig. 94: <sup>13</sup>C NMR spectra of **4h** (CDCl<sub>3</sub>, 100 MHz)
