# Supplementary material for: A direct access to bioactive fused N-heterocyclic acetic acid derivatives
Source: Royal Society of Chemistry journal article supplement (doi:10.1039/c3ob42535e), 2014-01-01
Supplement: c3ob42535e3.pdf [file c3ob42535e3.pdf]

### Copies of Mass and HPLC spectra

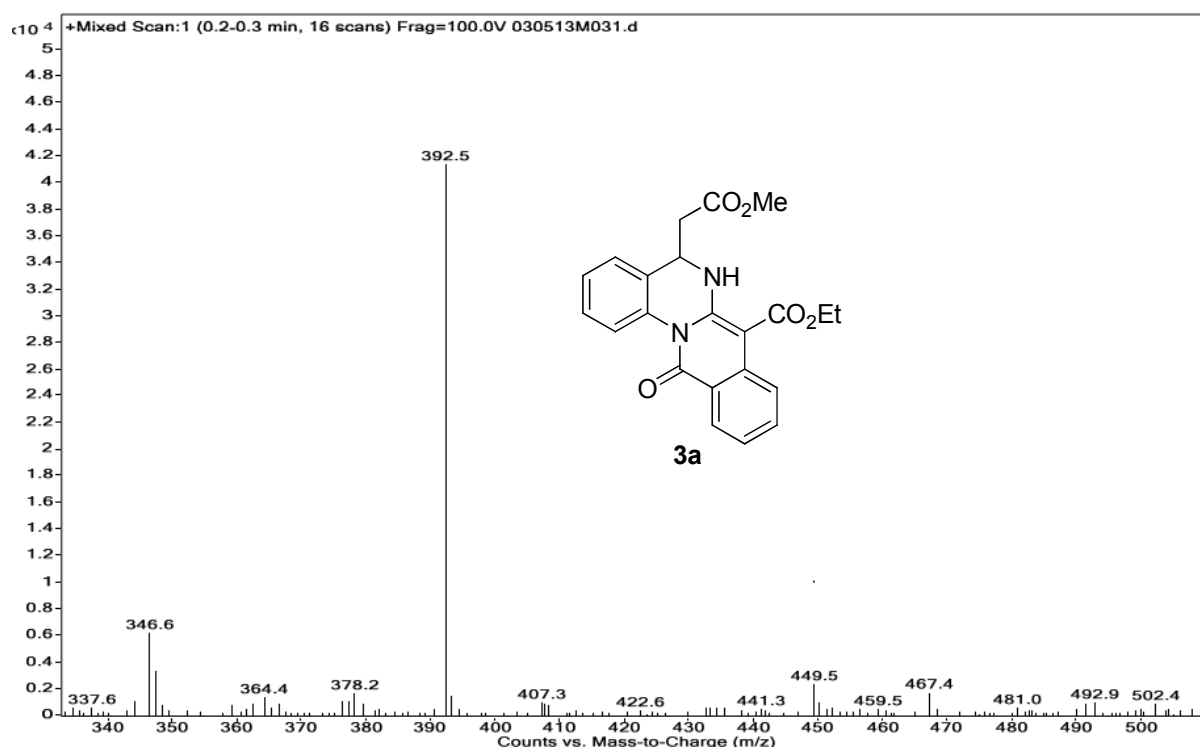

Injection Date : Thu, 27. Jun. 2013  
 Sample Name : ILS/ARJ/4/7  
 Acq Operator : RADHA  
 Acq. Method : D:\chem32\1\DATA\270613-MC 2013-06-27 18-24-09\C-18 ->  
 Analysis Method : D:\CHEM32\_002\1\METHODS\C-18 A50B50-GM.M  
 Method Info : Column : Symmetry C-18 75\*4.6mm,3.5µm  
 Mobile phase: A) 0.1% HCOOH in Water , B) ACN (gradient :  
 T/B%:0/50,0.5/50,6/98,10/98,10.5/50,12/50  
 Flow: 1.0 ml/min, Diluent: ACN:Water(90:10)

Seq Line : 4  
 Location : Vial 55  
 Inj. No. : 1  
 Inj. Vol. : 10 µl

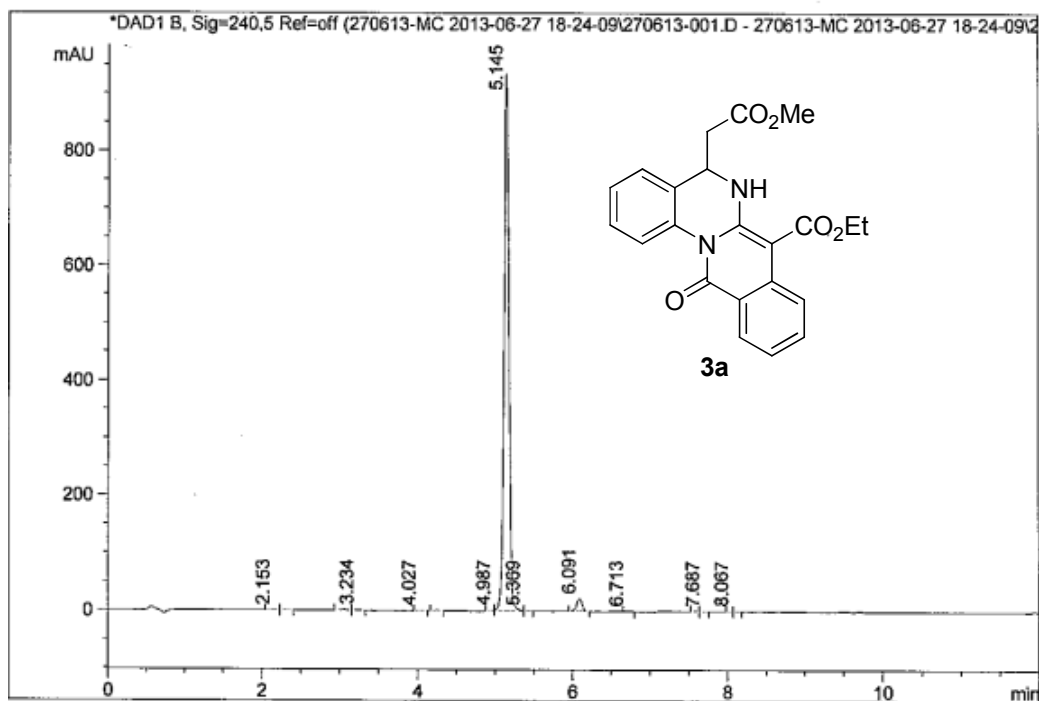

Signal 1: DAD1 B, Sig=240,5 Ref=off

| Peak # | RT [min] | Area     | Area % |
|--------|----------|----------|--------|
| 1      | 2.153    | 3.769    | 0.088  |
| 2      | 2.296    | 3.424    | 0.080  |
| 3      | 3.061    | 12.616   | 0.296  |
| 4      | 3.234    | 7.844    | 0.184  |
| 5      | 4.027    | 2.635    | 0.062  |
| 6      | 4.254    | 3.877    | 0.091  |
| 7      | 4.987    | 4.508    | 0.106  |
| 8      | 5.145    | 4112.732 | 96.383 |
| 9      | 5.369    | 2.093    | 0.049  |
| 10     | 6.091    | 103.477  | 2.425  |
| 11     | 6.713    | 3.854    | 0.090  |
| 12     | 7.587    | 1.910    | 0.045  |

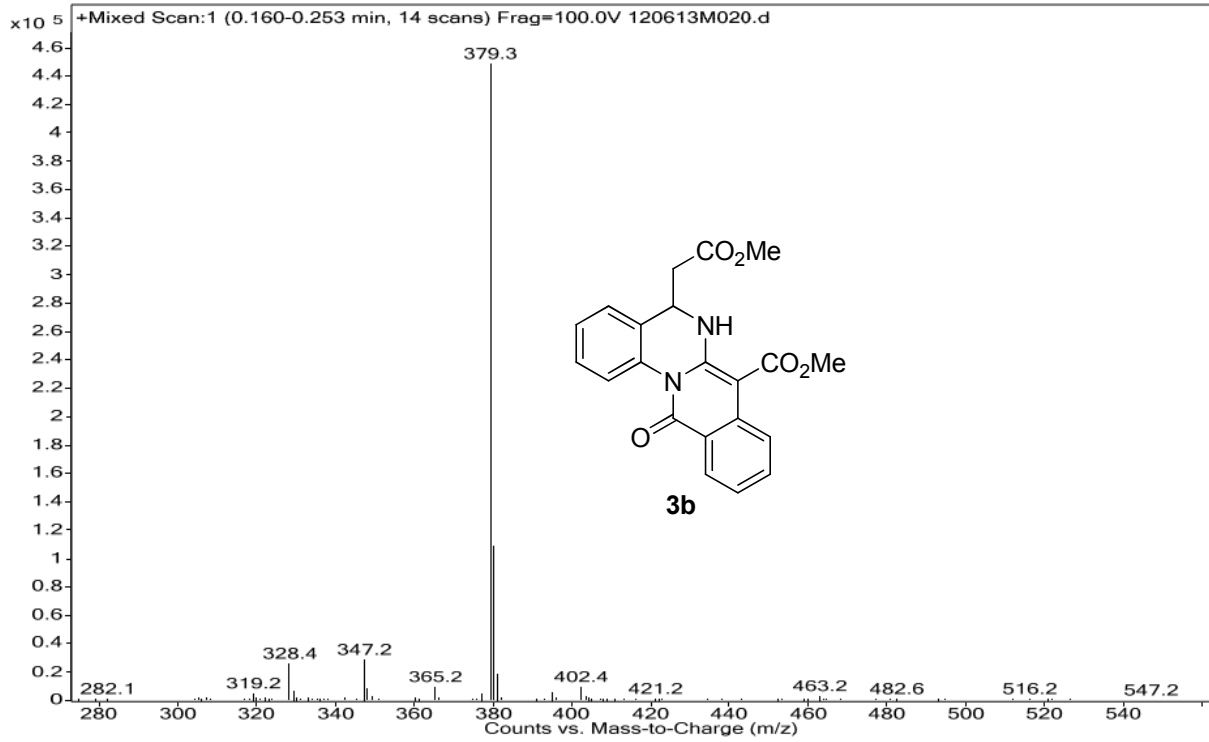

Injection Date : Thu, 27. Jun. 2013  
 Sample Name : ILS/ARJ/4/8  
 Acq Operator : RADHA  
 Acq. Method : D:\chem32\1\DATA\270613-MC 2013-06-27 18-24-09\C-18 ->  
 Analysis Method : D:\CHEM32\_002\1\METHODS\C-18 A50B50-GM.M  
 Method Info : Column : Symmetry C-18 75\*4.6mm,3.5µm  
 Mobile phase: A) 0.1% HCOOH in Water , B) ACN (gradient )  
 T/B%:0/50,0.5/50,6/98,10/98,10.5/50,12/50  
 Flow: 1.0 ml/min, Diluent: ACN:Water(90:10)

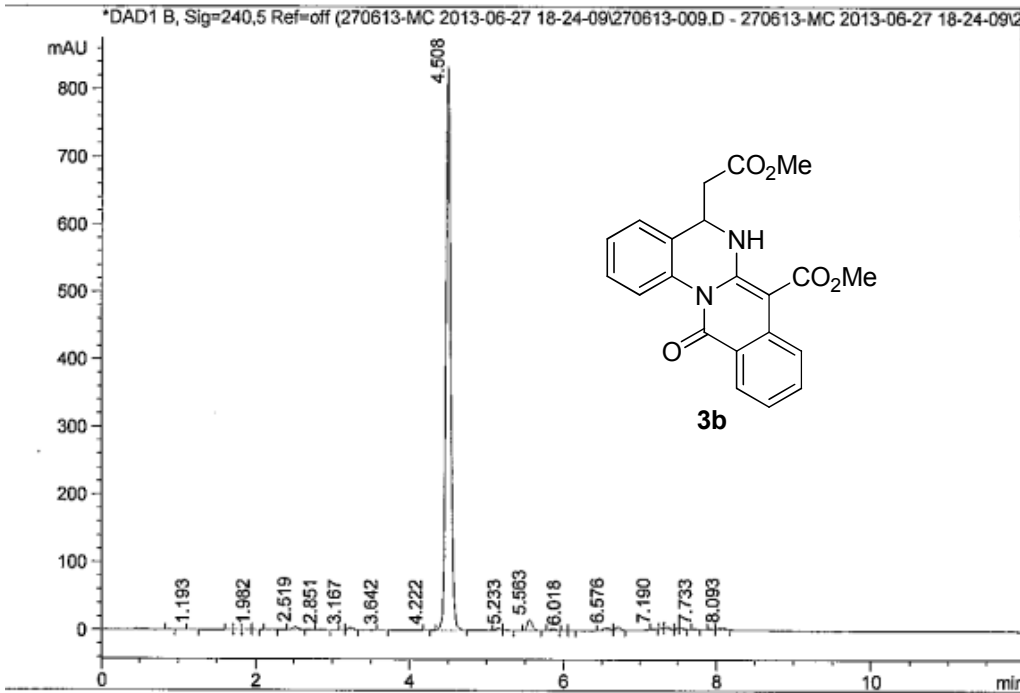

| Peak # | RT [min] | Area     | Area % |
|--------|----------|----------|--------|
| 13     | 4.222    | 1.095    | 0.029  |
| 14     | 4.508    | 3555.338 | 93.067 |
| 15     | 5.155    | 15.418   | 0.404  |
| 16     | 5.233    | 5.989    | 0.157  |
| 17     | 5.563    | 67.777   | 1.774  |
| 18     | 5.871    | 11.824   | 0.310  |
| 19     | 6.018    | 1.586    | 0.042  |
| 20     | 6.096    | 1.571    | 0.041  |
| 21     | 6.576    | 24.082   | 0.630  |
| 22     | 6.718    | 25.350   | 0.664  |
| 23     | 7.190    | 3.480    | 0.091  |
| 24     | 7.313    | 3.784    | 0.099  |
| 25     | 7.367    | 12.120   | 0.317  |
| 26     | 7.520    | 4.957    | 0.130  |
| 27     | 7.549    | 7.164    | 0.188  |

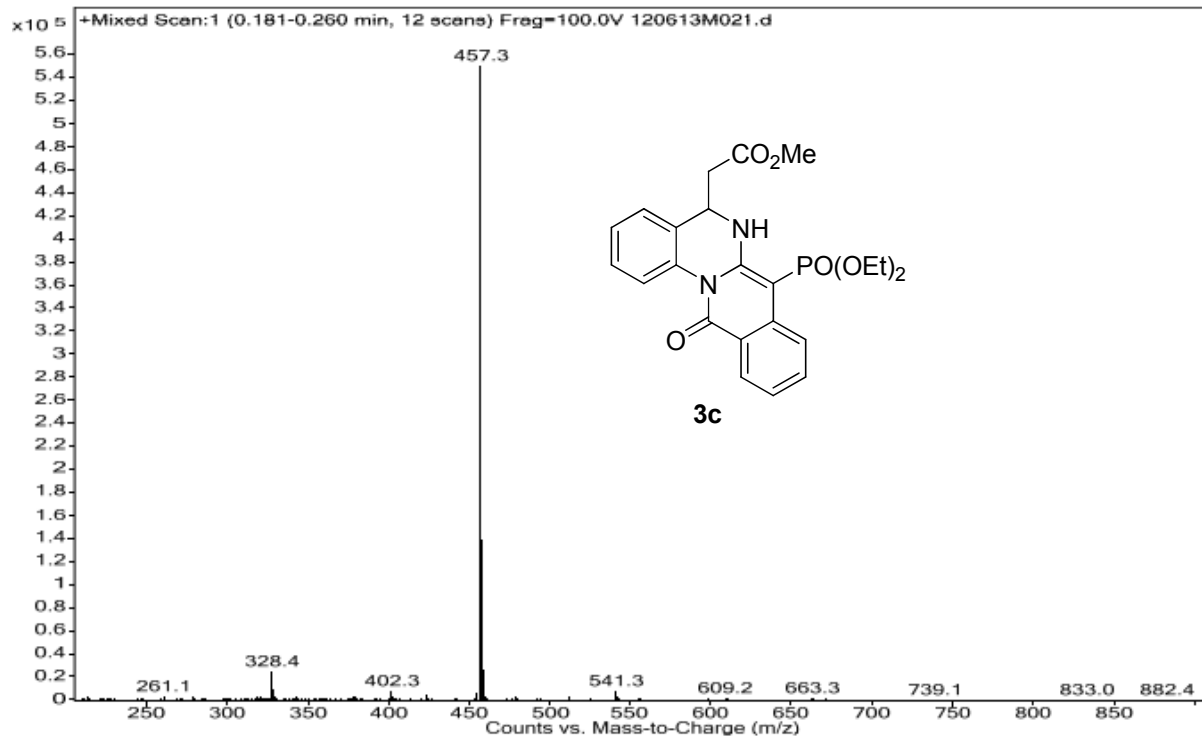

Injection Date : Thu, 27. Jun. 2013  
 Sample Name : ILS/ARJ/4/9  
 Acq Operator : RADHA  
 Acq. Method : D:\chem32\1\DATA\270613-MC 2013-06-27 18-24-09\C-18 ->  
 Analysis Method : D:\CHEM32\_002\1\METHODS\C-18 A50B50-GM.M  
 Method Info : Column : Symmetry C-18 75\*4.6mm,3.5µm  
 Mobile phase: A) 0.1% HCOOH in Water , B) ACN (gradient )  
 T/B%:0/50,0.5/50,6/98,10/98,10.5/50,12/50  
 Flow: 1.0 ml/min, Diluent: ACN:Water(90:10)

Seq Line : 6  
 Location : Vial 56  
 Inj. No. : 1  
 Inj. Vol. : 10 µl

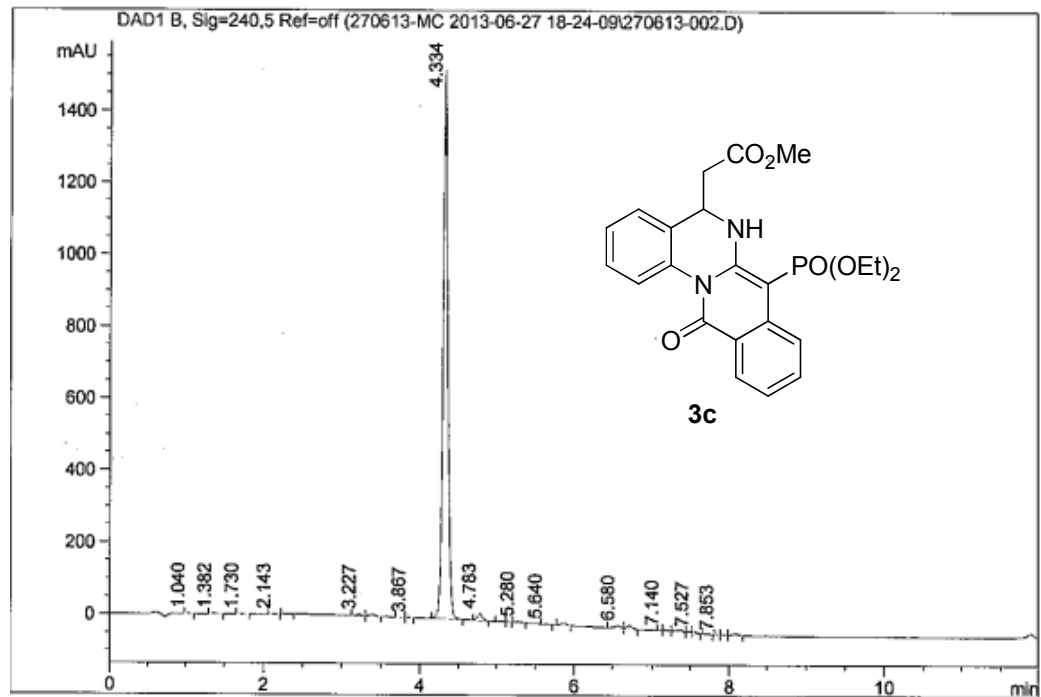

| Peak # | RT [min] | Area     | Area % |
|--------|----------|----------|--------|
| 1      | 1.040    | 3.235    | 0.046  |
| 2      | 1.382    | 6.996    | 0.100  |
| 3      | 1.730    | 3.961    | 0.056  |
| 4      | 2.143    | 2.270    | 0.032  |
| 5      | 2.310    | 1.422    | 0.020  |
| 6      | 3.227    | 17.270   | 0.246  |
| 7      | 3.393    | 25.007   | 0.356  |
| 8      | 3.753    | 2.609    | 0.037  |
| 9      | 3.867    | 2.724    | 0.039  |
| 10     | 4.334    | 6623.116 | 94.279 |
| 11     | 4.783    | 79.991   | 1.139  |
| 12     | 5.073    | 5.001    | 0.071  |
| 13     | 5.133    | 1.790    | 0.025  |
| 14     | 5.280    | 10.680   | 0.152  |
| 15     | 5.640    | 3.094    | 0.044  |
| 16     | 5.873    | 22.579   | 0.321  |
| 17     | 6.580    | 44.412   | 0.632  |
| 18     | 6.720    | 48.563   | 0.691  |
| 19     | 7.140    | 4.010    | 0.057  |
| 20     | 7.193    | 16.121   | 0.229  |
| 21     | 7.367    | 36.118   | 0.514  |
| 22     | 7.527    | 9.003    | 0.128  |
| 23     | 7.553    | 12.228   | 0.174  |
| 24     | 7.740    | 5.596    | 0.080  |
| 25     | 7.853    | 1.759    | 0.025  |
| 26     | 7.940    | 7.374    | 0.105  |

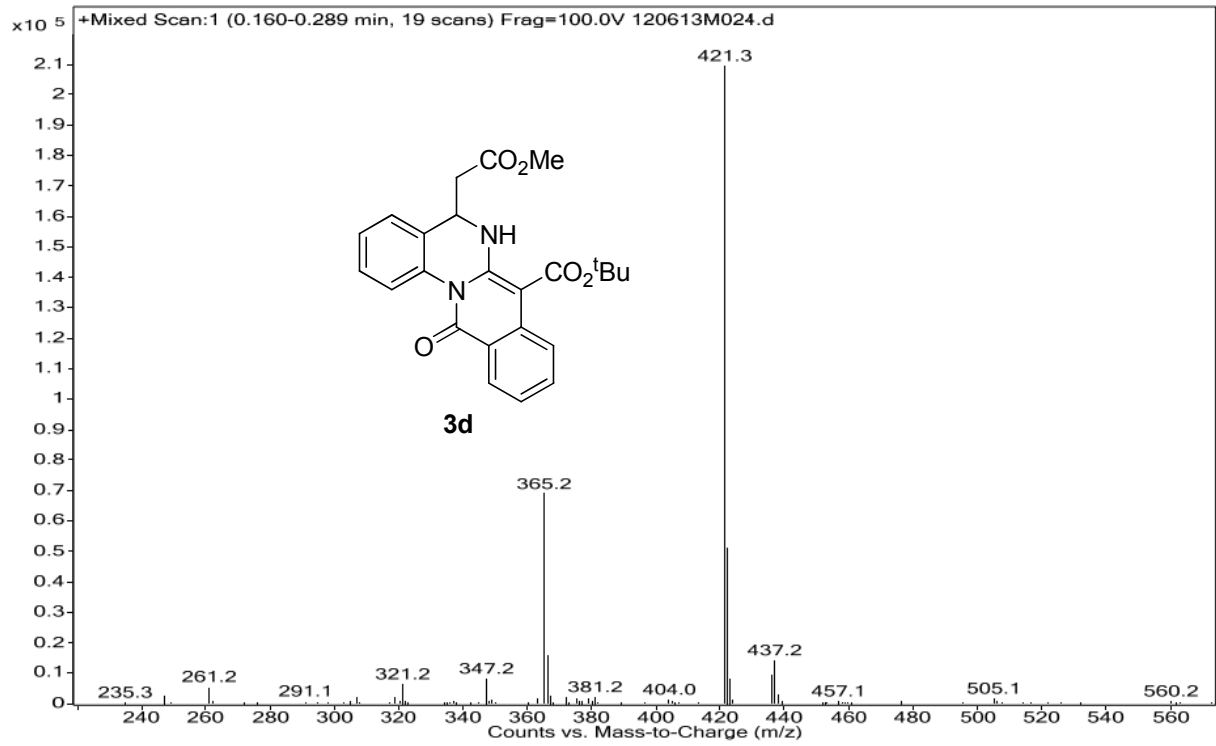

Injection Date : Thu, 27. Jun. 2013  
 Sample Name : ILS/ARJ/4/19  
 Acq Operator : RADHA  
 Acq. Method : D:\chem32\1\DATA\270613-MC 2013-06-27 18-24-09\C-18 ->  
 Analysis Method : D:\CHEM32\_002\1\METHODS\C-18 A50B50-GM.M  
 Method Info : Column : Symmetry C-18 75\*4.6mm, 3.5µm  
 Mobile phase: A) 0.1% HCOOH in Water , B) ACN (gradient )  
 T/B%:0/50,0.5/50,6/98,10/98,10.5/50,12/50  
 Flow: 1.0 ml/min, Diluent: ACN:Water(90:10)

Seq Line : 7  
 Location : Vial 57  
 Inj. No. : 1  
 Inj. Vol. : 10 µl

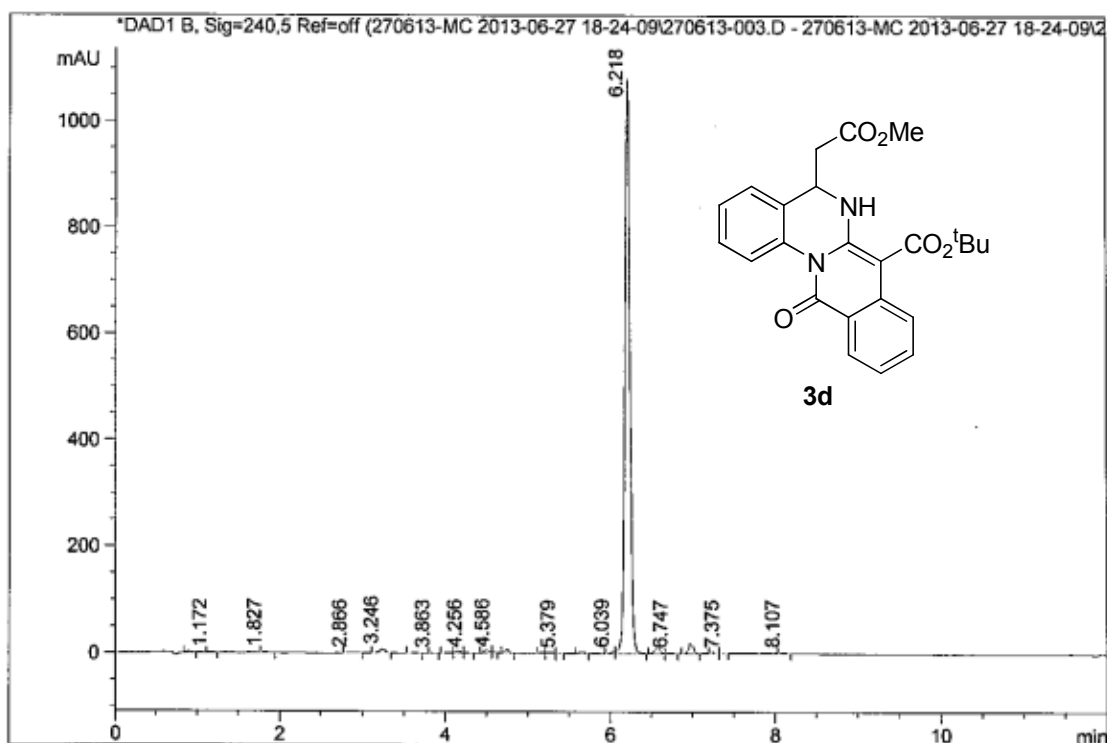

| Peak # | RT [min] | Area     | Area % |
|--------|----------|----------|--------|
| 10     | 4.256    | 4.152    | 0.085  |
| 11     | 4.500    | 23.649   | 0.487  |
| 12     | 4.586    | 3.196    | 0.066  |
| 13     | 4.748    | 21.904   | 0.451  |
| 14     | 5.169    | 5.477    | 0.113  |
| 15     | 5.268    | 12.703   | 0.261  |
| 16     | 5.379    | 1.684    | 0.035  |
| 17     | 5.655    | 14.256   | 0.293  |
| 18     | 6.039    | 8.340    | 0.172  |
| 19     | 6.218    | 4524.853 | 93.112 |
| 20     | 6.578    | 53.994   | 1.111  |
| 21     | 6.747    | 4.323    | 0.089  |
| 22     | 6.986    | 76.926   | 1.583  |
| 23     | 7.258    | 2.666    | 0.055  |



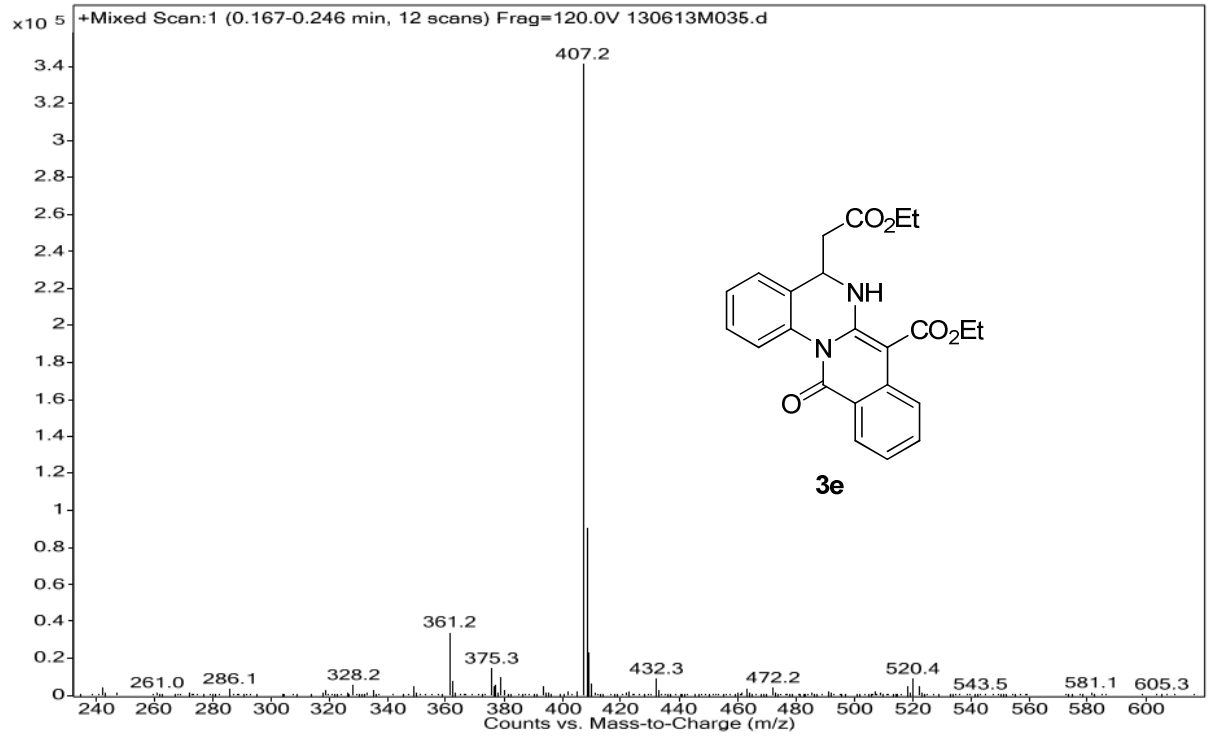

Injection Date : Thu, 27. Jun. 2013  
 Sample Name : ILS/ARJ/4/26  
 Acq Operator : RADHA  
 Acq. Method : D:\chem32\1\DATA\270613-MC 2013-06-27 18-24-09\C-18 ->  
 Analysis Method : D:\CHEM32\_002\1\METHODS\C-18 A50B50-GM.M  
 Method Info : Column : Symmetry C-18 75\*4.6mm,3.5µm  
 Mobile phase: A) 0.1% HCOOH in Water , B) ACN (gradient )  
 T/B%:0/50,0.5/50,6/98,10/98,10.5/50,12/50  
 Flow: 1.0 ml/min, Diluent: ACN:Water(90:10)

Seq Line : 8  
 Location : Vial 58  
 Inj. No. : 1  
 Inj. Vol. : 5 µl

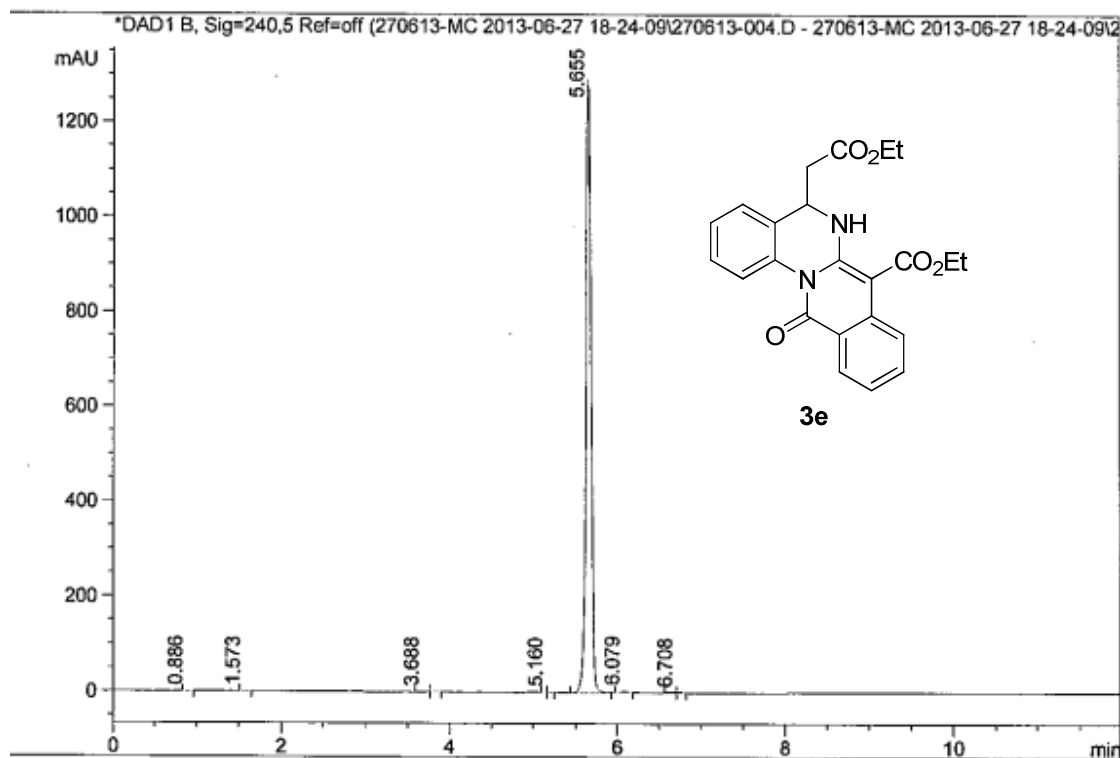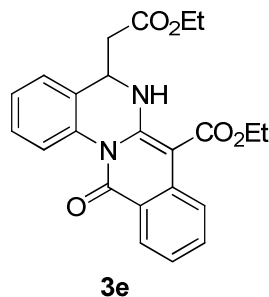

Signal 1: DAD1 B, Sig=240,5 Ref=off

| Peak # | RT [min] | Area     | Area % |
|--------|----------|----------|--------|
| 1      | 0.886    | 1.692    | 0.031  |
| 2      | 1.573    | 1.273    | 0.023  |
| 3      | 3.688    | 2.461    | 0.045  |
| 4      | 3.841    | 1.456    | 0.027  |
| 5      | 5.160    | 1.198    | 0.022  |
| 6      | 5.198    | 1.955    | 0.036  |
| 7      | 5.655    | 5419.660 | 99.394 |
| 8      | 6.079    | 15.761   | 0.289  |
| 9      | 6.651    | 5.412    | 0.099  |
| 10     | 6.708    | 1.828    | 0.034  |

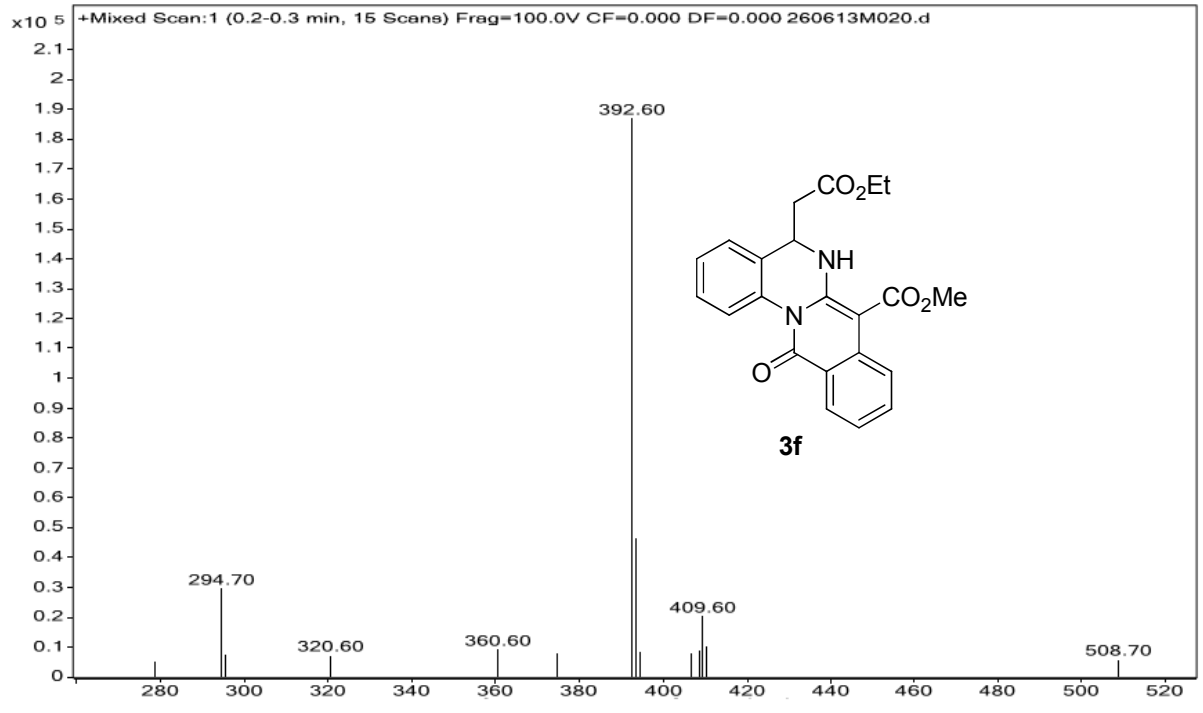

Injection Date : Thu, 27. Jun. 2013  
 Sample Name : ILS/ARJ/4/27  
 Acq Operator : RADHA  
 Acq. Method : D:\chem32\1\DATA\270613-MC 2013-06-27 18-24-09\C-18 ->  
 Analysis Method : D:\CHEM32\_002\1\METHODS\C-18 A50B50-GM.M  
 Method Info : Column : Symmetry C-18 75\*4.6mm,3.5µm  
 Mobile phase: A) 0.1% HCOOH in Water , B) ACN (gradient )  
 T/B%:0/50,0.5/50,6/98,10/98,10.5/50,12/50  
 Flow: 1.0 ml/min, Diluent: ACN:Water(90:10)

seq Line : 9  
 Location : Vial 59  
 Inj. No. : 1  
 Inj. Vol. : 5 µl

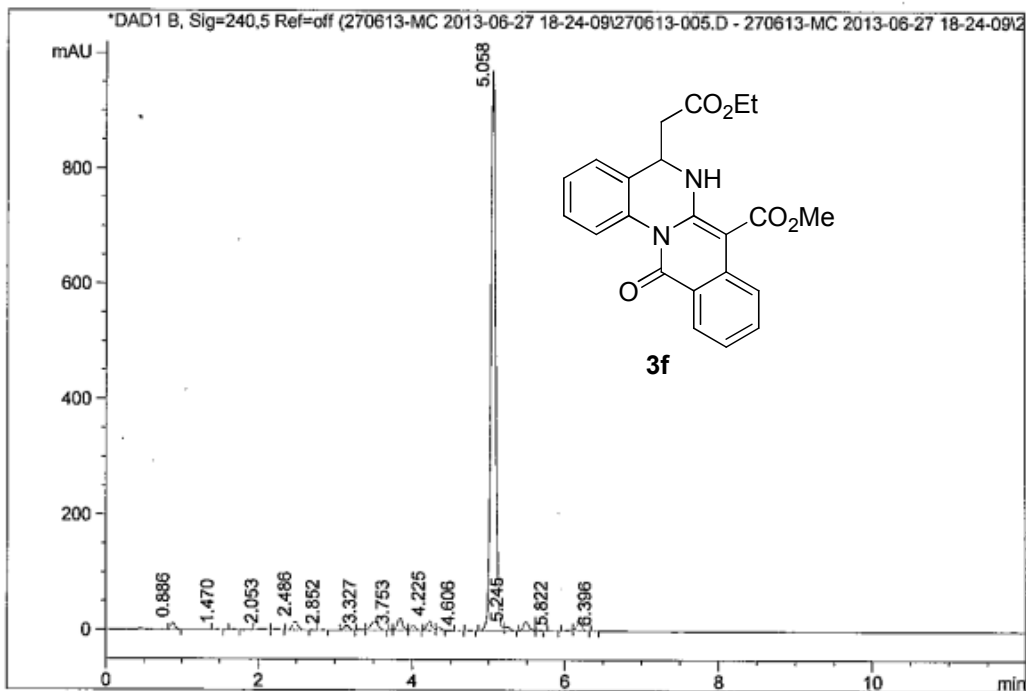

Signal 1: DAD1 B, Sig=240,5 Ref=off

| Peak # | RT [min] | Area   | Area % | Peak # | RT [min] | Area     | Area % |
|--------|----------|--------|--------|--------|----------|----------|--------|
| 13     | 4.016    | 33.105 | 0.687  | 14     | 4.225    | 23.643   | 0.424  |
| 14     | 0.886    | 37.797 | 0.784  | 15     | 4.353    | 17.878   | 0.371  |
| 15     | 1.470    | 3.598  | 0.075  | 16     | 4.606    | 1.380    | 0.029  |
| 16     | 1.678    | 3.700  | 0.077  | 17     | 4.749    | 5.139    | 0.107  |
| 17     | 2.053    | 9.008  | 0.187  | 18     | 5.058    | 4330.458 | 91.696 |
| 18     | 2.241    | 10.078 | 0.209  | 19     | 5.245    | 28.228   | 0.586  |
| 19     | 2.486    | 23.869 | 0.450  | 20     | 5.486    | 23.525   | 0.422  |
| 20     | 2.852    | 3.060  | 0.063  | 21     | 5.653    | 4.947    | 0.103  |
| 21     | 3.156    | 34.421 | 0.714  | 22     | 5.822    | 2.338    | 0.049  |
| 22     | 3.327    | 5.200  | 0.108  | 23     | 6.083    | 11.514   | 0.239  |
| 23     | 3.513    | 91.685 | 1.902  | 24     | 6.187    | 33.875   | 0.699  |
| 24     | 3.753    | 1.613  | 0.033  | 25     | 6.396    | 1.431    | 0.030  |
| 25     | 3.842    | 94.431 | 1.959  |        |          |          |        |

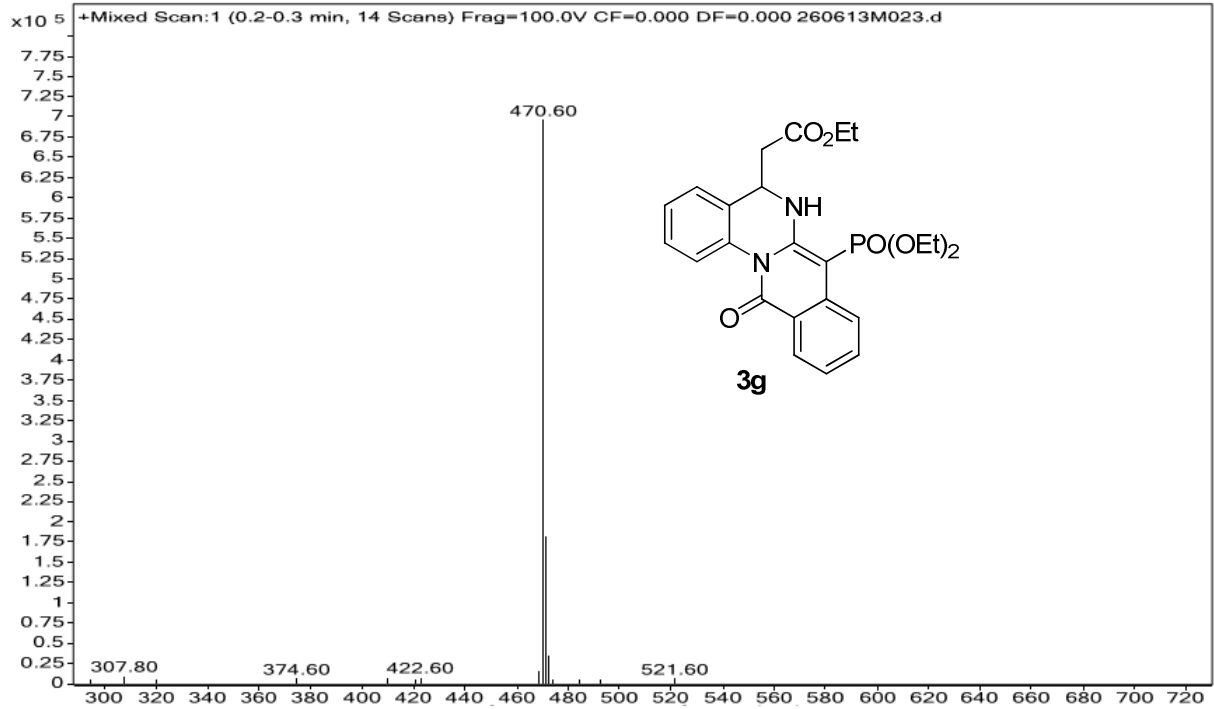

Injection Date : Thu, 27. Jun. 2013  
 Sample Name : ILS/ARJ/4/32  
 Acq Operator : RADHA  
 Acq. Method : D:\CHEM32\_002\1\METHODS\C-18 A50B50-GM.M  
 Analysis Method : D:\CHEM32\_002\1\METHODS\C-18 A50B50-GM.M  
 Method Info : Column : Symmetry C-18 75\*4.6mm,3.5µm  
 Mobile phase: A) 0.1% HCOOH in Water , B) ACN (gradient )  
 T/B%:0/50,0.5/50,6/98,10/98,10.5/50,12/50  
 Flow: 1.0 ml/min, Diluent: ACN:Water(90:10)

Seq Line : 0  
 Location : Vial 77  
 Inj. No. : 0  
 Inj. Vol. : 5 µl

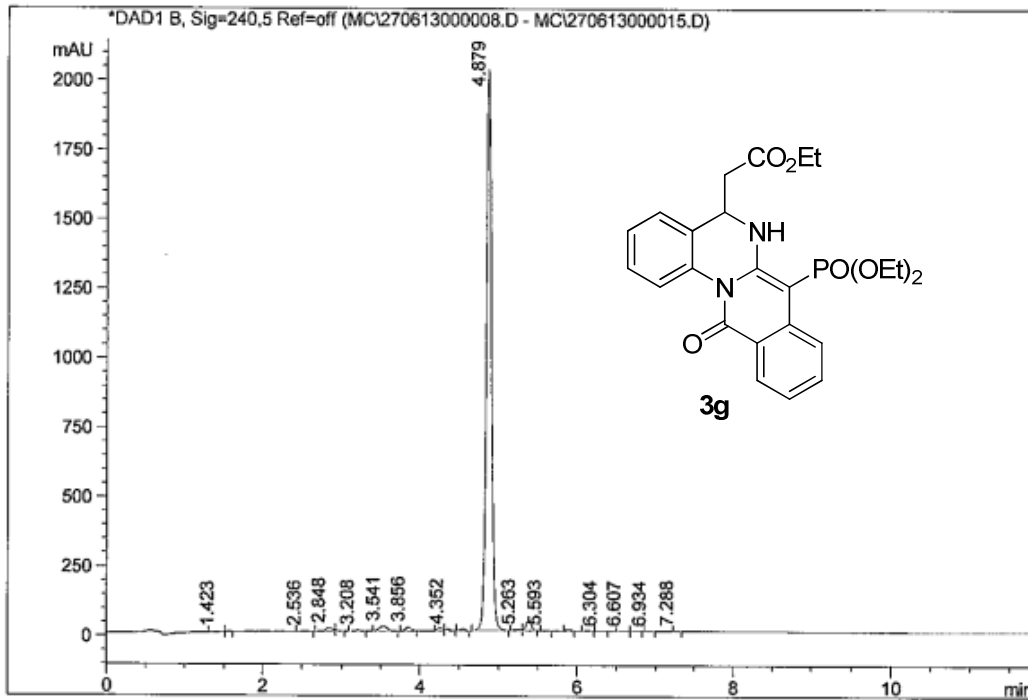

Signal 1: DAD1 B, Sig=240,5 Ref=off

| Peak # | RT [min] | Area     | Area % | Peak # | RT [min] | Area    | Area % |
|--------|----------|----------|--------|--------|----------|---------|--------|
| 1      | 1.423    | 7.018    | 0.071  | 13     | 5.263    | 21.307  | 0.217  |
| 2      | 1.561    | 2.366    | 0.024  | 14     | 5.385    | 186.534 | 1.898  |
| 3      | 2.536    | 7.908    | 0.080  | 15     | 5.593    | 12.081  | 0.123  |
| 4      | 2.848    | 70.908   | 0.722  | 16     | 5.896    | 26.095  | 0.266  |
| 5      | 2.926    | 12.100   | 0.123  | 17     | 6.140    | 8.585   | 0.087  |
| 6      | 3.208    | 20.900   | 0.213  | 18     | 6.304    | 2.331   | 0.024  |
| 7      | 3.541    | 121.863  | 1.240  | 19     | 6.607    | 6.660   | 0.068  |
| 8      | 3.856    | 66.339   | 0.675  | 20     | 6.740    | 6.423   | 0.065  |
| 9      | 4.262    | 42.544   | 0.433  | 21     | 6.934    | 3.216   | 0.033  |
| 10     | 4.352    | 21.515   | 0.219  | 22     | 7.288    | 2.937   | 0.030  |
| 11     | 4.548    | 28.072   | 0.286  |        |          |         |        |
| 12     | 4.879    | 9148.242 | 93.103 |        |          |         |        |

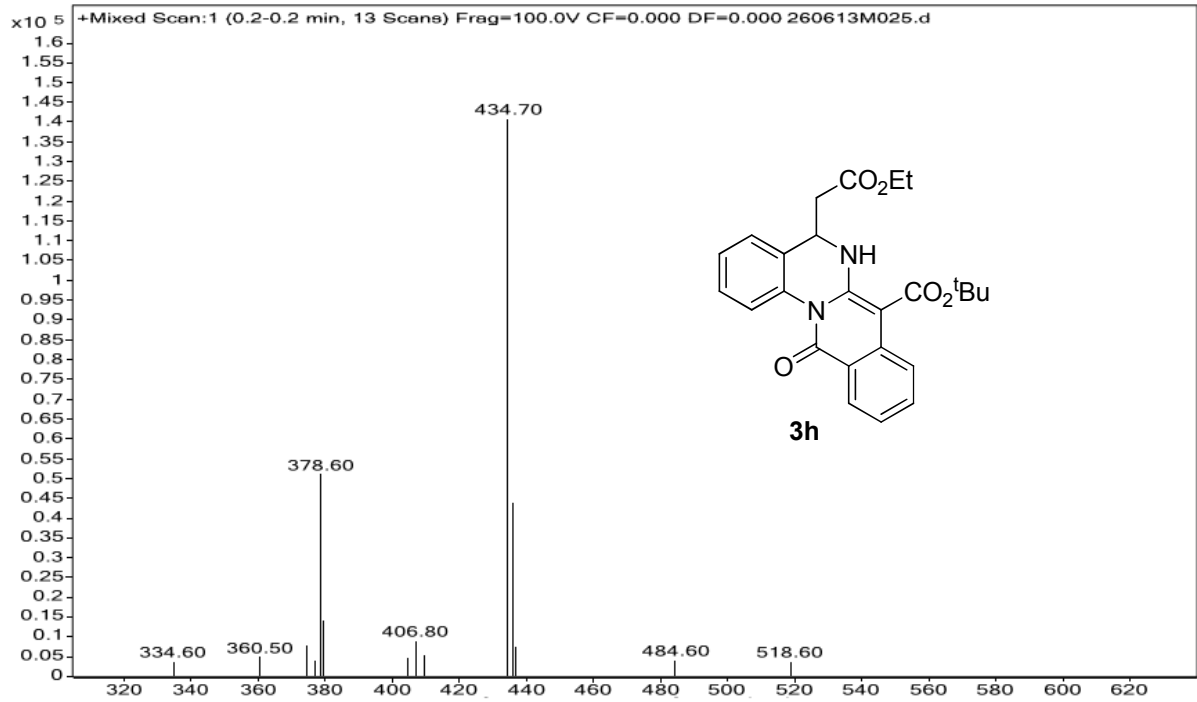

Injection Date : Thu, 27. Jun. 2013  
 Sample Name : ILS/ARJ/4/34  
 Acq Operator : RADHA  
 Acq. Method : D:\CHEM32\_002\1\METHODS\C-18 A50B50-GM.M  
 Analysis Method : D:\CHEM32\_002\1\METHODS\C-18 A50B50-GM.M  
 Method Info : Column : Symmetry C-18 75\*4.6mm,3.5µm  
 Mobile phase: A) 0.1% HCOOH in Water , B) ACN (gradient )  
 T/B%:0/50,0.5/50,6/98,10/98,10.5/50,12/50  
 Flow: 1.0 ml/min, Diluent: ACN:Water(90:10)

Seq Line : U  
 Location : Vial 78  
 Inj. No. : 0  
 Inj. Vol. : 5 µl

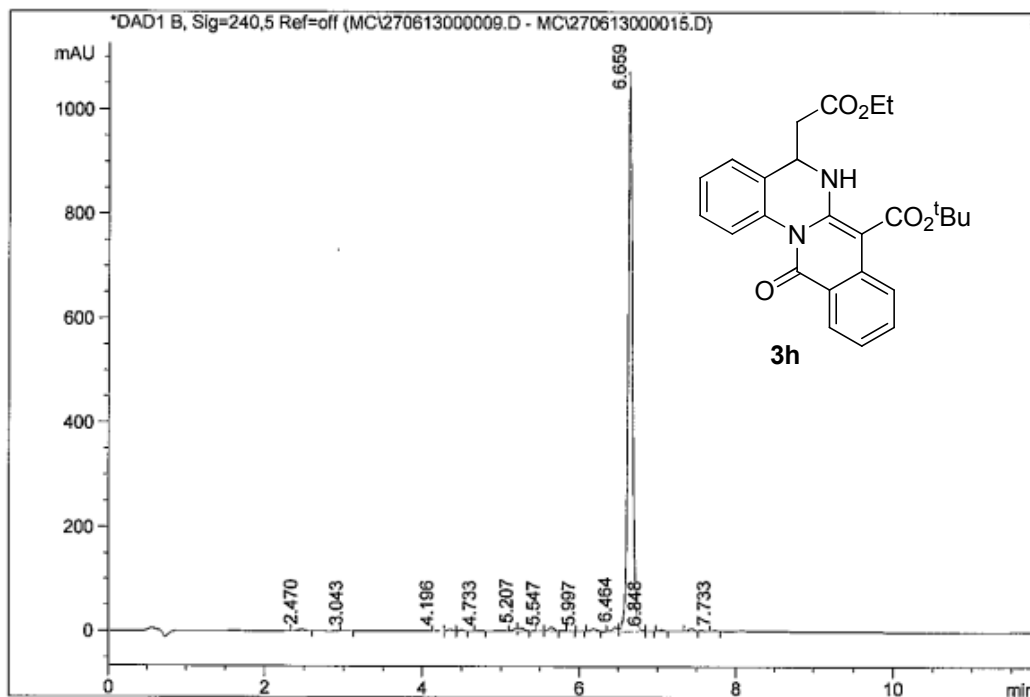

Signal 1: DAD1 B, Sig=240,5 Ref=off

| Peak # | RT [min] | Area     | Area % |
|--------|----------|----------|--------|
| 1      | 2.470    | 16.971   | 0.365  |
| 2      | 3.043    | 4.057    | 0.087  |
| 3      | 4.196    | 3.275    | 0.070  |
| 4      | 4.356    | 13.019   | 0.280  |
| 5      | 4.499    | 6.373    | 0.137  |
| 6      | 4.733    | 3.187    | 0.069  |
| 7      | 5.207    | 14.768   | 0.318  |
| 8      | 5.258    | 33.975   | 0.731  |
| 9      | 5.547    | 2.370    | 0.051  |
| 10     | 5.648    | 34.821   | 0.749  |
| 11     | 5.893    | 1.756    | 0.038  |
| 12     | 5.997    | 1.104    | 0.024  |
| 13     | 6.181    | 22.445   | 0.483  |
| 14     | 6.464    | 34.563   | 0.743  |
| 15     | 6.659    | 4424.765 | 95.141 |
| 16     | 6.848    | 3.166    | 0.068  |
| 17     | 7.056    | 7.778    | 0.167  |
| 18     | 7.434    | 20.720   | 0.446  |
| 19     | 7.733    | 1.656    | 0.036  |



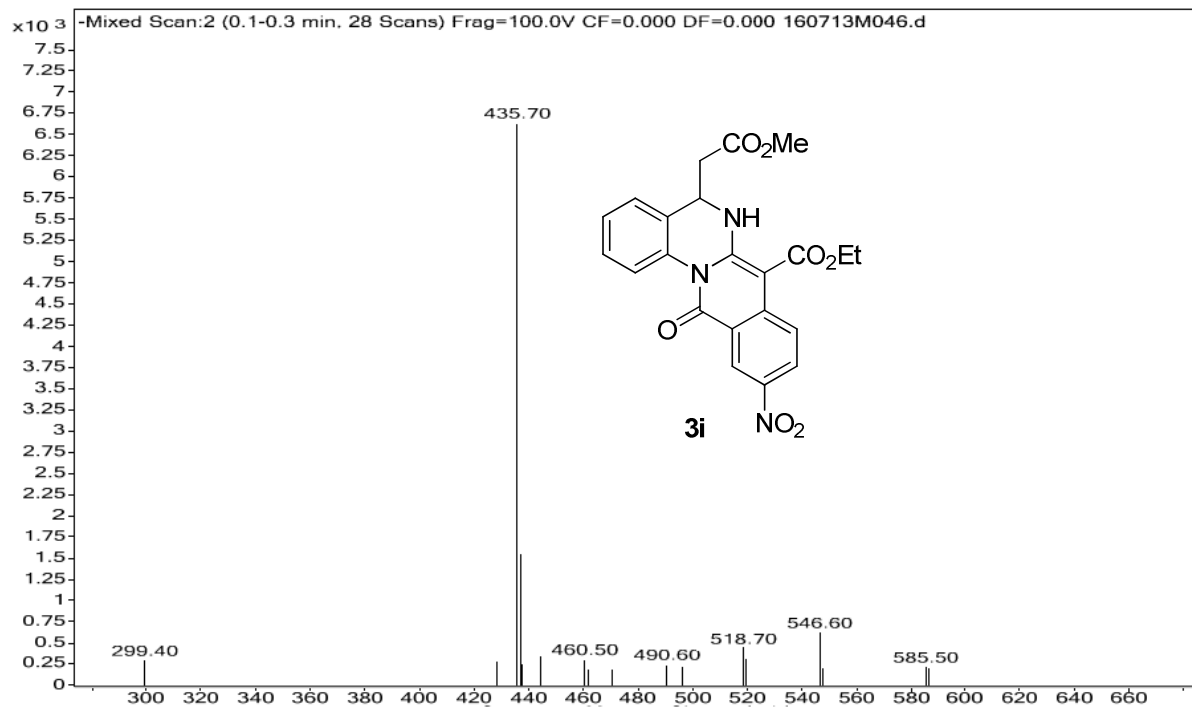

Injection Date : Tue, 16. Jul. 2013  
 Sample Name : ILS/ARJ/4/43  
 Acq Operator : RADHA  
 Acq. Method : D:\chem32\1\DATA\160713-MC 2013-07-16 18-19-54\C-18 ->  
 Analysis Method : D:\CHEM32\_002\1\METHODS\C-18 A50B50-GM.M  
 Method Info : Column : Symmetry C-18 75\*4.6mm,3.5µm  
 Mobile phase: A) 0.1% HCOOH in Water , B) ACN (gradient )  
 T/B%:0/50,1.0/50,6/98,10/98,10.5/50,12/50  
 Flow: 1.0 ml/min, Diluent: ACN:Water(90:10)

Seq Line : 3  
 Location : Vial 13  
 Inj. No. : 1  
 Inj. Vol. : 5 µl

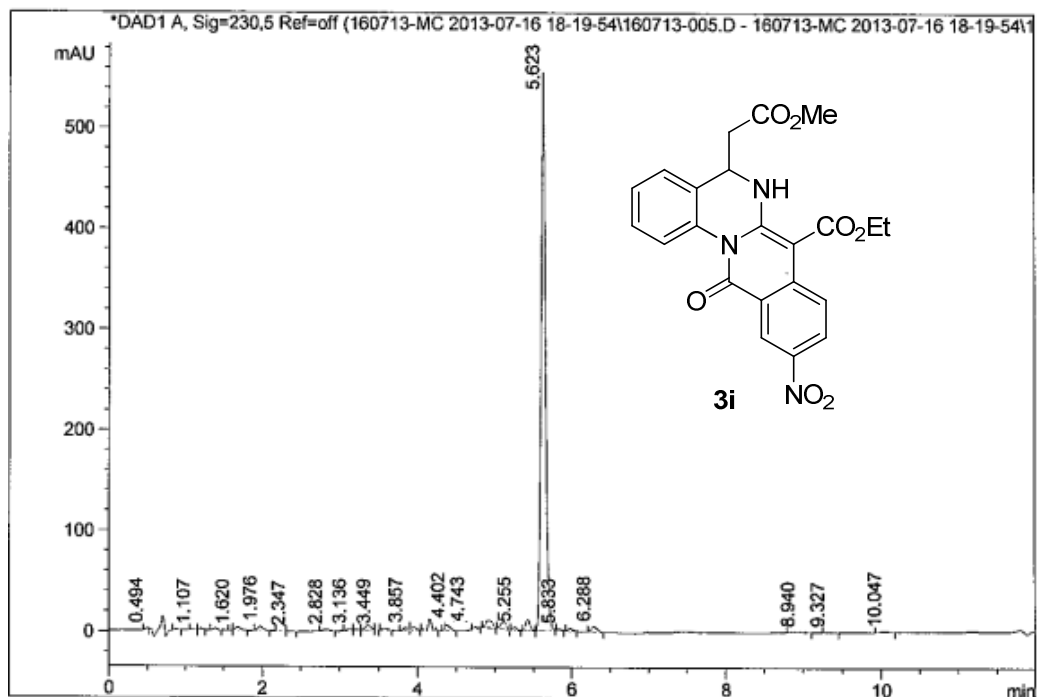

| Peak # | RT [min] | Area     | Area % |
|--------|----------|----------|--------|
| 13     | 3.209    | 4.119    | 0.149  |
| 14     | 3.368    | 23.600   | 0.855  |
| 15     | 3.449    | 1.043    | 0.038  |
| 16     | 3.580    | 8.845    | 0.320  |
| 17     | 3.857    | 14.548   | 0.527  |
| 18     | 3.945    | 13.224   | 0.479  |
| 19     | 4.156    | 1.028    | 0.041  |
| 20     | 4.402    | 1.388    | 0.224  |
| 21     | 4.743    | 7.435    | 0.269  |
| 22     | 4.927    | 41.131   | 1.490  |
| 23     | 5.113    | 35.347   | 1.281  |
| 24     | 5.255    | 12.500   | 0.453  |
| 25     | 5.425    | 44.642   | 1.617  |
| 26     | 5.623    | 2882.300 | 91.088 |
| 27     | 5.833    | 3.897    | 0.141  |

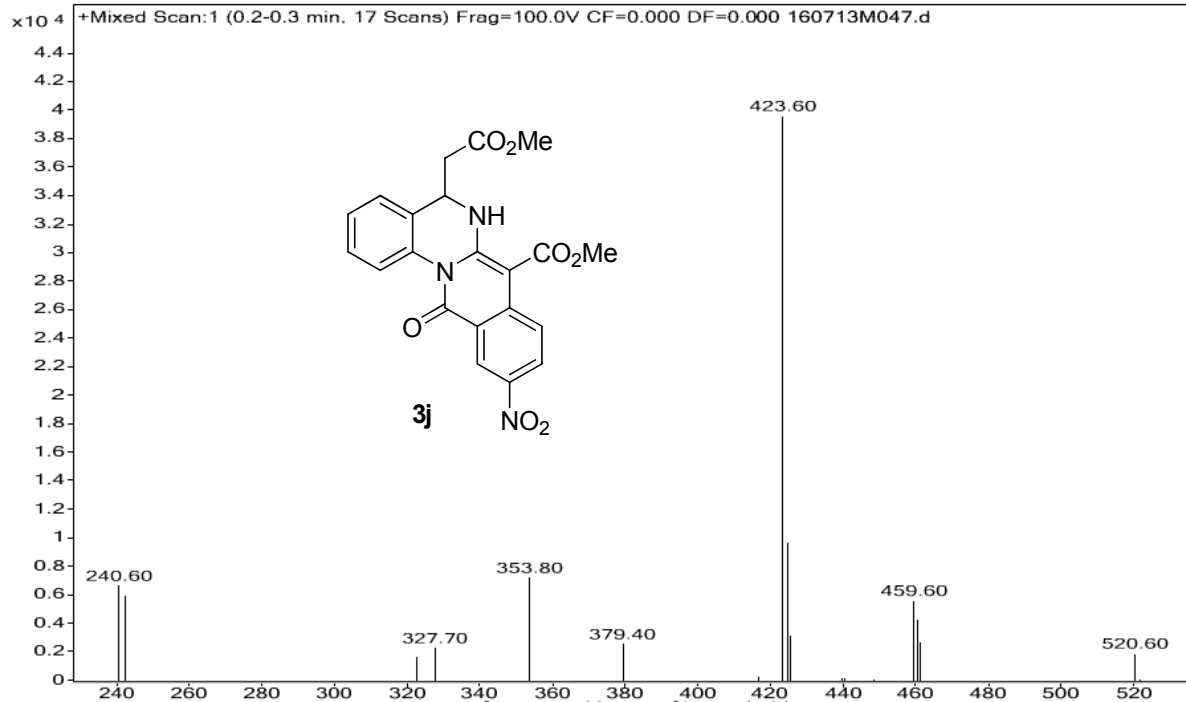

Injection Date : Tue, 6. Aug. 2013  
 Sample Name : ILS-ARJ-4-44  
 Acq Operator : RADHA  
 Acq. Method : D:\chem32\1\DATA\060813-MC 2013-08-06 19-05-44\C-18 ->  
 Analysis Method : D:\CHEM32\_002\1\METHODS\C-18 A80B20GM.M  
 Method Info : Column:Symmetry C-18 75\*4.6mm,3.5µ  
 Mobile phase: A) 0.1% HCOOH in Water , B) ACN (gradient )  
 T/B%:0/50,1.0/50,6/98,10/98,10.5/50,12/50  
 Flow: 1.0 ml/min, Diluent: ACN:Water(90:10)

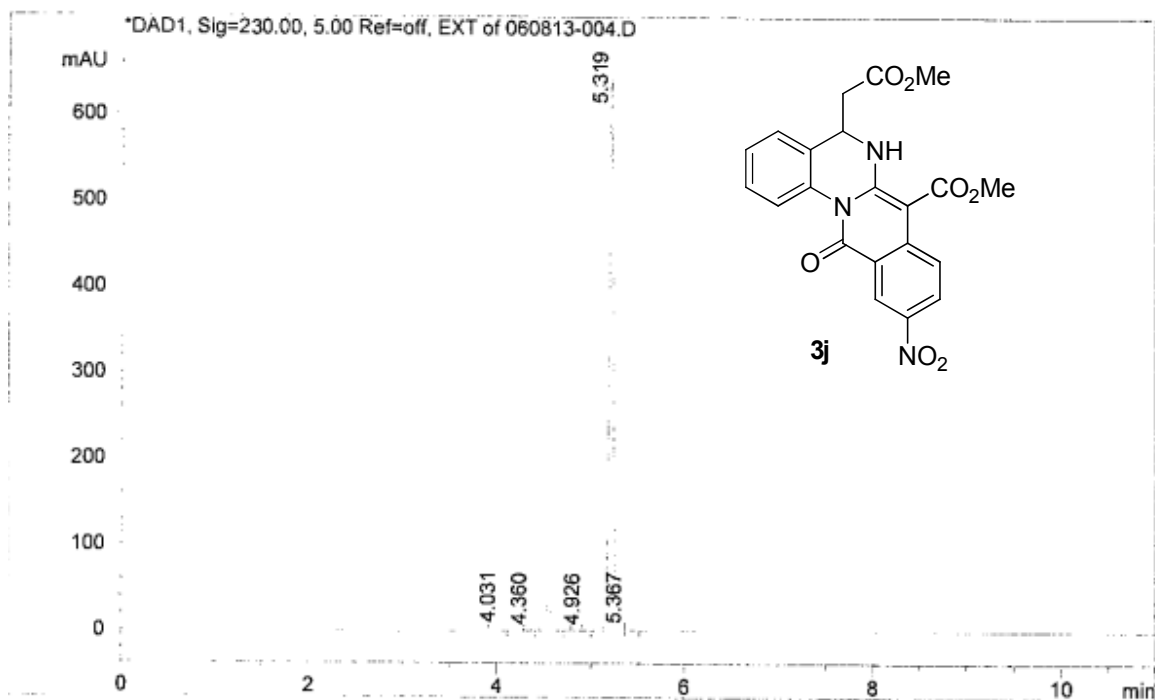

Signal 1: DAD1, Sig=230.00, 5.00 Ref=off, EXT

| Peak # | RT [min] | Area     | Area % |
|--------|----------|----------|--------|
| 1      | 4.031    | 11.022   | 0.506  |
| 2      | 4.360    | 1.731    | 0.079  |
| 3      | 4.549    | 118.613  | 5.443  |
| 4      | 4.857    | 3.466    | 0.159  |
| 5      | 4.926    | 1.401    | 0.064  |
| 6      | 5.319    | 2031.530 | 92.556 |
| 7      | 5.367    | 6.365    | 0.292  |

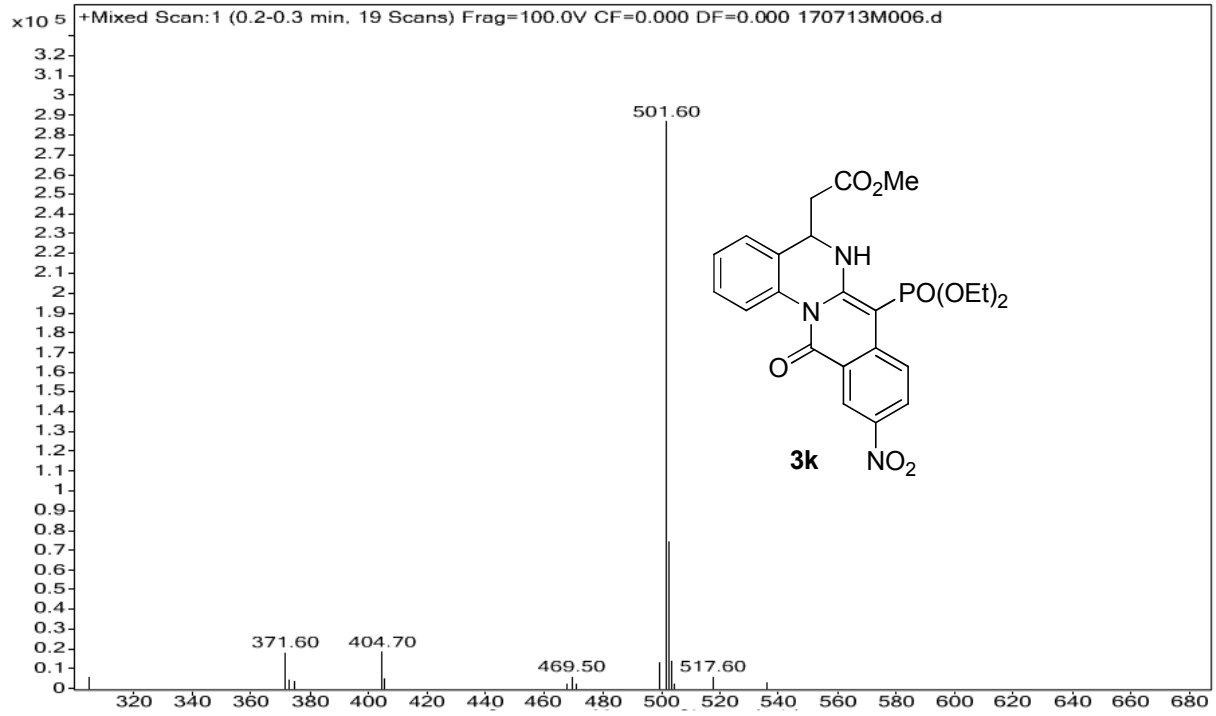

Injection Date : Tue, 16. Jul. 2013  
 Sample Name : ILS/ARJ/4/45  
 Acq Operator : RADHA  
 Acq. Method : D:\chem32\1\DATA\160713-MC 2013-07-16 18-19-54\C-18 ->  
 Analysis Method : D:\CHEM32\_002\1\METHODS\C-18 A50B50-GM.M  
 Method Info : Column : Symmetry C-18 75\*4.6mm, 3.5µm  
 Mobile phase: A) 0.1% HCOOH in Water , B) ACN (gradient )  
 T/B%:0/50,1.0/50,6/98,10/98,10.5/50,12/50  
 Flow: 1.0 ml/min, Diluent: ACN:Water(90:10)

Seq Line : 1  
 Location : Vial 11  
 Inj. No. : 1  
 Inj. Vol. : 5 µl

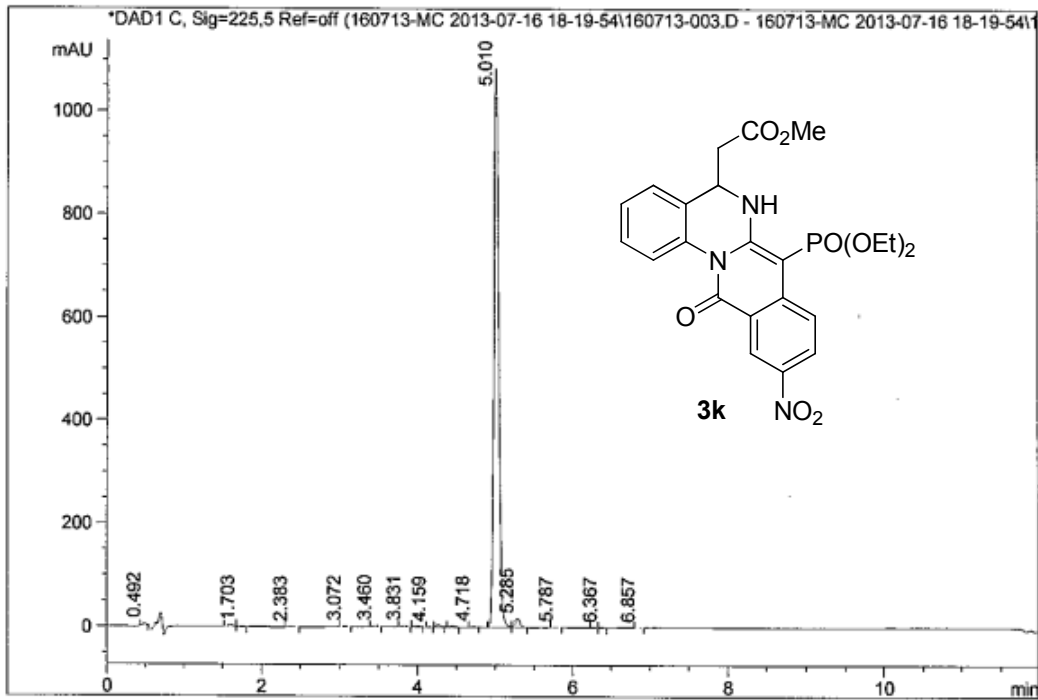

Signal 1: DAD1 C, Sig=225,5 Ref=off

| Peak # | RT [min] | Area     | Area % |
|--------|----------|----------|--------|
| 1      | 0.492    | 11.970   | 0.252  |
| 2      | 1.614    | 22.243   | 0.467  |
| 3      | 1.703    | 5.752    | 0.121  |
| 4      | 2.383    | 7.253    | 0.152  |
| 5      | 3.072    | 6.794    | 0.143  |
| 6      | 3.460    | 10.572   | 0.222  |
| 7      | 3.831    | 12.237   | 0.257  |
| 8      | 3.984    | 12.611   | 0.265  |
| 9      | 4.159    | 1.007    | 0.021  |
| 10     | 4.271    | 14.241   | 0.299  |
| 11     | 4.447    | 11.212   | 0.236  |
| 12     | 4.718    | 4.969    | 0.104  |
| 13     | 5.010    | 4556.962 | 95.763 |
| 14     | 5.285    | 67.903   | 1.427  |
| 15     | 5.787    | 3.140    | 0.066  |
| 16     | 6.287    | 4.482    | 0.094  |
| 17     | 6.367    | 3.921    | 0.082  |
| 18     | 6.857    | 1.314    | 0.028  |

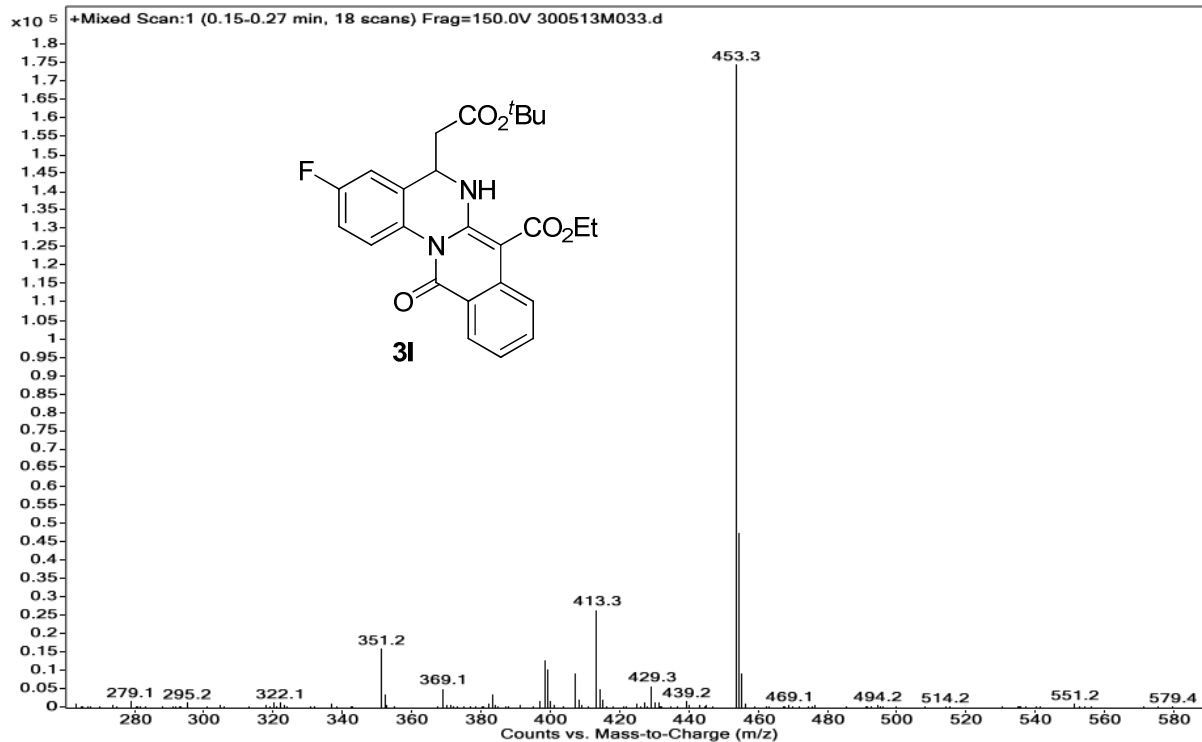

Injection Date : Tue, 16. Jul. 2013  
 Sample Name : ILS/ARJ/4/16  
 Acq Operator : RADHA  
 Acq. Method : D:\chem32\1\DATA\160713-MC 2013-07-16 18-19-54\C-18 ->  
 Analysis Method : D:\CHEM32\_002\1\METHODS\C-18 A50B50-GM.M  
 Method Info : Column : Symmetry C-18 75\*4.6mm,3.5µm  
 Mobile phase: A) 0.1% HCOOH in Water , B) ACN (gradient )  
 T/B%:0/50,1.0/50,6/98,10/98,10.5/50,12/50  
 Flow: 1.0 ml/min, Diluent: ACN:Water(90:10)

Seq Line : 5  
 Location : Vial 15  
 Inj. No. : 1  
 Inj. Vol. : 5 µl

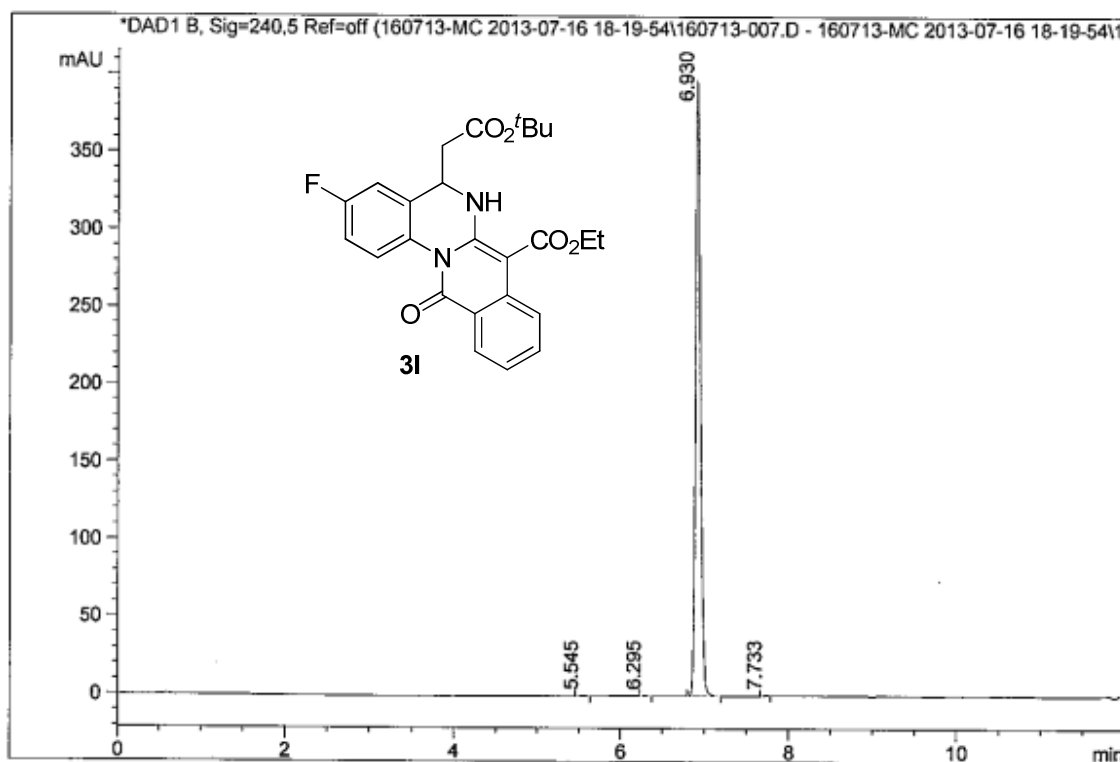

Signal 1: DAD1 B, Sig=240,5 Ref=off

| Peak # | RT [min] | Area     | Area % |
|--------|----------|----------|--------|
| 1      | 5.545    | 1.040    | 0.064  |
| 2      | 6.295    | 1.132    | 0.069  |
| 3      | 6.930    | 1630.914 | 99.770 |
| 4      | 7.733    | 1.589    | 0.097  |



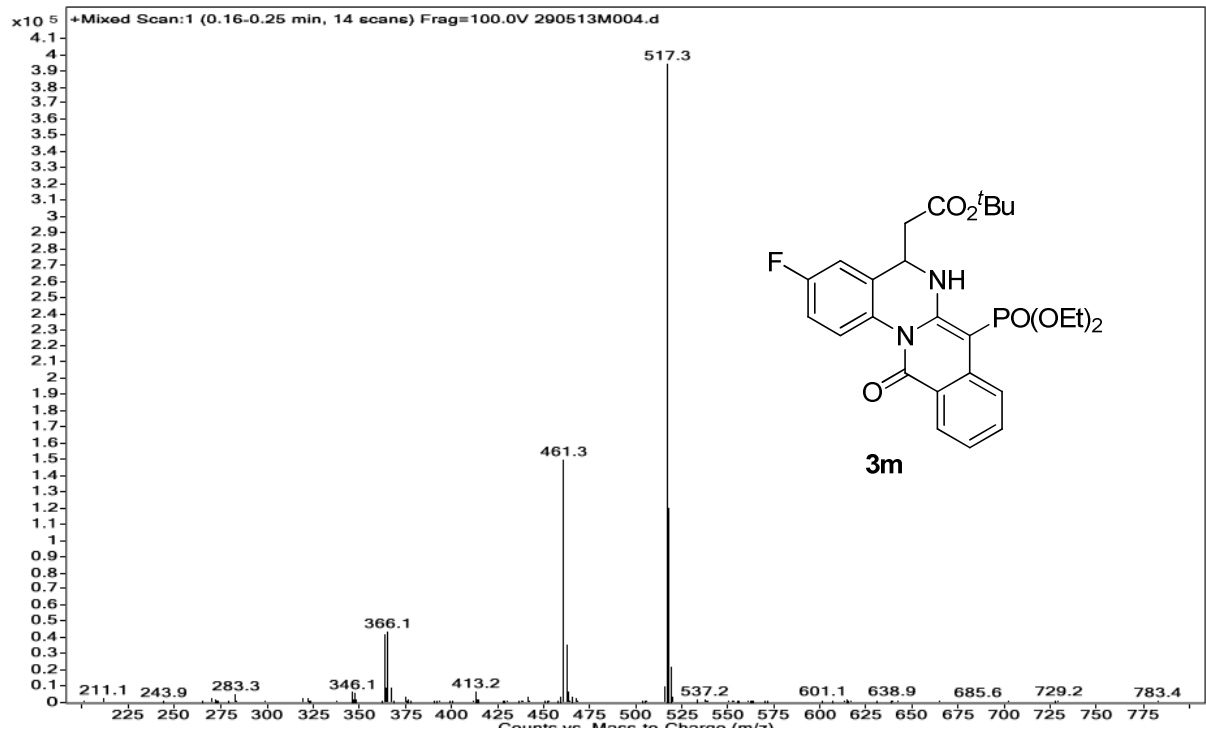

Injection Date : Tue, 16. Jul. 2013  
 Sample Name : ILS/ARJ/4/18  
 Acq Operator : RADHA  
 Acq. Method : D:\chem32\1\DATA\160713-MC 2013-07-16 18-19-54\C-18 ->  
 Analysis Method : D:\CHEM32\_002\1\METHODS\C-18 A50B50-GM.M  
 Method Info : Column : Symmetry C-18 75\*4.6mm,3.5µm  
 Mobile phase: A) 0.1% HCOOH in Water , B) ACN (gradient )  
 T/B%:0/50,1.0/50,6/98,10/98,10.5/50,12/50  
 Flow: 1.0 ml/min, Diluent: ACN:Water(90:10)

Seq Line : 4  
 Location : Vial 14  
 Inj. No. : 1  
 Inj. Vol. : 5 µl

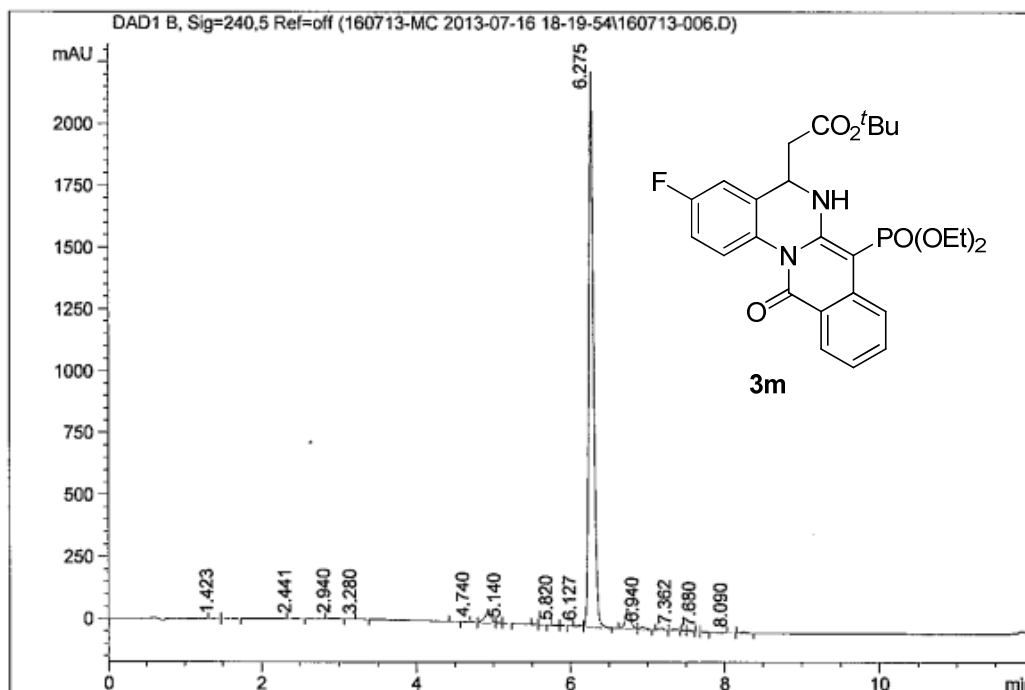

| Peak # | RT [min] | Area     | Area % |
|--------|----------|----------|--------|
| 13     | 5.820    | 6.354    | 0.060  |
| 14     | 5.887    | 4.516    | 0.043  |
| 15     | 6.127    | 23.385   | 0.222  |
| 16     | 6.275    | 9607.283 | 91.362 |
| 17     | 6.743    | 380.643  | 3.620  |
| 18     | 6.940    | 43.738   | 0.416  |
| 19     | 7.175    | 31.651   | 0.301  |
| 20     | 7.362    | 19.652   | 0.187  |
| 21     | 7.507    | 6.521    | 0.062  |
| 22     | 7.547    | 13.996   | 0.133  |
| 23     | 7.680    | 4.052    | 0.039  |
| 24     | 7.720    | 10.894   | 0.104  |
| 25     | 8.090    | 3.441    | 0.033  |
| 26     | 8.260    | 18.284   | 0.174  |

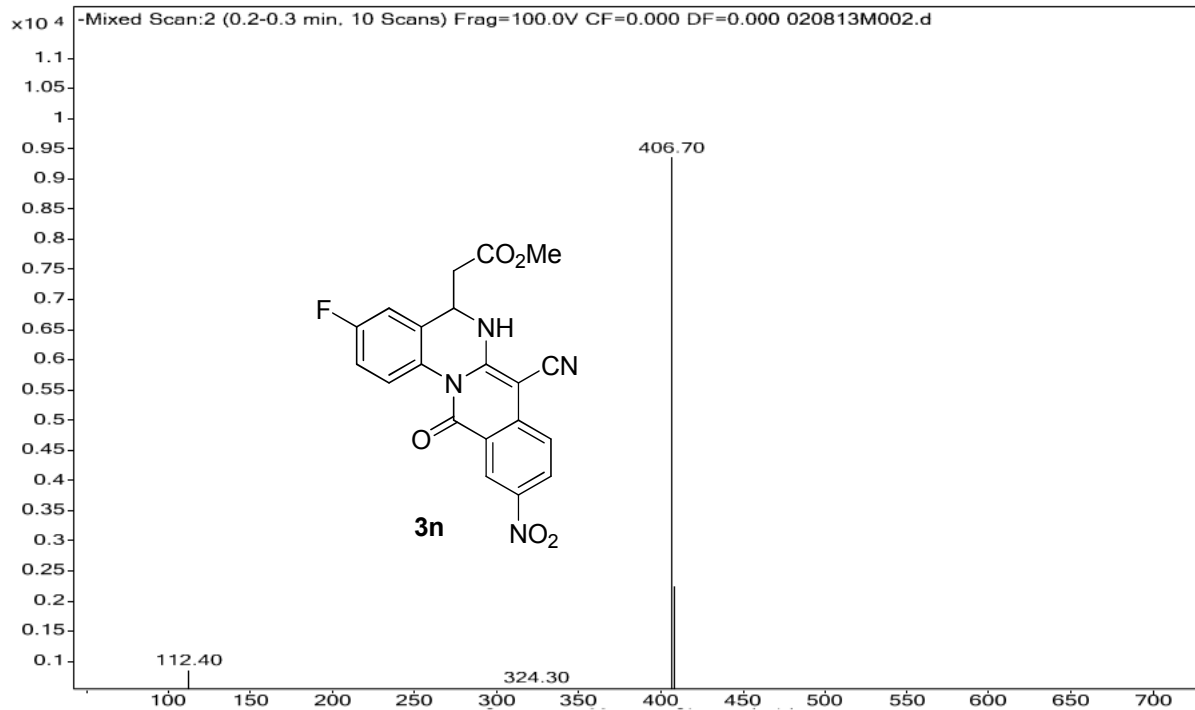

```

-----
Injection Date : Mon, 19. Aug. 2013          Seq Line   :           9
Sample Name    : ILS-ARJ-4-73                Location    :       Vial 17
Acq Operator   : RADHA                       Inj. No.   :           1
Acq. Method   : D:\chem32\1\DATA\190813-MC 2013-08-19 18-57-30\C-18 ->
Analysis Method : D:\CHEM32_002\1\METHODS\C-18 A50B50-GM.M
Method Info    : Column : Symmetry C-18 75*4.6mm,3.5µm
                  Mobile phase: A) 0.1% HCOOH in Water , B) ACN
                  T/B%:0/50,1/50,4/98,10/98,10.5/50,12/50
                  Flow: 1.0 ml/min, Diluent: ACN:Water(90:10)

```

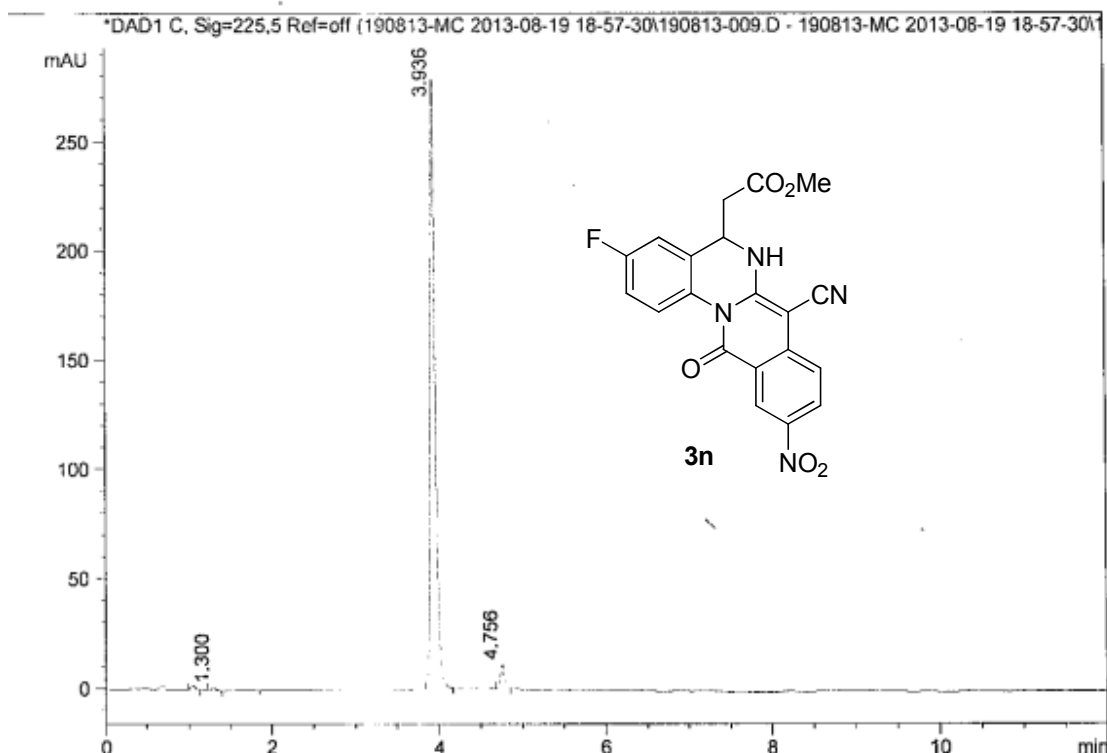

Signal 1: DAD1 C, Sig=225,5 Ref=off

| Peak # | RT [min] | Area     | Area % |
|--------|----------|----------|--------|
| 1      | 1.051    | 5.667    | 0.477  |
| 2      | 1.300    | 3.038    | 0.256  |
| 3      | 3.936    | 1138.593 | 95.852 |
| 4      | 4.756    | 40.568   | 3.415  |

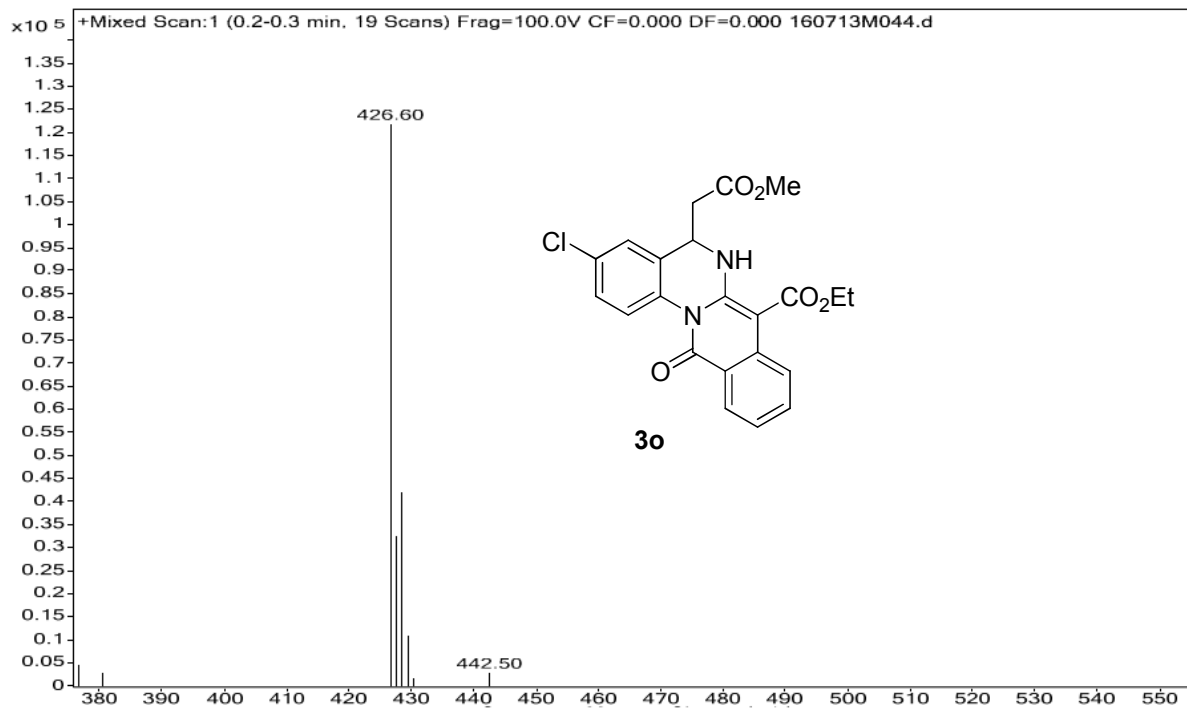

Injection Date : Tue, 16. Jul. 2013  
 Sample Name : ILS/ARJ/4/37  
 Acq Operator : RADHA  
 Acq. Method : D:\chem32\1\DATA\160713-MC 2013-07-16 18-19-54\C-18 ->  
 Analysis Method : D:\CHEM32\_002\1\METHODS\C-18 A50B50-GM.M  
 Method Info : Column : Symmetry C-18 75\*4.6mm,3.5µm  
 Mobile phase: A) 0.1% HCOOH in Water , B) ACN (gradient )  
 T/B%:0/50,1.0/50,6/98,10/98,10.5/50,12/50  
 Flow: 1.0 ml/min, Diluent: ACN:Water(90:10)

Seq Line : 0  
 Location : Vial 18  
 Inj. No. : 1  
 Inj. Vol. : 5 µl

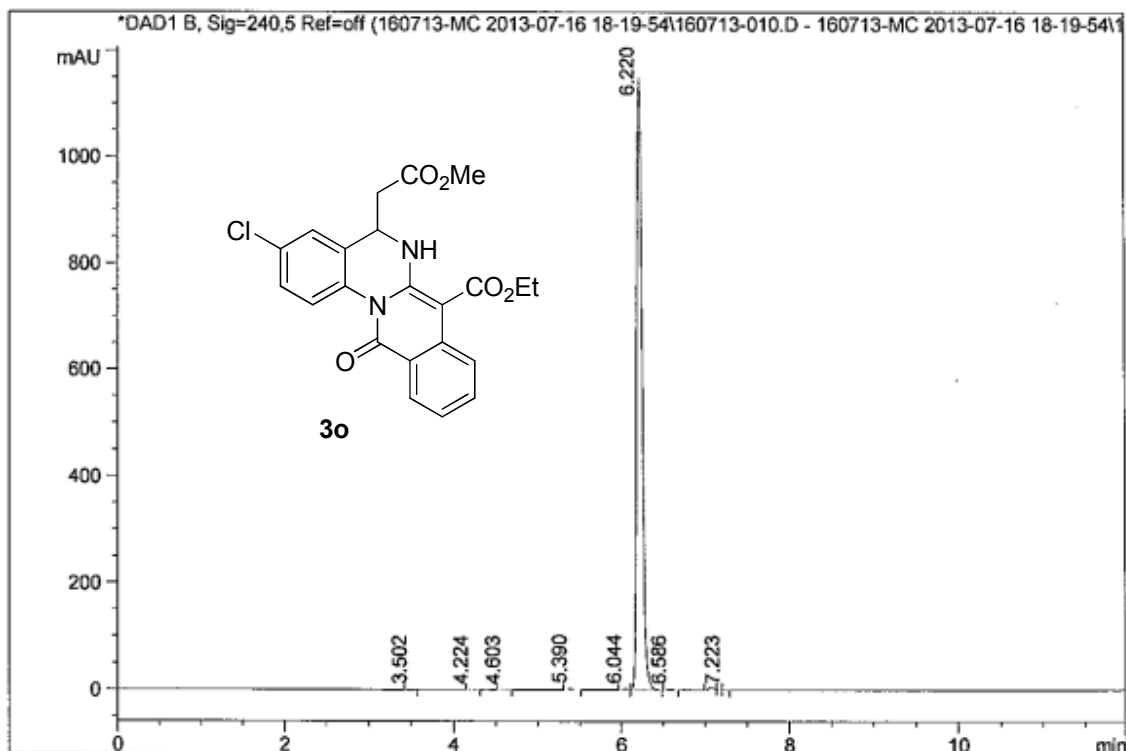

Signal 1: DAD1 B, Sig=240,5 Ref=off

| Peak # | RT [min] | Area     | Area % |
|--------|----------|----------|--------|
| 1      | 3.502    | 1.078    | 0.021  |
| 2      | 4.224    | 2.591    | 0.051  |
| 3      | 4.603    | 1.383    | 0.027  |
| 4      | 5.390    | 12.563   | 0.247  |
| 5      | 6.044    | 7.763    | 0.153  |
| 6      | 6.220    | 5029.748 | 98.871 |
| 7      | 6.586    | 2.149    | 0.042  |
| 8      | 7.077    | 24.232   | 0.476  |
| 9      | 7.143    | 3.231    | 0.064  |
| 10     | 7.223    | 2.444    | 0.048  |

RP

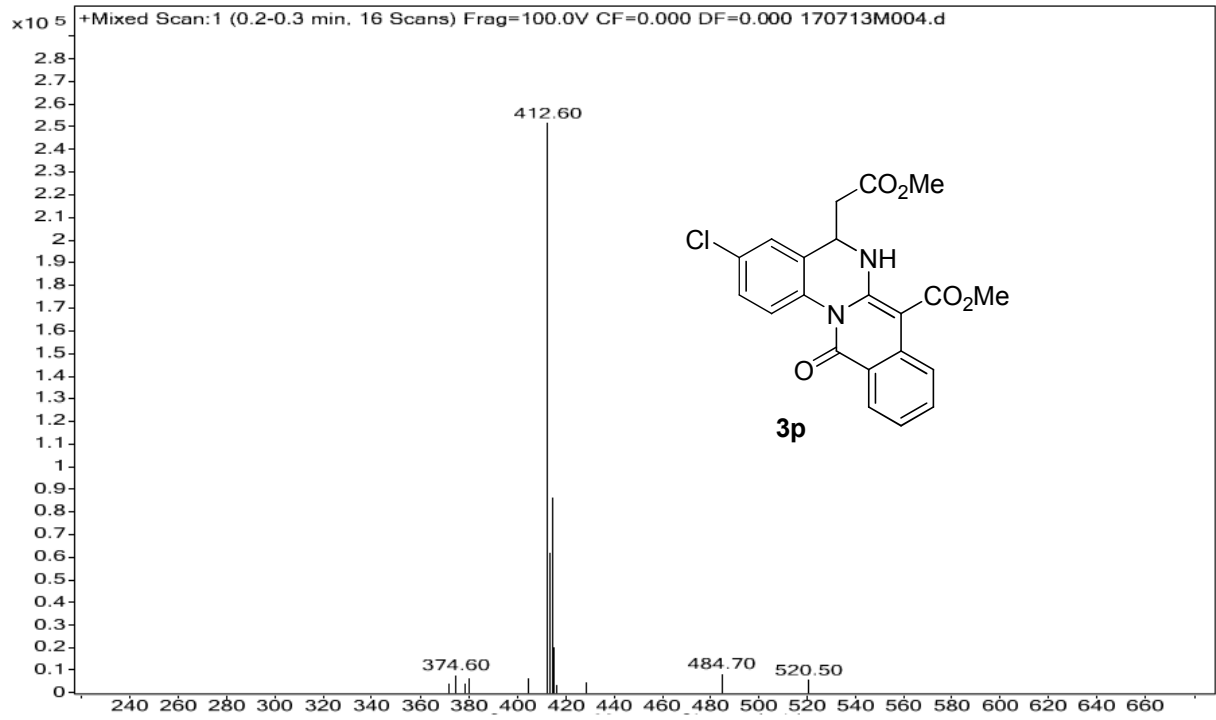

Injection Date : Thu, 30. May. 2013  
 Sample Name : ILS-ARJ-4-6  
 Acq Operator : RADHA  
 Acq. Method : D:\chem32\1\DATA\300513-MC 2013-05-30 17-45-03\C-18 ->  
 Analysis Method : D:\CHEM32\_002\1\METHODS\C-18 A80B20GM.M  
 Method Info : Column:Symmetry C-18 75\*4.6mm,3.5µ  
 Mobile phase: A) 0.1% HCOOH in Water , B) ACN (gradient  
 T/B%:0/50,0.5/50,6/98,10/98,10.5/50,12/50  
 Flow: 1.0 ml/min, Diluent: ACN:Water(90:10)

Seq Line : .6  
 Location : Vial 51  
 Inj. No. : 1  
 Inj. Vol. : 5 µl

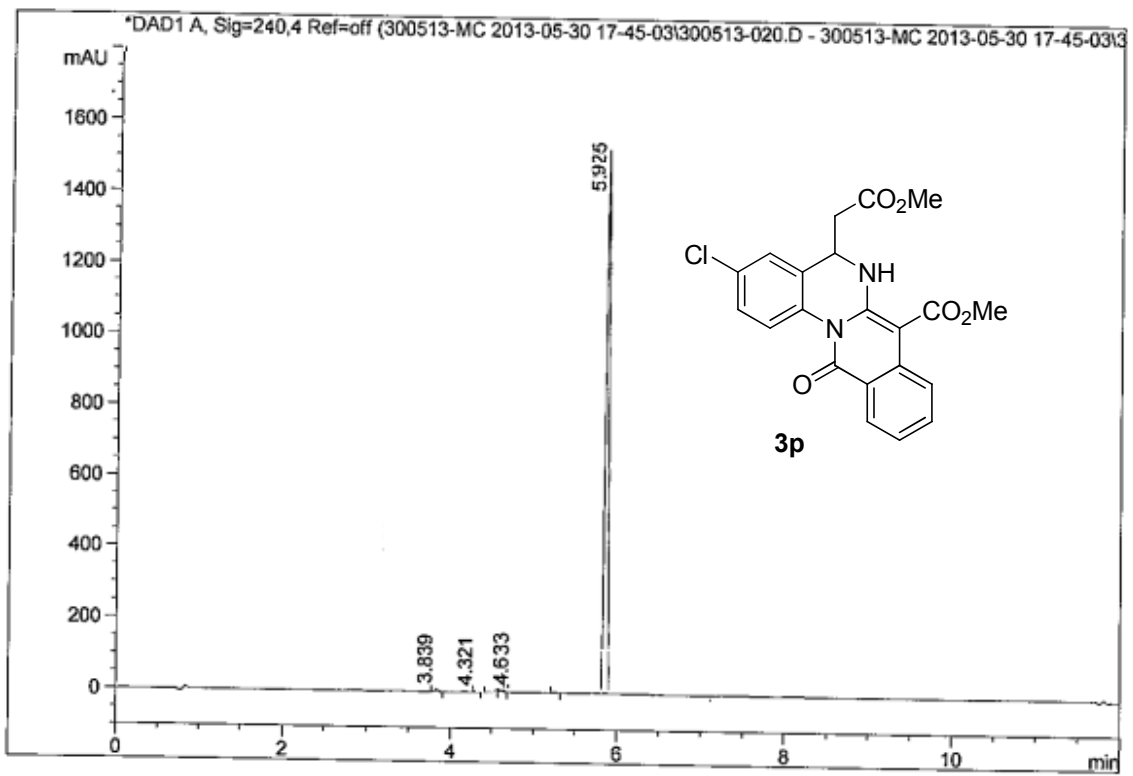

Signal 1: DAD1 A, Sig=240,4 Ref=off

| Peak # | RT [min] | Area     | Area % |
|--------|----------|----------|--------|
| 1      | 3.839    | 118.568  | 2.143  |
| 2      | 4.321    | 5.921    | 1.309  |
| 3      | 4.444    | 8.855    | 0.164  |
| 4      | 4.633    | 11.573   | 0.214  |
| 5      | 5.925    | 5366.832 | 95.870 |



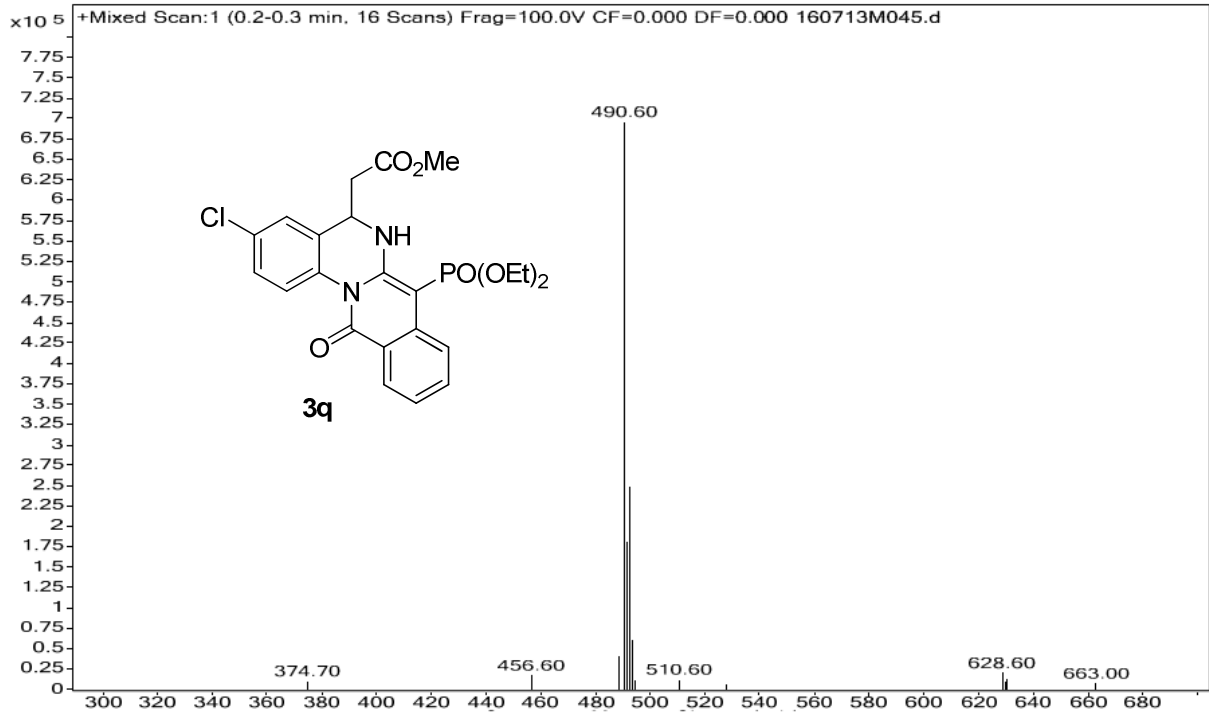

Injection Date : Tue, 16. Jul. 2013  
 Sample Name : ILS/ARJ/4/39  
 Acq Operator : RADHA  
 Acq. Method : D:\chem32\1\DATA\160713-MC 2013-07-16 18-19-54\C-18 ->  
 Analysis Method : D:\CHEM32\_002\1\METHODS\C-18 A50B50-GM.M  
 Method Info : Column : Symmetry C-18 75\*4.6mm,3.5µm  
 Mobile phase: A) 0.1% HCOOH in Water , B) ACN (gradient )  
 T/B%:0/50,1.0/50,6/98,10/98,10.5/50,12/50  
 Flow: 1.0 ml/min, Diluent: ACN:Water(90:10)

Seq Line : 2  
 Location : Vial 12  
 Inj. No. : 1  
 Inj. Vol. : 5 µl

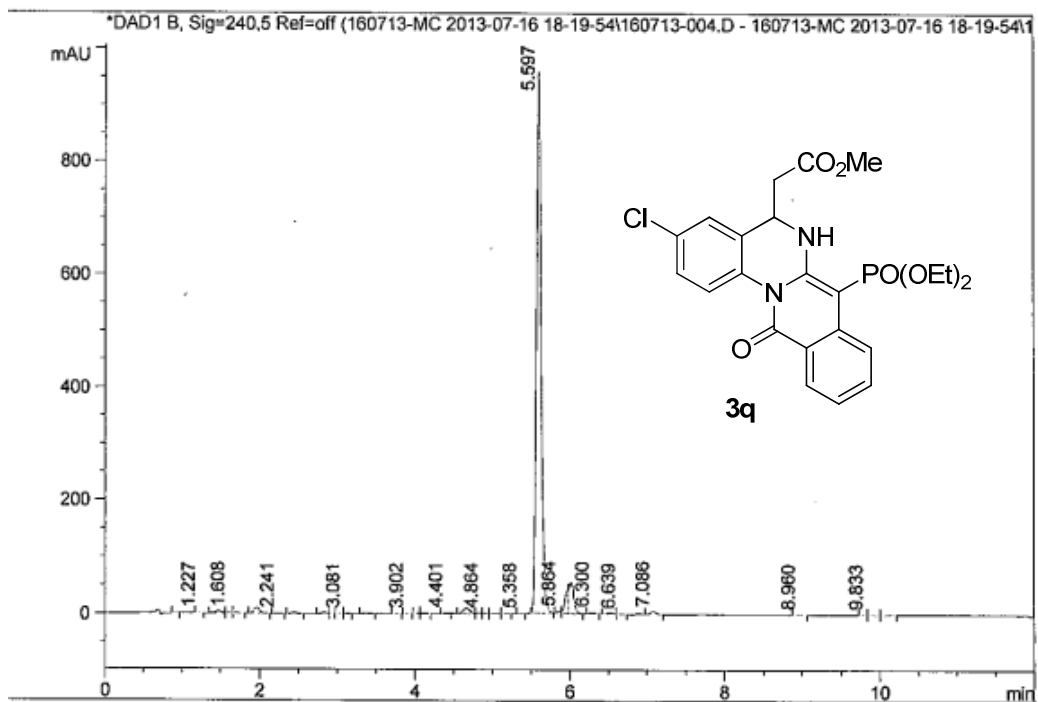

| Signal | 1: DAD1 B, Sig=240,5 Ref=off | Peak # | RT [min] | Area     | Area % |
|--------|------------------------------|--------|----------|----------|--------|
| 13     |                              | 13     | 3.377    | 8.237    | 0.174  |
| 14     |                              | 14     | 3.779    | 2.156    | 0.045  |
| 15     |                              | 15     | 3.902    | 1.258    | 0.027  |
| 16     |                              | 16     | 4.036    | 2.088    | 0.044  |
| 17     |                              | 17     | 4.120    | 4.401    | 0.093  |
| 18     |                              | 18     | 4.401    | 4.400    | 0.093  |
| 19     |                              | 19     | 4.665    | 55.220   | 1.163  |
| 20     |                              | 20     | 4.827    | 5.441    | 0.115  |
| 21     |                              | 21     | 4.864    | 2.085    | 0.044  |
| 22     |                              | 22     | 5.063    | 3.631    | 0.077  |
| 23     |                              | 23     | 5.172    | 3.070    | 0.065  |
| 24     |                              | 24     | 5.358    | 1.189    | 0.025  |
| 25     |                              | 25     | 5.597    | 4117.947 | 89.951 |
| 26     |                              | 26     | 5.864    | 8.727    | 0.184  |
| 27     |                              | 27     | 5.980    | 130.788  | 2.755  |

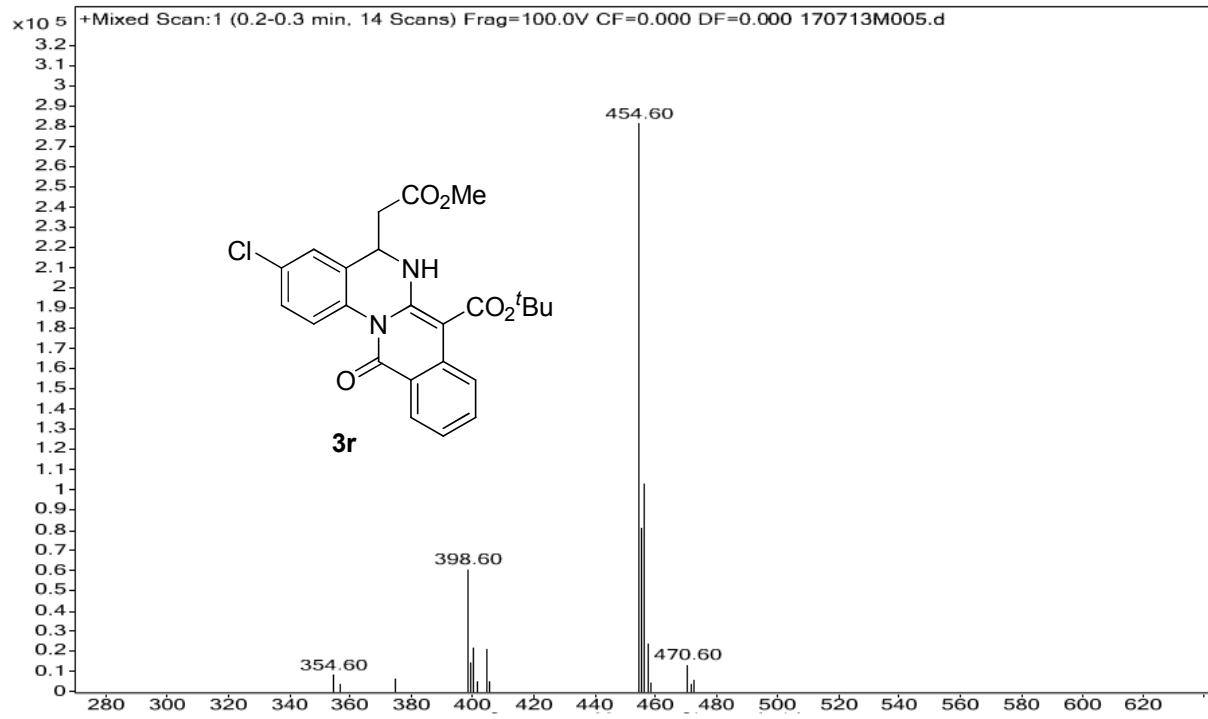

```

Injection Date : Tue, 16. Jul. 2013
Sample Name    : ILS/ARJ/4/40
Acq Operator   : RADHA
Acq. Method    : D:\chem32\1\DATA\160713-MC 2013-07-16 18-19-54\C-18 ->
Analysis Method : D:\CHEM32_002\1\METHODS\C-18 A50B50-GM.M
Method Info    : Column : Symmetry C-18 75*4.6mm,3.5µm
                  Mobile phase: A) 0.1% HCOOH in Water , B) ACN (gradient )
                  T/B%:0/50,1.0/50,6/98,10/98,10.5/50,12/50
                  Flow: 1.0 ml/min, Diluent: ACN:Water(90:10)
  
```

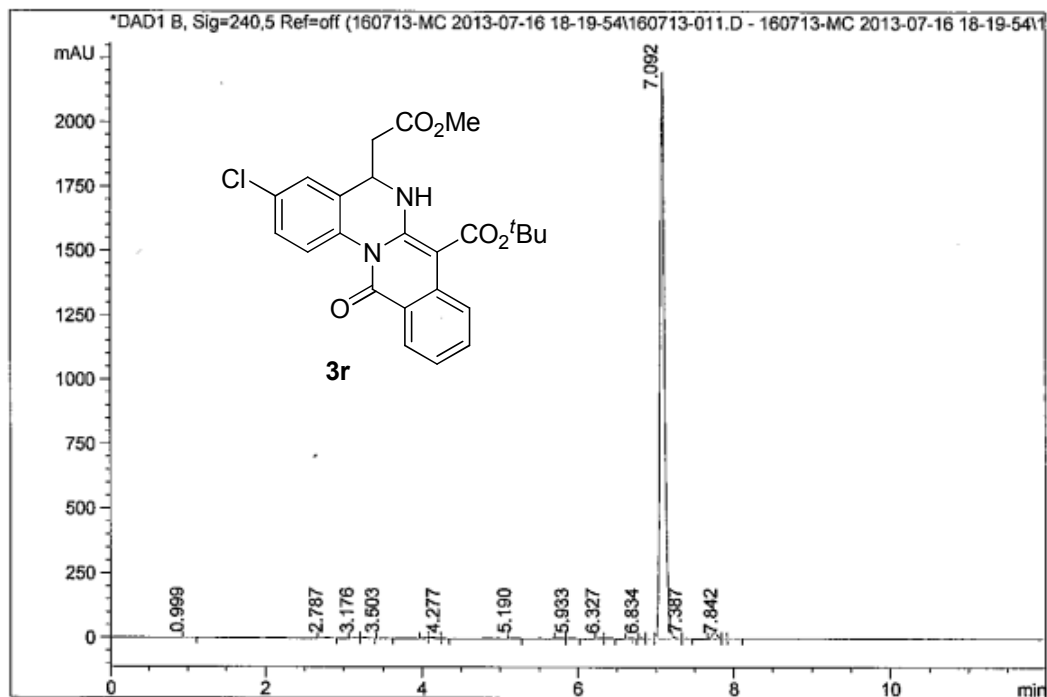

Signal 1: DAD1 B, Sig=240,5 Ref=off

| Peak # | RT [min] | Area   | Area % | Peak # | RT [min] | Area     | Area % |
|--------|----------|--------|--------|--------|----------|----------|--------|
| 1      | 0.999    | 4.217  | 0.045  | 13     | 6.379    | 7.588    | 0.081  |
| 2      | 2.787    | 2.577  | 0.027  | 14     | 6.675    | 4.540    | 0.048  |
| 3      | 3.176    | 8.288  | 0.088  | 15     | 6.834    | 2.324    | 0.025  |
| 4      | 3.263    | 15.795 | 0.169  | 16     | 6.917    | 3.071    | 0.033  |
| 5      | 3.503    | 4.801  | 0.051  | 17     | 7.092    | 9124.833 | 97.344 |
| 6      | 4.057    | 11.572 | 0.123  | 18     | 7.387    | 6.836    | 0.073  |
| 7      | 4.144    | 25.044 | 0.267  | 19     | 7.757    | 121.065  | 1.292  |
| 8      | 4.277    | 2.063  | 0.022  | 20     | 7.842    | 2.080    | 0.022  |
| 9      | 5.190    | 9.251  | 0.099  | 21     | 7.980    | 6.619    | 0.071  |
| 10     | 5.770    | 4.113  | 0.044  |        |          |          |        |
| 11     | 5.933    | 4.753  | 0.051  |        |          |          |        |
| 12     | 6.327    | 2.384  | 0.025  |        |          |          |        |

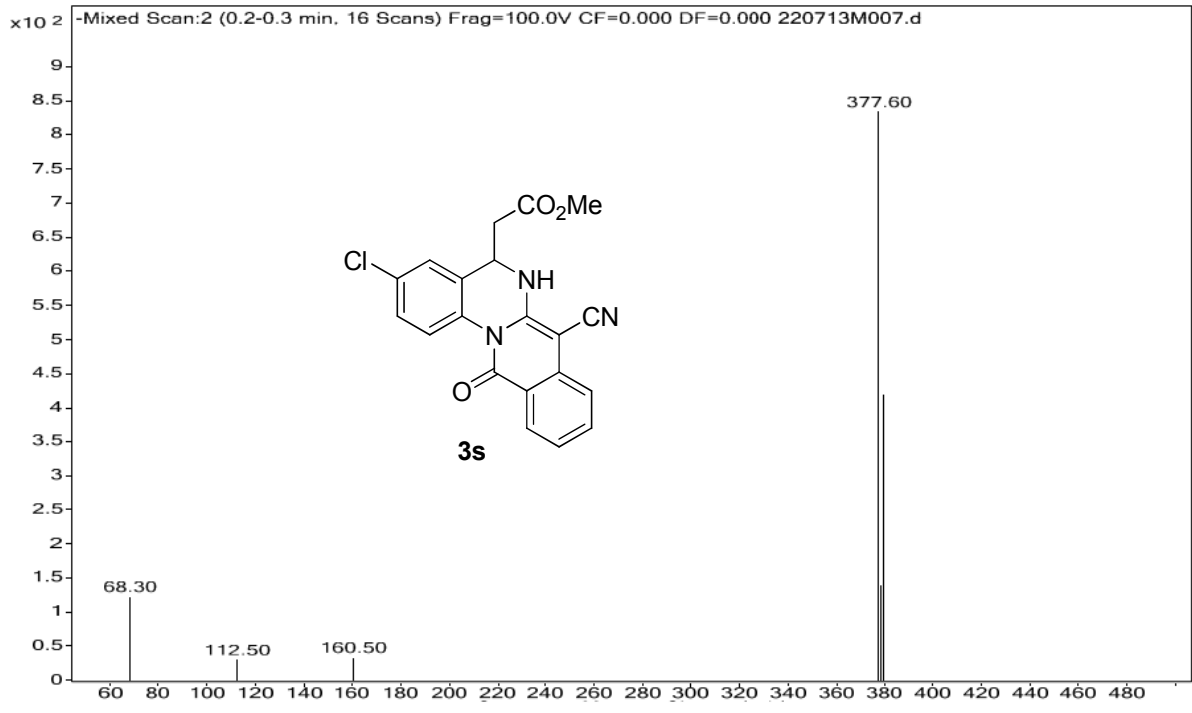

```

Injection Date : Mon, 19. Aug. 2013
Sample Name    : ILS-ARJ-4-60
Acq Operator   : RADHA
Acq. Method    : D:\chem32\1\DATA\190813-MC 2013-08-19 18-57-30\C-18 ->
Analysis Method : D:\CHEM32_002\1\METHODS\C-18 A50B50-GM.M
Method Info    : Column: X TERRA C18 250*4.6mm,5µm
                  Mobile phase: A) 0.1%TFA in water,B) ACN T/B%:0/20,3/20,15/
                  Flow:1.0 ml/min Diluent: ACN:Water(80:20)
Seq Line      : 4
Location      : Vial 12
Inj. No.     : 1
Inj. Vol.    : 5 µl

```

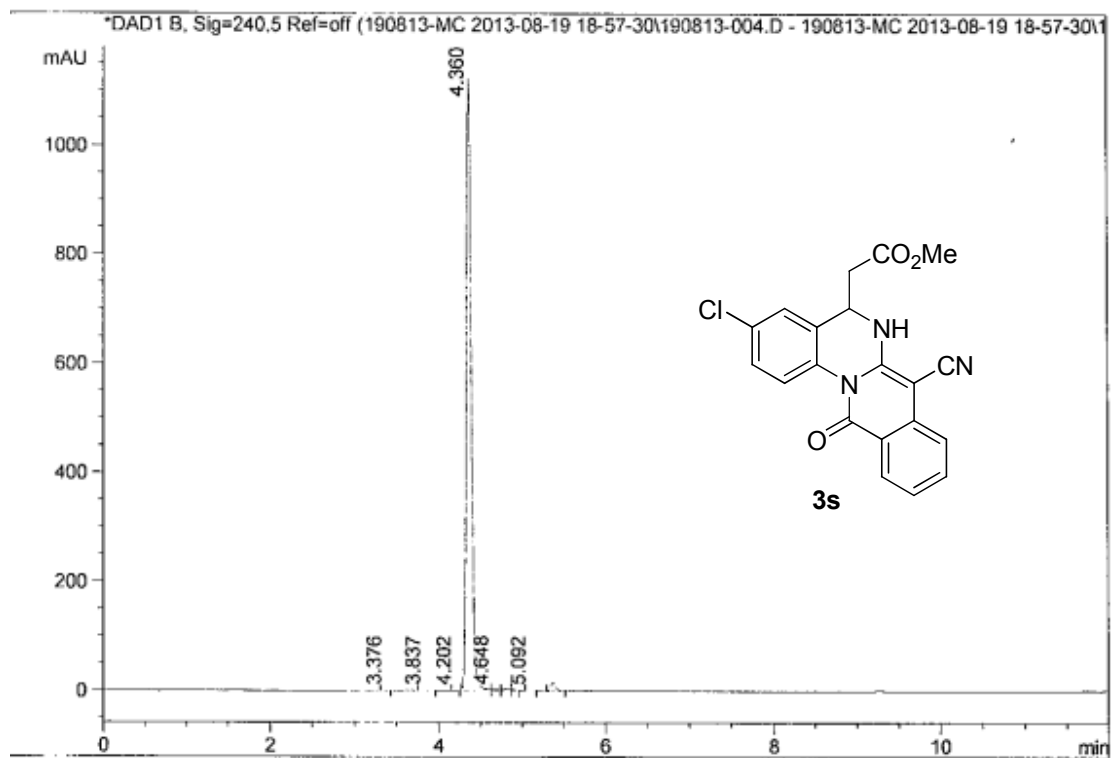

Signal 1: DAD1 B, Sig=240,5 Ref=off

| Peak # | RT [min] | Area     | Area % |
|--------|----------|----------|--------|
| 1      | 3.376    | 1.183    | 0.026  |
| 2      | 3.837    | 2.615    | 0.057  |
| 3      | 4.202    | 1.032    | 0.022  |
| 4      | 4.360    | 4526.196 | 98.298 |
| 5      | 4.648    | 4.946    | 0.107  |
| 6      | 4.807    | 10.607   | 0.230  |
| 7      | 4.870    | 2.008    | 0.044  |
| 8      | 5.092    | 2.860    | 0.062  |
| 9      | 5.370    | 53.141   | 1.154  |

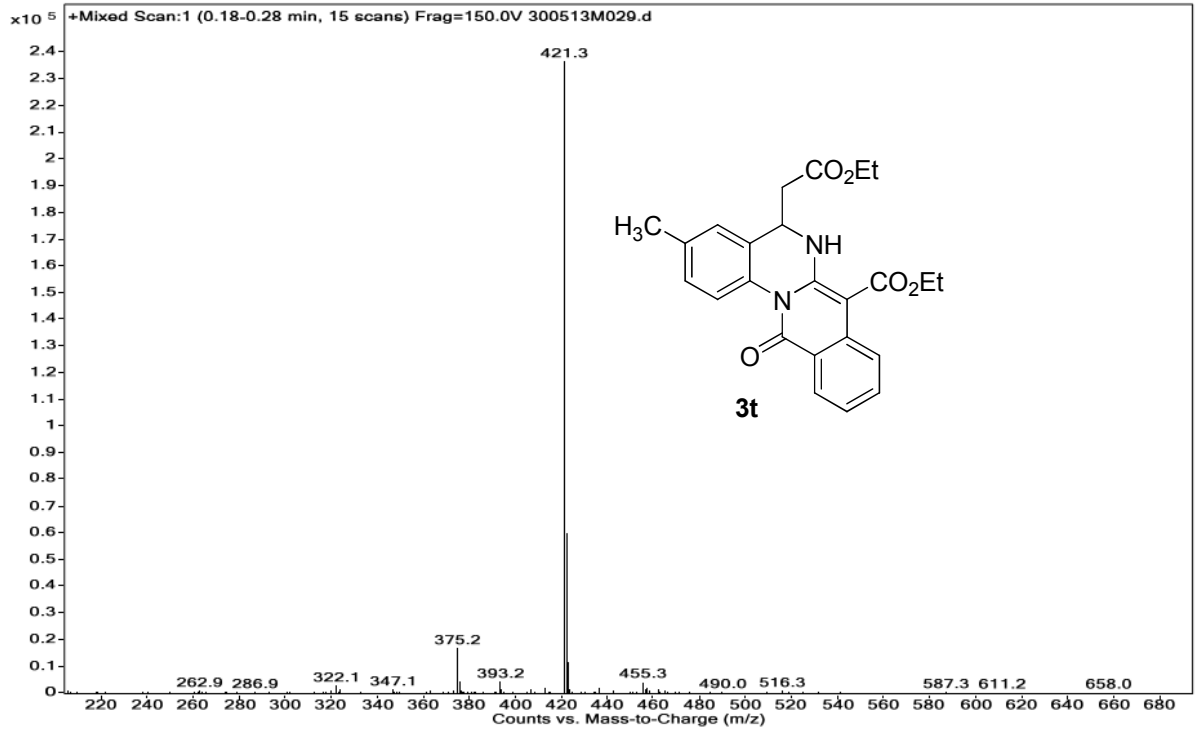

|                 |                                                                                        |           |           |
|-----------------|----------------------------------------------------------------------------------------|-----------|-----------|
| Injection Date  | : Tue, 18. Jun. 2013                                                                   | Seq Line  | : 10      |
| Sample Name     | : ILS-ARJ-4-1                                                                          | Location  | : Vial 16 |
| Acq Operator    | : RADHA                                                                                | Inj. No.  | : 1       |
| Acq. Method     | : D:\chem32\1\DATA\180613-MC 2013-06-18 18-44-29\C-18 ->                               | Inj. Vol. | : 5 µl    |
| Analysis Method | : D:\CHEM32_002\1\METHODS\C-18 A80B20GM.M                                              |           |           |
| Method Info     | : Column:Symmetry C-18 75*4.6mm,3.5µ                                                   |           |           |
|                 | : Mobile phase: A) 0.1% HCOOH in water,B) ACN T%B:0/20,0.5/20,4/98,10/98,10.5/20,12/20 |           |           |
|                 | : Flow:1.0 ml/min Diluent: ACN:Water(80:20)                                            |           |           |

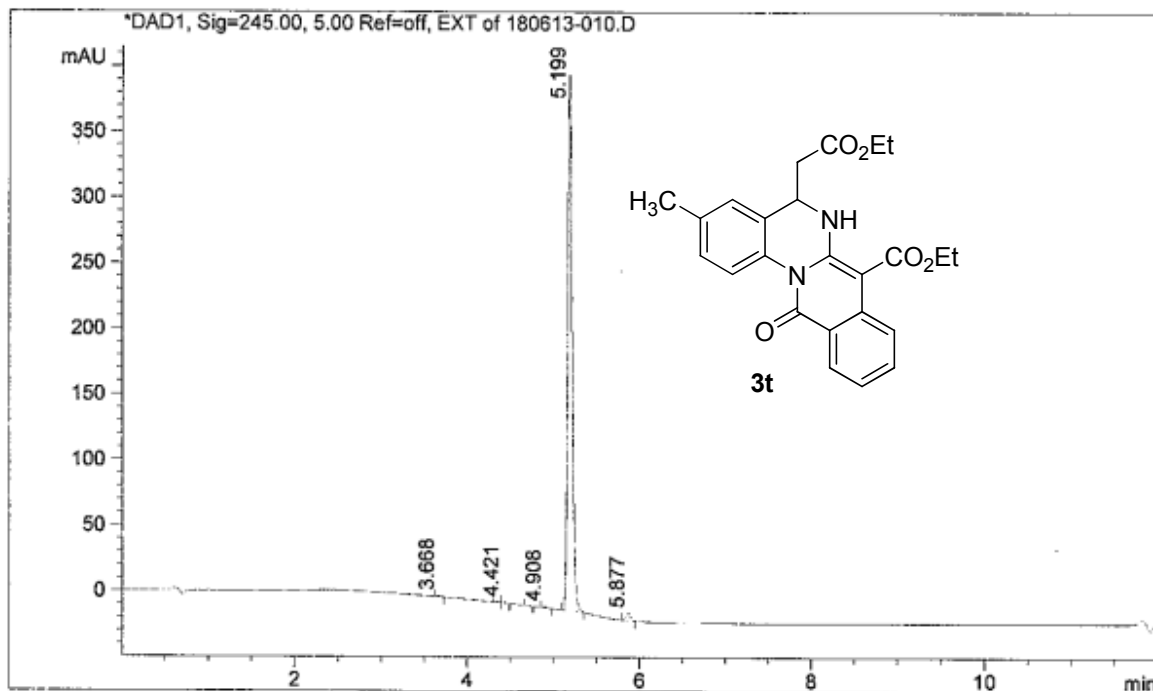

Signal 1: DAD1, Sig=245.00, 5.00 Ref=off, EXT

| Peak # | RT [min] | Area     | Area % |
|--------|----------|----------|--------|
| 1      | 3.668    | 1.676    | 0.112  |
| 2      | 4.361    | 2.207    | 0.148  |
| 3      | 4.421    | 1.648    | 0.110  |
| 4      | 4.721    | 1.388    | 0.093  |
| 5      | 4.908    | 2.510    | 0.168  |
| 6      | 5.199    | 1464.308 | 97.996 |
| 7      | 5.877    | 20.523   | 1.373  |



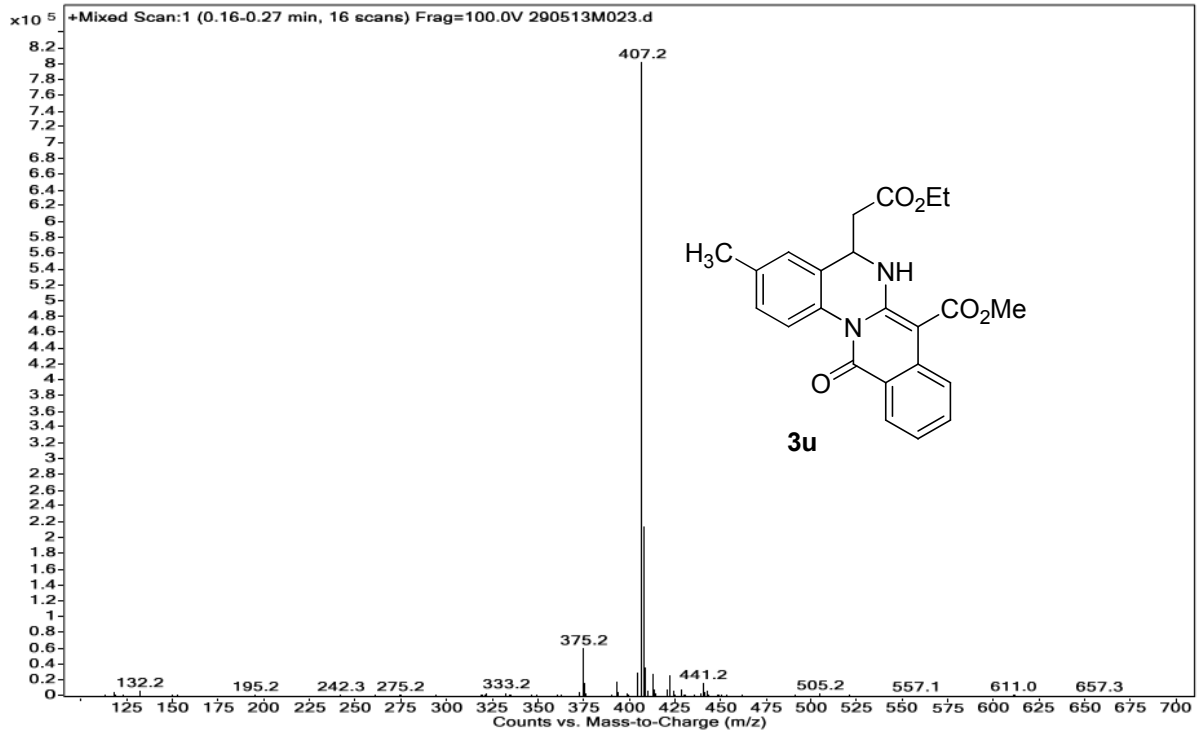

Injection Date : Thu, 27. Jun. 2013  
 Sample Name : ILS/ARJ/4/2  
 Acq Operator : RADHA  
 Acq. Method : D:\chem32\1\DATA\270613-MC 2013-06-27 18-24-09\C-18 ->  
 Analysis Method : D:\CHEM32\_002\1\METHODS\C-18 A50B50-GM.M  
 Method Info : Column : Symmetry C-18 75\*4.6mm,3.5µm  
 Mobile phase: A) 0.1% HCOOH in Water , B) ACN (gradient )  
 T/B%:0/50,0.5/50,6/98,10/98,10.5/50,12/50  
 Flow: 1.0 ml/min, Diluent: ACN:Water(90:10)

Seq Line : 11  
 Location : Vial 80  
 Inj. No. : 1  
 Inj. Vol. : 5 µl

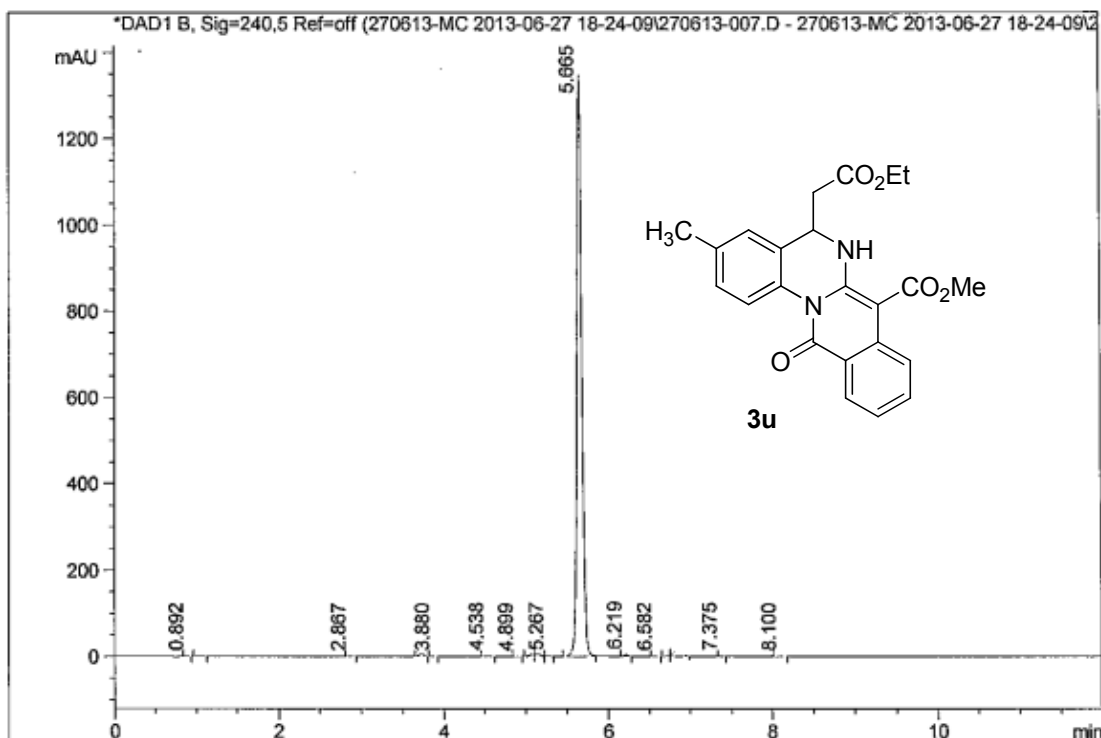

Signal 1: DAD1 B, Sig=240,5 Ref=off

| Peak # | RT [min] | Area   | Area % | Peak # | RT [min] | Area     | Area % |
|--------|----------|--------|--------|--------|----------|----------|--------|
| 1      | 0.892    | 1.028  | 0.017  | 10     | 5.267    | 1.883    | 0.030  |
| 2      | 1.019    | 2.796  | 0.045  | 11     | 5.665    | 5631.288 | 97.936 |
| 3      | 2.867    | 1.927  | 0.031  | 12     | 6.219    | 12.389   | 0.200  |
| 4      | 3.729    | 22.696 | 0.366  | 13     | 6.582    | 2.462    | 0.040  |
| 5      | 3.880    | 1.755  | 0.028  | 14     | 6.753    | 6.162    | 0.100  |
| 6      | 4.538    | 8.155  | 0.132  | 15     | 6.861    | 5.158    | 0.350  |
| 7      | 4.899    | 1.852  | 0.030  | 16     | 7.375    | 1.648    | 0.027  |
| 8      | 5.065    | 20.447 | 0.330  | 17     | 8.100    | 2.875    | 0.046  |
| 9      | 5.151    | 18.080 | 0.292  |        |          |          |        |

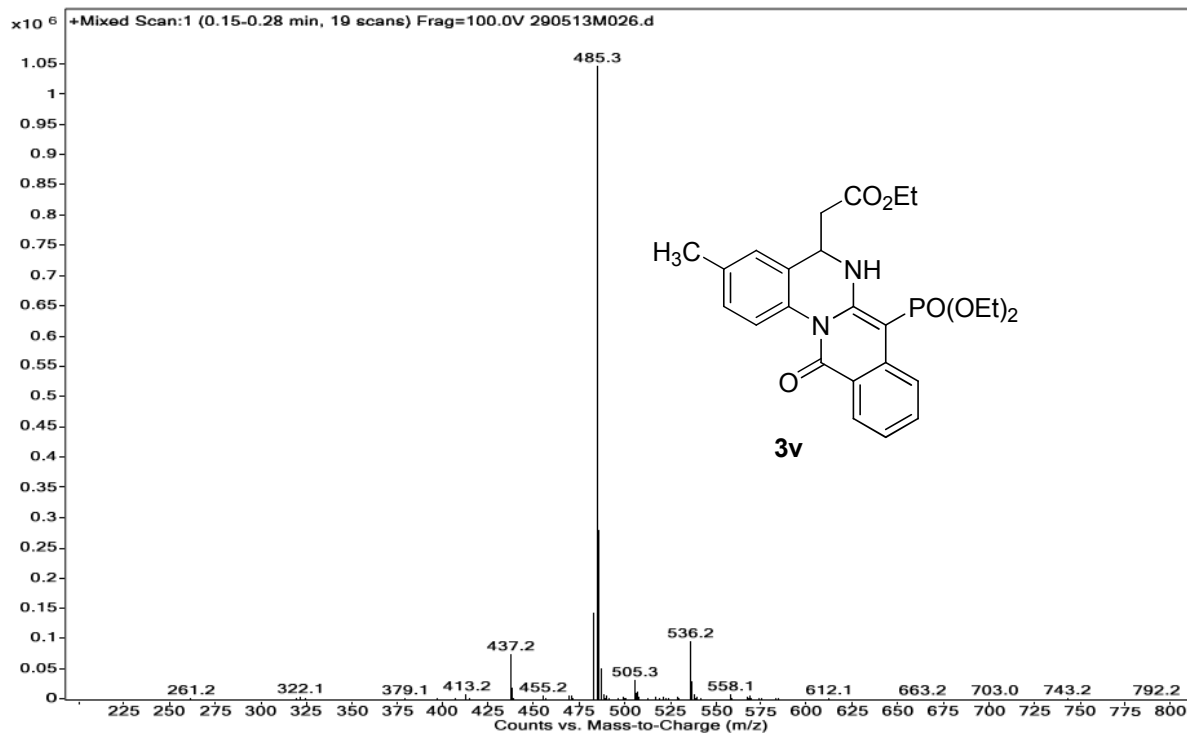

Injection Date : Thu, 27. Jun. 2013                      Seq Line :            10  
 Sample Name    : ILS/ARJ/4/5                                Location    :        Vial 79  
 Acq Operator   : RADHA                                        Inj. No.    :            1  
 Acq. Method    : D:\chem32\1\DATA\270613-MC 2013-06-27 18-24-09\C-18 -> Inj. Vol.    :            5 µl  
 Analysis Method : D:\CHEM32\_002\1\METHODS\C-18 A50B50-GM.M  
 Method Info    : Column : Symmetry C-18 75\*4.6mm, 3.5µm  
                   Mobile phase: A) 0.1% HCOOH in Water , B) ACN (gradient )  
                   T/B%:0/50,0.5/50,6/98,10/98,10.5/50,12/50  
                   Flow: 1.0 ml/min, Diluent: ACN:Water(90:10)

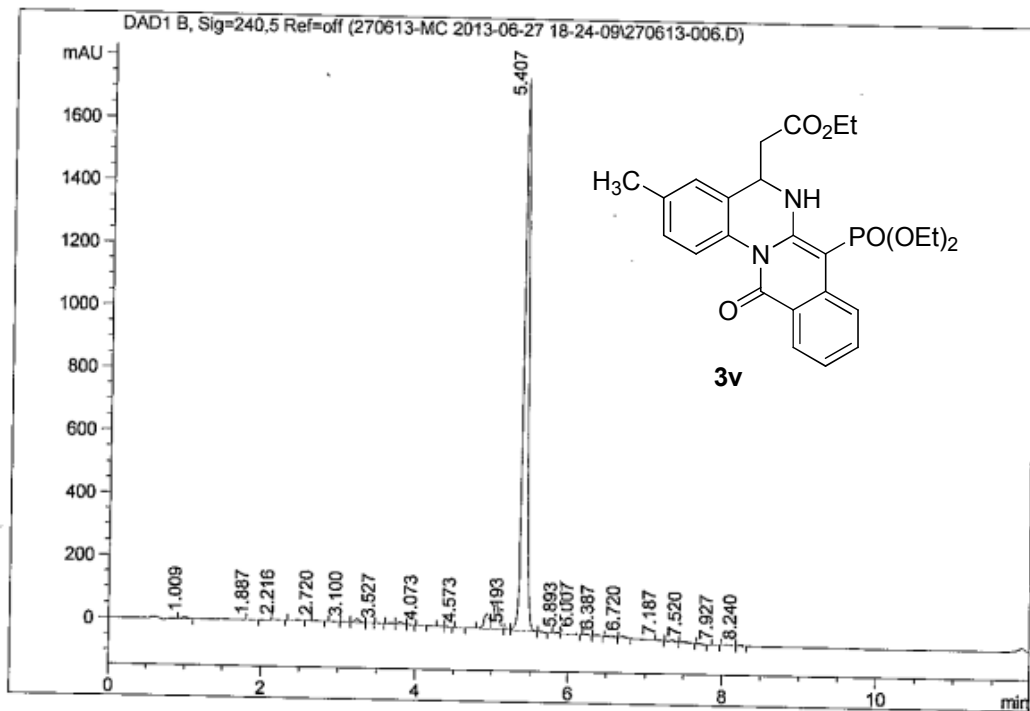

Signal 1: DAD1 B, Sig=240,5 Ref=off

| Peak # | RT [min] | Area   | Area % | Peak # | RT [min] | Area     | Area % |
|--------|----------|--------|--------|--------|----------|----------|--------|
| 1      | 1.009    | 16.882 | 0.175  | 13     | 3.913    | 4.755    | 0.049  |
| 2      | 1.887    | 1.535  | 0.016  | 14     | 4.073    | 3.448    | 0.036  |
| 3      | 2.216    | 6.659  | 0.069  | 15     | 4.347    | 7.240    | 0.075  |
| 4      | 2.473    | 9.882  | 0.103  | 16     | 4.400    | 6.571    | 0.068  |
| 5      | 2.720    | 3.246  | 0.034  | 17     | 4.573    | 1.453    | 0.015  |
| 6      | 2.940    | 2.594  | 0.027  | 18     | 4.927    | 214.291  | 2.225  |
| 7      | 3.100    | 3.878  | 0.040  | 19     | 5.052    | 404.548  | 4.200  |
| 8      | 3.246    | 51.016 | 0.530  | 20     | 5.193    | 7.334    | 0.076  |
| 9      | 3.400    | 1.097  | 0.011  | 21     | 5.407    | 8528.083 | 89.952 |
| 10     | 3.527    | 2.756  | 0.029  | 22     | 5.653    | 4.753    | 0.049  |
| 11     | 3.693    | 15.851 | 0.165  | 23     | 5.893    | 14.094   | 0.146  |
| 12     | 3.807    | 38.811 | 0.403  |        |          |          |        |

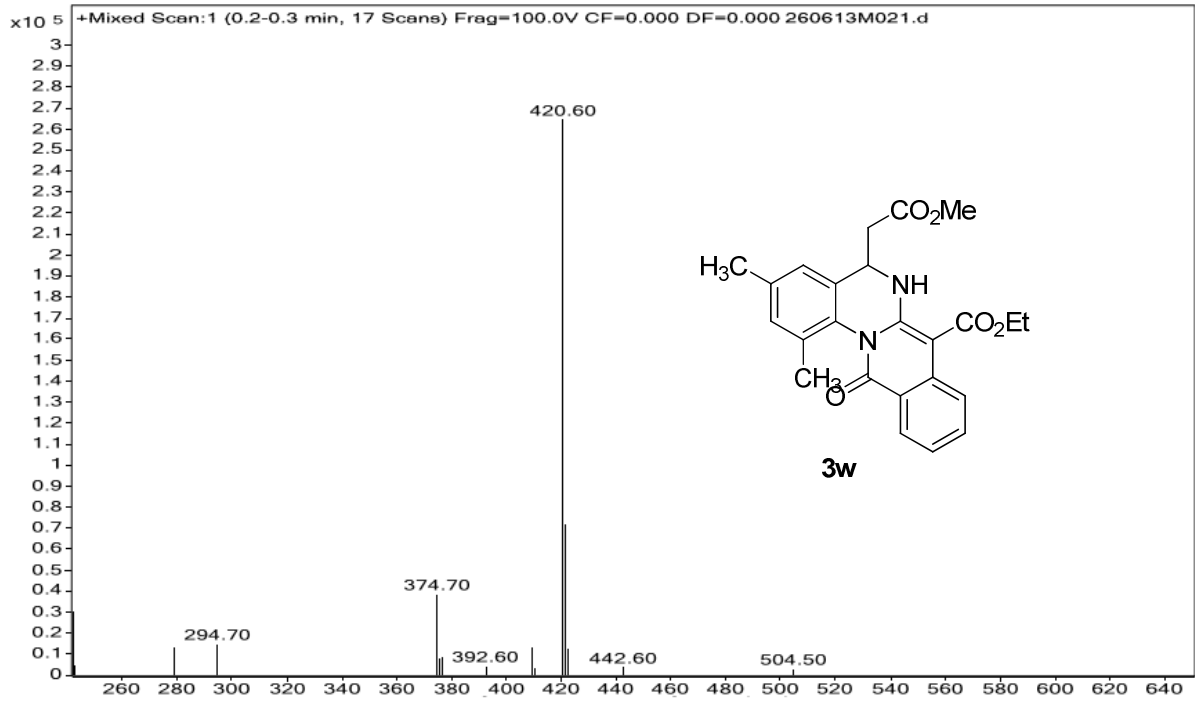

Injection Date : Tue, 16. Jul. 2013  
 Sample Name : ILS/ARJ/4/28  
 Acq Operator : RADHA  
 Acq. Method : D:\chem32\1\DATA\160713-MC 2013-07-16 18-19-54\C-18 ->  
 Analysis Method : D:\CHEM32\_002\1\METHODS\C-18 A50B50-GM.M  
 Method Info : Column : Symmetry C-18 75\*4.6mm,3.5µm  
 Mobile phase: A) 0.1% HCOOH in Water , B) ACN (gradient )  
 T/B%:0/50,1.0/50,6/98,10/98,10.5/50,12/50  
 Flow: 1.0 ml/min, Diluent: ACN:Water(90:10)

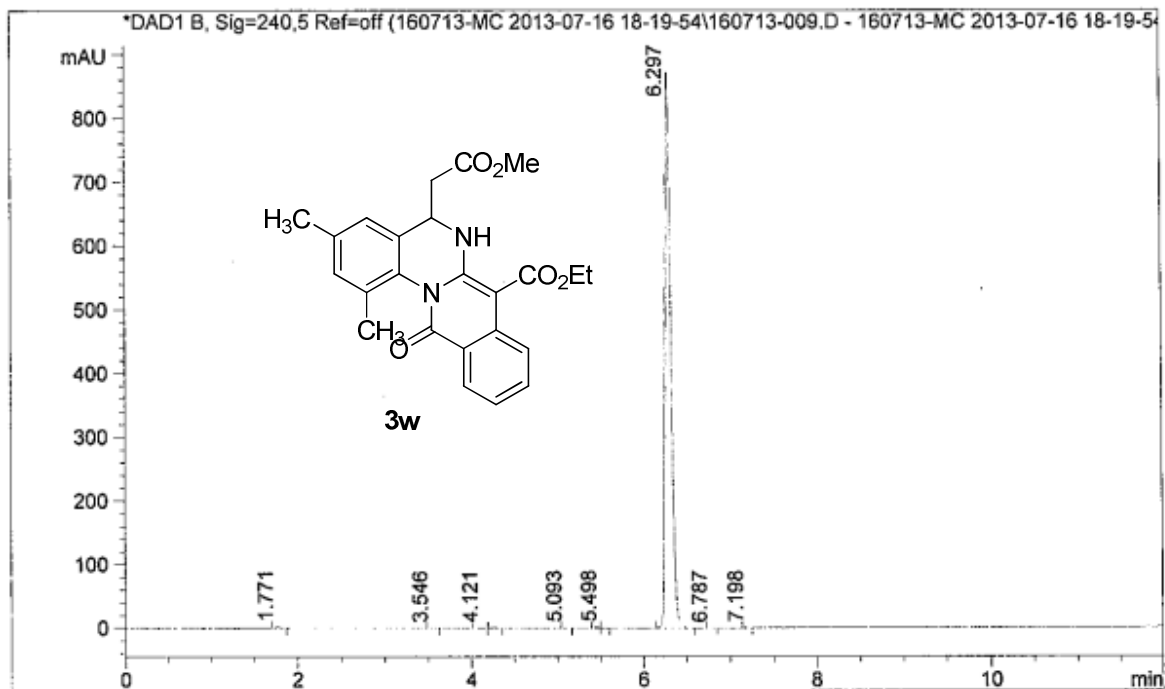

Signal 1: DAD1 B, Sig=240,5 Ref=off

| Peak # | RT [min] | Area     | Area % |
|--------|----------|----------|--------|
| 1      | 1.771    | 8.086    | 0.195  |
| 2      | 3.546    | 1.384    | 0.033  |
| 3      | 4.121    | 2.094    | 0.051  |
| 4      | 4.254    | 6.138    | 0.148  |
| 5      | 5.093    | 1.313    | 0.032  |
| 6      | 5.463    | 4.545    | 0.110  |
| 7      | 5.498    | 2.100    | 0.051  |
| 8      | 6.297    | 4113.708 | 99.331 |
| 9      | 6.787    | 1.054    | 0.025  |
| 10     | 7.198    | 1.002    | 0.024  |

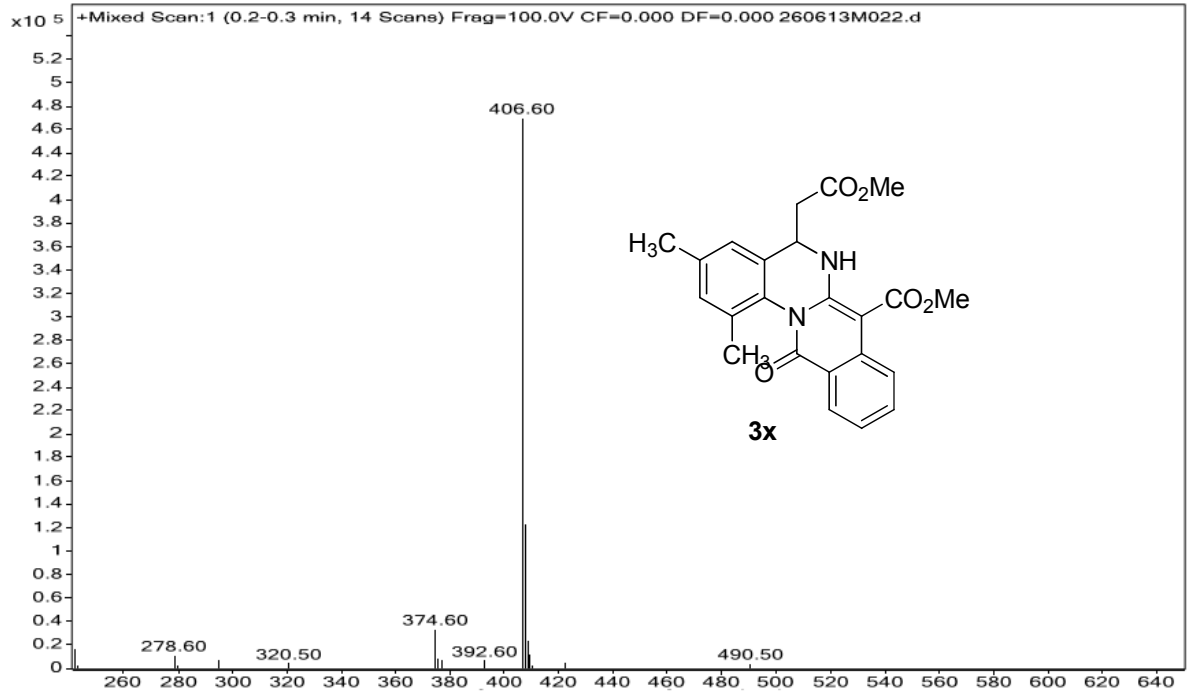





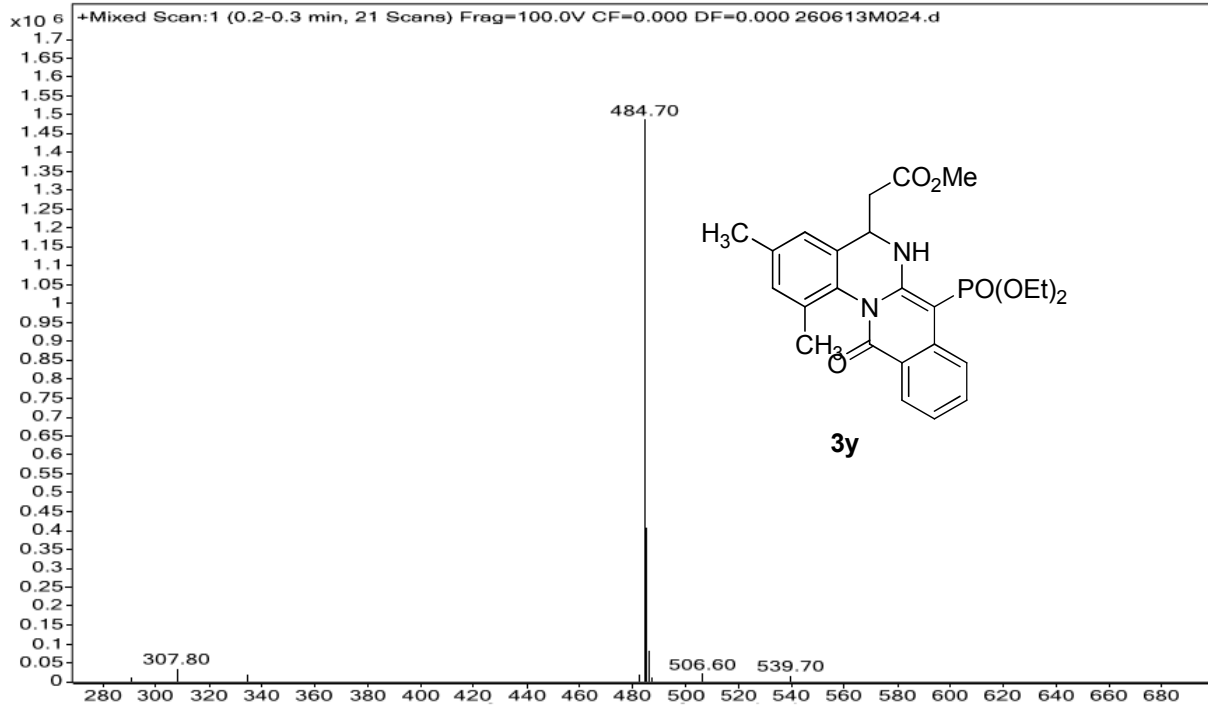

Injection Date : Tue, 16. Jul. 2013      Seq Line : 6  
 Sample Name : ILS/ARJ/4/33      Location : Vial 16  
 Acq Operator : RADHA      Inj. No. : 1  
 Acq. Method : D:\chem32\1\DATA\160713-MC 2013-07-16 18-19-54\C-18 ->      Inj. Vol. : 5 µl  
 Analysis Method : D:\CHEM32\_002\1\METHODS\C-18 A50B50-GM.M  
 Method Info : Column : Symmetry C-18 75\*4.6mm,3.5µm  
               Mobile phase: A) 0.1% HCOOH in Water , B) ACN (gradient )  
               T/B%:0/50,1.0/50,6/98,10/98,10.5/50,12/50  
               Flow: 1.0 ml/min, Diluent: ACN:Water(90:10)

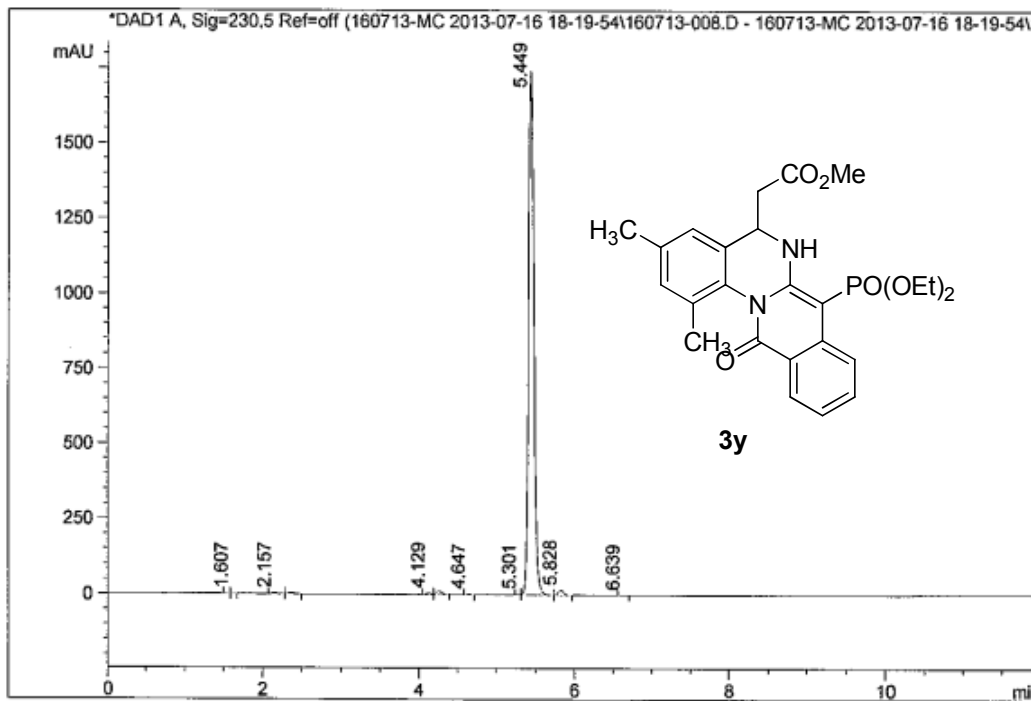

Signal 1: DAD1 A, Sig=230,5 Ref=off

| Peak # | RT [min] | Area     | Area % |
|--------|----------|----------|--------|
| 1      | 1.553    | 1.958    | 0.023  |
| 2      | 1.607    | 1.019    | 0.012  |
| 3      | 2.157    | 13.370   | 0.159  |
| 4      | 2.371    | 18.903   | 0.224  |
| 5      | 4.129    | 20.280   | 0.241  |
| 6      | 4.259    | 49.344   | 0.586  |
| 7      | 4.647    | 2.126    | 0.025  |
| 8      | 5.301    | 2.924    | 0.035  |
| 9      | 5.449    | 8245.056 | 97.876 |
| 10     | 5.828    | 67.835   | 0.805  |
| 11     | 6.639    | 1.163    | 0.014  |

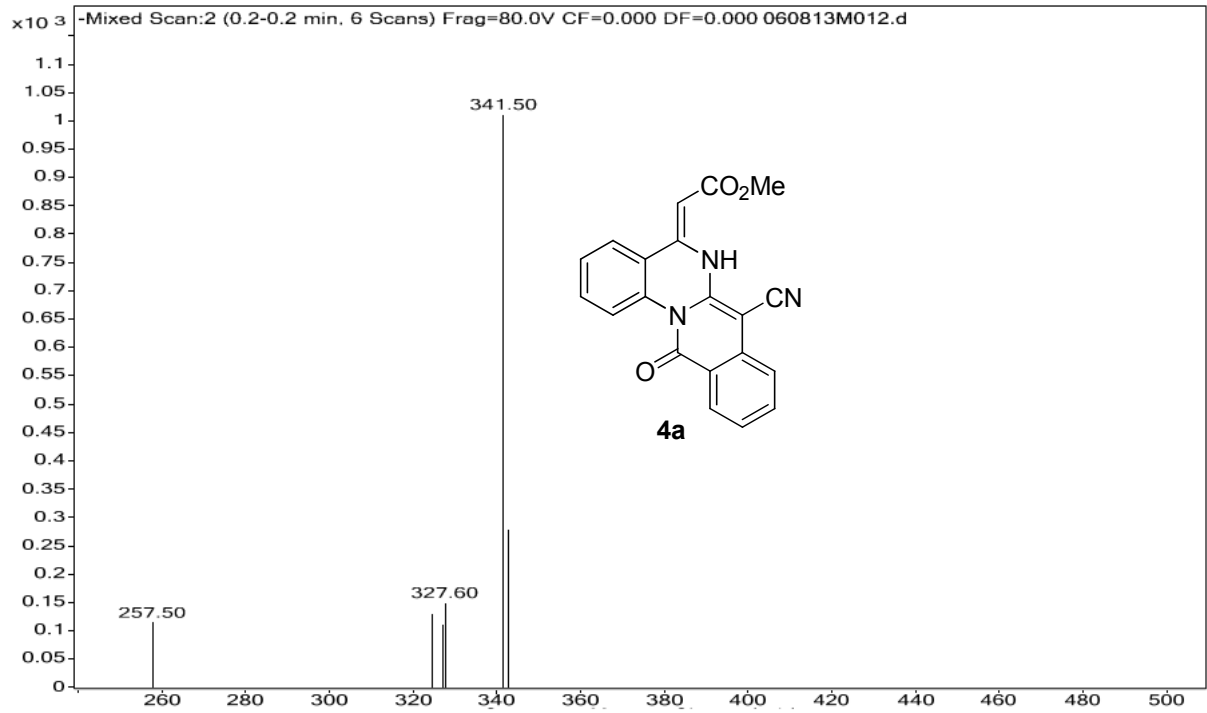

Injection Date : Tue, 6. Aug. 2013  
 Sample Name : ILS-ARJ-4-68  
 Acq Operator : RADHA  
 Acq. Method : D:\chem32\1\DATA\060813-MC 2013-08-06 19-05-44\C-18 ->  
 Analysis Method : D:\CHEM32\_002\1\METHODS\C-18 A80B20GM.M  
 Method Info : Column:Symmetry C-18 75\*4.6mm,3.5µ  
 Mobile phase: A) 0.1% HCOOH in Water , B) ACN  
 T/B%:0/50,1/50,4/98,10/98,10.5/50,12/50  
 Flow: 1.0 ml/min, Diluent: ACN:Water(90:10)

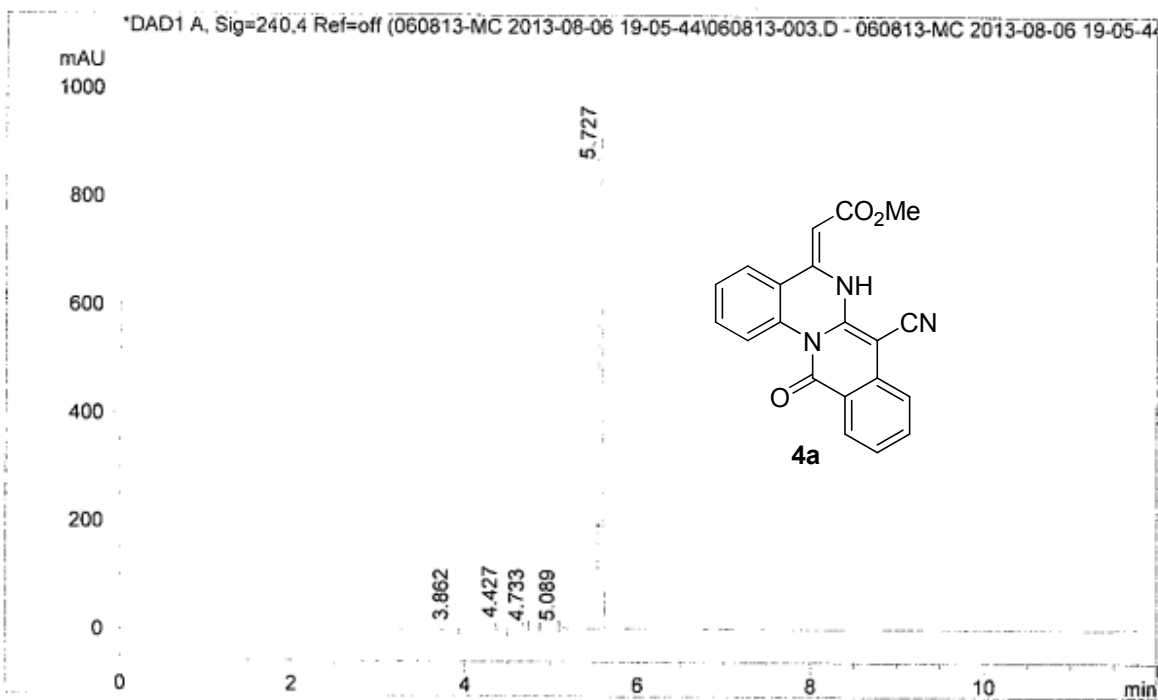

Signal 1: DAD1 A, Sig=240,4 Ref=off

| Peak # | RT [min] | Area     | Area % |
|--------|----------|----------|--------|
| 1      | 3.862    | 16.002   | 0.470  |
| 2      | 4.427    | 82.888   | 2.666  |
| 3      | 4.733    | 8.814    | 0.259  |
| 4      | 4.785    | 45.060   | 1.324  |
| 5      | 5.089    | 5.246    | 0.154  |
| 6      | 5.727    | 3215.073 | 95.126 |

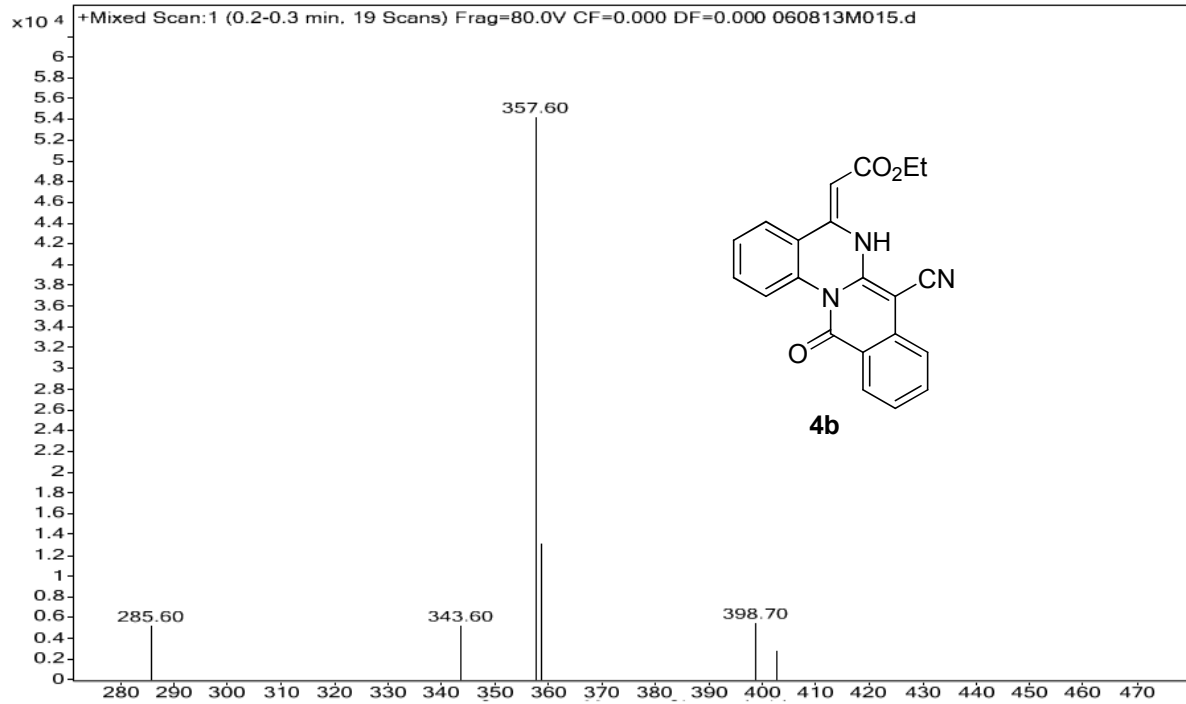

Injection Date : Mon, 19. Aug. 2013  
 Sample Name : ILS-ARJ-4-64  
 Acq Operator : RADHA  
 Acq. Method : D:\chem32\1\DATA\190813-MC 2013-08-19 18-57-30\C-18 ->  
 Analysis Method : D:\CHEM32\_002\1\METHODS\C-18 A50B50-GM.M  
 Method Info : Column : Symmetry C-18 75\*4.6mm,3.5µm  
 Mobile phase: A) 0.1% HCOOH in Water , B) ACN  
 T/B%:0/50,1/50,4/98,10/98,10.5/50,12/50  
 Flow: 1.0 ml/min, Diluent: ACN:Water(90:10)

Seq Line : 5  
 Location : Vial 13  
 Inj. No. : 1  
 Inj. Vol. : 5 µl

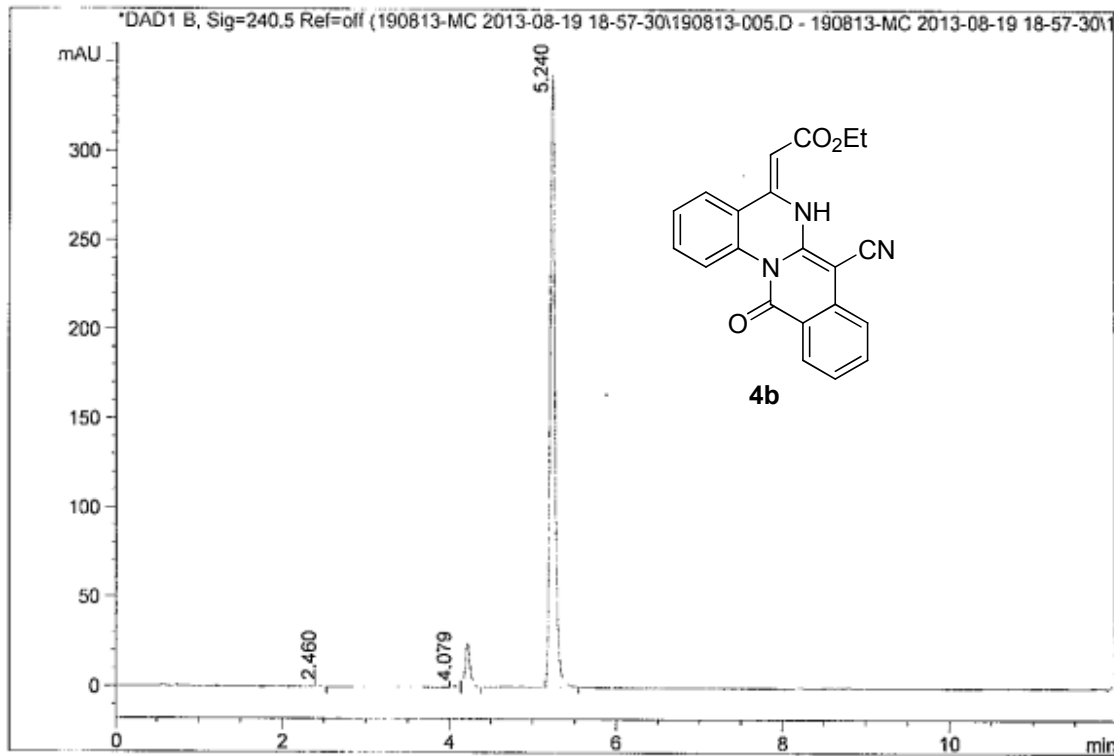

Signal 1: DAD1 B, Sig=240,5 Ref=off

| Peak # | RT [min] | Area     | Area % |
|--------|----------|----------|--------|
| 1      | 2.460    | 1.248    | 0.086  |
| 2      | 4.079    | 2.312    | 0.158  |
| 3      | 4.222    | 95.930   | 6.573  |
| 4      | 5.240    | 1359.985 | 93.183 |

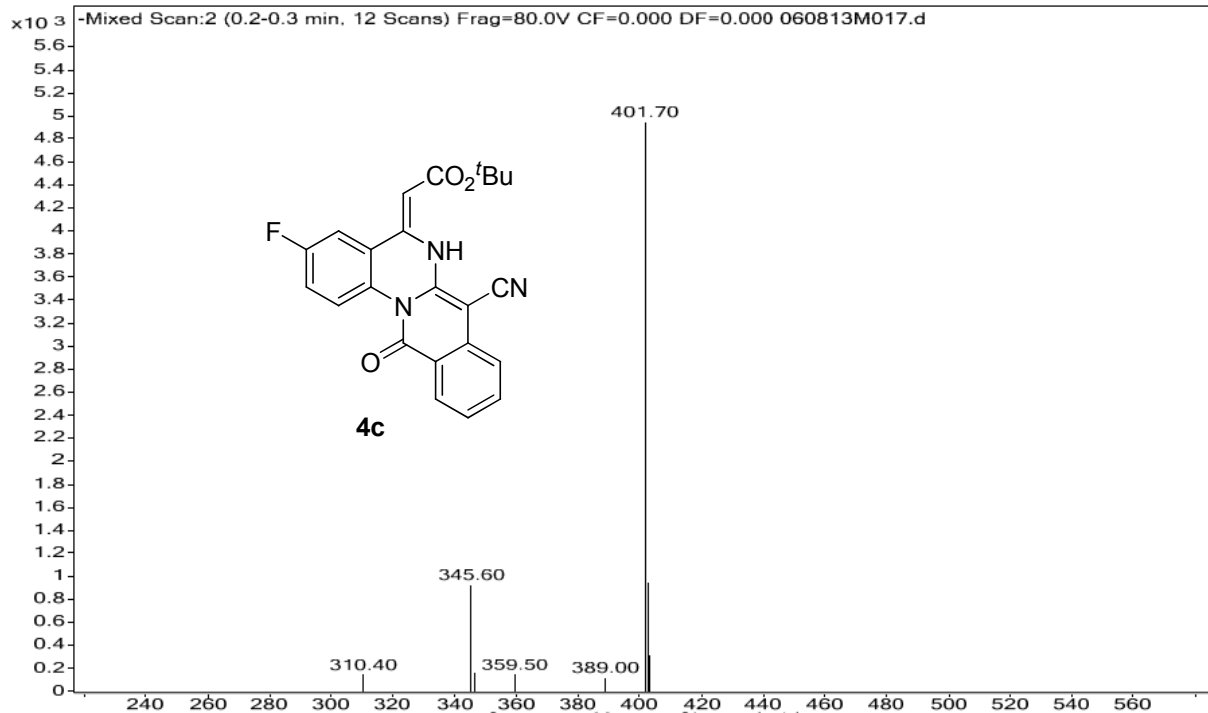

|                                                                      |                       |
|----------------------------------------------------------------------|-----------------------|
|                                                                      | Seq Line : /          |
| Injection Date : Mon, 19. Aug. 2013                                  | Location : Vial 15    |
| Sample Name : ILS-ARJ-4-11                                           | Inj. No. : 1          |
| Acq Operator : RADHA                                                 | Inj. Vol. : 5 $\mu$ l |
| Acq. Method : D:\chem32\1\DATA\190813-MC 2013-08-19 18-57-30\C-18 -> |                       |
| Analysis Method : D:\CHEM32_002\1\METHODS\C-18 A50B50-GM.M           |                       |
| Method Info : Column : Symmetry C-18 75*4.6mm,3.5 $\mu$ m            |                       |
| Mobile phase: A) 0.1% HCOOH in Water , B) ACN                        |                       |
| T/B%:0/50,1/50,4/98,10/98,10.5/50,12/50                              |                       |
| Flow: 1.0 ml/min, Diluent: ACN:Water(90:10)                          |                       |

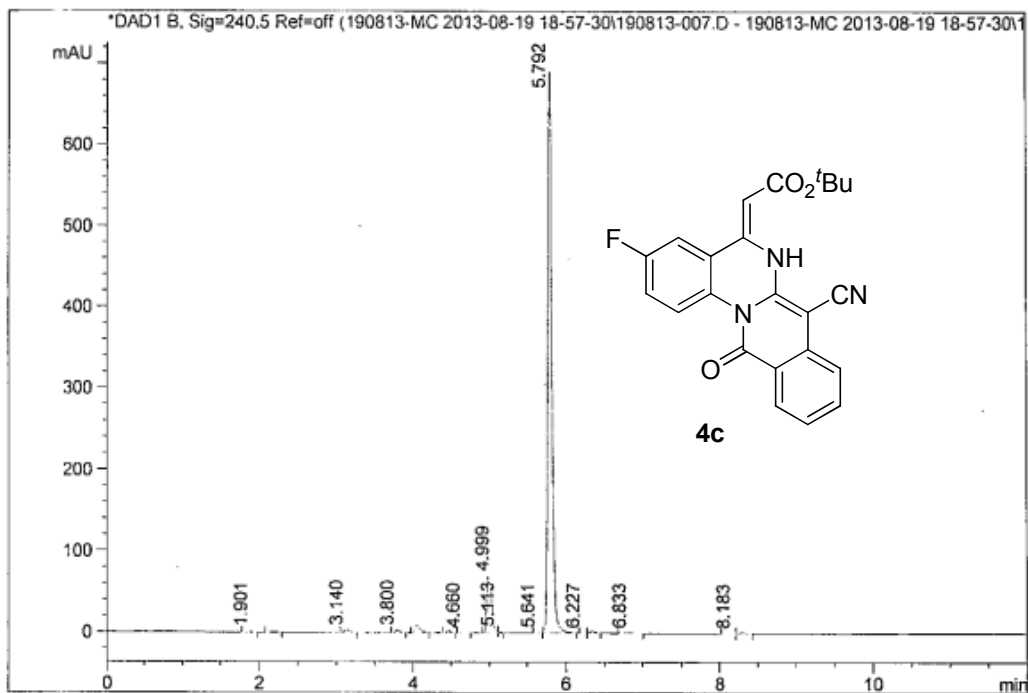

Signal 1: DAD1 B, Sig=240,5 Ref=off

| Peak # | RT [min] | Area     | Area % |
|--------|----------|----------|--------|
| 1      | 1.901    | 2.375    | 0.078  |
| 2      | 2.191    | 3.200    | 0.105  |
| 3      | 3.140    | 14.892   | 0.491  |
| 4      | 3.800    | 13.069   | 0.431  |
| 5      | 4.059    | 36.089   | 1.189  |
| 6      | 4.469    | 6.969    | 0.230  |
| 7      | 4.660    | 1.179    | 0.039  |
| 8      | 4.999    | 320.646  | 5.464  |
| 9      | 5.113    | 2.288    | 0.075  |
| 10     | 5.641    | 1.287    | 0.042  |
| 11     | 5.792    | 2602.894 | 90.858 |
| 12     | 6.227    | 1.314    | 0.043  |



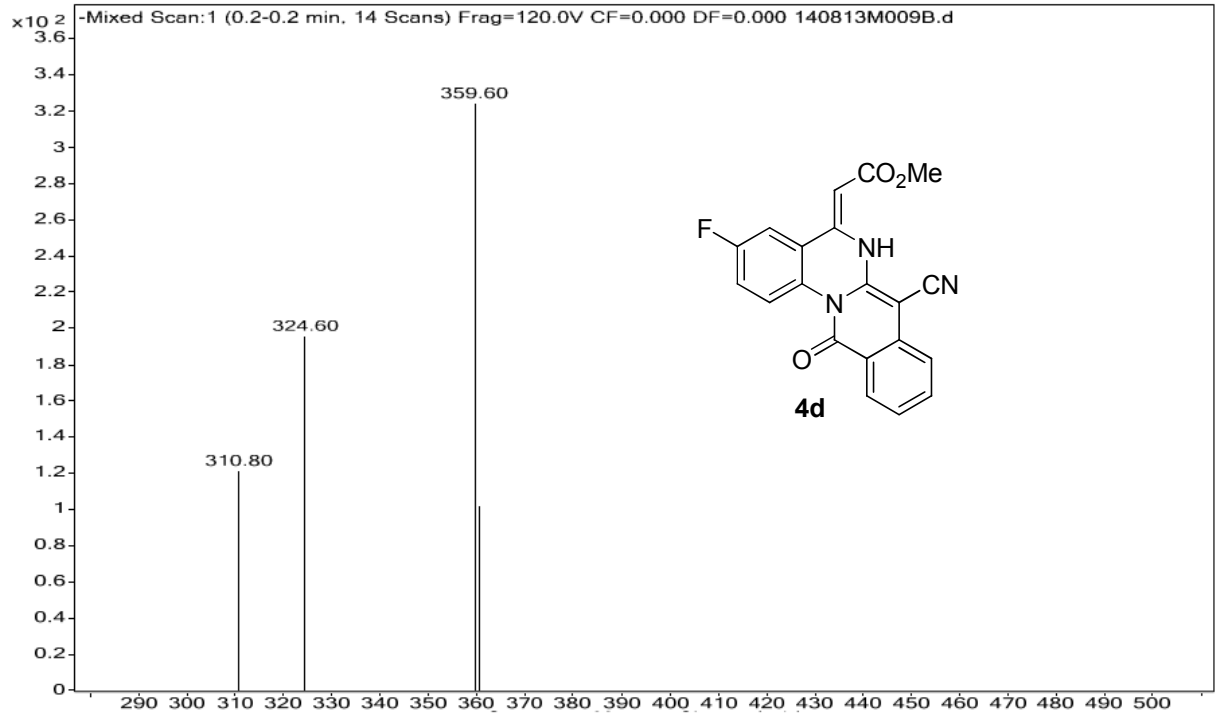

Injection Date : Tue, 6. Aug. 2013  
 Sample Name : ILS-ARJ-4-42  
 Acq Operator : RADHA  
 Acq. Method : D:\chem32\1\DATA\060813-MC 2013-08-06 19-05-44\C-18 ->  
 Analysis Method : D:\CHEM32\_002\1\METHODS\C-18 A80B20GM.M  
 Method Info : Column:Symmetry C-18 75\*4.6mm,3.5µ  
 Mobile phase: A) 0.1% HCOOH in Water , B) ACN  
 T/B%:0/50,1/50,4/98,10/98,10.5/50,12/50  
 Flow: 1.0 ml/min, Diluent: ACN:Water(90:10)

Seq Line : 5  
 Location : Vial 24  
 Inj. No. : 1  
 Inj. Vol. : 5 µl

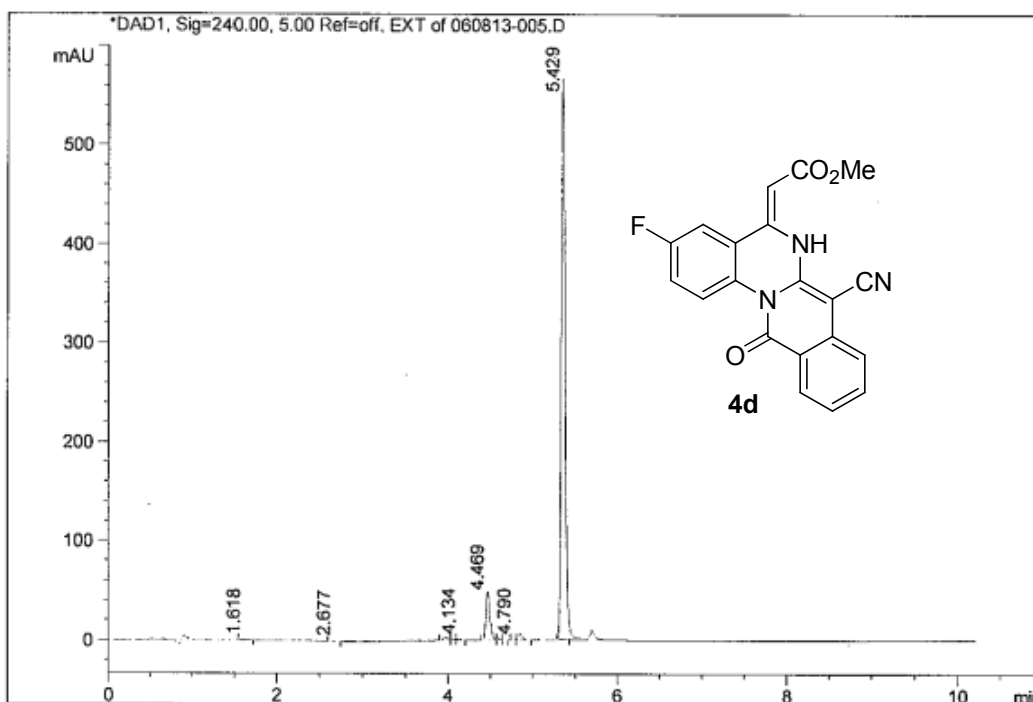

Signal 1: DAD1, Sig=240.00, 5.00 Ref=off, EXT

| Peak # | RT [min] | Area     | Area-% |
|--------|----------|----------|--------|
| 1      | 1.618    | 1.931    | 0.092  |
| 2      | 2.677    | 1.649    | 0.079  |
| 3      | 3.974    | 10.801   | 0.517  |
| 4      | 4.056    | 3.673    | 0.176  |
| 5      | 4.134    | 3.126    | 0.149  |
| 6      | 4.469    | 110.077  | 5.525  |
| 7      | 4.595    | 4.004    | 0.191  |
| 8      | 4.634    | 1.256    | 0.060  |
| 9      | 4.790    | 1.245    | 0.060  |
| 10     | 4.860    | 19.489   | 0.932  |
| 11     | 5.429    | 1923.689 | 92.319 |

*RP*  
*07/08*

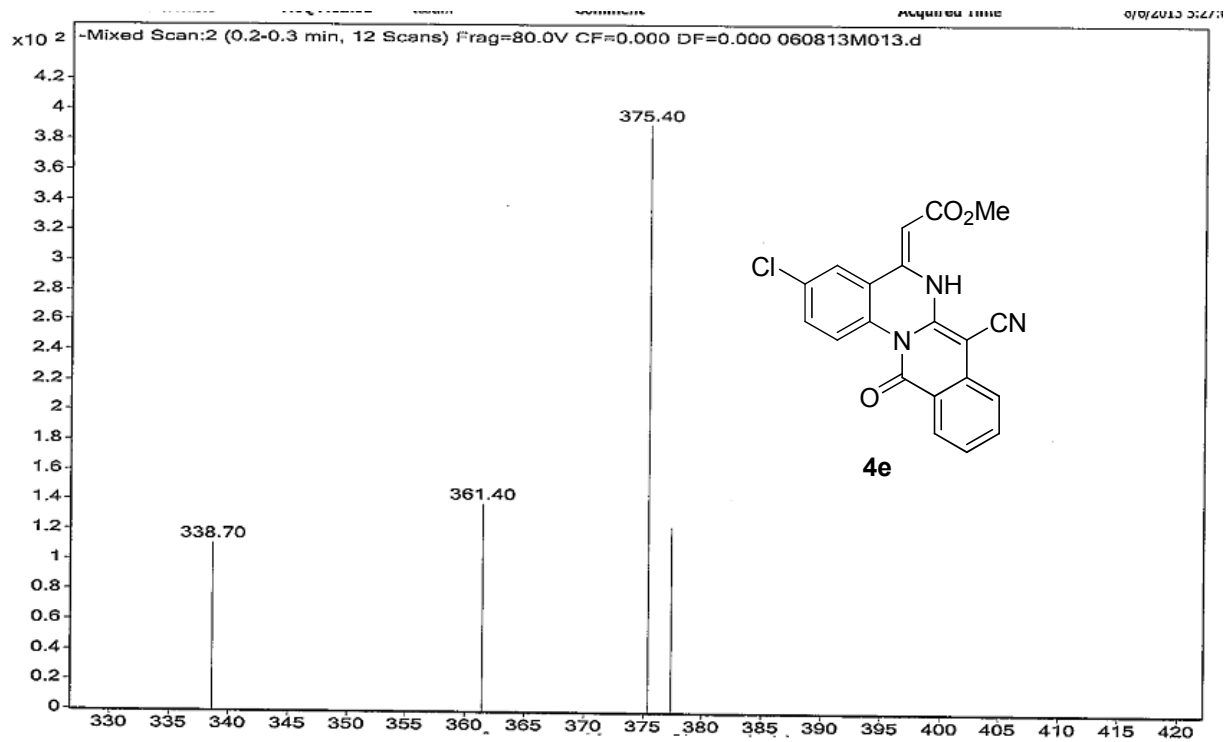

Injection Date : Tue, 6. Aug. 2013  
 Sample Name : ILS-ARJ-4-22  
 Acq Operator : RADHA  
 Acq. Method : D:\chem32\1\DATA\060813-MC 2013-08-06 19-05-44\C-18 ->  
 Analysis Method : D:\CHEM32\_002\1\METHODS\C-18 A80B20GM.M  
 Method Info : Column:Symmetry C-18 75\*4.6mm,3.5µ  
 Mobile phase: A) 0.1% HCOOH in Water , B) ACN  
 T/B%:0/50,1/50,4/98,10/98,10.5/50,12/50  
 Flow: 1.0 ml/min, Diluent: ACN:Water(90:10)

Seq Line : 8  
 Location : Vial 21  
 Inj. No. : 1  
 Inj. Vol. : 5 µl

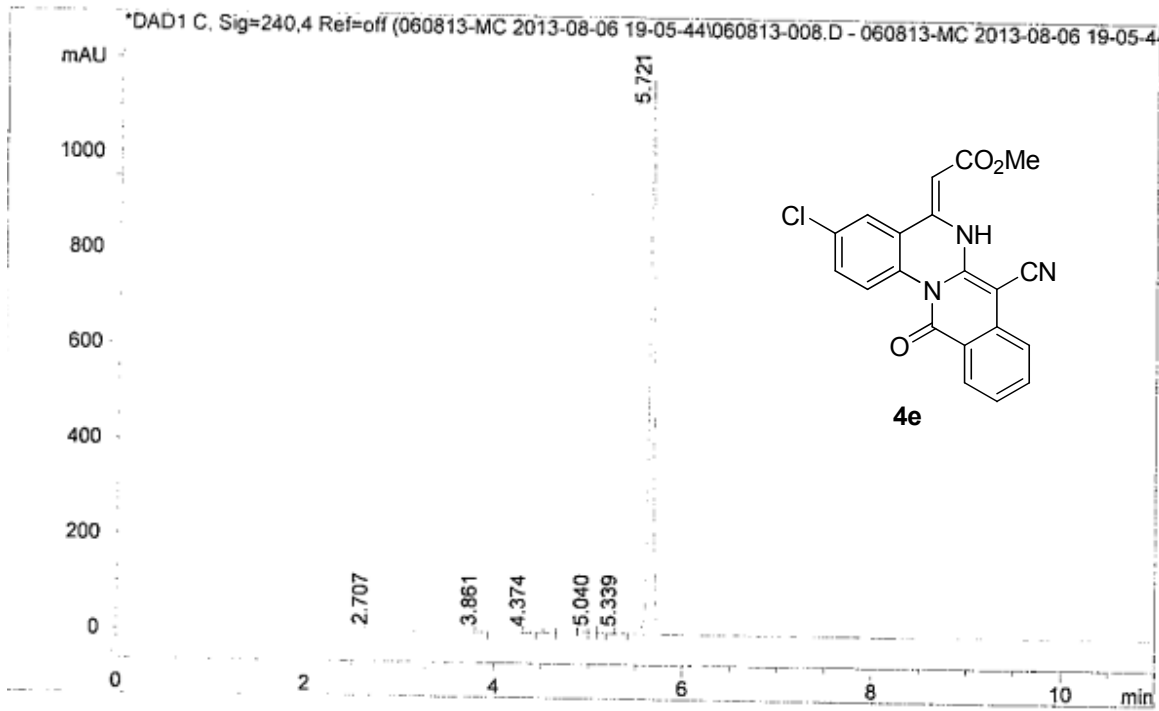

Signal 1: DAD1 C, Sig=240,4 Ref=off

| Peak # | RT [min] | Area     | Area % |
|--------|----------|----------|--------|
| 1      | 2.707    | 1.867    | 0.048  |
| 2      | 3.861    | 5.225    | 0.135  |
| 3      | 4.374    | 133.317  | 2.486  |
| 4      | 4.583    | 2.869    | 0.074  |
| 5      | 4.895    | 13.728   | 0.355  |
| 6      | 5.040    | 121.156  | 2.330  |
| 7      | 5.127    | 4.488    | 0.116  |
| 8      | 5.339    | 7.467    | 0.193  |
| 9      | 5.721    | 3628.149 | 94.263 |

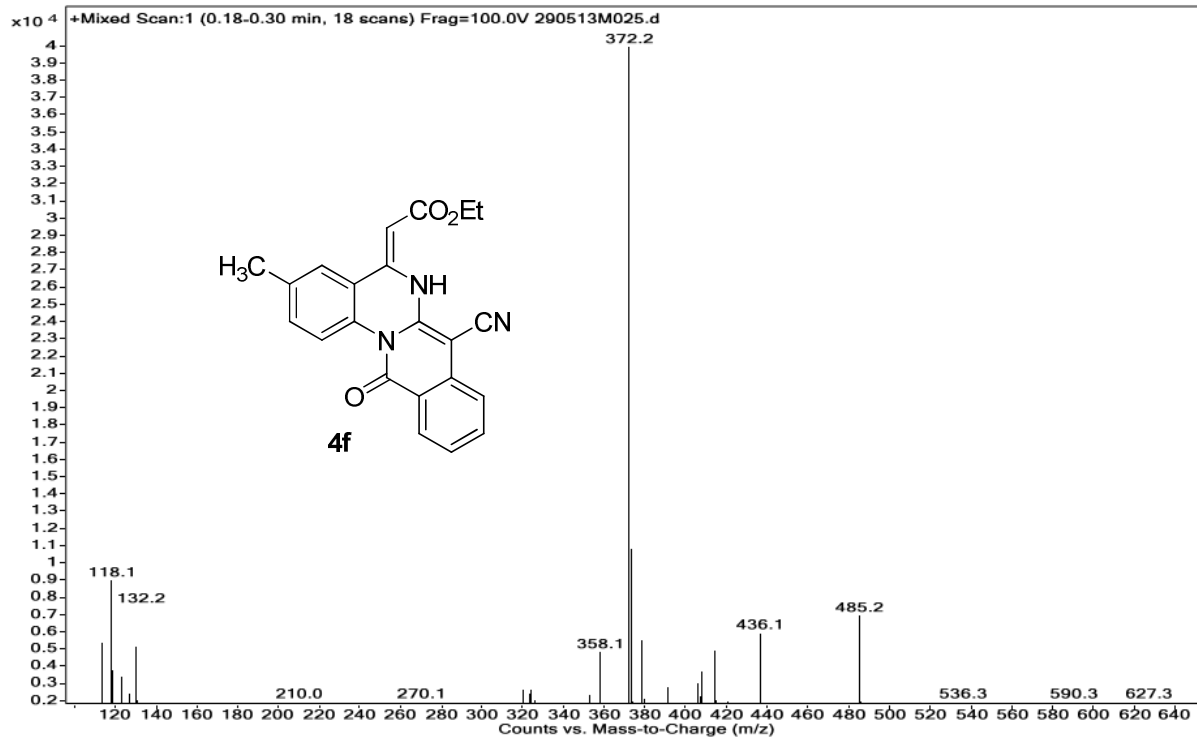

```

Injection Date  : Mon, 19. Aug. 2013                Seq Line   :           10
Sample Name    : ILS-ARJ-4-4                       Location    :           Vial 18
Acq Operator   : RADHA                               Inj. No.   :           1
Acq. Method    : D:\chem32\1\DATA\190813-MC 2013-08-19 18-57-30\C-18 -> Inj. Vol.  :           5 µl
Analysis Method : D:\CHEM32_002\1\METHODS\C-18 A50B50-GM.M
Method Info    : Column : Symmetry C-18 75*4.6mm,3.5µm
                  Mobile phase: A) 0.1% HCOOH in Water , B) ACN
                  T/B%:0/50,1/50,4/98,10/98,10.5/50,12/50
                  Flow: 1.0 ml/min, Diluent: ACN:Water(90:10)

```

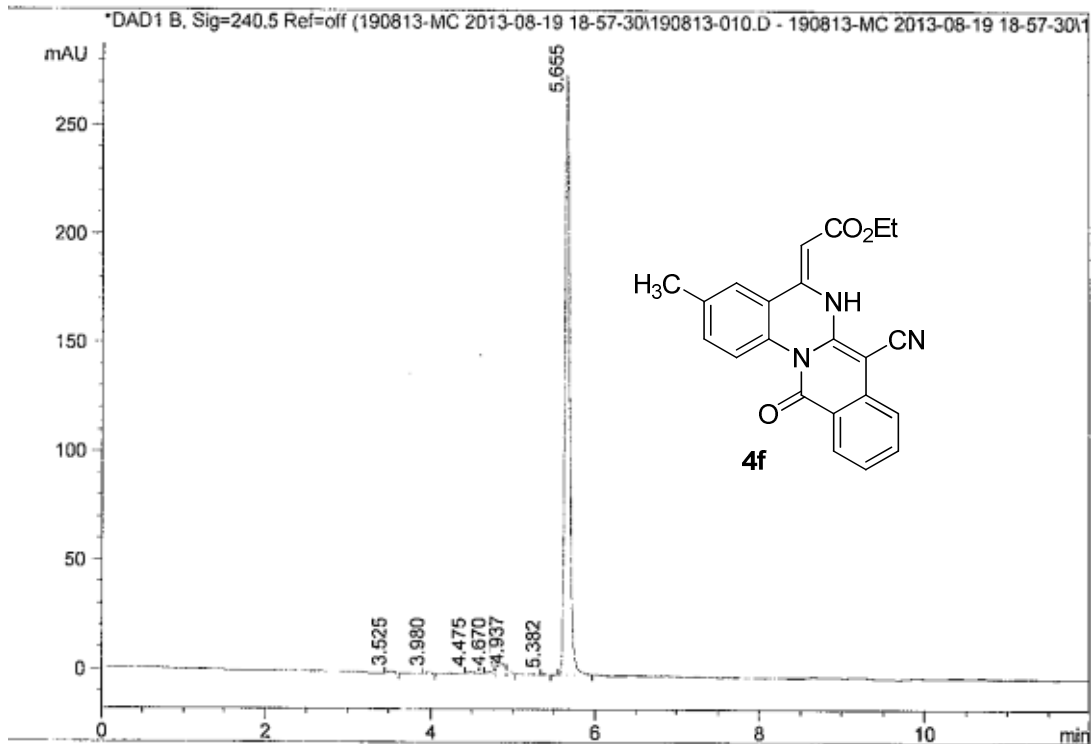

Signal 1: DAD1 B, Sig=240,5 Ref=off

| Peak # | RT [min] | Area     | Area % |
|--------|----------|----------|--------|
| 1      | 3.525    | 4.250    | 0.321  |
| 2      | 3.980    | 3.649    | 0.275  |
| 3      | 4.475    | 3.740    | 0.282  |
| 4      | 4.670    | 53.400   | 3.834  |
| 5      | 4.848    | 30.174   | 2.276  |
| 6      | 4.937    | 6.652    | 0.502  |
| 7      | 5.382    | 1.860    | 0.140  |
| 8      | 5.655    | 1091.989 | 91.470 |

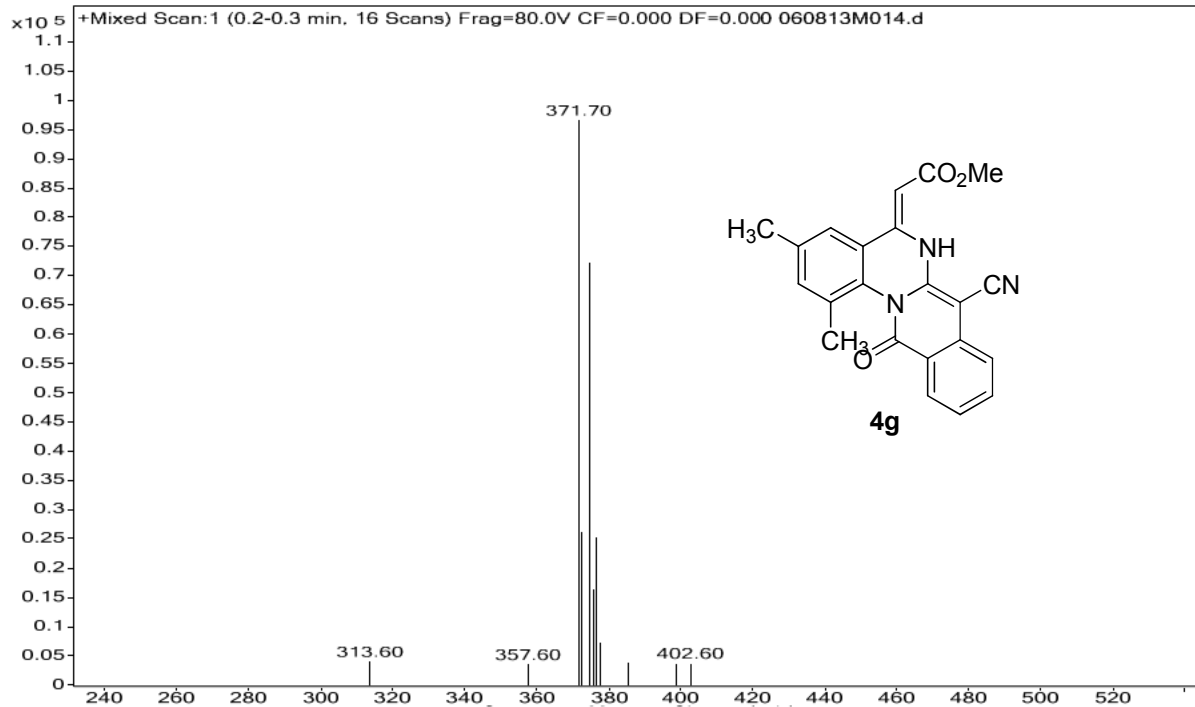

```

Injection Date   : Mon, 19. Aug. 2013
Sample Name      : ILS-ARJ-4-63
Acq Operator     : RADHA
Acq. Method      : D:\chem32\1\DATA\190813-MC 2013-08-19 18-57-30\C-18 ->
Analysis Method  : D:\CHEM32_002\1\METHODS\C-18 A50B50-GM.M
Method Info      : Column : Symmetry C-18 75*4.6mm,3.5µm
                   Mobile phase: A) 0.1% HCOOH in Water , B) ACN
                   T/B%:0/50,1/50,4/98,10/98,10.5/50,12/50
                   Flow: 1.0 ml/min, Diluent: ACN:Water(90:10)
Seq Line        :
Location        : Vial 14
Inj. No.       : 1
Inj. Vol.      : 8 µl

```

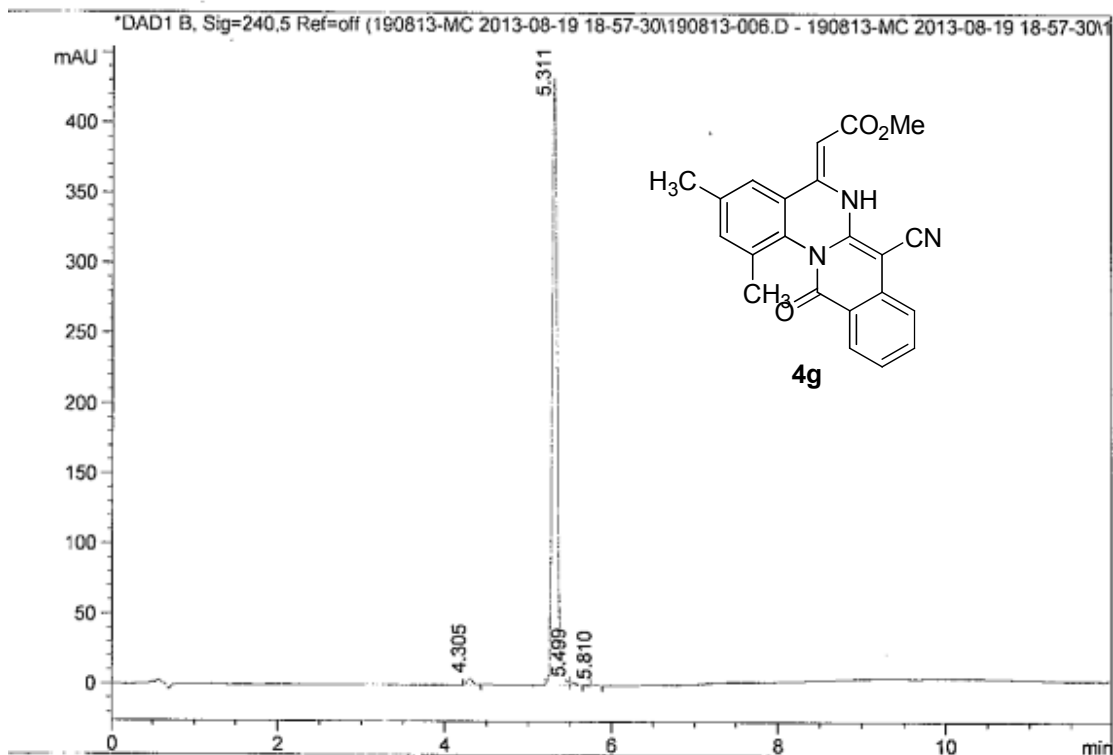

Signal 1: DAD1 B, Sig=240,5Ref=off

| Peak # | RT [min] | Area     | Area % |
|--------|----------|----------|--------|
| 1      | 4.305    | 19.110   | 1.089  |
| 2      | 5.311    | 1725.353 | 98.366 |
| 3      | 5.499    | 7.662    | 0.437  |
| 4      | 5.810    | 1.892    | 0.108  |



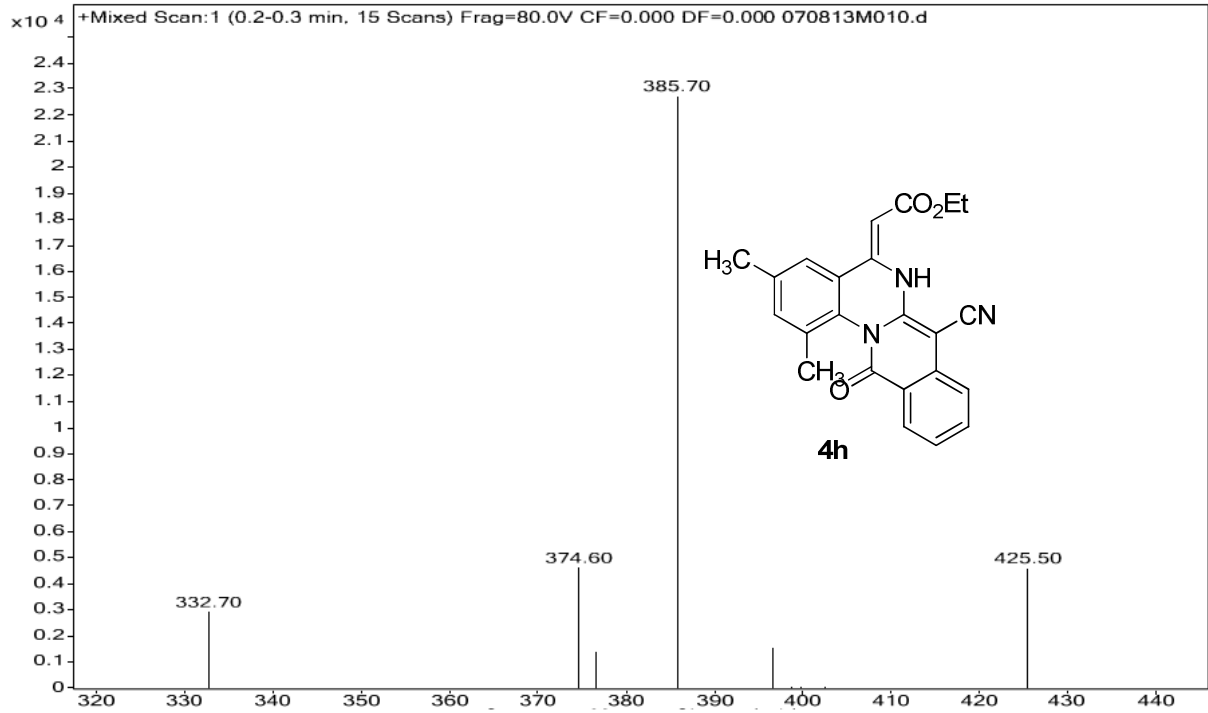

|                 |                                                          |           |           |
|-----------------|----------------------------------------------------------|-----------|-----------|
| Injection Date  | : Mon, 19. Aug. 2013                                     | Seq Line  | : 8       |
| Sample Name     | : ILS-ARJ-4-70                                           | Location  | : Vial 16 |
| Acq Operator    | : RADHA                                                  | Inj. No.  | : 1       |
| Acq. Method     | : D:\chem32\1\DATA\190813-MC 2013-08-19 18-57-30\C-18 -> | Inj. Vol. | : 8 µl    |
| Analysis Method | : D:\CHEM32_002\1\METHODS\C-18 A50B50-GM.M               |           |           |
| Method Info     | : Column : Symmetry C-18 75*4.6mm,3.5µm                  |           |           |
|                 | Mobile phase: A) 0.1% HCOOH in Water , B) ACN            |           |           |
|                 | T/B%:0/50,1/50,4/98,10/98,10.5/50,12/50                  |           |           |
|                 | Flow: 1.0 ml/min, Diluent: ACN:Water(90:10)              |           |           |

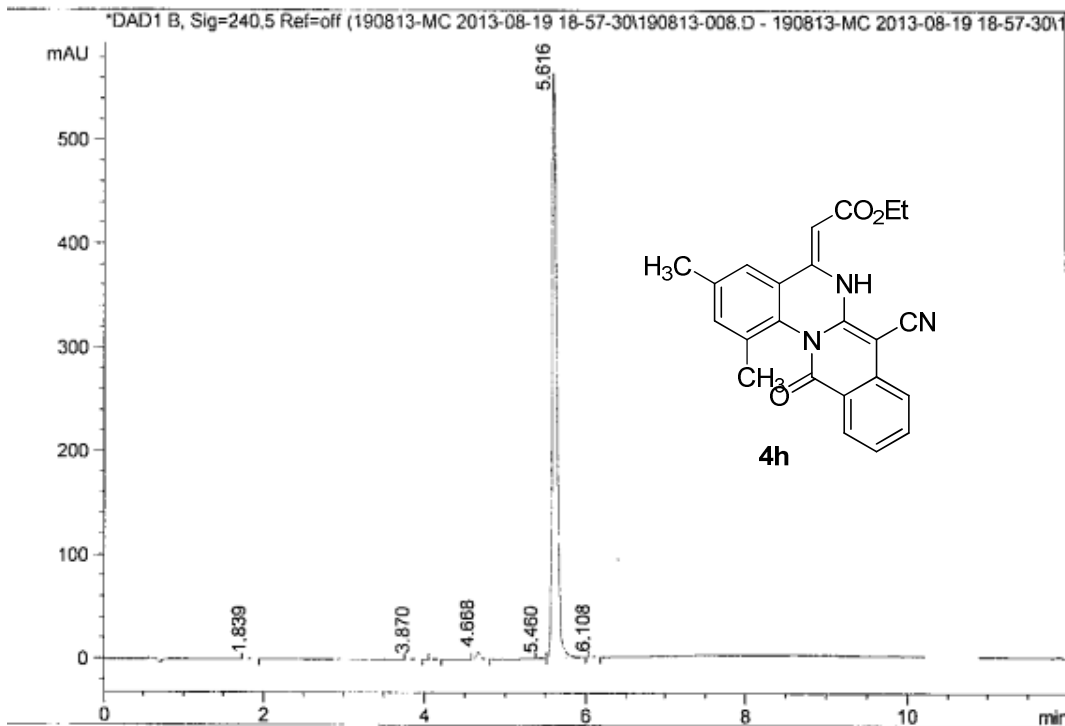

Signal 1: DAD1 B, Sig=240,5 Ref=off

| Peak # | RT [min] | Area     | Area % |
|--------|----------|----------|--------|
| 1      | 1.839    | 1.258    | 0.056  |
| 2      | 3.870    | 2.907    | 0.129  |
| 3      | 4.129    | 2.806    | 0.124  |
| 4      | 4.668    | 27.931   | 1.238  |
| 5      | 5.460    | 1.685    | 0.075  |
| 6      | 5.616    | 2217.449 | 98.288 |
| 7      | 6.108    | 2.029    | 0.090  |

RF  
20/08/13
